# Supplementary material
Source: publisher figshare collection journal article supplement (https://acs.figshare.com/ndownloader/files/4912156)
Supplement: Supplementary file 1 [file 4912156]

MODEL     1
ATOM      1  N   ASP     1      55.559  89.568  22.090  1.00  0.00
ATOM      2  CA  ASP     1      55.750  88.335  22.959  1.00  0.00
ATOM      3  CB  ASP     1      55.848  87.085  22.098  1.00  0.00
ATOM      4  CG  ASP     1      55.557  85.792  22.850  1.00  0.00
ATOM      5  OD1 ASP     1      55.457  85.798  24.092  1.00  0.00
ATOM      6  OD2 ASP     1      55.559  84.758  22.185  1.00  0.00
ATOM      7  C   ASP     1      56.856  88.428  24.086  1.00  0.00
ATOM      8  O   ASP     1      57.972  87.940  23.976  1.00  0.00
ATOM      9  N   ALA     2      56.588  89.219  25.112  1.00  0.00
ATOM     10  CA  ALA     2      57.469  89.575  26.280  1.00  0.00
ATOM     11  CB  ALA     2      58.126  90.862  25.989  1.00  0.00
ATOM     12  C   ALA     2      56.830  89.520  27.686  1.00  0.00
ATOM     13  O   ALA     2      55.609  89.660  27.788  1.00  0.00
ATOM     14  N   HIE     3      57.681  89.460  28.734  1.00  0.00
ATOM     15  CA  HIE     3      57.254  89.233  30.081  1.00  0.00
ATOM     16  CB  HIE     3      58.164  88.326  30.862  1.00  0.00
ATOM     17  CG  HIE     3      59.525  89.073  30.996  1.00  0.00
ATOM     18  ND1 HIE     3      59.771  90.027  32.000  1.00  0.00
ATOM     19  CE1 HIE     3      60.986  90.554  31.664  1.00  0.00
ATOM     20  NE2 HIE     3      61.559  89.836  30.712  1.00  0.00
ATOM     21  CD2 HIE     3      60.627  89.001  30.170  1.00  0.00
ATOM     22  C   HIE     3      56.960  90.513  30.853  1.00  0.00
ATOM     23  O   HIE     3      56.200  90.464  31.818  1.00  0.00
ATOM     24  N   LYS     4      57.513  91.673  30.392  1.00  0.00
ATOM     25  CA  LYS     4      57.159  93.021  30.999  1.00  0.00
ATOM     26  CB  LYS     4      55.713  93.427  30.665  1.00  0.00
ATOM     27  CG  LYS     4      55.448  93.963  29.281  1.00  0.00
ATOM     28  CD  LYS     4      53.955  94.339  29.151  1.00  0.00
ATOM     29  CE  LYS     4      53.420  94.627  27.745  1.00  0.00
ATOM     30  NZ  LYS     4      52.029  94.908  27.934  1.00  0.00
ATOM     31  C   LYS     4      57.435  93.046  32.431  1.00  0.00
ATOM     32  O   LYS     4      56.583  93.287  33.304  1.00  0.00
ATOM     33  N   SER     5      58.729  92.770  32.782  1.00  0.00
ATOM     34  CA  SER     5      59.285  92.752  34.145  1.00  0.00
ATOM     35  CB  SER     5      59.581  94.182  34.698  1.00  0.00
ATOM     36  OG  SER     5      60.384  94.917  33.809  1.00  0.00
ATOM     37  C   SER     5      58.524  91.836  35.154  1.00  0.00
ATOM     38  O   SER     5      58.073  92.154  36.203  1.00  0.00
ATOM     39  N   GLU     6      58.475  90.548  34.767  1.00  0.00
ATOM     40  CA  GLU     6      57.970  89.509  35.651  1.00  0.00
ATOM     41  CB  GLU     6      58.451  88.131  35.106  1.00  0.00
ATOM     42  CG  GLU     6      57.813  86.838  35.682  1.00  0.00
ATOM     43  CD  GLU     6      58.424  85.475  35.145  1.00  0.00
ATOM     44  OE1 GLU     6      57.719  84.418  35.107  1.00  0.00
ATOM     45  OE2 GLU     6      59.571  85.585  34.718  1.00  0.00
ATOM     46  C   GLU     6      58.313  89.580  37.056  1.00  0.00
ATOM     47  O   GLU     6      57.464  89.339  37.909  1.00  0.00
ATOM     48  N   VAL     7      59.553  89.910  37.453  1.00  0.00
ATOM     49  CA  VAL     7      60.075  90.156  38.790  1.00  0.00
ATOM     50  CB  VAL     7      61.584  90.341  38.671  1.00  0.00
ATOM     51  CG1 VAL     7      61.879  91.699  38.083  1.00  0.00
ATOM     52  CG2 VAL     7      62.335  90.189  39.999  1.00  0.00
ATOM     53  C   VAL     7      59.278  91.273  39.489  1.00  0.00
ATOM     54  O   VAL     7      58.851  91.021  40.631  1.00  0.00
ATOM     55  N   ALA     8      58.855  92.380  38.818  1.00  0.00
ATOM     56  CA  ALA     8      58.047  93.490  39.347  1.00  0.00
ATOM     57  CB  ALA     8      58.047  94.632  38.364  1.00  0.00
ATOM     58  C   ALA     8      56.608  92.979  39.761  1.00  0.00
ATOM     59  O   ALA     8      56.040  93.330  40.783  1.00  0.00
ATOM     60  N   HID     9      56.018  92.106  38.888  1.00  0.00
ATOM     61  CA  HID     9      54.696  91.479  39.108  1.00  0.00
ATOM     62  CB  HID     9      54.193  90.887  37.771  1.00  0.00
ATOM     63  CG  HID     9      52.689  91.143  37.561  1.00  0.00
ATOM     64  ND1 HID     9      52.126  92.413  37.253  1.00  0.00
ATOM     65  CE1 HID     9      50.841  92.227  37.020  1.00  0.00
ATOM     66  NE2 HID     9      50.443  90.963  37.149  1.00  0.00
ATOM     67  CD2 HID     9      51.624  90.213  37.536  1.00  0.00
ATOM     68  C   HID     9      54.739  90.370  40.202  1.00  0.00
ATOM     69  O   HID     9      53.692  90.066  40.801  1.00  0.00
ATOM     70  N   ARG    10      55.904  89.887  40.583  1.00  0.00
ATOM     71  CA  ARG    10      56.044  89.071  41.796  1.00  0.00
ATOM     72  CB  ARG    10      57.002  87.957  41.303  1.00  0.00
ATOM     73  CG  ARG    10      56.374  86.988  40.210  1.00  0.00
ATOM     74  CD  ARG    10      54.902  86.552  40.414  1.00  0.00
ATOM     75  NE  ARG    10      54.728  85.143  40.069  1.00  0.00
ATOM     76  CZ  ARG    10      54.095  84.230  40.800  1.00  0.00
ATOM     77  NH1 ARG    10      54.011  83.038  40.279  1.00  0.00
ATOM     78  NH2 ARG    10      53.426  84.469  41.891  1.00  0.00
ATOM     79  C   ARG    10      56.597  89.821  43.049  1.00  0.00
ATOM     80  O   ARG    10      56.631  89.263  44.108  1.00  0.00
ATOM     81  N   PHE    11      56.844  91.125  42.835  1.00  0.00
ATOM     82  CA  PHE    11      57.304  92.093  43.863  1.00  0.00
ATOM     83  CB  PHE    11      58.305  92.987  43.186  1.00  0.00
ATOM     84  CG  PHE    11      59.085  93.976  44.002  1.00  0.00
ATOM     85  CD1 PHE    11      58.558  95.260  44.270  1.00  0.00
ATOM     86  CE1 PHE    11      59.328  96.185  44.993  1.00  0.00
ATOM     87  CZ  PHE    11      60.625  95.852  45.386  1.00  0.00
ATOM     88  CE2 PHE    11      61.076  94.561  45.224  1.00  0.00
ATOM     89  CD2 PHE    11      60.331  93.670  44.459  1.00  0.00
ATOM     90  C   PHE    11      56.145  92.963  44.427  1.00  0.00
ATOM     91  O   PHE    11      56.191  93.310  45.606  1.00  0.00
ATOM     92  N   LYS    12      55.128  93.332  43.557  1.00  0.00
ATOM     93  CA  LYS    12      54.021  94.202  43.992  1.00  0.00
ATOM     94  CB  LYS    12      52.911  94.535  42.952  1.00  0.00
ATOM     95  CG  LYS    12      52.498  93.275  42.215  1.00  0.00
ATOM     96  CD  LYS    12      51.563  93.443  41.045  1.00  0.00
ATOM     97  CE  LYS    12      50.852  92.158  40.534  1.00  0.00
ATOM     98  NZ  LYS    12      49.717  91.734  41.437  1.00  0.00
ATOM     99  C   LYS    12      53.261  93.723  45.306  1.00  0.00
ATOM    100  O   LYS    12      53.112  94.573  46.204  1.00  0.00
ATOM    101  N   ASP    13      52.900  92.487  45.430  1.00  0.00
ATOM    102  CA  ASP    13      52.197  91.881  46.554  1.00  0.00
ATOM    103  CB  ASP    13      50.955  91.121  46.170  1.00  0.00
ATOM    104  CG  ASP    13      49.969  91.717  45.168  1.00  0.00
ATOM    105  OD1 ASP    13      49.305  92.718  45.519  1.00  0.00
ATOM    106  OD2 ASP    13      49.591  91.068  44.164  1.00  0.00
ATOM    107  C   ASP    13      53.078  90.930  47.411  1.00  0.00
ATOM    108  O   ASP    13      52.686  90.441  48.465  1.00  0.00
ATOM    109  N   LEU    14      54.360  90.765  47.033  1.00  0.00
ATOM    110  CA  LEU    14      55.365  90.119  47.959  1.00  0.00
ATOM    111  CB  LEU    14      56.436  89.301  47.182  1.00  0.00
ATOM    112  CG  LEU    14      57.405  88.377  48.033  1.00  0.00
ATOM    113  CD1 LEU    14      56.721  87.523  49.197  1.00  0.00
ATOM    114  CD2 LEU    14      58.126  87.394  47.033  1.00  0.00
ATOM    115  C   LEU    14      55.932  91.150  48.896  1.00  0.00
ATOM    116  O   LEU    14      55.968  90.852  50.080  1.00  0.00
ATOM    117  N   GLY    15      56.277  92.346  48.362  1.00  0.00
ATOM    118  CA  GLY    15      56.846  93.487  49.057  1.00  0.00
ATOM    119  C   GLY    15      58.351  93.292  49.295  1.00  0.00
ATOM    120  O   GLY    15      58.841  92.174  49.553  1.00  0.00
ATOM    121  N   GLU    16      59.191  94.377  49.311  1.00  0.00
ATOM    122  CA  GLU    16      60.670  94.304  49.264  1.00  0.00
ATOM    123  CB  GLU    16      61.055  95.809  49.138  1.00  0.00
ATOM    124  CG  GLU    16      62.543  96.119  49.243  1.00  0.00
ATOM    125  CD  GLU    16      62.872  97.568  49.459  1.00  0.00
ATOM    126  OE1 GLU    16      63.903  98.082  48.959  1.00  0.00
ATOM    127  OE2 GLU    16      61.987  98.217  50.024  1.00  0.00
ATOM    128  C   GLU    16      61.347  93.582  50.445  1.00  0.00
ATOM    129  O   GLU    16      62.229  92.755  50.144  1.00  0.00
ATOM    130  N   GLU    17      60.944  93.716  51.721  1.00  0.00
ATOM    131  CA  GLU    17      61.493  92.964  52.818  1.00  0.00
ATOM    132  CB  GLU    17      60.944  93.518  54.133  1.00  0.00
ATOM    133  CG  GLU    17      59.545  93.106  54.396  1.00  0.00
ATOM    134  CD  GLU    17      58.808  94.166  55.299  1.00  0.00
ATOM    135  OE1 GLU    17      59.434  94.468  56.374  1.00  0.00
ATOM    136  OE2 GLU    17      57.799  94.838  54.913  1.00  0.00
ATOM    137  C   GLU    17      61.390  91.419  52.669  1.00  0.00
ATOM    138  O   GLU    17      62.331  90.664  52.892  1.00  0.00
ATOM    139  N   ASN    18      60.183  91.003  52.224  1.00  0.00
ATOM    140  CA  ASN    18      59.893  89.603  52.010  1.00  0.00
ATOM    141  CB  ASN    18      58.358  89.463  51.800  1.00  0.00
ATOM    142  CG  ASN    18      57.581  89.833  53.053  1.00  0.00
ATOM    143  OD1 ASN    18      57.899  89.543  54.229  1.00  0.00
ATOM    144  ND2 ASN    18      56.467  90.519  52.859  1.00  0.00
ATOM    145  C   ASN    18      60.667  89.042  50.755  1.00  0.00
ATOM    146  O   ASN    18      61.029  87.869  50.721  1.00  0.00
ATOM    147  N   PHE    19      60.796  89.869  49.725  1.00  0.00
ATOM    148  CA  PHE    19      61.516  89.680  48.444  1.00  0.00
ATOM    149  CB  PHE    19      61.362  90.844  47.458  1.00  0.00
ATOM    150  CG  PHE    19      61.984  90.523  46.117  1.00  0.00
ATOM    151  CD1 PHE    19      61.280  89.700  45.290  1.00  0.00
ATOM    152  CE1 PHE    19      61.794  89.447  44.054  1.00  0.00
ATOM    153  CZ  PHE    19      63.034  89.898  43.609  1.00  0.00
ATOM    154  CE2 PHE    19      63.755  90.789  44.460  1.00  0.00
ATOM    155  CD2 PHE    19      63.284  91.035  45.743  1.00  0.00
ATOM    156  C   PHE    19      63.054  89.531  48.707  1.00  0.00
ATOM    157  O   PHE    19      63.641  88.566  48.229  1.00  0.00
ATOM    158  N   LYS    20      63.590  90.391  49.555  1.00  0.00
ATOM    159  CA  LYS    20      64.935  90.323  50.005  1.00  0.00
ATOM    160  CB  LYS    20      65.361  91.694  50.588  1.00  0.00
ATOM    161  CG  LYS    20      66.818  91.782  51.061  1.00  0.00
ATOM    162  CD  LYS    20      67.410  93.206  51.349  1.00  0.00
ATOM    163  CE  LYS    20      67.500  94.054  50.142  1.00  0.00
ATOM    164  NZ  LYS    20      68.156  95.365  50.430  1.00  0.00
ATOM    165  C   LYS    20      65.282  89.223  50.964  1.00  0.00
ATOM    166  O   LYS    20      66.373  88.533  50.830  1.00  0.00
ATOM    167  N   ALA    21      64.510  88.921  51.954  1.00  0.00
ATOM    168  CA  ALA    21      64.688  87.716  52.743  1.00  0.00
ATOM    169  CB  ALA    21      63.574  87.674  53.823  1.00  0.00
ATOM    170  C   ALA    21      64.514  86.452  51.888  1.00  0.00
ATOM    171  O   ALA    21      65.282  85.553  52.086  1.00  0.00
ATOM    172  N   LEU    22      63.500  86.301  51.002  1.00  0.00
ATOM    173  CA  LEU    22      63.373  85.096  50.225  1.00  0.00
ATOM    174  CB  LEU    22      62.048  84.968  49.475  1.00  0.00
ATOM    175  CG  LEU    22      60.807  84.474  50.328  1.00  0.00
ATOM    176  CD1 LEU    22      59.476  84.814  49.644  1.00  0.00
ATOM    177  CD2 LEU    22      60.991  82.922  50.583  1.00  0.00
ATOM    178  C   LEU    22      64.503  84.793  49.198  1.00  0.00
ATOM    179  O   LEU    22      64.843  83.615  48.959  1.00  0.00
ATOM    180  N   VAL    23      65.043  85.841  48.663  1.00  0.00
ATOM    181  CA  VAL    23      66.321  85.657  47.861  1.00  0.00
ATOM    182  CB  VAL    23      66.718  86.719  46.785  1.00  0.00
ATOM    183  CG1 VAL    23      65.646  86.706  45.697  1.00  0.00
ATOM    184  CG2 VAL    23      66.901  88.123  47.427  1.00  0.00
ATOM    185  C   VAL    23      67.560  85.366  48.726  1.00  0.00
ATOM    186  O   VAL    23      68.331  84.576  48.246  1.00  0.00
ATOM    187  N   LEU    24      67.729  85.911  49.914  1.00  0.00
ATOM    188  CA  LEU    24      68.751  85.455  50.923  1.00  0.00
ATOM    189  CB  LEU    24      68.695  86.361  52.162  1.00  0.00
ATOM    190  CG  LEU    24      69.795  86.247  53.266  1.00  0.00
ATOM    191  CD1 LEU    24      69.365  85.153  54.356  1.00  0.00
ATOM    192  CD2 LEU    24      71.214  86.059  52.593  1.00  0.00
ATOM    193  C   LEU    24      68.657  83.960  51.283  1.00  0.00
ATOM    194  O   LEU    24      69.635  83.229  51.326  1.00  0.00
ATOM    195  N   ILE    25      67.451  83.508  51.362  1.00  0.00
ATOM    196  CA  ILE    25      67.178  82.089  51.416  1.00  0.00
ATOM    197  CB  ILE    25      65.660  81.954  51.724  1.00  0.00
ATOM    198  CG2 ILE    25      65.246  80.482  51.596  1.00  0.00
ATOM    199  CG1 ILE    25      65.520  82.437  53.200  1.00  0.00
ATOM    200  CD1 ILE    25      64.000  82.641  53.687  1.00  0.00
ATOM    201  C   ILE    25      67.469  81.389  50.072  1.00  0.00
ATOM    202  O   ILE    25      68.212  80.418  50.100  1.00  0.00
ATOM    203  N   ALA    26      66.982  81.918  48.884  1.00  0.00
ATOM    204  CA  ALA    26      67.295  81.258  47.580  1.00  0.00
ATOM    205  CB  ALA    26      66.731  82.032  46.473  1.00  0.00
ATOM    206  C   ALA    26      68.784  81.016  47.298  1.00  0.00
ATOM    207  O   ALA    26      69.177  79.972  46.846  1.00  0.00
ATOM    208  N   PHE    27      69.632  81.984  47.638  1.00  0.00
ATOM    209  CA  PHE    27      71.089  81.887  47.344  1.00  0.00
ATOM    210  CB  PHE    27      71.575  83.337  47.231  1.00  0.00
ATOM    211  CG  PHE    27      71.037  84.161  46.051  1.00  0.00
ATOM    212  CD1 PHE    27      70.438  85.383  46.171  1.00  0.00
ATOM    213  CE1 PHE    27      69.921  86.043  45.044  1.00  0.00
ATOM    214  CZ  PHE    27      70.012  85.376  43.789  1.00  0.00
ATOM    215  CE2 PHE    27      70.680  84.150  43.565  1.00  0.00
ATOM    216  CD2 PHE    27      71.177  83.554  44.735  1.00  0.00
ATOM    217  C   PHE    27      71.846  81.098  48.428  1.00  0.00
ATOM    218  O   PHE    27      72.780  80.371  48.118  1.00  0.00
ATOM    219  N   ALA    28      71.385  81.086  49.686  1.00  0.00
ATOM    220  CA  ALA    28      72.023  80.315  50.814  1.00  0.00
ATOM    221  CB  ALA    28      71.967  81.120  52.073  1.00  0.00
ATOM    222  C   ALA    28      71.515  78.851  50.990  1.00  0.00
ATOM    223  O   ALA    28      72.232  78.028  51.567  1.00  0.00
ATOM    224  N   GLN    29      70.324  78.459  50.449  1.00  0.00
ATOM    225  CA  GLN    29      70.047  77.044  50.228  1.00  0.00
ATOM    226  CB  GLN    29      68.502  76.794  50.183  1.00  0.00
ATOM    227  CG  GLN    29      67.773  77.015  51.474  1.00  0.00
ATOM    228  CD  GLN    29      66.277  76.790  51.391  1.00  0.00
ATOM    229  OE1 GLN    29      65.649  77.176  50.398  1.00  0.00
ATOM    230  NE2 GLN    29      65.694  76.256  52.429  1.00  0.00
ATOM    231  C   GLN    29      70.727  76.450  49.009  1.00  0.00
ATOM    232  O   GLN    29      71.165  75.360  49.093  1.00  0.00
ATOM    233  N   TYR    30      70.945  77.175  47.862  1.00  0.00
ATOM    234  CA  TYR    30      71.668  76.593  46.725  1.00  0.00
ATOM    235  CB  TYR    30      71.200  77.346  45.498  1.00  0.00
ATOM    236  CG  TYR    30      69.891  76.835  44.859  1.00  0.00
ATOM    237  CD1 TYR    30      69.939  76.202  43.633  1.00  0.00
ATOM    238  CE1 TYR    30      68.777  75.830  42.996  1.00  0.00
ATOM    239  CZ  TYR    30      67.488  75.990  43.593  1.00  0.00
ATOM    240  OH  TYR    30      66.351  75.797  42.898  1.00  0.00
ATOM    241  CE2 TYR    30      67.476  76.634  44.785  1.00  0.00
ATOM    242  CD2 TYR    30      68.631  76.889  45.498  1.00  0.00
ATOM    243  C   TYR    30      73.149  76.585  46.874  1.00  0.00
ATOM    244  O   TYR    30      73.736  75.588  46.423  1.00  0.00
ATOM    245  N   LEU    31      73.820  77.597  47.440  1.00  0.00
ATOM    246  CA  LEU    31      75.249  77.870  47.650  1.00  0.00
ATOM    247  CB  LEU    31      75.776  79.219  47.158  1.00  0.00
ATOM    248  CG  LEU    31      75.545  79.456  45.699  1.00  0.00
ATOM    249  CD1 LEU    31      76.172  80.815  45.306  1.00  0.00
ATOM    250  CD2 LEU    31      75.952  78.286  44.745  1.00  0.00
ATOM    251  C   LEU    31      75.640  77.700  49.116  1.00  0.00
ATOM    252  O   LEU    31      76.207  78.557  49.812  1.00  0.00
ATOM    253  N   GLN    32      75.361  76.481  49.672  1.00  0.00
ATOM    254  CA  GLN    32      75.509  76.237  51.131  1.00  0.00
ATOM    255  CB  GLN    32      74.934  74.870  51.418  1.00  0.00
ATOM    256  CG  GLN    32      73.657  74.494  50.804  1.00  0.00
ATOM    257  CD  GLN    32      73.297  73.113  51.186  1.00  0.00
ATOM    258  OE1 GLN    32      73.483  72.238  50.375  1.00  0.00
ATOM    259  NE2 GLN    32      72.862  72.731  52.346  1.00  0.00
ATOM    260  C   GLN    32      76.924  76.475  51.780  1.00  0.00
ATOM    261  O   GLN    32      77.066  76.858  52.969  1.00  0.00
ATOM    262  N   GLN    33      77.999  76.194  51.045  1.00  0.00
ATOM    263  CA  GLN    33      79.387  76.437  51.407  1.00  0.00
ATOM    264  CB  GLN    33      80.318  75.384  50.797  1.00  0.00
ATOM    265  CG  GLN    33      80.007  73.931  51.275  1.00  0.00
ATOM    266  CD  GLN    33      78.852  73.251  50.522  1.00  0.00
ATOM    267  OE1 GLN    33      78.222  73.772  49.641  1.00  0.00
ATOM    268  NE2 GLN    33      78.445  72.091  50.934  1.00  0.00
ATOM    269  C   GLN    33      79.845  77.859  51.068  1.00  0.00
ATOM    270  O   GLN    33      80.819  78.355  51.626  1.00  0.00
ATOM    271  N   CYS    34      79.077  78.714  50.373  1.00  0.00
ATOM    272  CA  CYS    34      79.440  80.138  50.126  1.00  0.00
ATOM    273  CB  CYS    34      78.925  80.609  48.757  1.00  0.00
ATOM    274  SG  CYS    34      79.384  79.519  47.403  1.00  0.00
ATOM    275  C   CYS    34      78.990  81.087  51.279  1.00  0.00
ATOM    276  O   CYS    34      78.093  80.763  52.080  1.00  0.00
ATOM    277  N   PRO    35      79.724  82.208  51.538  1.00  0.00
ATOM    278  CD  PRO    35      80.793  82.722  50.672  1.00  0.00
ATOM    279  CG  PRO    35      81.692  83.443  51.630  1.00  0.00
ATOM    280  CB  PRO    35      80.780  84.149  52.583  1.00  0.00
ATOM    281  CA  PRO    35      79.526  83.180  52.620  1.00  0.00
ATOM    282  C   PRO    35      78.270  84.092  52.563  1.00  0.00
ATOM    283  O   PRO    35      77.643  84.177  51.495  1.00  0.00
ATOM    284  N   PHE    36      77.954  84.775  53.647  1.00  0.00
ATOM    285  CA  PHE    36      76.842  85.734  53.826  1.00  0.00
ATOM    286  CB  PHE    36      76.469  86.017  55.295  1.00  0.00
ATOM    287  CG  PHE    36      75.379  87.007  55.575  1.00  0.00
ATOM    288  CD1 PHE    36      74.045  86.655  55.292  1.00  0.00
ATOM    289  CE1 PHE    36      72.978  87.513  55.773  1.00  0.00
ATOM    290  CZ  PHE    36      73.398  88.711  56.387  1.00  0.00
ATOM    291  CE2 PHE    36      74.697  89.095  56.546  1.00  0.00
ATOM    292  CD2 PHE    36      75.672  88.215  56.171  1.00  0.00
ATOM    293  C   PHE    36      77.369  87.071  53.189  1.00  0.00
ATOM    294  O   PHE    36      76.605  87.578  52.390  1.00  0.00
ATOM    295  N   GLU    37      78.580  87.530  53.324  1.00  0.00
ATOM    296  CA  GLU    37      78.895  88.783  52.678  1.00  0.00
ATOM    297  CB  GLU    37      80.211  89.393  53.317  1.00  0.00
ATOM    298  CG  GLU    37      79.896  89.876  54.785  1.00  0.00
ATOM    299  CD  GLU    37      79.872  88.739  55.904  1.00  0.00
ATOM    300  OE1 GLU    37      79.958  87.539  55.647  1.00  0.00
ATOM    301  OE2 GLU    37      79.889  89.195  57.053  1.00  0.00
ATOM    302  C   GLU    37      79.106  88.693  51.167  1.00  0.00
ATOM    303  O   GLU    37      79.015  89.773  50.611  1.00  0.00
ATOM    304  N   ASP    38      79.244  87.467  50.569  1.00  0.00
ATOM    305  CA  ASP    38      79.080  87.219  49.123  1.00  0.00
ATOM    306  CB  ASP    38      79.652  85.825  48.757  1.00  0.00
ATOM    307  CG  ASP    38      81.195  85.736  48.515  1.00  0.00
ATOM    308  OD1 ASP    38      81.731  84.753  48.011  1.00  0.00
ATOM    309  OD2 ASP    38      81.950  86.706  48.678  1.00  0.00
ATOM    310  C   ASP    38      77.576  87.223  48.750  1.00  0.00
ATOM    311  O   ASP    38      77.222  87.388  47.609  1.00  0.00
ATOM    312  N   HIE    39      76.610  87.069  49.708  1.00  0.00
ATOM    313  CA  HIE    39      75.165  87.140  49.428  1.00  0.00
ATOM    314  CB  HIE    39      74.404  86.210  50.353  1.00  0.00
ATOM    315  CG  HIE    39      74.508  84.763  50.173  1.00  0.00
ATOM    316  ND1 HIE    39      74.571  84.155  48.913  1.00  0.00
ATOM    317  CE1 HIE    39      74.598  82.848  49.193  1.00  0.00
ATOM    318  NE2 HIE    39      74.526  82.624  50.553  1.00  0.00
ATOM    319  CD2 HIE    39      74.559  83.854  51.175  1.00  0.00
ATOM    320  C   HIE    39      74.610  88.554  49.570  1.00  0.00
ATOM    321  O   HIE    39      73.562  88.849  48.969  1.00  0.00
ATOM    322  N   VAL    40      75.208  89.478  50.449  1.00  0.00
ATOM    323  CA  VAL    40      74.683  90.782  50.836  1.00  0.00
ATOM    324  CB  VAL    40      75.486  91.458  51.996  1.00  0.00
ATOM    325  CG1 VAL    40      75.039  92.902  52.240  1.00  0.00
ATOM    326  CG2 VAL    40      75.273  90.800  53.346  1.00  0.00
ATOM    327  C   VAL    40      74.595  91.710  49.636  1.00  0.00
ATOM    328  O   VAL    40      73.511  91.986  49.229  1.00  0.00
ATOM    329  N   LYS    41      75.671  91.914  48.876  1.00  0.00
ATOM    330  CA  LYS    41      75.587  92.563  47.545  1.00  0.00
ATOM    331  CB  LYS    41      76.975  92.803  46.996  1.00  0.00
ATOM    332  CG  LYS    41      77.905  93.634  47.946  1.00  0.00
ATOM    333  CD  LYS    41      79.140  94.149  47.216  1.00  0.00
ATOM    334  CE  LYS    41      80.115  92.987  46.877  1.00  0.00
ATOM    335  NZ  LYS    41      80.563  93.003  45.495  1.00  0.00
ATOM    336  C   LYS    41      74.814  91.853  46.447  1.00  0.00
ATOM    337  O   LYS    41      74.283  92.581  45.627  1.00  0.00
ATOM    338  N   LEU    42      74.573  90.514  46.419  1.00  0.00
ATOM    339  CA  LEU    42      73.490  89.886  45.675  1.00  0.00
ATOM    340  CB  LEU    42      73.540  88.368  45.768  1.00  0.00
ATOM    341  CG  LEU    42      74.694  87.637  45.092  1.00  0.00
ATOM    342  CD1 LEU    42      74.504  86.082  45.164  1.00  0.00
ATOM    343  CD2 LEU    42      74.778  87.950  43.601  1.00  0.00
ATOM    344  C   LEU    42      72.059  90.380  46.085  1.00  0.00
ATOM    345  O   LEU    42      71.374  90.998  45.273  1.00  0.00
ATOM    346  N   VAL    43      71.627  90.164  47.340  1.00  0.00
ATOM    347  CA  VAL    43      70.199  90.400  47.697  1.00  0.00
ATOM    348  CB  VAL    43      69.771  89.918  49.103  1.00  0.00
ATOM    349  CG1 VAL    43      70.275  88.471  49.454  1.00  0.00
ATOM    350  CG2 VAL    43      70.315  90.703  50.343  1.00  0.00
ATOM    351  C   VAL    43      69.891  91.907  47.653  1.00  0.00
ATOM    352  O   VAL    43      68.816  92.284  47.254  1.00  0.00
ATOM    353  N   ASN    44      70.915  92.745  47.973  1.00  0.00
ATOM    354  CA  ASN    44      70.913  94.164  47.884  1.00  0.00
ATOM    355  CB  ASN    44      72.075  94.813  48.591  1.00  0.00
ATOM    356  CG  ASN    44      72.006  94.563  50.140  1.00  0.00
ATOM    357  OD1 ASN    44      71.107  94.022  50.761  1.00  0.00
ATOM    358  ND2 ASN    44      72.979  94.952  50.882  1.00  0.00
ATOM    359  C   ASN    44      70.725  94.639  46.424  1.00  0.00
ATOM    360  O   ASN    44      69.673  95.315  46.123  1.00  0.00
ATOM    361  N   GLU    45      71.665  94.536  45.456  1.00  0.00
ATOM    362  CA  GLU    45      71.572  95.043  44.111  1.00  0.00
ATOM    363  CB  GLU    45      72.953  94.880  43.490  1.00  0.00
ATOM    364  CG  GLU    45      74.083  95.771  44.043  1.00  0.00
ATOM    365  CD  GLU    45      75.349  95.783  43.130  1.00  0.00
ATOM    366  OE1 GLU    45      75.370  96.580  42.144  1.00  0.00
ATOM    367  OE2 GLU    45      76.314  95.040  43.363  1.00  0.00
ATOM    368  C   GLU    45      70.566  94.371  43.241  1.00  0.00
ATOM    369  O   GLU    45      69.951  95.079  42.433  1.00  0.00
ATOM    370  N   VAL    46      70.172  93.107  43.473  1.00  0.00
ATOM    371  CA  VAL    46      68.993  92.463  42.952  1.00  0.00
ATOM    372  CB  VAL    46      69.215  90.915  42.987  1.00  0.00
ATOM    373  CG1 VAL    46      68.363  90.142  43.965  1.00  0.00
ATOM    374  CG2 VAL    46      68.761  90.363  41.603  1.00  0.00
ATOM    375  C   VAL    46      67.683  93.055  43.430  1.00  0.00
ATOM    376  O   VAL    46      66.773  93.314  42.630  1.00  0.00
ATOM    377  N   THR    47      67.461  93.317  44.745  1.00  0.00
ATOM    378  CA  THR    47      66.273  94.029  45.222  1.00  0.00
ATOM    379  CB  THR    47      66.271  94.142  46.825  1.00  0.00
ATOM    380  CG2 THR    47      64.962  94.899  47.290  1.00  0.00
ATOM    381  OG1 THR    47      66.152  92.813  47.396  1.00  0.00
ATOM    382  C   THR    47      66.254  95.450  44.598  1.00  0.00
ATOM    383  O   THR    47      65.183  95.841  44.040  1.00  0.00
ATOM    384  N   GLU    48      67.413  96.137  44.424  1.00  0.00
ATOM    385  CA  GLU    48      67.417  97.352  43.709  1.00  0.00
ATOM    386  CB  GLU    48      68.817  97.977  43.746  1.00  0.00
ATOM    387  CG  GLU    48      69.158  98.571  45.181  1.00  0.00
ATOM    388  CD  GLU    48      68.325  99.769  45.529  1.00  0.00
ATOM    389  OE1 GLU    48      68.835 100.997  45.475  1.00  0.00
ATOM    390  OE2 GLU    48      67.113  99.707  45.847  1.00  0.00
ATOM    391  C   GLU    48      67.009  97.231  42.281  1.00  0.00
ATOM    392  O   GLU    48      66.241  98.097  41.804  1.00  0.00
ATOM    393  N   PHE    49      67.461  96.229  41.574  1.00  0.00
ATOM    394  CA  PHE    49      67.087  96.082  40.115  1.00  0.00
ATOM    395  CB  PHE    49      67.876  94.913  39.616  1.00  0.00
ATOM    396  CG  PHE    49      68.033  94.999  38.120  1.00  0.00
ATOM    397  CD1 PHE    49      67.073  94.418  37.273  1.00  0.00
ATOM    398  CE1 PHE    49      67.278  94.453  35.906  1.00  0.00
ATOM    399  CZ  PHE    49      68.444  94.972  35.442  1.00  0.00
ATOM    400  CE2 PHE    49      69.340  95.676  36.203  1.00  0.00
ATOM    401  CD2 PHE    49      69.130  95.748  37.606  1.00  0.00
ATOM    402  C   PHE    49      65.554  95.876  40.033  1.00  0.00
ATOM    403  O   PHE    49      64.918  96.634  39.342  1.00  0.00
ATOM    404  N   ALA    50      64.982  94.912  40.847  1.00  0.00
ATOM    405  CA  ALA    50      63.514  94.825  40.843  1.00  0.00
ATOM    406  CB  ALA    50      63.031  93.523  41.527  1.00  0.00
ATOM    407  C   ALA    50      62.742  96.130  41.352  1.00  0.00
ATOM    408  O   ALA    50      61.623  96.336  40.809  1.00  0.00
ATOM    409  N   LYS    51      63.330  96.941  42.186  1.00  0.00
ATOM    410  CA  LYS    51      62.708  98.104  42.749  1.00  0.00
ATOM    411  CB  LYS    51      63.360  98.431  44.104  1.00  0.00
ATOM    412  CG  LYS    51      62.700  99.689  44.758  1.00  0.00
ATOM    413  CD  LYS    51      63.283  99.805  46.180  1.00  0.00
ATOM    414  CE  LYS    51      62.473 100.646  47.229  1.00  0.00
ATOM    415  NZ  LYS    51      63.100 100.724  48.561  1.00  0.00
ATOM    416  C   LYS    51      62.657  99.215  41.714  1.00  0.00
ATOM    417  O   LYS    51      61.614  99.896  41.585  1.00  0.00
ATOM    418  N   THR    52      63.696  99.319  40.875  1.00  0.00
ATOM    419  CA  THR    52      63.607 100.159  39.638  1.00  0.00
ATOM    420  CB  THR    52      64.951 100.400  39.022  1.00  0.00
ATOM    421  CG2 THR    52      65.694 101.341  39.930  1.00  0.00
ATOM    422  OG1 THR    52      65.742  99.307  38.901  1.00  0.00
ATOM    423  C   THR    52      62.715  99.568  38.675  1.00  0.00
ATOM    424  O   THR    52      62.116 100.314  37.910  1.00  0.00
ATOM    425  N   CYX    53      62.569  98.198  38.608  1.00  0.00
ATOM    426  CA  CYX    53      61.630  97.701  37.574  1.00  0.00
ATOM    427  CB  CYX    53      61.972  96.227  37.213  1.00  0.00
ATOM    428  SG  CYX    53      63.514  96.092  36.356  1.00  0.00
ATOM    429  C   CYX    53      60.156  98.000  37.984  1.00  0.00
ATOM    430  O   CYX    53      59.311  98.053  37.074  1.00  0.00
ATOM    431  N   VAL    54      59.876  98.290  39.267  1.00  0.00
ATOM    432  CA  VAL    54      58.635  98.920  39.662  1.00  0.00
ATOM    433  CB  VAL    54      58.148  98.447  41.044  1.00  0.00
ATOM    434  CG1 VAL    54      58.379  99.341  42.208  1.00  0.00
ATOM    435  CG2 VAL    54      56.688  98.062  41.028  1.00  0.00
ATOM    436  C   VAL    54      58.545 100.448  39.478  1.00  0.00
ATOM    437  O   VAL    54      57.494 100.981  39.057  1.00  0.00
ATOM    438  N   ALA    55      59.604 101.148  39.866  1.00  0.00
ATOM    439  CA  ALA    55      59.581 102.646  39.831  1.00  0.00
ATOM    440  CB  ALA    55      60.706 103.185  40.736  1.00  0.00
ATOM    441  C   ALA    55      59.661 103.248  38.440  1.00  0.00
ATOM    442  O   ALA    55      59.286 104.397  38.283  1.00  0.00
ATOM    443  N   ASP    56      60.061 102.520  37.403  1.00  0.00
ATOM    444  CA  ASP    56      60.151 103.018  36.025  1.00  0.00
ATOM    445  CB  ASP    56      61.094 102.163  35.142  1.00  0.00
ATOM    446  CG  ASP    56      61.399 102.735  33.717  1.00  0.00
ATOM    447  OD1 ASP    56      61.675 103.980  33.610  1.00  0.00
ATOM    448  OD2 ASP    56      61.110 102.080  32.676  1.00  0.00
ATOM    449  C   ASP    56      58.829 103.340  35.273  1.00  0.00
ATOM    450  O   ASP    56      57.700 102.972  35.687  1.00  0.00
ATOM    451  N   GLU    57      58.896 104.220  34.286  1.00  0.00
ATOM    452  CA  GLU    57      57.855 104.745  33.437  1.00  0.00
ATOM    453  CB  GLU    57      58.421 106.014  32.758  1.00  0.00
ATOM    454  CG  GLU    57      57.354 106.807  31.903  1.00  0.00
ATOM    455  CD  GLU    57      56.626 107.755  32.878  1.00  0.00
ATOM    456  OE1 GLU    57      57.084 108.918  33.062  1.00  0.00
ATOM    457  OE2 GLU    57      55.584 107.444  33.471  1.00  0.00
ATOM    458  C   GLU    57      57.336 103.704  32.424  1.00  0.00
ATOM    459  O   GLU    57      56.148 103.620  32.139  1.00  0.00
ATOM    460  N   SER    58      58.280 102.832  31.998  1.00  0.00
ATOM    461  CA  SER    58      57.975 101.616  31.265  1.00  0.00
ATOM    462  CB  SER    58      59.062 101.227  30.254  1.00  0.00
ATOM    463  OG  SER    58      60.070 100.491  30.853  1.00  0.00
ATOM    464  C   SER    58      57.684 100.415  32.182  1.00  0.00
ATOM    465  O   SER    58      57.966 100.372  33.373  1.00  0.00
ATOM    466  N   ALA    59      57.097  99.348  31.591  1.00  0.00
ATOM    467  CA  ALA    59      57.020  98.029  32.211  1.00  0.00
ATOM    468  CB  ALA    59      55.750  97.389  31.544  1.00  0.00
ATOM    469  C   ALA    59      58.215  97.124  31.891  1.00  0.00
ATOM    470  O   ALA    59      58.277  95.976  32.369  1.00  0.00
ATOM    471  N   GLU    60      59.126  97.591  31.049  1.00  0.00
ATOM    472  CA  GLU    60      60.181  96.826  30.404  1.00  0.00
ATOM    473  CB  GLU    60      59.987  96.803  28.894  1.00  0.00
ATOM    474  CG  GLU    60      58.819  95.951  28.439  1.00  0.00
ATOM    475  CD  GLU    60      58.327  96.236  27.016  1.00  0.00
ATOM    476  OE1 GLU    60      59.020  95.923  26.006  1.00  0.00
ATOM    477  OE2 GLU    60      57.132  96.725  26.949  1.00  0.00
ATOM    478  C   GLU    60      61.589  97.051  30.909  1.00  0.00
ATOM    479  O   GLU    60      62.537  96.788  30.203  1.00  0.00
ATOM    480  N   ASN    61      61.821  97.506  32.156  1.00  0.00
ATOM    481  CA  ASN    61      63.107  97.898  32.621  1.00  0.00
ATOM    482  CB  ASN    61      62.944  98.800  33.846  1.00  0.00
ATOM    483  CG  ASN    61      64.225  99.367  34.480  1.00  0.00
ATOM    484  OD1 ASN    61      64.409  99.229  35.677  1.00  0.00
ATOM    485  ND2 ASN    61      65.110  99.945  33.712  1.00  0.00
ATOM    486  C   ASN    61      63.951  96.670  32.971  1.00  0.00
ATOM    487  O   ASN    61      65.176  96.677  33.072  1.00  0.00
ATOM    488  N   CYX    62      63.308  95.522  33.197  1.00  0.00
ATOM    489  CA  CYX    62      63.982  94.210  33.440  1.00  0.00
ATOM    490  CB  CYX    62      63.348  93.496  34.618  1.00  0.00
ATOM    491  SG  CYX    62      63.865  94.066  36.320  1.00  0.00
ATOM    492  C   CYX    62      64.036  93.319  32.189  1.00  0.00
ATOM    493  O   CYX    62      62.987  93.015  31.584  1.00  0.00
ATOM    494  N   ASP    63      65.159  92.809  31.873  1.00  0.00
ATOM    495  CA  ASP    63      65.314  92.174  30.552  1.00  0.00
ATOM    496  CB  ASP    63      66.697  92.613  30.021  1.00  0.00
ATOM    497  CG  ASP    63      67.915  92.026  30.846  1.00  0.00
ATOM    498  OD1 ASP    63      68.531  91.087  30.293  1.00  0.00
ATOM    499  OD2 ASP    63      68.323  92.617  31.885  1.00  0.00
ATOM    500  C   ASP    63      65.214  90.661  30.578  1.00  0.00
ATOM    501  O   ASP    63      64.784  90.037  29.668  1.00  0.00
ATOM    502  N   LYS    64      65.394  90.137  31.803  1.00  0.00
ATOM    503  CA  LYS    64      65.424  88.688  32.069  1.00  0.00
ATOM    504  CB  LYS    64      66.591  88.274  33.002  1.00  0.00
ATOM    505  CG  LYS    64      67.959  88.623  32.352  1.00  0.00
ATOM    506  CD  LYS    64      69.205  88.231  33.128  1.00  0.00
ATOM    507  CE  LYS    64      70.490  88.799  32.636  1.00  0.00
ATOM    508  NZ  LYS    64      71.678  88.339  33.422  1.00  0.00
ATOM    509  C   LYS    64      64.175  88.289  32.842  1.00  0.00
ATOM    510  O   LYS    64      63.582  89.070  33.514  1.00  0.00
ATOM    511  N   SER    65      63.737  87.045  32.585  1.00  0.00
ATOM    512  CA  SER    65      62.761  86.270  33.334  1.00  0.00
ATOM    513  CB  SER    65      62.573  84.857  32.672  1.00  0.00
ATOM    514  OG  SER    65      63.691  84.023  32.784  1.00  0.00
ATOM    515  C   SER    65      63.256  86.035  34.743  1.00  0.00
ATOM    516  O   SER    65      64.464  86.071  35.040  1.00  0.00
ATOM    517  N   LEU    66      62.375  85.673  35.584  1.00  0.00
ATOM    518  CA  LEU    66      62.476  85.317  37.012  1.00  0.00
ATOM    519  CB  LEU    66      61.050  85.267  37.643  1.00  0.00
ATOM    520  CG  LEU    66      61.098  85.383  39.159  1.00  0.00
ATOM    521  CD1 LEU    66      61.762  86.637  39.695  1.00  0.00
ATOM    522  CD2 LEU    66      59.719  85.332  39.657  1.00  0.00
ATOM    523  C   LEU    66      63.339  84.057  37.260  1.00  0.00
ATOM    524  O   LEU    66      64.134  84.077  38.195  1.00  0.00
ATOM    525  N   HID    67      63.210  83.027  36.499  1.00  0.00
ATOM    526  CA  HID    67      64.051  81.825  36.534  1.00  0.00
ATOM    527  CB  HID    67      63.384  80.667  35.885  1.00  0.00
ATOM    528  CG  HID    67      63.748  79.267  36.530  1.00  0.00
ATOM    529  ND1 HID    67      63.478  78.839  37.786  1.00  0.00
ATOM    530  CE1 HID    67      63.818  77.521  37.878  1.00  0.00
ATOM    531  NE2 HID    67      64.323  77.068  36.656  1.00  0.00
ATOM    532  CD2 HID    67      64.185  78.151  35.839  1.00  0.00
ATOM    533  C   HID    67      65.510  82.019  36.084  1.00  0.00
ATOM    534  O   HID    67      66.490  81.420  36.636  1.00  0.00
ATOM    535  N   THR    68      65.746  82.924  35.110  1.00  0.00
ATOM    536  CA  THR    68      67.114  83.119  34.606  1.00  0.00
ATOM    537  CB  THR    68      67.089  83.283  33.081  1.00  0.00
ATOM    538  CG2 THR    68      68.484  83.743  32.607  1.00  0.00
ATOM    539  OG1 THR    68      66.858  82.073  32.459  1.00  0.00
ATOM    540  C   THR    68      67.870  84.247  35.320  1.00  0.00
ATOM    541  O   THR    68      69.083  84.171  35.438  1.00  0.00
ATOM    542  N   LEU    69      67.165  85.152  35.981  1.00  0.00
ATOM    543  CA  LEU    69      67.660  86.197  36.816  1.00  0.00
ATOM    544  CB  LEU    69      66.526  87.167  37.116  1.00  0.00
ATOM    545  CG  LEU    69      67.087  88.257  38.052  1.00  0.00
ATOM    546  CD1 LEU    69      68.279  89.003  37.427  1.00  0.00
ATOM    547  CD2 LEU    69      66.038  89.330  38.229  1.00  0.00
ATOM    548  C   LEU    69      68.383  85.587  38.032  1.00  0.00
ATOM    549  O   LEU    69      69.432  85.989  38.495  1.00  0.00
ATOM    550  N   PHE    70      67.778  84.567  38.654  1.00  0.00
ATOM    551  CA  PHE    70      68.328  83.775  39.726  1.00  0.00
ATOM    552  CB  PHE    70      67.127  82.950  40.346  1.00  0.00
ATOM    553  CG  PHE    70      67.504  81.834  41.293  1.00  0.00
ATOM    554  CD1 PHE    70      68.046  82.106  42.537  1.00  0.00
ATOM    555  CE1 PHE    70      68.560  81.127  43.419  1.00  0.00
ATOM    556  CZ  PHE    70      68.551  79.847  42.968  1.00  0.00
ATOM    557  CE2 PHE    70      68.033  79.484  41.750  1.00  0.00
ATOM    558  CD2 PHE    70      67.502  80.475  40.885  1.00  0.00
ATOM    559  C   PHE    70      69.503  82.899  39.301  1.00  0.00
ATOM    560  O   PHE    70      70.582  82.951  39.954  1.00  0.00
ATOM    561  N   GLY    71      69.384  82.145  38.185  1.00  0.00
ATOM    562  CA  GLY    71      70.456  81.350  37.644  1.00  0.00
ATOM    563  C   GLY    71      71.738  82.159  37.347  1.00  0.00
ATOM    564  O   GLY    71      72.807  81.854  37.852  1.00  0.00
ATOM    565  N   ASP    72      71.710  83.314  36.608  1.00  0.00
ATOM    566  CA  ASP    72      72.824  84.186  36.393  1.00  0.00
ATOM    567  CB  ASP    72      72.491  85.311  35.390  1.00  0.00
ATOM    568  CG  ASP    72      72.154  84.722  33.984  1.00  0.00
ATOM    569  OD1 ASP    72      71.845  85.556  33.113  1.00  0.00
ATOM    570  OD2 ASP    72      72.446  83.568  33.669  1.00  0.00
ATOM    571  C   ASP    72      73.524  84.817  37.663  1.00  0.00
ATOM    572  O   ASP    72      74.755  84.800  37.799  1.00  0.00
ATOM    573  N   LYS    73      72.713  85.309  38.589  1.00  0.00
ATOM    574  CA  LYS    73      73.156  85.747  39.935  1.00  0.00
ATOM    575  CB  LYS    73      71.961  86.296  40.750  1.00  0.00
ATOM    576  CG  LYS    73      71.374  87.635  40.299  1.00  0.00
ATOM    577  CD  LYS    73      72.099  88.912  40.806  1.00  0.00
ATOM    578  CE  LYS    73      73.517  89.002  40.300  1.00  0.00
ATOM    579  NZ  LYS    73      74.152  90.332  40.432  1.00  0.00
ATOM    580  C   LYS    73      73.746  84.623  40.763  1.00  0.00
ATOM    581  O   LYS    73      74.620  84.954  41.541  1.00  0.00
ATOM    582  N   LEU    74      73.268  83.381  40.683  1.00  0.00
ATOM    583  CA  LEU    74      73.841  82.196  41.364  1.00  0.00
ATOM    584  CB  LEU    74      72.820  81.060  41.160  1.00  0.00
ATOM    585  CG  LEU    74      72.948  79.681  41.824  1.00  0.00
ATOM    586  CD1 LEU    74      72.736  79.898  43.325  1.00  0.00
ATOM    587  CD2 LEU    74      71.869  78.791  41.197  1.00  0.00
ATOM    588  C   LEU    74      75.131  81.810  40.758  1.00  0.00
ATOM    589  O   LEU    74      76.046  81.461  41.399  1.00  0.00
ATOM    590  N   CYX    75      75.268  81.991  39.437  1.00  0.00
ATOM    591  CA  CYX    75      76.562  81.844  38.758  1.00  0.00
ATOM    592  CB  CYX    75      76.362  81.428  37.283  1.00  0.00
ATOM    593  SG  CYX    75      75.624  79.849  37.315  1.00  0.00
ATOM    594  C   CYX    75      77.557  82.936  38.984  1.00  0.00
ATOM    595  O   CYX    75      78.756  82.659  38.945  1.00  0.00
ATOM    596  N   THR    76      77.100  84.173  39.294  1.00  0.00
ATOM    597  CA  THR    76      78.012  85.295  39.611  1.00  0.00
ATOM    598  CB  THR    76      77.186  86.629  39.751  1.00  0.00
ATOM    599  CG2 THR    76      78.166  87.828  39.957  1.00  0.00
ATOM    600  OG1 THR    76      76.332  86.887  38.636  1.00  0.00
ATOM    601  C   THR    76      78.837  85.003  40.912  1.00  0.00
ATOM    602  O   THR    76      79.861  85.612  41.091  1.00  0.00
ATOM    603  N   VAL    77      78.349  84.013  41.723  1.00  0.00
ATOM    604  CA  VAL    77      79.050  83.593  42.958  1.00  0.00
ATOM    605  CB  VAL    77      78.386  84.134  44.292  1.00  0.00
ATOM    606  CG1 VAL    77      79.232  83.811  45.512  1.00  0.00
ATOM    607  CG2 VAL    77      78.065  85.650  44.300  1.00  0.00
ATOM    608  C   VAL    77      79.383  82.141  43.024  1.00  0.00
ATOM    609  O   VAL    77      80.345  81.732  43.616  1.00  0.00
ATOM    610  N   ALA    78      78.754  81.262  42.256  1.00  0.00
ATOM    611  CA  ALA    78      79.240  79.875  42.059  1.00  0.00
ATOM    612  CB  ALA    78      78.249  79.141  41.202  1.00  0.00
ATOM    613  C   ALA    78      80.672  79.775  41.455  1.00  0.00
ATOM    614  O   ALA    78      81.457  78.937  41.845  1.00  0.00
ATOM    615  N   THR    79      80.870  80.631  40.485  1.00  0.00
ATOM    616  CA  THR    79      82.050  80.550  39.541  1.00  0.00
ATOM    617  CB  THR    79      81.887  81.446  38.346  1.00  0.00
ATOM    618  CG2 THR    79      80.834  80.976  37.397  1.00  0.00
ATOM    619  OG1 THR    79      81.678  82.758  38.780  1.00  0.00
ATOM    620  C   THR    79      83.416  80.880  40.194  1.00  0.00
ATOM    621  O   THR    79      83.659  81.765  41.020  1.00  0.00
ATOM    622  N   LEU    80      84.435  80.068  39.687  1.00  0.00
ATOM    623  CA  LEU    80      85.904  80.179  39.891  1.00  0.00
ATOM    624  CB  LEU    80      86.403  81.471  39.174  1.00  0.00
ATOM    625  CG  LEU    80      87.879  81.552  38.805  1.00  0.00
ATOM    626  CD1 LEU    80      88.208  80.656  37.591  1.00  0.00
ATOM    627  CD2 LEU    80      88.251  82.924  38.327  1.00  0.00
ATOM    628  C   LEU    80      86.419  80.108  41.350  1.00  0.00
ATOM    629  O   LEU    80      87.254  80.856  41.767  1.00  0.00
ATOM    630  N   ARG    81      85.830  79.213  42.158  1.00  0.00
ATOM    631  CA  ARG    81      86.135  78.887  43.567  1.00  0.00
ATOM    632  CB  ARG    81      85.095  79.629  44.408  1.00  0.00
ATOM    633  CG  ARG    81      83.661  79.074  44.494  1.00  0.00
ATOM    634  CD  ARG    81      82.673  80.054  45.131  1.00  0.00
ATOM    635  NE  ARG    81      83.165  80.568  46.447  1.00  0.00
ATOM    636  CZ  ARG    81      82.778  81.765  46.876  1.00  0.00
ATOM    637  NH1 ARG    81      83.353  82.200  47.952  1.00  0.00
ATOM    638  NH2 ARG    81      81.947  82.568  46.300  1.00  0.00
ATOM    639  C   ARG    81      86.246  77.384  43.839  1.00  0.00
ATOM    640  O   ARG    81      85.569  76.588  43.204  1.00  0.00
ATOM    641  N   GLU    82      87.066  77.020  44.819  1.00  0.00
ATOM    642  CA  GLU    82      87.420  75.620  45.086  1.00  0.00
ATOM    643  CB  GLU    82      88.597  75.687  46.130  1.00  0.00
ATOM    644  CG  GLU    82      88.189  76.170  47.620  1.00  0.00
ATOM    645  CD  GLU    82      89.332  76.266  48.642  1.00  0.00
ATOM    646  OE1 GLU    82      89.890  77.348  48.947  1.00  0.00
ATOM    647  OE2 GLU    82      89.702  75.167  49.136  1.00  0.00
ATOM    648  C   GLU    82      86.217  74.779  45.632  1.00  0.00
ATOM    649  O   GLU    82      86.232  73.566  45.549  1.00  0.00
ATOM    650  N   THR    83      85.171  75.394  46.255  1.00  0.00
ATOM    651  CA  THR    83      83.934  74.704  46.740  1.00  0.00
ATOM    652  CB  THR    83      83.141  75.483  47.819  1.00  0.00
ATOM    653  CG2 THR    83      84.003  75.482  49.061  1.00  0.00
ATOM    654  OG1 THR    83      83.063  76.851  47.447  1.00  0.00
ATOM    655  C   THR    83      83.037  74.267  45.581  1.00  0.00
ATOM    656  O   THR    83      82.279  73.308  45.672  1.00  0.00
ATOM    657  N   TYR    84      83.178  74.955  44.476  1.00  0.00
ATOM    658  CA  TYR    84      82.479  74.579  43.216  1.00  0.00
ATOM    659  CB  TYR    84      82.231  75.784  42.304  1.00  0.00
ATOM    660  CG  TYR    84      81.528  75.566  41.018  1.00  0.00
ATOM    661  CD1 TYR    84      82.186  75.771  39.804  1.00  0.00
ATOM    662  CE1 TYR    84      81.462  75.772  38.561  1.00  0.00
ATOM    663  CZ  TYR    84      80.022  75.441  38.690  1.00  0.00
ATOM    664  OH  TYR    84      79.316  75.360  37.487  1.00  0.00
ATOM    665  CE2 TYR    84      79.430  75.283  39.937  1.00  0.00
ATOM    666  CD2 TYR    84      80.178  75.416  41.093  1.00  0.00
ATOM    667  C   TYR    84      83.178  73.551  42.282  1.00  0.00
ATOM    668  O   TYR    84      82.608  72.654  41.695  1.00  0.00
ATOM    669  N   GLY    85      84.528  73.740  42.095  1.00  0.00
ATOM    670  CA  GLY    85      85.374  72.836  41.261  1.00  0.00
ATOM    671  C   GLY    85      85.355  71.378  41.666  1.00  0.00
ATOM    672  O   GLY    85      85.975  70.605  40.961  1.00  0.00
ATOM    673  N   GLU    86      84.685  70.976  42.768  1.00  0.00
ATOM    674  CA  GLU    86      84.554  69.596  43.281  1.00  0.00
ATOM    675  CB  GLU    86      84.998  69.381  44.679  1.00  0.00
ATOM    676  CG  GLU    86      84.214  70.128  45.786  1.00  0.00
ATOM    677  CD  GLU    86      84.779  69.804  47.159  1.00  0.00
ATOM    678  OE1 GLU    86      84.015  69.837  48.144  1.00  0.00
ATOM    679  OE2 GLU    86      85.950  69.385  47.354  1.00  0.00
ATOM    680  C   GLU    86      83.187  68.973  42.937  1.00  0.00
ATOM    681  O   GLU    86      82.902  67.904  43.378  1.00  0.00
ATOM    682  N   MET    87      82.410  69.587  42.086  1.00  0.00
ATOM    683  CA  MET    87      81.080  69.144  41.643  1.00  0.00
ATOM    684  CB  MET    87      79.976  69.842  42.557  1.00  0.00
ATOM    685  CG  MET    87      79.854  71.354  42.380  1.00  0.00
ATOM    686  SD  MET    87      78.393  72.025  43.256  1.00  0.00
ATOM    687  CE  MET    87      77.250  72.315  41.907  1.00  0.00
ATOM    688  C   MET    87      80.957  69.365  40.137  1.00  0.00
ATOM    689  O   MET    87      81.917  69.439  39.395  1.00  0.00
ATOM    690  N   ALA    88      79.679  69.383  39.752  1.00  0.00
ATOM    691  CA  ALA    88      79.258  69.496  38.323  1.00  0.00
ATOM    692  CB  ALA    88      77.800  69.036  38.296  1.00  0.00
ATOM    693  C   ALA    88      79.336  70.894  37.656  1.00  0.00
ATOM    694  O   ALA    88      79.357  71.893  38.320  1.00  0.00
ATOM    695  N   ASP    89      79.434  70.856  36.328  1.00  0.00
ATOM    696  CA  ASP    89      79.600  72.121  35.559  1.00  0.00
ATOM    697  CB  ASP    89      80.271  71.704  34.239  1.00  0.00
ATOM    698  CG  ASP    89      79.622  70.644  33.323  1.00  0.00
ATOM    699  OD1 ASP    89      79.787  70.782  32.105  1.00  0.00
ATOM    700  OD2 ASP    89      79.146  69.629  33.864  1.00  0.00
ATOM    701  C   ASP    89      78.278  72.810  35.410  1.00  0.00
ATOM    702  O   ASP    89      77.833  72.951  34.264  1.00  0.00
ATOM    703  N   CYX    90      77.598  73.159  36.520  1.00  0.00
ATOM    704  CA  CYX    90      76.256  73.704  36.427  1.00  0.00
ATOM    705  CB  CYX    90      75.655  73.712  37.926  1.00  0.00
ATOM    706  SG  CYX    90      75.529  72.069  38.586  1.00  0.00
ATOM    707  C   CYX    90      76.209  75.037  35.761  1.00  0.00
ATOM    708  O   CYX    90      75.321  75.203  34.923  1.00  0.00
ATOM    709  N   CYX    91      77.116  75.983  36.057  1.00  0.00
ATOM    710  CA  CYX    91      77.189  77.278  35.281  1.00  0.00
ATOM    711  CB  CYX    91      77.884  78.328  36.114  1.00  0.00
ATOM    712  SG  CYX    91      77.225  78.626  37.686  1.00  0.00
ATOM    713  C   CYX    91      77.721  77.133  33.825  1.00  0.00
ATOM    714  O   CYX    91      78.067  78.199  33.208  1.00  0.00
ATOM    715  N   ALA    92      77.810  75.975  33.219  1.00  0.00
ATOM    716  CA  ALA    92      78.049  75.891  31.824  1.00  0.00
ATOM    717  CB  ALA    92      79.146  74.855  31.658  1.00  0.00
ATOM    718  C   ALA    92      76.744  75.532  31.037  1.00  0.00
ATOM    719  O   ALA    92      76.804  75.453  29.841  1.00  0.00
ATOM    720  N   LYS    93      75.563  75.429  31.661  1.00  0.00
ATOM    721  CA  LYS    93      74.258  75.181  30.898  1.00  0.00
ATOM    722  CB  LYS    93      73.557  74.021  31.493  1.00  0.00
ATOM    723  CG  LYS    93      74.190  72.672  31.550  1.00  0.00
ATOM    724  CD  LYS    93      74.973  72.182  30.303  1.00  0.00
ATOM    725  CE  LYS    93      75.391  70.737  30.614  1.00  0.00
ATOM    726  NZ  LYS    93      76.324  70.340  29.529  1.00  0.00
ATOM    727  C   LYS    93      73.430  76.515  30.998  1.00  0.00
ATOM    728  O   LYS    93      73.779  77.457  31.743  1.00  0.00
ATOM    729  N   GLN    94      72.261  76.490  30.421  1.00  0.00
ATOM    730  CA  GLN    94      71.168  77.434  30.764  1.00  0.00
ATOM    731  CB  GLN    94      70.644  78.146  29.457  1.00  0.00
ATOM    732  CG  GLN    94      71.661  79.239  29.075  1.00  0.00
ATOM    733  CD  GLN    94      71.349  79.950  27.745  1.00  0.00
ATOM    734  OE1 GLN    94      71.122  81.157  27.795  1.00  0.00
ATOM    735  NE2 GLN    94      71.210  79.269  26.667  1.00  0.00
ATOM    736  C   GLN    94      69.992  76.786  31.451  1.00  0.00
ATOM    737  O   GLN    94      70.016  75.575  31.774  1.00  0.00
ATOM    738  N   GLU    95      68.966  77.545  31.811  1.00  0.00
ATOM    739  CA  GLU    95      67.733  77.005  32.398  1.00  0.00
ATOM    740  CB  GLU    95      66.744  78.097  32.762  1.00  0.00
ATOM    741  CG  GLU    95      66.956  78.731  34.102  1.00  0.00
ATOM    742  CD  GLU    95      68.364  79.318  34.132  1.00  0.00
ATOM    743  OE1 GLU    95      68.555  80.355  33.436  1.00  0.00
ATOM    744  OE2 GLU    95      69.190  78.909  34.970  1.00  0.00
ATOM    745  C   GLU    95      67.121  75.988  31.408  1.00  0.00
ATOM    746  O   GLU    95      67.152  76.145  30.202  1.00  0.00
ATOM    747  N   PRO    96      66.588  74.858  31.945  1.00  0.00
ATOM    748  CD  PRO    96      65.649  74.119  31.124  1.00  0.00
ATOM    749  CG  PRO    96      64.978  73.059  32.026  1.00  0.00
ATOM    750  CB  PRO    96      65.128  73.683  33.402  1.00  0.00
ATOM    751  CA  PRO    96      66.429  74.471  33.326  1.00  0.00
ATOM    752  C   PRO    96      67.550  73.546  33.703  1.00  0.00
ATOM    753  O   PRO    96      67.738  73.306  34.892  1.00  0.00
ATOM    754  N   GLU    97      68.345  73.072  32.731  1.00  0.00
ATOM    755  CA  GLU    97      69.468  72.120  32.906  1.00  0.00
ATOM    756  CB  GLU    97      70.237  71.976  31.602  1.00  0.00
ATOM    757  CG  GLU    97      69.262  71.952  30.374  1.00  0.00
ATOM    758  CD  GLU    97      70.061  71.251  29.226  1.00  0.00
ATOM    759  OE1 GLU    97      70.798  71.897  28.483  1.00  0.00
ATOM    760  OE2 GLU    97      69.683  70.091  28.935  1.00  0.00
ATOM    761  C   GLU    97      70.452  72.592  33.987  1.00  0.00
ATOM    762  O   GLU    97      70.911  71.779  34.791  1.00  0.00
ATOM    763  N   ARG    98      70.735  73.890  34.115  1.00  0.00
ATOM    764  CA  ARG    98      71.537  74.556  35.146  1.00  0.00
ATOM    765  CB  ARG    98      71.839  75.973  34.714  1.00  0.00
ATOM    766  CG  ARG    98      72.545  76.867  35.788  1.00  0.00
ATOM    767  CD  ARG    98      72.922  78.315  35.323  1.00  0.00
ATOM    768  NE  ARG    98      71.887  79.220  34.815  1.00  0.00
ATOM    769  CZ  ARG    98      72.099  80.452  34.537  1.00  0.00
ATOM    770  NH1 ARG    98      71.102  81.226  34.170  1.00  0.00
ATOM    771  NH2 ARG    98      73.257  81.121  34.573  1.00  0.00
ATOM    772  C   ARG    98      70.773  74.595  36.533  1.00  0.00
ATOM    773  O   ARG    98      71.472  74.328  37.507  1.00  0.00
ATOM    774  N   ASN    99      69.524  74.872  36.637  1.00  0.00
ATOM    775  CA  ASN    99      68.822  74.853  37.915  1.00  0.00
ATOM    776  CB  ASN    99      67.399  75.511  37.784  1.00  0.00
ATOM    777  CG  ASN    99      66.911  75.845  39.161  1.00  0.00
ATOM    778  OD1 ASN    99      66.649  74.972  39.950  1.00  0.00
ATOM    779  ND2 ASN    99      66.792  77.144  39.400  1.00  0.00
ATOM    780  C   ASN    99      68.778  73.464  38.509  1.00  0.00
ATOM    781  O   ASN    99      69.185  73.253  39.622  1.00  0.00
ATOM    782  N   GLU   100      68.468  72.528  37.687  1.00  0.00
ATOM    783  CA  GLU   100      68.423  71.110  37.925  1.00  0.00
ATOM    784  CB  GLU   100      67.945  70.310  36.703  1.00  0.00
ATOM    785  CG  GLU   100      67.751  68.736  36.993  1.00  0.00
ATOM    786  CD  GLU   100      67.146  67.993  35.806  1.00  0.00
ATOM    787  OE1 GLU   100      65.999  68.327  35.430  1.00  0.00
ATOM    788  OE2 GLU   100      67.840  67.186  35.162  1.00  0.00
ATOM    789  C   GLU   100      69.797  70.658  38.350  1.00  0.00
ATOM    790  O   GLU   100      69.838  69.696  39.133  1.00  0.00
ATOM    791  N   CYX   101      70.798  71.403  37.944  1.00  0.00
ATOM    792  CA  CYX   101      72.143  70.916  38.269  1.00  0.00
ATOM    793  CB  CYX   101      73.115  71.166  37.066  1.00  0.00
ATOM    794  SG  CYX   101      74.874  70.798  37.125  1.00  0.00
ATOM    795  C   CYX   101      72.553  71.337  39.664  1.00  0.00
ATOM    796  O   CYX   101      73.045  70.516  40.420  1.00  0.00
ATOM    797  N   PHE   102      72.251  72.559  40.128  1.00  0.00
ATOM    798  CA  PHE   102      72.476  72.954  41.499  1.00  0.00
ATOM    799  CB  PHE   102      72.508  74.476  41.716  1.00  0.00
ATOM    800  CG  PHE   102      73.700  75.160  41.102  1.00  0.00
ATOM    801  CD1 PHE   102      74.858  75.132  41.858  1.00  0.00
ATOM    802  CE1 PHE   102      76.079  75.743  41.428  1.00  0.00
ATOM    803  CZ  PHE   102      75.909  76.549  40.309  1.00  0.00
ATOM    804  CE2 PHE   102      74.753  76.683  39.531  1.00  0.00
ATOM    805  CD2 PHE   102      73.635  75.951  39.959  1.00  0.00
ATOM    806  C   PHE   102      71.555  72.169  42.416  1.00  0.00
ATOM    807  O   PHE   102      71.895  71.868  43.554  1.00  0.00
ATOM    808  N   LEU   103      70.272  71.873  42.032  1.00  0.00
ATOM    809  CA  LEU   103      69.262  70.993  42.829  1.00  0.00
ATOM    810  CB  LEU   103      67.945  70.944  41.955  1.00  0.00
ATOM    811  CG  LEU   103      66.724  70.305  42.633  1.00  0.00
ATOM    812  CD1 LEU   103      66.296  71.262  43.716  1.00  0.00
ATOM    813  CD2 LEU   103      65.689  69.875  41.646  1.00  0.00
ATOM    814  C   LEU   103      69.861  69.603  43.196  1.00  0.00
ATOM    815  O   LEU   103      69.779  69.195  44.369  1.00  0.00
ATOM    816  N   GLN   104      70.486  68.902  42.267  1.00  0.00
ATOM    817  CA  GLN   104      71.010  67.562  42.477  1.00  0.00
ATOM    818  CB  GLN   104      71.660  66.950  41.218  1.00  0.00
ATOM    819  CG  GLN   104      70.554  66.707  40.078  1.00  0.00
ATOM    820  CD  GLN   104      71.221  66.299  38.784  1.00  0.00
ATOM    821  OE1 GLN   104      72.444  66.176  38.593  1.00  0.00
ATOM    822  NE2 GLN   104      70.467  66.119  37.715  1.00  0.00
ATOM    823  C   GLN   104      72.125  67.533  43.593  1.00  0.00
ATOM    824  O   GLN   104      72.571  66.429  44.007  1.00  0.00
ATOM    825  N   HID   105      72.516  68.688  44.121  1.00  0.00
ATOM    826  CA  HID   105      73.696  68.881  44.961  1.00  0.00
ATOM    827  CB  HID   105      74.766  69.775  44.204  1.00  0.00
ATOM    828  CG  HID   105      75.409  69.006  43.040  1.00  0.00
ATOM    829  ND1 HID   105      75.100  69.156  41.626  1.00  0.00
ATOM    830  CE1 HID   105      75.834  68.255  40.993  1.00  0.00
ATOM    831  NE2 HID   105      76.673  67.655  41.781  1.00  0.00
ATOM    832  CD2 HID   105      76.409  68.074  43.097  1.00  0.00
ATOM    833  C   HID   105      73.266  69.568  46.273  1.00  0.00
ATOM    834  O   HID   105      74.108  69.553  47.212  1.00  0.00
ATOM    835  N   LYS   106      72.034  70.096  46.486  1.00  0.00
ATOM    836  CA  LYS   106      71.642  70.683  47.812  1.00  0.00
ATOM    837  CB  LYS   106      70.598  71.813  47.595  1.00  0.00
ATOM    838  CG  LYS   106      69.093  71.372  47.466  1.00  0.00
ATOM    839  CD  LYS   106      68.151  72.575  47.221  1.00  0.00
ATOM    840  CE  LYS   106      66.634  72.104  47.535  1.00  0.00
ATOM    841  NZ  LYS   106      65.503  73.096  47.256  1.00  0.00
ATOM    842  C   LYS   106      71.269  69.554  48.805  1.00  0.00
ATOM    843  O   LYS   106      70.331  68.749  48.539  1.00  0.00
ATOM    844  N   ASP   107      71.842  69.560  50.018  1.00  0.00
ATOM    845  CA  ASP   107      71.670  68.490  50.968  1.00  0.00
ATOM    846  CB  ASP   107      72.466  67.242  50.472  1.00  0.00
ATOM    847  CG  ASP   107      72.054  65.870  51.120  1.00  0.00
ATOM    848  OD1 ASP   107      70.964  65.792  51.722  1.00  0.00
ATOM    849  OD2 ASP   107      72.844  64.869  50.866  1.00  0.00
ATOM    850  C   ASP   107      72.073  68.888  52.444  1.00  0.00
ATOM    851  O   ASP   107      72.756  69.913  52.710  1.00  0.00
ATOM    852  N   ASP   108      71.570  68.119  53.453  1.00  0.00
ATOM    853  CA  ASP   108      71.695  68.347  54.885  1.00  0.00
ATOM    854  CB  ASP   108      70.857  67.302  55.691  1.00  0.00
ATOM    855  CG  ASP   108      70.903  67.614  57.190  1.00  0.00
ATOM    856  OD1 ASP   108      71.622  66.855  57.883  1.00  0.00
ATOM    857  OD2 ASP   108      70.268  68.617  57.614  1.00  0.00
ATOM    858  C   ASP   108      73.209  68.470  55.245  1.00  0.00
ATOM    859  O   ASP   108      73.989  67.601  54.838  1.00  0.00
ATOM    860  N   ASN   109      73.577  69.428  56.084  1.00  0.00
ATOM    861  CA  ASN   109      74.943  70.028  56.107  1.00  0.00
ATOM    862  CB  ASN   109      74.601  71.434  56.499  1.00  0.00
ATOM    863  CG  ASN   109      75.811  72.382  56.507  1.00  0.00
ATOM    864  OD1 ASN   109      76.837  72.066  57.151  1.00  0.00
ATOM    865  ND2 ASN   109      75.742  73.546  55.954  1.00  0.00
ATOM    866  C   ASN   109      75.965  69.155  56.985  1.00  0.00
ATOM    867  O   ASN   109      75.949  69.257  58.210  1.00  0.00
ATOM    868  N   PRO   110      76.926  68.428  56.360  1.00  0.00
ATOM    869  CD  PRO   110      76.966  68.151  54.933  1.00  0.00
ATOM    870  CG  PRO   110      78.273  67.405  54.740  1.00  0.00
ATOM    871  CB  PRO   110      78.607  66.773  56.077  1.00  0.00
ATOM    872  CA  PRO   110      78.010  67.804  57.078  1.00  0.00
ATOM    873  C   PRO   110      79.146  68.756  57.393  1.00  0.00
ATOM    874  O   PRO   110      79.951  68.433  58.229  1.00  0.00
ATOM    875  N   ASN   111      79.165  69.979  56.860  1.00  0.00
ATOM    876  CA  ASN   111      80.304  70.900  57.069  1.00  0.00
ATOM    877  CB  ASN   111      80.274  71.912  55.870  1.00  0.00
ATOM    878  CG  ASN   111      80.093  71.228  54.484  1.00  0.00
ATOM    879  OD1 ASN   111      79.175  71.543  53.715  1.00  0.00
ATOM    880  ND2 ASN   111      80.889  70.255  54.121  1.00  0.00
ATOM    881  C   ASN   111      80.253  71.786  58.349  1.00  0.00
ATOM    882  O   ASN   111      81.266  72.225  58.851  1.00  0.00
ATOM    883  N   LEU   112      79.082  72.014  58.971  1.00  0.00
ATOM    884  CA  LEU   112      78.906  72.821  60.189  1.00  0.00
ATOM    885  CB  LEU   112      77.694  73.815  60.047  1.00  0.00
ATOM    886  CG  LEU   112      77.820  74.843  58.889  1.00  0.00
ATOM    887  CD1 LEU   112      76.439  75.563  58.643  1.00  0.00
ATOM    888  CD2 LEU   112      78.697  76.061  59.085  1.00  0.00
ATOM    889  C   LEU   112      78.893  71.975  61.440  1.00  0.00
ATOM    890  O   LEU   112      78.276  70.889  61.503  1.00  0.00
ATOM    891  N   PRO   113      79.554  72.450  62.544  1.00  0.00
ATOM    892  CD  PRO   113      80.155  73.803  62.750  1.00  0.00
ATOM    893  CG  PRO   113      80.179  74.022  64.229  1.00  0.00
ATOM    894  CB  PRO   113      80.189  72.577  64.801  1.00  0.00
ATOM    895  CA  PRO   113      79.353  71.770  63.849  1.00  0.00
ATOM    896  C   PRO   113      77.860  71.674  64.253  1.00  0.00
ATOM    897  O   PRO   113      77.051  72.549  63.895  1.00  0.00
ATOM    898  N   ARG   114      77.525  70.556  64.905  1.00  0.00
ATOM    899  CA  ARG   114      76.134  70.140  65.235  1.00  0.00
ATOM    900  CB  ARG   114      75.851  69.036  64.268  1.00  0.00
ATOM    901  CG  ARG   114      74.408  68.859  63.913  1.00  0.00
ATOM    902  CD  ARG   114      74.136  67.840  62.827  1.00  0.00
ATOM    903  NE  ARG   114      72.727  67.920  62.490  1.00  0.00
ATOM    904  CZ  ARG   114      72.240  67.849  61.245  1.00  0.00
ATOM    905  NH1 ARG   114      70.977  68.060  61.009  1.00  0.00
ATOM    906  NH2 ARG   114      72.986  67.373  60.255  1.00  0.00
ATOM    907  C   ARG   114      75.863  69.595  66.661  1.00  0.00
ATOM    908  O   ARG   114      76.670  68.848  67.243  1.00  0.00
ATOM    909  N   LEU   115      74.665  69.940  67.255  1.00  0.00
ATOM    910  CA  LEU   115      74.407  69.927  68.692  1.00  0.00
ATOM    911  CB  LEU   115      74.017  68.556  69.210  1.00  0.00
ATOM    912  CG  LEU   115      72.697  68.079  68.583  1.00  0.00
ATOM    913  CD1 LEU   115      72.372  66.640  69.183  1.00  0.00
ATOM    914  CD2 LEU   115      71.492  68.953  68.975  1.00  0.00
ATOM    915  C   LEU   115      75.485  70.534  69.562  1.00  0.00
ATOM    916  O   LEU   115      75.892  69.935  70.535  1.00  0.00
ATOM    917  N   VAL   116      75.880  71.790  69.216  1.00  0.00
ATOM    918  CA  VAL   116      76.866  72.674  69.894  1.00  0.00
ATOM    919  CB  VAL   116      78.041  73.064  68.951  1.00  0.00
ATOM    920  CG1 VAL   116      78.583  71.787  68.257  1.00  0.00
ATOM    921  CG2 VAL   116      77.652  74.115  67.877  1.00  0.00
ATOM    922  C   VAL   116      76.181  73.840  70.585  1.00  0.00
ATOM    923  O   VAL   116      75.054  74.198  70.128  1.00  0.00
ATOM    924  N   ARG   117      76.892  74.569  71.480  1.00  0.00
ATOM    925  CA  ARG   117      76.284  75.764  72.157  1.00  0.00
ATOM    926  CB  ARG   117      77.366  76.100  73.213  1.00  0.00
ATOM    927  CG  ARG   117      76.737  76.987  74.289  1.00  0.00
ATOM    928  CD  ARG   117      77.638  77.494  75.453  1.00  0.00
ATOM    929  NE  ARG   117      78.042  76.256  76.199  1.00  0.00
ATOM    930  CZ  ARG   117      78.815  76.137  77.324  1.00  0.00
ATOM    931  NH1 ARG   117      78.760  75.054  78.062  1.00  0.00
ATOM    932  NH2 ARG   117      79.630  77.060  77.712  1.00  0.00
ATOM    933  C   ARG   117      75.852  76.897  71.166  1.00  0.00
ATOM    934  O   ARG   117      76.742  77.189  70.324  1.00  0.00
ATOM    935  N   PRO   118      74.706  77.603  71.204  1.00  0.00
ATOM    936  CD  PRO   118      73.519  77.124  71.808  1.00  0.00
ATOM    937  CG  PRO   118      72.434  77.777  70.888  1.00  0.00
ATOM    938  CB  PRO   118      72.941  79.130  70.359  1.00  0.00
ATOM    939  CA  PRO   118      74.493  78.863  70.436  1.00  0.00
ATOM    940  C   PRO   118      75.253  80.069  71.002  1.00  0.00
ATOM    941  O   PRO   118      75.806  79.948  72.119  1.00  0.00
ATOM    942  N   GLU   119      75.340  81.183  70.261  1.00  0.00
ATOM    943  CA  GLU   119      76.264  82.285  70.585  1.00  0.00
ATOM    944  CB  GLU   119      76.633  83.002  69.268  1.00  0.00
ATOM    945  CG  GLU   119      77.537  82.159  68.371  1.00  0.00
ATOM    946  CD  GLU   119      76.823  81.029  67.530  1.00  0.00
ATOM    947  OE1 GLU   119      77.453  79.958  67.182  1.00  0.00
ATOM    948  OE2 GLU   119      75.654  81.200  67.130  1.00  0.00
ATOM    949  C   GLU   119      75.666  83.323  71.655  1.00  0.00
ATOM    950  O   GLU   119      75.606  84.552  71.492  1.00  0.00
ATOM    951  N   VAL   120      75.171  82.739  72.724  1.00  0.00
ATOM    952  CA  VAL   120      74.250  83.482  73.702  1.00  0.00
ATOM    953  CB  VAL   120      73.394  82.551  74.513  1.00  0.00
ATOM    954  CG1 VAL   120      72.383  81.965  73.593  1.00  0.00
ATOM    955  CG2 VAL   120      74.160  81.398  75.193  1.00  0.00
ATOM    956  C   VAL   120      74.978  84.461  74.654  1.00  0.00
ATOM    957  O   VAL   120      74.341  85.271  75.348  1.00  0.00
ATOM    958  N   ASP   121      76.284  84.484  74.522  1.00  0.00
ATOM    959  CA  ASP   121      77.241  85.425  75.141  1.00  0.00
ATOM    960  CB  ASP   121      78.573  84.667  75.216  1.00  0.00
ATOM    961  CG  ASP   121      79.094  84.121  73.859  1.00  0.00
ATOM    962  OD1 ASP   121      78.393  83.366  73.151  1.00  0.00
ATOM    963  OD2 ASP   121      80.286  84.317  73.629  1.00  0.00
ATOM    964  C   ASP   121      77.495  86.680  74.324  1.00  0.00
ATOM    965  O   ASP   121      78.159  87.655  74.705  1.00  0.00
ATOM    966  N   VAL   122      76.804  86.724  73.196  1.00  0.00
ATOM    967  CA  VAL   122      76.653  87.938  72.362  1.00  0.00
ATOM    968  CB  VAL   122      77.744  87.958  71.174  1.00  0.00
ATOM    969  CG1 VAL   122      79.164  87.825  71.672  1.00  0.00
ATOM    970  CG2 VAL   122      77.517  86.805  70.124  1.00  0.00
ATOM    971  C   VAL   122      75.285  88.189  71.681  1.00  0.00
ATOM    972  O   VAL   122      74.935  89.324  71.495  1.00  0.00
ATOM    973  N   MET   123      74.521  87.153  71.359  1.00  0.00
ATOM    974  CA  MET   123      73.403  87.362  70.480  1.00  0.00
ATOM    975  CB  MET   123      72.550  86.106  70.454  1.00  0.00
ATOM    976  CG  MET   123      73.064  85.029  69.460  1.00  0.00
ATOM    977  SD  MET   123      72.588  83.357  70.007  1.00  0.00
ATOM    978  CE  MET   123      71.605  82.846  68.623  1.00  0.00
ATOM    979  C   MET   123      72.448  88.479  70.745  1.00  0.00
ATOM    980  O   MET   123      71.816  89.013  69.819  1.00  0.00
ATOM    981  N   CYX   124      72.166  88.826  71.999  1.00  0.00
ATOM    982  CA  CYX   124      71.315  89.991  72.394  1.00  0.00
ATOM    983  CB  CYX   124      71.088  89.983  73.940  1.00  0.00
ATOM    984  SG  CYX   124      69.905  88.754  74.414  1.00  0.00
ATOM    985  C   CYX   124      71.962  91.337  71.878  1.00  0.00
ATOM    986  O   CYX   124      71.165  92.212  71.441  1.00  0.00
ATOM    987  N   THR   125      73.273  91.533  71.758  1.00  0.00
ATOM    988  CA  THR   125      74.021  92.701  71.122  1.00  0.00
ATOM    989  CB  THR   125      75.498  92.727  71.557  1.00  0.00
ATOM    990  CG2 THR   125      75.676  92.513  73.086  1.00  0.00
ATOM    991  OG1 THR   125      76.191  91.706  70.961  1.00  0.00
ATOM    992  C   THR   125      73.886  92.731  69.630  1.00  0.00
ATOM    993  O   THR   125      74.146  93.823  69.076  1.00  0.00
ATOM    994  N   ALA   126      73.683  91.613  68.924  1.00  0.00
ATOM    995  CA  ALA   126      73.156  91.657  67.590  1.00  0.00
ATOM    996  CB  ALA   126      73.642  90.459  66.716  1.00  0.00
ATOM    997  C   ALA   126      71.633  91.849  67.429  1.00  0.00
ATOM    998  O   ALA   126      71.148  92.602  66.607  1.00  0.00
ATOM    999  N   PHE   127      70.806  91.251  68.335  1.00  0.00
ATOM   1000  CA  PHE   127      69.337  91.534  68.311  1.00  0.00
ATOM   1001  CB  PHE   127      68.682  90.762  69.517  1.00  0.00
ATOM   1002  CG  PHE   127      67.220  91.137  69.766  1.00  0.00
ATOM   1003  CD1 PHE   127      66.286  91.184  68.746  1.00  0.00
ATOM   1004  CE1 PHE   127      64.942  91.387  68.963  1.00  0.00
ATOM   1005  CZ  PHE   127      64.593  91.857  70.257  1.00  0.00
ATOM   1006  CE2 PHE   127      65.561  91.925  71.314  1.00  0.00
ATOM   1007  CD2 PHE   127      66.888  91.497  71.067  1.00  0.00
ATOM   1008  C   PHE   127      69.037  93.058  68.555  1.00  0.00
ATOM   1009  O   PHE   127      68.247  93.685  67.868  1.00  0.00
ATOM   1010  N   HID   128      69.852  93.708  69.452  1.00  0.00
ATOM   1011  CA  HID   128      69.677  95.016  70.002  1.00  0.00
ATOM   1012  CB  HID   128      70.264  95.337  71.428  1.00  0.00
ATOM   1013  CG  HID   128      70.063  96.756  71.960  1.00  0.00
ATOM   1014  ND1 HID   128      71.015  97.836  71.703  1.00  0.00
ATOM   1015  CE1 HID   128      70.500  98.916  72.330  1.00  0.00
ATOM   1016  NE2 HID   128      69.333  98.707  72.931  1.00  0.00
ATOM   1017  CD2 HID   128      69.040  97.311  72.686  1.00  0.00
ATOM   1018  C   HID   128      70.046  96.187  69.073  1.00  0.00
ATOM   1019  O   HID   128      69.267  97.128  68.874  1.00  0.00
ATOM   1020  N   ASP   129      71.182  96.099  68.370  1.00  0.00
ATOM   1021  CA  ASP   129      71.662  97.156  67.394  1.00  0.00
ATOM   1022  CB  ASP   129      72.938  97.805  67.856  1.00  0.00
ATOM   1023  CG  ASP   129      73.008  98.067  69.362  1.00  0.00
ATOM   1024  OD1 ASP   129      72.985  99.245  69.677  1.00  0.00
ATOM   1025  OD2 ASP   129      73.231  97.165  70.178  1.00  0.00
ATOM   1026  C   ASP   129      71.719  96.713  65.898  1.00  0.00
ATOM   1027  O   ASP   129      71.707  97.630  65.047  1.00  0.00
ATOM   1028  N   ASN   130      71.640  95.419  65.560  1.00  0.00
ATOM   1029  CA  ASN   130      71.658  94.921  64.131  1.00  0.00
ATOM   1030  CB  ASN   130      72.987  94.117  63.801  1.00  0.00
ATOM   1031  CG  ASN   130      74.277  94.862  64.006  1.00  0.00
ATOM   1032  OD1 ASN   130      75.080  94.531  64.838  1.00  0.00
ATOM   1033  ND2 ASN   130      74.474  95.931  63.285  1.00  0.00
ATOM   1034  C   ASN   130      70.307  94.158  63.809  1.00  0.00
ATOM   1035  O   ASN   130      70.289  93.322  62.927  1.00  0.00
ATOM   1036  N   GLU   131      69.142  94.419  64.443  1.00  0.00
ATOM   1037  CA  GLU   131      67.951  93.609  64.474  1.00  0.00
ATOM   1038  CB  GLU   131      66.697  94.332  65.040  1.00  0.00
ATOM   1039  CG  GLU   131      65.591  93.382  65.557  1.00  0.00
ATOM   1040  CD  GLU   131      64.254  93.990  65.785  1.00  0.00
ATOM   1041  OE1 GLU   131      63.749  94.083  66.895  1.00  0.00
ATOM   1042  OE2 GLU   131      63.626  94.449  64.781  1.00  0.00
ATOM   1043  C   GLU   131      67.562  92.985  63.056  1.00  0.00
ATOM   1044  O   GLU   131      67.517  91.788  62.826  1.00  0.00
ATOM   1045  N   GLU   132      67.367  93.849  62.077  1.00  0.00
ATOM   1046  CA  GLU   132      66.890  93.386  60.722  1.00  0.00
ATOM   1047  CB  GLU   132      66.467  94.523  59.851  1.00  0.00
ATOM   1048  CG  GLU   132      67.568  95.516  59.472  1.00  0.00
ATOM   1049  CD  GLU   132      66.966  96.775  58.820  1.00  0.00
ATOM   1050  OE1 GLU   132      66.076  96.739  57.957  1.00  0.00
ATOM   1051  OE2 GLU   132      67.480  97.911  59.119  1.00  0.00
ATOM   1052  C   GLU   132      67.884  92.581  59.957  1.00  0.00
ATOM   1053  O   GLU   132      67.423  91.637  59.290  1.00  0.00
ATOM   1054  N   THR   133      69.227  92.814  60.176  1.00  0.00
ATOM   1055  CA  THR   133      70.312  91.857  59.830  1.00  0.00
ATOM   1056  CB  THR   133      71.620  92.706  59.511  1.00  0.00
ATOM   1057  CG2 THR   133      72.728  92.006  58.650  1.00  0.00
ATOM   1058  OG1 THR   133      71.273  93.854  58.858  1.00  0.00
ATOM   1059  C   THR   133      70.644  90.671  60.672  1.00  0.00
ATOM   1060  O   THR   133      71.107  89.660  60.187  1.00  0.00
ATOM   1061  N   PHE   134      70.259  90.695  61.935  1.00  0.00
ATOM   1062  CA  PHE   134      70.226  89.662  62.952  1.00  0.00
ATOM   1063  CB  PHE   134      70.205  90.190  64.337  1.00  0.00
ATOM   1064  CG  PHE   134      70.134  89.085  65.324  1.00  0.00
ATOM   1065  CD1 PHE   134      68.969  88.920  66.082  1.00  0.00
ATOM   1066  CE1 PHE   134      68.937  88.065  67.193  1.00  0.00
ATOM   1067  CZ  PHE   134      70.042  87.248  67.412  1.00  0.00
ATOM   1068  CE2 PHE   134      71.226  87.341  66.650  1.00  0.00
ATOM   1069  CD2 PHE   134      71.218  88.203  65.525  1.00  0.00
ATOM   1070  C   PHE   134      69.172  88.617  62.566  1.00  0.00
ATOM   1071  O   PHE   134      69.513  87.413  62.478  1.00  0.00
ATOM   1072  N   LEU   135      67.943  88.990  62.157  1.00  0.00
ATOM   1073  CA  LEU   135      66.915  88.128  61.613  1.00  0.00
ATOM   1074  CB  LEU   135      65.475  88.797  61.461  1.00  0.00
ATOM   1075  CG  LEU   135      65.015  89.466  62.818  1.00  0.00
ATOM   1076  CD1 LEU   135      63.821  90.448  62.609  1.00  0.00
ATOM   1077  CD2 LEU   135      64.516  88.456  63.933  1.00  0.00
ATOM   1078  C   LEU   135      67.500  87.464  60.322  1.00  0.00
ATOM   1079  O   LEU   135      67.565  86.243  60.221  1.00  0.00
ATOM   1080  N   LYN   136      67.982  88.263  59.316  1.00  0.00
ATOM   1081  CA  LYN   136      68.603  87.854  58.062  1.00  0.00
ATOM   1082  CB  LYN   136      69.067  89.098  57.287  1.00  0.00
ATOM   1083  CG  LYN   136      69.199  88.940  55.751  1.00  0.00
ATOM   1084  CD  LYN   136      69.628  90.150  54.851  1.00  0.00
ATOM   1085  CE  LYN   136      68.470  90.879  54.265  1.00  0.00
ATOM   1086  NZ  LYN   136      67.594  91.612  55.226  1.00  0.00
ATOM   1087  C   LYN   136      69.811  86.896  58.159  1.00  0.00
ATOM   1088  O   LYN   136      69.802  85.845  57.515  1.00  0.00
ATOM   1089  N   LYS   137      70.741  87.163  59.077  1.00  0.00
ATOM   1090  CA  LYS   137      71.884  86.236  59.288  1.00  0.00
ATOM   1091  CB  LYS   137      72.889  86.976  60.156  1.00  0.00
ATOM   1092  CG  LYS   137      74.116  86.042  60.569  1.00  0.00
ATOM   1093  CD  LYS   137      75.028  85.564  59.413  1.00  0.00
ATOM   1094  CE  LYS   137      76.166  84.742  59.937  1.00  0.00
ATOM   1095  NZ  LYS   137      77.342  85.551  59.976  1.00  0.00
ATOM   1096  C   LYS   137      71.432  84.839  59.875  1.00  0.00
ATOM   1097  O   LYS   137      72.160  83.853  59.623  1.00  0.00
ATOM   1098  N   TYR   138      70.270  84.688  60.536  1.00  0.00
ATOM   1099  CA  TYR   138      69.730  83.323  60.947  1.00  0.00
ATOM   1100  CB  TYR   138      68.659  83.510  62.099  1.00  0.00
ATOM   1101  CG  TYR   138      68.126  82.245  62.733  1.00  0.00
ATOM   1102  CD1 TYR   138      69.032  81.485  63.466  1.00  0.00
ATOM   1103  CE1 TYR   138      68.573  80.328  64.177  1.00  0.00
ATOM   1104  CZ  TYR   138      67.232  80.085  64.364  1.00  0.00
ATOM   1105  OH  TYR   138      66.769  79.210  65.300  1.00  0.00
ATOM   1106  CE2 TYR   138      66.296  80.850  63.594  1.00  0.00
ATOM   1107  CD2 TYR   138      66.753  81.925  62.746  1.00  0.00
ATOM   1108  C   TYR   138      68.925  82.613  59.784  1.00  0.00
ATOM   1109  O   TYR   138      68.927  81.371  59.686  1.00  0.00
ATOM   1110  N   LEU   139      68.266  83.391  58.936  1.00  0.00
ATOM   1111  CA  LEU   139      67.747  82.861  57.678  1.00  0.00
ATOM   1112  CB  LEU   139      66.980  83.973  56.955  1.00  0.00
ATOM   1113  CG  LEU   139      65.677  84.445  57.553  1.00  0.00
ATOM   1114  CD1 LEU   139      64.984  85.495  56.683  1.00  0.00
ATOM   1115  CD2 LEU   139      64.665  83.253  57.815  1.00  0.00
ATOM   1116  C   LEU   139      68.882  82.389  56.780  1.00  0.00
ATOM   1117  O   LEU   139      68.696  81.344  56.172  1.00  0.00
ATOM   1118  N   TYR   140      70.113  82.926  56.860  1.00  0.00
ATOM   1119  CA  TYR   140      71.342  82.400  56.199  1.00  0.00
ATOM   1120  CB  TYR   140      72.421  83.489  56.332  1.00  0.00
ATOM   1121  CG  TYR   140      73.841  83.084  55.993  1.00  0.00
ATOM   1122  CD1 TYR   140      74.273  83.080  54.701  1.00  0.00
ATOM   1123  CE1 TYR   140      75.613  82.619  54.362  1.00  0.00
ATOM   1124  CZ  TYR   140      76.484  82.207  55.392  1.00  0.00
ATOM   1125  OH  TYR   140      77.791  81.982  55.126  1.00  0.00
ATOM   1126  CE2 TYR   140      76.000  82.274  56.748  1.00  0.00
ATOM   1127  CD2 TYR   140      74.714  82.676  57.007  1.00  0.00
ATOM   1128  C   TYR   140      71.703  81.063  56.906  1.00  0.00
ATOM   1129  O   TYR   140      71.990  80.039  56.289  1.00  0.00
ATOM   1130  N   GLU   141      71.715  81.030  58.245  1.00  0.00
ATOM   1131  CA  GLU   141      71.903  79.753  59.006  1.00  0.00
ATOM   1132  CB  GLU   141      71.806  80.075  60.508  1.00  0.00
ATOM   1133  CG  GLU   141      72.525  79.020  61.323  1.00  0.00
ATOM   1134  CD  GLU   141      74.054  78.808  61.058  1.00  0.00
ATOM   1135  OE1 GLU   141      74.654  79.520  60.275  1.00  0.00
ATOM   1136  OE2 GLU   141      74.584  77.822  61.705  1.00  0.00
ATOM   1137  C   GLU   141      70.893  78.629  58.571  1.00  0.00
ATOM   1138  O   GLU   141      71.327  77.586  58.112  1.00  0.00
ATOM   1139  N   ILE   142      69.540  78.800  58.741  1.00  0.00
ATOM   1140  CA  ILE   142      68.598  77.752  58.485  1.00  0.00
ATOM   1141  CB  ILE   142      67.236  78.110  59.121  1.00  0.00
ATOM   1142  CG2 ILE   142      66.112  77.069  58.896  1.00  0.00
ATOM   1143  CG1 ILE   142      67.461  78.411  60.681  1.00  0.00
ATOM   1144  CD1 ILE   142      67.903  77.344  61.660  1.00  0.00
ATOM   1145  C   ILE   142      68.565  77.375  56.988  1.00  0.00
ATOM   1146  O   ILE   142      68.334  76.157  56.710  1.00  0.00
ATOM   1147  N   ALA   143      68.816  78.345  56.067  1.00  0.00
ATOM   1148  CA  ALA   143      68.962  77.989  54.646  1.00  0.00
ATOM   1149  CB  ALA   143      69.266  79.249  53.842  1.00  0.00
ATOM   1150  C   ALA   143      70.119  77.030  54.464  1.00  0.00
ATOM   1151  O   ALA   143      69.949  75.873  54.112  1.00  0.00
ATOM   1152  N   ARG   144      71.364  77.436  54.821  1.00  0.00
ATOM   1153  CA  ARG   144      72.467  76.641  54.469  1.00  0.00
ATOM   1154  CB  ARG   144      73.768  77.446  54.504  1.00  0.00
ATOM   1155  CG  ARG   144      74.307  77.716  55.899  1.00  0.00
ATOM   1156  CD  ARG   144      75.286  78.851  55.993  1.00  0.00
ATOM   1157  NE  ARG   144      75.706  78.936  57.386  1.00  0.00
ATOM   1158  CZ  ARG   144      76.975  79.292  57.758  1.00  0.00
ATOM   1159  NH1 ARG   144      77.179  79.623  58.969  1.00  0.00
ATOM   1160  NH2 ARG   144      78.033  79.265  56.996  1.00  0.00
ATOM   1161  C   ARG   144      72.580  75.277  55.184  1.00  0.00
ATOM   1162  O   ARG   144      73.205  74.304  54.654  1.00  0.00
ATOM   1163  N   ARG   145      71.975  75.202  56.367  1.00  0.00
ATOM   1164  CA  ARG   145      71.814  73.923  57.050  1.00  0.00
ATOM   1165  CB  ARG   145      71.574  74.093  58.630  1.00  0.00
ATOM   1166  CG  ARG   145      72.790  74.621  59.329  1.00  0.00
ATOM   1167  CD  ARG   145      72.501  74.787  60.812  1.00  0.00
ATOM   1168  NE  ARG   145      73.708  75.163  61.458  1.00  0.00
ATOM   1169  CZ  ARG   145      74.508  74.506  62.313  1.00  0.00
ATOM   1170  NH1 ARG   145      75.453  75.218  62.846  1.00  0.00
ATOM   1171  NH2 ARG   145      74.431  73.273  62.542  1.00  0.00
ATOM   1172  C   ARG   145      70.667  73.099  56.425  1.00  0.00
ATOM   1173  O   ARG   145      70.870  71.942  56.169  1.00  0.00
ATOM   1174  N   HIE   146      69.489  73.702  56.134  1.00  0.00
ATOM   1175  CA  HIE   146      68.278  72.963  55.678  1.00  0.00
ATOM   1176  CB  HIE   146      67.196  73.008  56.770  1.00  0.00
ATOM   1177  CG  HIE   146      67.766  72.775  58.132  1.00  0.00
ATOM   1178  ND1 HIE   146      67.865  71.471  58.636  1.00  0.00
ATOM   1179  CE1 HIE   146      68.222  71.644  59.910  1.00  0.00
ATOM   1180  NE2 HIE   146      68.366  72.958  60.201  1.00  0.00
ATOM   1181  CD2 HIE   146      68.109  73.664  59.116  1.00  0.00
ATOM   1182  C   HIE   146      67.838  73.335  54.246  1.00  0.00
ATOM   1183  O   HIE   146      66.901  74.105  54.114  1.00  0.00
ATOM   1184  N   PRO   147      68.436  72.894  53.130  1.00  0.00
ATOM   1185  CD  PRO   147      69.632  72.059  53.168  1.00  0.00
ATOM   1186  CG  PRO   147      69.792  71.592  51.712  1.00  0.00
ATOM   1187  CB  PRO   147      69.316  72.833  50.885  1.00  0.00
ATOM   1188  CA  PRO   147      68.171  73.355  51.760  1.00  0.00
ATOM   1189  C   PRO   147      66.825  73.037  51.241  1.00  0.00
ATOM   1190  O   PRO   147      66.260  73.674  50.320  1.00  0.00
ATOM   1191  N   TYR   148      66.220  71.938  51.847  1.00  0.00
ATOM   1192  CA  TYR   148      64.887  71.452  51.415  1.00  0.00
ATOM   1193  CB  TYR   148      64.805  69.986  51.425  1.00  0.00
ATOM   1194  CG  TYR   148      65.004  69.384  50.065  1.00  0.00
ATOM   1195  CD1 TYR   148      63.951  69.335  49.113  1.00  0.00
ATOM   1196  CE1 TYR   148      64.130  68.866  47.808  1.00  0.00
ATOM   1197  CZ  TYR   148      65.384  68.358  47.434  1.00  0.00
ATOM   1198  OH  TYR   148      65.606  67.952  46.176  1.00  0.00
ATOM   1199  CE2 TYR   148      66.443  68.419  48.358  1.00  0.00
ATOM   1200  CD2 TYR   148      66.256  68.987  49.719  1.00  0.00
ATOM   1201  C   TYR   148      63.742  72.025  52.287  1.00  0.00
ATOM   1202  O   TYR   148      62.519  71.774  52.201  1.00  0.00
ATOM   1203  N   PHE   149      64.072  72.825  53.324  1.00  0.00
ATOM   1204  CA  PHE   149      63.110  73.479  54.256  1.00  0.00
ATOM   1205  CB  PHE   149      63.930  74.121  55.423  1.00  0.00
ATOM   1206  CG  PHE   149      63.166  74.384  56.681  1.00  0.00
ATOM   1207  CD1 PHE   149      62.082  75.301  56.672  1.00  0.00
ATOM   1208  CE1 PHE   149      61.290  75.499  57.830  1.00  0.00
ATOM   1209  CZ  PHE   149      61.709  74.887  58.984  1.00  0.00
ATOM   1210  CE2 PHE   149      62.891  74.101  59.040  1.00  0.00
ATOM   1211  CD2 PHE   149      63.559  73.723  57.849  1.00  0.00
ATOM   1212  C   PHE   149      62.310  74.499  53.416  1.00  0.00
ATOM   1213  O   PHE   149      62.811  75.352  52.667  1.00  0.00
ATOM   1214  N   TYR   150      60.995  74.413  53.485  1.00  0.00
ATOM   1215  CA  TYR   150      60.013  75.144  52.657  1.00  0.00
ATOM   1216  CB  TYR   150      58.609  74.578  52.901  1.00  0.00
ATOM   1217  CG  TYR   150      57.379  75.216  52.208  1.00  0.00
ATOM   1218  CD1 TYR   150      57.173  75.074  50.858  1.00  0.00
ATOM   1219  CE1 TYR   150      56.115  75.654  50.256  1.00  0.00
ATOM   1220  CZ  TYR   150      55.212  76.469  50.958  1.00  0.00
ATOM   1221  OH  TYR   150      54.094  77.019  50.361  1.00  0.00
ATOM   1222  CE2 TYR   150      55.347  76.601  52.388  1.00  0.00
ATOM   1223  CD2 TYR   150      56.478  75.966  53.000  1.00  0.00
ATOM   1224  C   TYR   150      60.106  76.664  52.895  1.00  0.00
ATOM   1225  O   TYR   150      59.766  77.083  54.013  1.00  0.00
ATOM   1226  N   ALA   151      60.570  77.459  51.937  1.00  0.00
ATOM   1227  CA  ALA   151      60.961  78.814  52.125  1.00  0.00
ATOM   1228  CB  ALA   151      61.724  79.320  50.897  1.00  0.00
ATOM   1229  C   ALA   151      59.870  79.788  52.563  1.00  0.00
ATOM   1230  O   ALA   151      60.116  80.551  53.486  1.00  0.00
ATOM   1231  N   PRO   152      58.606  79.862  52.041  1.00  0.00
ATOM   1232  CD  PRO   152      58.169  79.040  50.954  1.00  0.00
ATOM   1233  CG  PRO   152      56.838  79.542  50.548  1.00  0.00
ATOM   1234  CB  PRO   152      56.249  80.224  51.792  1.00  0.00
ATOM   1235  CA  PRO   152      57.507  80.675  52.565  1.00  0.00
ATOM   1236  C   PRO   152      57.349  80.453  54.095  1.00  0.00
ATOM   1237  O   PRO   152      56.998  81.450  54.671  1.00  0.00
ATOM   1238  N   GLU   153      57.597  79.252  54.651  1.00  0.00
ATOM   1239  CA  GLU   153      57.488  79.132  56.079  1.00  0.00
ATOM   1240  CB  GLU   153      56.892  77.731  56.405  1.00  0.00
ATOM   1241  CG  GLU   153      55.467  77.657  55.835  1.00  0.00
ATOM   1242  CD  GLU   153      54.503  78.355  56.817  1.00  0.00
ATOM   1243  OE1 GLU   153      54.364  79.653  56.728  1.00  0.00
ATOM   1244  OE2 GLU   153      53.815  77.600  57.584  1.00  0.00
ATOM   1245  C   GLU   153      58.719  79.428  56.852  1.00  0.00
ATOM   1246  O   GLU   153      58.559  79.449  58.057  1.00  0.00
ATOM   1247  N   LEU   154      59.843  79.710  56.206  1.00  0.00
ATOM   1248  CA  LEU   154      61.015  80.242  56.868  1.00  0.00
ATOM   1249  CB  LEU   154      62.329  80.192  56.075  1.00  0.00
ATOM   1250  CG  LEU   154      62.856  78.691  56.095  1.00  0.00
ATOM   1251  CD1 LEU   154      63.886  78.509  55.020  1.00  0.00
ATOM   1252  CD2 LEU   154      63.485  78.418  57.516  1.00  0.00
ATOM   1253  C   LEU   154      60.714  81.707  57.327  1.00  0.00
ATOM   1254  O   LEU   154      61.234  82.115  58.372  1.00  0.00
ATOM   1255  N   LEU   155      59.824  82.394  56.610  1.00  0.00
ATOM   1256  CA  LEU   155      59.479  83.759  56.968  1.00  0.00
ATOM   1257  CB  LEU   155      58.681  84.425  55.840  1.00  0.00
ATOM   1258  CG  LEU   155      59.387  84.725  54.479  1.00  0.00
ATOM   1259  CD1 LEU   155      58.214  85.234  53.652  1.00  0.00
ATOM   1260  CD2 LEU   155      60.373  85.876  54.473  1.00  0.00
ATOM   1261  C   LEU   155      58.719  83.798  58.321  1.00  0.00
ATOM   1262  O   LEU   155      58.907  84.794  59.043  1.00  0.00
ATOM   1263  N   PHE   156      58.017  82.716  58.629  1.00  0.00
ATOM   1264  CA  PHE   156      57.399  82.451  59.918  1.00  0.00
ATOM   1265  CB  PHE   156      56.249  81.448  59.716  1.00  0.00
ATOM   1266  CG  PHE   156      55.411  81.371  61.019  1.00  0.00
ATOM   1267  CD1 PHE   156      55.356  80.165  61.801  1.00  0.00
ATOM   1268  CE1 PHE   156      54.362  80.007  62.787  1.00  0.00
ATOM   1269  CZ  PHE   156      53.485  81.027  62.955  1.00  0.00
ATOM   1270  CE2 PHE   156      53.555  82.236  62.273  1.00  0.00
ATOM   1271  CD2 PHE   156      54.546  82.468  61.356  1.00  0.00
ATOM   1272  C   PHE   156      58.457  82.053  61.047  1.00  0.00
ATOM   1273  O   PHE   156      58.345  82.392  62.183  1.00  0.00
ATOM   1274  N   PHE   157      59.461  81.326  60.687  1.00  0.00
ATOM   1275  CA  PHE   157      60.581  80.715  61.550  1.00  0.00
ATOM   1276  CB  PHE   157      61.414  79.638  60.821  1.00  0.00
ATOM   1277  CG  PHE   157      61.925  78.542  61.682  1.00  0.00
ATOM   1278  CD1 PHE   157      61.141  77.402  61.887  1.00  0.00
ATOM   1279  CE1 PHE   157      61.722  76.282  62.512  1.00  0.00
ATOM   1280  CZ  PHE   157      62.998  76.255  63.038  1.00  0.00
ATOM   1281  CE2 PHE   157      63.752  77.426  62.896  1.00  0.00
ATOM   1282  CD2 PHE   157      63.200  78.580  62.289  1.00  0.00
ATOM   1283  C   PHE   157      61.453  81.915  62.045  1.00  0.00
ATOM   1284  O   PHE   157      61.943  81.901  63.207  1.00  0.00
ATOM   1285  N   ALA   158      61.603  83.008  61.241  1.00  0.00
ATOM   1286  CA  ALA   158      62.237  84.234  61.717  1.00  0.00
ATOM   1287  CB  ALA   158      62.414  85.150  60.479  1.00  0.00
ATOM   1288  C   ALA   158      61.471  84.957  62.864  1.00  0.00
ATOM   1289  O   ALA   158      62.109  85.608  63.719  1.00  0.00
ATOM   1290  N   LYS   159      60.167  84.717  63.021  1.00  0.00
ATOM   1291  CA  LYS   159      59.286  85.241  64.030  1.00  0.00
ATOM   1292  CB  LYS   159      57.899  85.529  63.505  1.00  0.00
ATOM   1293  CG  LYS   159      57.892  86.687  62.469  1.00  0.00
ATOM   1294  CD  LYS   159      56.517  86.783  61.801  1.00  0.00
ATOM   1295  CE  LYS   159      56.615  88.166  61.150  1.00  0.00
ATOM   1296  NZ  LYS   159      55.546  88.286  60.119  1.00  0.00
ATOM   1297  C   LYS   159      59.342  84.449  65.329  1.00  0.00
ATOM   1298  O   LYS   159      59.621  85.102  66.265  1.00  0.00
ATOM   1299  N   ARG   160      59.179  83.103  65.387  1.00  0.00
ATOM   1300  CA  ARG   160      59.568  82.323  66.577  1.00  0.00
ATOM   1301  CB  ARG   160      59.368  80.857  66.198  1.00  0.00
ATOM   1302  CG  ARG   160      57.929  80.327  65.925  1.00  0.00
ATOM   1303  CD  ARG   160      57.883  78.906  65.326  1.00  0.00
ATOM   1304  NE  ARG   160      58.325  77.913  66.320  1.00  0.00
ATOM   1305  CZ  ARG   160      58.719  76.655  66.107  1.00  0.00
ATOM   1306  NH1 ARG   160      59.154  75.790  67.045  1.00  0.00
ATOM   1307  NH2 ARG   160      58.749  76.146  64.952  1.00  0.00
ATOM   1308  C   ARG   160      60.961  82.650  66.950  1.00  0.00
ATOM   1309  O   ARG   160      61.216  82.685  68.163  1.00  0.00
ATOM   1310  N   TYR   161      61.852  83.064  66.069  1.00  0.00
ATOM   1311  CA  TYR   161      63.230  83.427  66.499  1.00  0.00
ATOM   1312  CB  TYR   161      64.209  83.330  65.254  1.00  0.00
ATOM   1313  CG  TYR   161      65.633  83.704  65.604  1.00  0.00
ATOM   1314  CD1 TYR   161      66.444  82.757  66.274  1.00  0.00
ATOM   1315  CE1 TYR   161      67.828  82.894  66.214  1.00  0.00
ATOM   1316  CZ  TYR   161      68.436  84.070  65.653  1.00  0.00
ATOM   1317  OH  TYR   161      69.816  84.134  65.625  1.00  0.00
ATOM   1318  CE2 TYR   161      67.582  85.063  65.058  1.00  0.00
ATOM   1319  CD2 TYR   161      66.181  84.822  64.946  1.00  0.00
ATOM   1320  C   TYR   161      63.281  84.796  67.282  1.00  0.00
ATOM   1321  O   TYR   161      63.857  84.829  68.392  1.00  0.00
ATOM   1322  N   LYS   162      62.501  85.746  66.732  1.00  0.00
ATOM   1323  CA  LYS   162      62.338  87.071  67.193  1.00  0.00
ATOM   1324  CB  LYS   162      61.623  87.858  66.140  1.00  0.00
ATOM   1325  CG  LYS   162      61.728  89.349  66.421  1.00  0.00
ATOM   1326  CD  LYS   162      61.147  90.123  65.274  1.00  0.00
ATOM   1327  CE  LYS   162      61.243  91.638  65.635  1.00  0.00
ATOM   1328  NZ  LYS   162      60.696  92.533  64.613  1.00  0.00
ATOM   1329  C   LYS   162      61.636  87.128  68.594  1.00  0.00
ATOM   1330  O   LYS   162      61.967  87.861  69.533  1.00  0.00
ATOM   1331  N   ALA   163      60.725  86.203  68.773  1.00  0.00
ATOM   1332  CA  ALA   163      60.094  85.906  70.026  1.00  0.00
ATOM   1333  CB  ALA   163      58.901  84.969  69.870  1.00  0.00
ATOM   1334  C   ALA   163      60.997  85.333  71.166  1.00  0.00
ATOM   1335  O   ALA   163      60.638  85.497  72.309  1.00  0.00
ATOM   1336  N   ALA   164      62.125  84.665  70.846  1.00  0.00
ATOM   1337  CA  ALA   164      63.149  84.235  71.823  1.00  0.00
ATOM   1338  CB  ALA   164      64.173  83.280  71.249  1.00  0.00
ATOM   1339  C   ALA   164      63.850  85.486  72.499  1.00  0.00
ATOM   1340  O   ALA   164      63.924  85.549  73.704  1.00  0.00
ATOM   1341  N   PHE   165      64.311  86.471  71.735  1.00  0.00
ATOM   1342  CA  PHE   165      65.119  87.615  72.171  1.00  0.00
ATOM   1343  CB  PHE   165      65.982  88.080  70.959  1.00  0.00
ATOM   1344  CG  PHE   165      67.001  86.986  70.417  1.00  0.00
ATOM   1345  CD1 PHE   165      68.251  86.852  71.038  1.00  0.00
ATOM   1346  CE1 PHE   165      69.041  85.705  70.838  1.00  0.00
ATOM   1347  CZ  PHE   165      68.634  84.745  69.899  1.00  0.00
ATOM   1348  CE2 PHE   165      67.384  84.839  69.275  1.00  0.00
ATOM   1349  CD2 PHE   165      66.551  85.909  69.547  1.00  0.00
ATOM   1350  C   PHE   165      64.320  88.773  72.686  1.00  0.00
ATOM   1351  O   PHE   165      64.692  89.415  73.702  1.00  0.00
ATOM   1352  N   THR   166      63.120  89.115  72.114  1.00  0.00
ATOM   1353  CA  THR   166      62.165  90.012  72.737  1.00  0.00
ATOM   1354  CB  THR   166      60.841  90.132  71.914  1.00  0.00
ATOM   1355  CG2 THR   166      61.052  90.938  70.630  1.00  0.00
ATOM   1356  OG1 THR   166      60.306  88.905  71.507  1.00  0.00
ATOM   1357  C   THR   166      61.818  89.634  74.149  1.00  0.00
ATOM   1358  O   THR   166      61.575  90.462  74.957  1.00  0.00
ATOM   1359  N   GLU   167      61.786  88.334  74.470  1.00  0.00
ATOM   1360  CA  GLU   167      61.386  87.837  75.838  1.00  0.00
ATOM   1361  CB  GLU   167      60.326  86.719  75.738  1.00  0.00
ATOM   1362  CG  GLU   167      59.055  87.055  74.856  1.00  0.00
ATOM   1363  CD  GLU   167      58.003  87.803  75.732  1.00  0.00
ATOM   1364  OE1 GLU   167      58.136  87.802  76.921  1.00  0.00
ATOM   1365  OE2 GLU   167      57.114  88.364  75.140  1.00  0.00
ATOM   1366  C   GLU   167      62.494  87.419  76.887  1.00  0.00
ATOM   1367  O   GLU   167      62.080  86.922  77.933  1.00  0.00
ATOM   1368  N   CYX   168      63.809  87.418  76.409  1.00  0.00
ATOM   1369  CA  CYX   168      64.884  87.069  77.370  1.00  0.00
ATOM   1370  CB  CYX   168      65.463  85.740  76.975  1.00  0.00
ATOM   1371  SG  CYX   168      64.282  84.375  77.392  1.00  0.00
ATOM   1372  C   CYX   168      66.059  88.047  77.511  1.00  0.00
ATOM   1373  O   CYX   168      66.853  87.866  78.395  1.00  0.00
ATOM   1374  N   CYX   169      66.344  89.069  76.674  1.00  0.00
ATOM   1375  CA  CYX   169      67.610  89.918  76.734  1.00  0.00
ATOM   1376  CB  CYX   169      67.731  90.690  75.419  1.00  0.00
ATOM   1377  SG  CYX   169      68.195  89.698  73.953  1.00  0.00
ATOM   1378  C   CYX   169      67.642  90.896  77.920  1.00  0.00
ATOM   1379  O   CYX   169      68.490  91.787  78.029  1.00  0.00
ATOM   1380  N   GLN   170      66.660  90.806  78.746  1.00  0.00
ATOM   1381  CA  GLN   170      66.441  91.528  80.030  1.00  0.00
ATOM   1382  CB  GLN   170      65.181  92.421  79.910  1.00  0.00
ATOM   1383  CG  GLN   170      63.834  91.841  80.188  1.00  0.00
ATOM   1384  CD  GLN   170      63.427  90.812  79.057  1.00  0.00
ATOM   1385  OE1 GLN   170      63.895  89.683  78.935  1.00  0.00
ATOM   1386  NE2 GLN   170      62.901  91.409  78.008  1.00  0.00
ATOM   1387  C   GLN   170      66.441  90.652  81.284  1.00  0.00
ATOM   1388  O   GLN   170      66.302  91.225  82.398  1.00  0.00
ATOM   1389  N   ALA   171      66.567  89.347  81.035  1.00  0.00
ATOM   1390  CA  ALA   171      66.617  88.406  82.141  1.00  0.00
ATOM   1391  CB  ALA   171      66.193  87.070  81.598  1.00  0.00
ATOM   1392  C   ALA   171      67.993  88.300  82.782  1.00  0.00
ATOM   1393  O   ALA   171      68.998  88.457  82.073  1.00  0.00
ATOM   1394  N   ALA   172      68.078  88.032  84.076  1.00  0.00
ATOM   1395  CA  ALA   172      69.346  88.115  84.863  1.00  0.00
ATOM   1396  CB  ALA   172      68.975  87.755  86.341  1.00  0.00
ATOM   1397  C   ALA   172      70.430  87.181  84.305  1.00  0.00
ATOM   1398  O   ALA   172      71.579  87.650  84.350  1.00  0.00
ATOM   1399  N   ASP   173      70.013  85.984  83.837  1.00  0.00
ATOM   1400  CA  ASP   173      70.802  85.138  82.925  1.00  0.00
ATOM   1401  CB  ASP   173      71.167  83.807  83.542  1.00  0.00
ATOM   1402  CG  ASP   173      72.169  83.095  82.727  1.00  0.00
ATOM   1403  OD1 ASP   173      72.247  83.406  81.529  1.00  0.00
ATOM   1404  OD2 ASP   173      72.854  82.202  83.235  1.00  0.00
ATOM   1405  C   ASP   173      69.962  85.120  81.662  1.00  0.00
ATOM   1406  O   ASP   173      68.895  84.482  81.605  1.00  0.00
ATOM   1407  N   LYS   174      70.440  85.701  80.602  1.00  0.00
ATOM   1408  CA  LYS   174      69.803  85.796  79.248  1.00  0.00
ATOM   1409  CB  LYS   174      70.367  86.852  78.296  1.00  0.00
ATOM   1410  CG  LYS   174      70.308  88.341  78.824  1.00  0.00
ATOM   1411  CD  LYS   174      70.984  89.396  78.029  1.00  0.00
ATOM   1412  CE  LYS   174      72.449  89.662  78.380  1.00  0.00
ATOM   1413  NZ  LYS   174      72.673  90.248  79.712  1.00  0.00
ATOM   1414  C   LYS   174      70.053  84.437  78.553  1.00  0.00
ATOM   1415  O   LYS   174      69.249  84.005  77.741  1.00  0.00
ATOM   1416  N   ALA   175      71.198  83.845  78.821  1.00  0.00
ATOM   1417  CA  ALA   175      71.503  82.542  78.232  1.00  0.00
ATOM   1418  CB  ALA   175      73.005  82.268  78.525  1.00  0.00
ATOM   1419  C   ALA   175      70.501  81.532  78.688  1.00  0.00
ATOM   1420  O   ALA   175      69.726  80.939  77.921  1.00  0.00
ATOM   1421  N   ALA   176      70.369  81.323  80.020  1.00  0.00
ATOM   1422  CA  ALA   176      69.483  80.378  80.718  1.00  0.00
ATOM   1423  CB  ALA   176      69.665  80.599  82.178  1.00  0.00
ATOM   1424  C   ALA   176      67.991  80.514  80.320  1.00  0.00
ATOM   1425  O   ALA   176      67.307  79.515  80.265  1.00  0.00
ATOM   1426  N   CYX   177      67.622  81.766  79.923  1.00  0.00
ATOM   1427  CA  CYX   177      66.334  82.079  79.392  1.00  0.00
ATOM   1428  CB  CYX   177      66.149  83.634  79.630  1.00  0.00
ATOM   1429  SG  CYX   177      64.453  84.209  79.412  1.00  0.00
ATOM   1430  C   CYX   177      66.124  81.684  77.882  1.00  0.00
ATOM   1431  O   CYX   177      65.068  81.279  77.485  1.00  0.00
ATOM   1432  N   LEU   178      67.139  81.892  77.092  1.00  0.00
ATOM   1433  CA  LEU   178      67.137  81.686  75.631  1.00  0.00
ATOM   1434  CB  LEU   178      68.389  82.436  75.029  1.00  0.00
ATOM   1435  CG  LEU   178      68.217  83.901  74.751  1.00  0.00
ATOM   1436  CD1 LEU   178      69.572  84.460  74.313  1.00  0.00
ATOM   1437  CD2 LEU   178      67.173  84.251  73.685  1.00  0.00
ATOM   1438  C   LEU   178      67.140  80.249  75.156  1.00  0.00
ATOM   1439  O   LEU   178      66.389  79.827  74.256  1.00  0.00
ATOM   1440  N   LEU   179      68.121  79.546  75.726  1.00  0.00
ATOM   1441  CA  LEU   179      68.718  78.262  75.350  1.00  0.00
ATOM   1442  CB  LEU   179      69.767  77.891  76.353  1.00  0.00
ATOM   1443  CG  LEU   179      71.213  78.462  76.066  1.00  0.00
ATOM   1444  CD1 LEU   179      72.019  78.538  77.385  1.00  0.00
ATOM   1445  CD2 LEU   179      71.952  77.684  75.001  1.00  0.00
ATOM   1446  C   LEU   179      67.664  77.138  75.125  1.00  0.00
ATOM   1447  O   LEU   179      67.668  76.478  74.136  1.00  0.00
ATOM   1448  N   PRO   180      66.611  76.983  75.964  1.00  0.00
ATOM   1449  CD  PRO   180      66.414  77.610  77.206  1.00  0.00
ATOM   1450  CG  PRO   180      65.467  76.663  78.089  1.00  0.00
ATOM   1451  CB  PRO   180      64.596  76.028  77.019  1.00  0.00
ATOM   1452  CA  PRO   180      65.524  75.953  75.757  1.00  0.00
ATOM   1453  C   PRO   180      64.787  76.223  74.441  1.00  0.00
ATOM   1454  O   PRO   180      64.485  75.350  73.634  1.00  0.00
ATOM   1455  N   LYS   181      64.365  77.481  74.316  1.00  0.00
ATOM   1456  CA  LYS   181      63.763  77.994  73.117  1.00  0.00
ATOM   1457  CB  LYS   181      63.290  79.455  73.330  1.00  0.00
ATOM   1458  CG  LYS   181      62.759  79.932  74.692  1.00  0.00
ATOM   1459  CD  LYS   181      62.452  81.451  74.696  1.00  0.00
ATOM   1460  CE  LYS   181      61.605  81.867  75.967  1.00  0.00
ATOM   1461  NZ  LYS   181      62.363  81.705  77.213  1.00  0.00
ATOM   1462  C   LYS   181      64.589  77.931  71.894  1.00  0.00
ATOM   1463  O   LYS   181      64.040  77.867  70.749  1.00  0.00
ATOM   1464  N   LEU   182      65.900  78.169  72.019  1.00  0.00
ATOM   1465  CA  LEU   182      66.790  78.028  70.898  1.00  0.00
ATOM   1466  CB  LEU   182      68.155  78.615  71.247  1.00  0.00
ATOM   1467  CG  LEU   182      68.284  80.154  71.213  1.00  0.00
ATOM   1468  CD1 LEU   182      69.710  80.585  71.629  1.00  0.00
ATOM   1469  CD2 LEU   182      68.040  80.658  69.842  1.00  0.00
ATOM   1470  C   LEU   182      66.888  76.537  70.468  1.00  0.00
ATOM   1471  O   LEU   182      66.837  76.235  69.302  1.00  0.00
ATOM   1472  N   ASP   183      66.924  75.611  71.401  1.00  0.00
ATOM   1473  CA  ASP   183      67.024  74.211  71.174  1.00  0.00
ATOM   1474  CB  ASP   183      67.394  73.550  72.534  1.00  0.00
ATOM   1475  CG  ASP   183      67.523  72.028  72.389  1.00  0.00
ATOM   1476  OD1 ASP   183      68.373  71.452  71.654  1.00  0.00
ATOM   1477  OD2 ASP   183      66.665  71.350  73.043  1.00  0.00
ATOM   1478  C   ASP   183      65.705  73.704  70.568  1.00  0.00
ATOM   1479  O   ASP   183      65.628  72.655  69.986  1.00  0.00
ATOM   1480  N   GLU   184      64.623  74.435  70.826  1.00  0.00
ATOM   1481  CA  GLU   184      63.235  74.066  70.240  1.00  0.00
ATOM   1482  CB  GLU   184      62.194  74.800  71.179  1.00  0.00
ATOM   1483  CG  GLU   184      61.200  73.777  71.837  1.00  0.00
ATOM   1484  CD  GLU   184      60.132  74.440  72.757  1.00  0.00
ATOM   1485  OE1 GLU   184      59.098  74.913  72.192  1.00  0.00
ATOM   1486  OE2 GLU   184      60.249  74.333  74.022  1.00  0.00
ATOM   1487  C   GLU   184      63.057  74.482  68.758  1.00  0.00
ATOM   1488  O   GLU   184      62.085  74.048  68.119  1.00  0.00
ATOM   1489  N   LEU   185      63.892  75.354  68.237  1.00  0.00
ATOM   1490  CA  LEU   185      64.067  75.810  66.896  1.00  0.00
ATOM   1491  CB  LEU   185      64.392  77.338  66.882  1.00  0.00
ATOM   1492  CG  LEU   185      63.222  78.158  67.478  1.00  0.00
ATOM   1493  CD1 LEU   185      63.466  79.600  67.253  1.00  0.00
ATOM   1494  CD2 LEU   185      61.892  77.848  66.730  1.00  0.00
ATOM   1495  C   LEU   185      65.207  75.004  66.265  1.00  0.00
ATOM   1496  O   LEU   185      65.321  74.991  64.998  1.00  0.00
ATOM   1497  N   ARG   186      66.093  74.444  67.097  1.00  0.00
ATOM   1498  CA  ARG   186      67.034  73.351  66.564  1.00  0.00
ATOM   1499  CB  ARG   186      68.232  73.225  67.545  1.00  0.00
ATOM   1500  CG  ARG   186      69.485  72.534  67.041  1.00  0.00
ATOM   1501  CD  ARG   186      70.684  72.722  67.953  1.00  0.00
ATOM   1502  NE  ARG   186      70.539  72.303  69.353  1.00  0.00
ATOM   1503  CZ  ARG   186      71.417  72.479  70.318  1.00  0.00
ATOM   1504  NH1 ARG   186      71.063  72.186  71.562  1.00  0.00
ATOM   1505  NH2 ARG   186      72.622  72.928  70.157  1.00  0.00
ATOM   1506  C   ARG   186      66.352  71.976  66.124  1.00  0.00
ATOM   1507  O   ARG   186      66.685  71.378  65.103  1.00  0.00
ATOM   1508  N   ASP   187      65.513  71.477  66.998  1.00  0.00
ATOM   1509  CA  ASP   187      64.969  70.123  67.077  1.00  0.00
ATOM   1510  CB  ASP   187      64.050  69.962  68.284  1.00  0.00
ATOM   1511  CG  ASP   187      63.463  68.498  68.541  1.00  0.00
ATOM   1512  OD1 ASP   187      64.154  67.677  69.174  1.00  0.00
ATOM   1513  OD2 ASP   187      62.354  68.203  68.114  1.00  0.00
ATOM   1514  C   ASP   187      64.204  69.635  65.851  1.00  0.00
ATOM   1515  O   ASP   187      64.298  68.488  65.467  1.00  0.00
ATOM   1516  N   GLU   188      63.531  70.535  65.208  1.00  0.00
ATOM   1517  CA  GLU   188      62.598  70.263  64.053  1.00  0.00
ATOM   1518  CB  GLU   188      61.201  70.904  64.322  1.00  0.00
ATOM   1519  CG  GLU   188      61.372  72.364  64.396  1.00  0.00
ATOM   1520  CD  GLU   188      60.071  73.066  64.788  1.00  0.00
ATOM   1521  OE1 GLU   188      59.719  73.191  65.996  1.00  0.00
ATOM   1522  OE2 GLU   188      59.432  73.618  63.871  1.00  0.00
ATOM   1523  C   GLU   188      63.178  70.670  62.702  1.00  0.00
ATOM   1524  O   GLU   188      62.396  70.536  61.750  1.00  0.00
ATOM   1525  N   GLY   189      64.426  71.046  62.636  1.00  0.00
ATOM   1526  CA  GLY   189      65.110  71.305  61.408  1.00  0.00
ATOM   1527  C   GLY   189      65.074  70.149  60.334  1.00  0.00
ATOM   1528  O   GLY   189      64.355  70.219  59.334  1.00  0.00
ATOM   1529  N   LYN   190      65.853  69.061  60.559  1.00  0.00
ATOM   1530  CA  LYN   190      66.058  67.939  59.607  1.00  0.00
ATOM   1531  CB  LYN   190      67.189  67.004  60.178  1.00  0.00
ATOM   1532  CG  LYN   190      67.588  66.043  59.081  1.00  0.00
ATOM   1533  CD  LYN   190      68.852  65.288  59.447  1.00  0.00
ATOM   1534  CE  LYN   190      69.387  64.452  58.308  1.00  0.00
ATOM   1535  NZ  LYN   190      68.628  63.203  58.200  1.00  0.00
ATOM   1536  C   LYN   190      64.709  67.189  59.297  1.00  0.00
ATOM   1537  O   LYN   190      64.449  66.652  58.214  1.00  0.00
ATOM   1538  N   ALA   191      63.818  67.097  60.299  1.00  0.00
ATOM   1539  CA  ALA   191      62.456  66.552  60.144  1.00  0.00
ATOM   1540  CB  ALA   191      61.765  66.483  61.553  1.00  0.00
ATOM   1541  C   ALA   191      61.641  67.411  59.166  1.00  0.00
ATOM   1542  O   ALA   191      60.954  66.859  58.281  1.00  0.00
ATOM   1543  N   SER   192      61.656  68.756  59.228  1.00  0.00
ATOM   1544  CA  SER   192      60.872  69.594  58.332  1.00  0.00
ATOM   1545  CB  SER   192      61.079  71.078  58.687  1.00  0.00
ATOM   1546  OG  SER   192      60.724  71.375  60.027  1.00  0.00
ATOM   1547  C   SER   192      61.345  69.470  56.873  1.00  0.00
ATOM   1548  O   SER   192      60.575  69.148  55.958  1.00  0.00
ATOM   1549  N   SER   193      62.627  69.449  56.710  1.00  0.00
ATOM   1550  CA  SER   193      63.230  69.347  55.380  1.00  0.00
ATOM   1551  CB  SER   193      64.753  69.617  55.507  1.00  0.00
ATOM   1552  OG  SER   193      65.449  68.717  56.345  1.00  0.00
ATOM   1553  C   SER   193      63.002  67.940  54.771  1.00  0.00
ATOM   1554  O   SER   193      62.778  67.790  53.593  1.00  0.00
ATOM   1555  N   ALA   194      63.021  66.862  55.531  1.00  0.00
ATOM   1556  CA  ALA   194      62.630  65.529  55.021  1.00  0.00
ATOM   1557  CB  ALA   194      62.955  64.533  56.085  1.00  0.00
ATOM   1558  C   ALA   194      61.170  65.469  54.454  1.00  0.00
ATOM   1559  O   ALA   194      60.918  64.817  53.468  1.00  0.00
ATOM   1560  N   LYS   195      60.187  66.118  55.165  1.00  0.00
ATOM   1561  CA  LYS   195      58.771  66.254  54.777  1.00  0.00
ATOM   1562  CB  LYS   195      57.997  66.853  55.861  1.00  0.00
ATOM   1563  CG  LYS   195      57.998  66.032  57.154  1.00  0.00
ATOM   1564  CD  LYS   195      57.575  66.869  58.314  1.00  0.00
ATOM   1565  CE  LYS   195      57.952  66.128  59.592  1.00  0.00
ATOM   1566  NZ  LYS   195      57.183  66.827  60.671  1.00  0.00
ATOM   1567  C   LYS   195      58.611  66.937  53.415  1.00  0.00
ATOM   1568  O   LYS   195      58.082  66.313  52.549  1.00  0.00
ATOM   1569  N   GLN   196      59.449  67.961  53.162  1.00  0.00
ATOM   1570  CA  GLN   196      59.426  68.705  51.938  1.00  0.00
ATOM   1571  CB  GLN   196      59.897  70.111  52.132  1.00  0.00
ATOM   1572  CG  GLN   196      59.404  71.070  51.010  1.00  0.00
ATOM   1573  CD  GLN   196      57.857  71.196  51.112  1.00  0.00
ATOM   1574  OE1 GLN   196      57.220  71.290  52.151  1.00  0.00
ATOM   1575  NE2 GLN   196      57.317  71.416  49.966  1.00  0.00
ATOM   1576  C   GLN   196      60.152  67.813  50.825  1.00  0.00
ATOM   1577  O   GLN   196      59.807  67.786  49.623  1.00  0.00
ATOM   1578  N   ARG   197      61.203  67.062  51.272  1.00  0.00
ATOM   1579  CA  ARG   197      61.967  66.215  50.344  1.00  0.00
ATOM   1580  CB  ARG   197      63.331  65.813  50.983  1.00  0.00
ATOM   1581  CG  ARG   197      64.332  65.191  49.931  1.00  0.00
ATOM   1582  CD  ARG   197      65.732  65.064  50.530  1.00  0.00
ATOM   1583  NE  ARG   197      66.648  64.714  49.408  1.00  0.00
ATOM   1584  CZ  ARG   197      67.970  64.655  49.621  1.00  0.00
ATOM   1585  NH1 ARG   197      68.774  64.667  48.604  1.00  0.00
ATOM   1586  NH2 ARG   197      68.438  64.666  50.865  1.00  0.00
ATOM   1587  C   ARG   197      61.146  64.985  49.899  1.00  0.00
ATOM   1588  O   ARG   197      61.253  64.534  48.778  1.00  0.00
ATOM   1589  N   LEU   198      60.307  64.346  50.775  1.00  0.00
ATOM   1590  CA  LEU   198      59.324  63.375  50.352  1.00  0.00
ATOM   1591  CB  LEU   198      58.679  62.731  51.650  1.00  0.00
ATOM   1592  CG  LEU   198      59.486  61.641  52.388  1.00  0.00
ATOM   1593  CD1 LEU   198      59.053  61.613  53.807  1.00  0.00
ATOM   1594  CD2 LEU   198      59.204  60.280  51.715  1.00  0.00
ATOM   1595  C   LEU   198      58.131  63.970  49.526  1.00  0.00
ATOM   1596  O   LEU   198      57.503  63.372  48.601  1.00  0.00
ATOM   1597  N   LYN   199      57.783  65.174  49.862  1.00  0.00
ATOM   1598  CA  LYN   199      56.876  65.951  48.951  1.00  0.00
ATOM   1599  CB  LYN   199      56.527  67.324  49.468  1.00  0.00
ATOM   1600  CG  LYN   199      55.540  67.319  50.664  1.00  0.00
ATOM   1601  CD  LYN   199      54.977  68.745  50.977  1.00  0.00
ATOM   1602  CE  LYN   199      54.013  68.827  52.157  1.00  0.00
ATOM   1603  NZ  LYN   199      54.702  68.376  53.465  1.00  0.00
ATOM   1604  C   LYN   199      57.409  66.122  47.527  1.00  0.00
ATOM   1605  O   LYN   199      56.750  65.764  46.601  1.00  0.00
ATOM   1606  N   CYX   200      58.675  66.529  47.414  1.00  0.00
ATOM   1607  CA  CYX   200      59.287  66.606  46.065  1.00  0.00
ATOM   1608  CB  CYX   200      60.500  67.496  45.951  1.00  0.00
ATOM   1609  SG  CYX   200      60.293  69.235  46.027  1.00  0.00
ATOM   1610  C   CYX   200      59.573  65.270  45.458  1.00  0.00
ATOM   1611  O   CYX   200      59.628  65.189  44.237  1.00  0.00
ATOM   1612  N   ALA   201      59.908  64.212  46.213  1.00  0.00
ATOM   1613  CA  ALA   201      59.898  62.834  45.591  1.00  0.00
ATOM   1614  CB  ALA   201      60.468  61.975  46.647  1.00  0.00
ATOM   1615  C   ALA   201      58.490  62.424  45.049  1.00  0.00
ATOM   1616  O   ALA   201      58.511  61.844  44.026  1.00  0.00
ATOM   1617  N   SER   202      57.371  62.713  45.663  1.00  0.00
ATOM   1618  CA  SER   202      56.002  62.436  45.237  1.00  0.00
ATOM   1619  CB  SER   202      55.010  62.836  46.378  1.00  0.00
ATOM   1620  OG  SER   202      55.278  62.235  47.664  1.00  0.00
ATOM   1621  C   SER   202      55.657  63.166  43.960  1.00  0.00
ATOM   1622  O   SER   202      54.600  62.865  43.398  1.00  0.00
ATOM   1623  N   LEU   203      56.478  64.126  43.443  1.00  0.00
ATOM   1624  CA  LEU   203      56.337  64.706  42.038  1.00  0.00
ATOM   1625  CB  LEU   203      55.684  66.078  42.193  1.00  0.00
ATOM   1626  CG  LEU   203      56.407  67.193  42.872  1.00  0.00
ATOM   1627  CD1 LEU   203      57.314  68.028  41.933  1.00  0.00
ATOM   1628  CD2 LEU   203      55.563  68.290  43.544  1.00  0.00
ATOM   1629  C   LEU   203      57.531  64.638  41.082  1.00  0.00
ATOM   1630  O   LEU   203      57.499  64.999  39.909  1.00  0.00
ATOM   1631  N   GLN   204      58.667  64.055  41.475  1.00  0.00
ATOM   1632  CA  GLN   204      59.851  63.763  40.604  1.00  0.00
ATOM   1633  CB  GLN   204      60.976  64.660  41.060  1.00  0.00
ATOM   1634  CG  GLN   204      60.603  66.119  41.042  1.00  0.00
ATOM   1635  CD  GLN   204      61.777  67.059  41.420  1.00  0.00
ATOM   1636  OE1 GLN   204      62.792  66.702  42.011  1.00  0.00
ATOM   1637  NE2 GLN   204      61.615  68.339  41.219  1.00  0.00
ATOM   1638  C   GLN   204      60.380  62.327  40.686  1.00  0.00
ATOM   1639  O   GLN   204      60.682  61.723  39.622  1.00  0.00
ATOM   1640  N   LYS   205      60.466  61.691  41.882  1.00  0.00
ATOM   1641  CA  LYS   205      60.860  60.292  41.970  1.00  0.00
ATOM   1642  CB  LYS   205      61.352  59.876  43.350  1.00  0.00
ATOM   1643  CG  LYS   205      62.590  60.528  43.791  1.00  0.00
ATOM   1644  CD  LYS   205      63.781  59.911  43.056  1.00  0.00
ATOM   1645  CE  LYS   205      64.177  58.396  43.298  1.00  0.00
ATOM   1646  NZ  LYS   205      65.491  58.116  42.763  1.00  0.00
ATOM   1647  C   LYS   205      59.741  59.265  41.643  1.00  0.00
ATOM   1648  O   LYS   205      59.902  58.252  40.949  1.00  0.00
ATOM   1649  N   PHE   206      58.546  59.700  42.007  1.00  0.00
ATOM   1650  CA  PHE   206      57.270  59.226  41.668  1.00  0.00
ATOM   1651  CB  PHE   206      56.488  59.025  42.943  1.00  0.00
ATOM   1652  CG  PHE   206      57.049  57.862  43.710  1.00  0.00
ATOM   1653  CD1 PHE   206      56.680  56.466  43.571  1.00  0.00
ATOM   1654  CE1 PHE   206      57.500  55.424  44.028  1.00  0.00
ATOM   1655  CZ  PHE   206      58.579  55.722  44.904  1.00  0.00
ATOM   1656  CE2 PHE   206      58.843  57.056  45.235  1.00  0.00
ATOM   1657  CD2 PHE   206      58.106  58.106  44.609  1.00  0.00
ATOM   1658  C   PHE   206      56.443  60.210  40.747  1.00  0.00
ATOM   1659  O   PHE   206      56.924  61.329  40.554  1.00  0.00
ATOM   1660  N   GLY   207      55.388  59.672  40.113  1.00  0.00
ATOM   1661  CA  GLY   207      54.516  60.328  39.228  1.00  0.00
ATOM   1662  C   GLY   207      53.736  61.329  40.068  1.00  0.00
ATOM   1663  O   GLY   207      53.229  61.014  41.149  1.00  0.00
ATOM   1664  N   GLU   208      53.377  62.511  39.499  1.00  0.00
ATOM   1665  CA  GLU   208      52.632  63.527  40.196  1.00  0.00
ATOM   1666  CB  GLU   208      52.459  64.781  39.276  1.00  0.00
ATOM   1667  CG  GLU   208      52.062  66.174  39.813  1.00  0.00
ATOM   1668  CD  GLU   208      51.850  67.130  38.726  1.00  0.00
ATOM   1669  OE1 GLU   208      52.766  67.941  38.460  1.00  0.00
ATOM   1670  OE2 GLU   208      50.721  67.197  38.192  1.00  0.00
ATOM   1671  C   GLU   208      51.286  63.094  40.782  1.00  0.00
ATOM   1672  O   GLU   208      50.744  63.812  41.562  1.00  0.00
ATOM   1673  N   ARG   209      50.787  61.872  40.477  1.00  0.00
ATOM   1674  CA  ARG   209      49.613  61.276  41.101  1.00  0.00
ATOM   1675  CB  ARG   209      49.144  60.014  40.302  1.00  0.00
ATOM   1676  CG  ARG   209      47.833  59.461  40.748  1.00  0.00
ATOM   1677  CD  ARG   209      47.285  58.263  40.009  1.00  0.00
ATOM   1678  NE  ARG   209      48.244  57.106  40.034  1.00  0.00
ATOM   1679  CZ  ARG   209      48.168  56.087  40.817  1.00  0.00
ATOM   1680  NH1 ARG   209      48.998  55.089  40.677  1.00  0.00
ATOM   1681  NH2 ARG   209      47.324  55.926  41.811  1.00  0.00
ATOM   1682  C   ARG   209      49.866  60.972  42.539  1.00  0.00
ATOM   1683  O   ARG   209      48.962  61.028  43.358  1.00  0.00
ATOM   1684  N   ALA   210      51.158  60.665  42.916  1.00  0.00
ATOM   1685  CA  ALA   210      51.522  60.432  44.328  1.00  0.00
ATOM   1686  CB  ALA   210      52.976  59.862  44.369  1.00  0.00
ATOM   1687  C   ALA   210      51.327  61.770  45.133  1.00  0.00
ATOM   1688  O   ALA   210      50.752  61.724  46.207  1.00  0.00
ATOM   1689  N   PHE   211      51.758  62.916  44.597  1.00  0.00
ATOM   1690  CA  PHE   211      51.551  64.179  45.324  1.00  0.00
ATOM   1691  CB  PHE   211      52.370  65.366  44.724  1.00  0.00
ATOM   1692  CG  PHE   211      52.313  66.578  45.603  1.00  0.00
ATOM   1693  CD1 PHE   211      53.340  67.068  46.384  1.00  0.00
ATOM   1694  CE1 PHE   211      53.161  68.219  47.156  1.00  0.00
ATOM   1695  CZ  PHE   211      52.005  69.015  47.112  1.00  0.00
ATOM   1696  CE2 PHE   211      51.022  68.642  46.179  1.00  0.00
ATOM   1697  CD2 PHE   211      51.211  67.394  45.492  1.00  0.00
ATOM   1698  C   PHE   211      50.044  64.543  45.414  1.00  0.00
ATOM   1699  O   PHE   211      49.534  64.904  46.463  1.00  0.00
ATOM   1700  N   LYS   212      49.262  64.408  44.391  1.00  0.00
ATOM   1701  CA  LYS   212      47.805  64.709  44.272  1.00  0.00
ATOM   1702  CB  LYS   212      47.387  64.837  42.793  1.00  0.00
ATOM   1703  CG  LYS   212      47.747  66.176  42.252  1.00  0.00
ATOM   1704  CD  LYS   212      47.497  66.320  40.716  1.00  0.00
ATOM   1705  CE  LYS   212      48.309  65.361  39.890  1.00  0.00
ATOM   1706  NZ  LYS   212      48.371  65.780  38.459  1.00  0.00
ATOM   1707  C   LYS   212      46.967  63.786  45.104  1.00  0.00
ATOM   1708  O   LYS   212      46.039  64.223  45.694  1.00  0.00
ATOM   1709  N   ALA   213      47.403  62.551  45.328  1.00  0.00
ATOM   1710  CA  ALA   213      46.847  61.523  46.251  1.00  0.00
ATOM   1711  CB  ALA   213      47.470  60.150  46.026  1.00  0.00
ATOM   1712  C   ALA   213      46.951  61.890  47.766  1.00  0.00
ATOM   1713  O   ALA   213      45.913  61.845  48.440  1.00  0.00
ATOM   1714  N   TRP   214      48.181  62.409  48.128  1.00  0.00
ATOM   1715  CA  TRP   214      48.504  62.948  49.437  1.00  0.00
ATOM   1716  CB  TRP   214      50.059  63.243  49.492  1.00  0.00
ATOM   1717  CG  TRP   214      50.562  63.865  50.762  1.00  0.00
ATOM   1718  CD1 TRP   214      51.142  63.235  51.787  1.00  0.00
ATOM   1719  NE1 TRP   214      51.375  64.060  52.868  1.00  0.00
ATOM   1720  CE2 TRP   214      51.051  65.363  52.519  1.00  0.00
ATOM   1721  CZ2 TRP   214      51.109  66.547  53.318  1.00  0.00
ATOM   1722  CH2 TRP   214      50.836  67.756  52.679  1.00  0.00
ATOM   1723  CZ3 TRP   214      50.436  67.753  51.378  1.00  0.00
ATOM   1724  CE3 TRP   214      50.237  66.537  50.633  1.00  0.00
ATOM   1725  CD2 TRP   214      50.624  65.284  51.172  1.00  0.00
ATOM   1726  C   TRP   214      47.739  64.252  49.716  1.00  0.00
ATOM   1727  O   TRP   214      47.205  64.396  50.817  1.00  0.00
ATOM   1728  N   ALA   215      47.639  65.101  48.714  1.00  0.00
ATOM   1729  CA  ALA   215      46.979  66.417  48.711  1.00  0.00
ATOM   1730  CB  ALA   215      47.424  67.253  47.503  1.00  0.00
ATOM   1731  C   ALA   215      45.434  66.286  48.749  1.00  0.00
ATOM   1732  O   ALA   215      44.919  66.893  49.679  1.00  0.00
ATOM   1733  N   VAL   216      44.814  65.338  48.057  1.00  0.00
ATOM   1734  CA  VAL   216      43.360  65.112  48.054  1.00  0.00
ATOM   1735  CB  VAL   216      42.729  64.206  46.963  1.00  0.00
ATOM   1736  CG1 VAL   216      43.104  62.693  47.132  1.00  0.00
ATOM   1737  CG2 VAL   216      41.230  64.321  47.123  1.00  0.00
ATOM   1738  C   VAL   216      43.018  64.753  49.518  1.00  0.00
ATOM   1739  O   VAL   216      42.180  65.480  50.097  1.00  0.00
ATOM   1740  N   ALA   217      43.643  63.804  50.168  1.00  0.00
ATOM   1741  CA  ALA   217      43.361  63.383  51.513  1.00  0.00
ATOM   1742  CB  ALA   217      44.165  62.090  51.719  1.00  0.00
ATOM   1743  C   ALA   217      43.664  64.513  52.455  1.00  0.00
ATOM   1744  O   ALA   217      42.722  64.956  53.234  1.00  0.00
ATOM   1745  N   ARG   218      44.885  65.083  52.452  1.00  0.00
ATOM   1746  CA  ARG   218      45.317  66.216  53.281  1.00  0.00
ATOM   1747  CB  ARG   218      46.700  66.675  52.766  1.00  0.00
ATOM   1748  CG  ARG   218      47.281  67.875  53.501  1.00  0.00
ATOM   1749  CD  ARG   218      48.049  67.393  54.740  1.00  0.00
ATOM   1750  NE  ARG   218      48.672  68.443  55.564  1.00  0.00
ATOM   1751  CZ  ARG   218      49.198  68.331  56.748  1.00  0.00
ATOM   1752  NH1 ARG   218      49.782  69.400  57.256  1.00  0.00
ATOM   1753  NH2 ARG   218      49.185  67.262  57.529  1.00  0.00
ATOM   1754  C   ARG   218      44.323  67.399  53.214  1.00  0.00
ATOM   1755  O   ARG   218      44.112  68.078  54.151  1.00  0.00
ATOM   1756  N   LEU   219      43.610  67.655  52.090  1.00  0.00
ATOM   1757  CA  LEU   219      42.625  68.766  52.018  1.00  0.00
ATOM   1758  CB  LEU   219      42.744  69.553  50.632  1.00  0.00
ATOM   1759  CG  LEU   219      44.123  70.177  50.402  1.00  0.00
ATOM   1760  CD1 LEU   219      44.250  71.002  49.105  1.00  0.00
ATOM   1761  CD2 LEU   219      44.548  71.070  51.577  1.00  0.00
ATOM   1762  C   LEU   219      41.253  68.193  52.401  1.00  0.00
ATOM   1763  O   LEU   219      40.436  68.847  52.992  1.00  0.00
ATOM   1764  N   SER   220      40.878  66.926  52.060  1.00  0.00
ATOM   1765  CA  SER   220      39.578  66.295  52.413  1.00  0.00
ATOM   1766  CB  SER   220      39.317  65.057  51.560  1.00  0.00
ATOM   1767  OG  SER   220      39.416  65.398  50.154  1.00  0.00
ATOM   1768  C   SER   220      39.401  66.000  53.936  1.00  0.00
ATOM   1769  O   SER   220      38.327  65.780  54.492  1.00  0.00
ATOM   1770  N   GLN   221      40.522  66.023  54.752  1.00  0.00
ATOM   1771  CA  GLN   221      40.522  65.927  56.166  1.00  0.00
ATOM   1772  CB  GLN   221      41.718  65.205  56.779  1.00  0.00
ATOM   1773  CG  GLN   221      41.882  63.787  56.498  1.00  0.00
ATOM   1774  CD  GLN   221      42.925  63.025  57.428  1.00  0.00
ATOM   1775  OE1 GLN   221      44.098  63.313  57.423  1.00  0.00
ATOM   1776  NE2 GLN   221      42.593  62.014  58.189  1.00  0.00
ATOM   1777  C   GLN   221      40.533  67.328  56.804  1.00  0.00
ATOM   1778  O   GLN   221      40.153  67.382  57.949  1.00  0.00
ATOM   1779  N   ARG   222      40.848  68.358  56.011  1.00  0.00
ATOM   1780  CA  ARG   222      40.898  69.722  56.526  1.00  0.00
ATOM   1781  CB  ARG   222      42.199  70.350  55.978  1.00  0.00
ATOM   1782  CG  ARG   222      42.473  71.826  56.365  1.00  0.00
ATOM   1783  CD  ARG   222      42.945  72.017  57.838  1.00  0.00
ATOM   1784  NE  ARG   222      43.905  71.017  58.339  1.00  0.00
ATOM   1785  CZ  ARG   222      44.999  71.127  59.008  1.00  0.00
ATOM   1786  NH1 ARG   222      45.857  70.148  59.091  1.00  0.00
ATOM   1787  NH2 ARG   222      45.515  72.218  59.489  1.00  0.00
ATOM   1788  C   ARG   222      39.660  70.533  56.169  1.00  0.00
ATOM   1789  O   ARG   222      39.296  71.519  56.852  1.00  0.00
ATOM   1790  N   PHE   223      39.046  70.180  54.985  1.00  0.00
ATOM   1791  CA  PHE   223      37.867  70.759  54.347  1.00  0.00
ATOM   1792  CB  PHE   223      38.301  71.440  53.034  1.00  0.00
ATOM   1793  CG  PHE   223      39.276  72.640  53.146  1.00  0.00
ATOM   1794  CD1 PHE   223      39.187  73.481  54.282  1.00  0.00
ATOM   1795  CE1 PHE   223      40.053  74.573  54.367  1.00  0.00
ATOM   1796  CZ  PHE   223      41.103  74.759  53.450  1.00  0.00
ATOM   1797  CE2 PHE   223      41.337  73.772  52.446  1.00  0.00
ATOM   1798  CD2 PHE   223      40.343  72.792  52.180  1.00  0.00
ATOM   1799  C   PHE   223      36.706  69.676  54.144  1.00  0.00
ATOM   1800  O   PHE   223      36.346  69.428  52.987  1.00  0.00
ATOM   1801  N   PRO   224      36.273  68.979  55.200  1.00  0.00
ATOM   1802  CD  PRO   224      36.688  69.054  56.574  1.00  0.00
ATOM   1803  CG  PRO   224      36.268  67.742  57.245  1.00  0.00
ATOM   1804  CB  PRO   224      35.352  67.028  56.318  1.00  0.00
ATOM   1805  CA  PRO   224      35.418  67.828  55.019  1.00  0.00
ATOM   1806  C   PRO   224      33.938  68.094  54.504  1.00  0.00
ATOM   1807  O   PRO   224      33.218  67.183  54.120  1.00  0.00
ATOM   1808  N   LYS   225      33.504  69.364  54.447  1.00  0.00
ATOM   1809  CA  LYS   225      32.239  69.830  53.875  1.00  0.00
ATOM   1810  CB  LYS   225      31.591  70.746  54.979  1.00  0.00
ATOM   1811  CG  LYS   225      31.113  69.829  56.141  1.00  0.00
ATOM   1812  CD  LYS   225      30.286  70.647  57.104  1.00  0.00
ATOM   1813  CE  LYS   225      31.204  71.618  57.848  1.00  0.00
ATOM   1814  NZ  LYS   225      30.491  72.206  59.008  1.00  0.00
ATOM   1815  C   LYS   225      32.280  70.391  52.438  1.00  0.00
ATOM   1816  O   LYS   225      31.269  70.585  51.836  1.00  0.00
ATOM   1817  N   ALA   226      33.517  70.625  51.924  1.00  0.00
ATOM   1818  CA  ALA   226      33.750  70.999  50.503  1.00  0.00
ATOM   1819  CB  ALA   226      35.182  71.535  50.441  1.00  0.00
ATOM   1820  C   ALA   226      33.473  69.869  49.484  1.00  0.00
ATOM   1821  O   ALA   226      33.731  68.695  49.766  1.00  0.00
ATOM   1822  N   GLU   227      32.908  70.128  48.304  1.00  0.00
ATOM   1823  CA  GLU   227      32.667  69.195  47.156  1.00  0.00
ATOM   1824  CB  GLU   227      31.745  69.829  46.155  1.00  0.00
ATOM   1825  CG  GLU   227      30.299  70.067  46.666  1.00  0.00
ATOM   1826  CD  GLU   227      29.559  68.673  46.693  1.00  0.00
ATOM   1827  OE1 GLU   227      29.341  67.992  45.607  1.00  0.00
ATOM   1828  OE2 GLU   227      29.077  68.291  47.786  1.00  0.00
ATOM   1829  C   GLU   227      33.993  68.810  46.485  1.00  0.00
ATOM   1830  O   GLU   227      34.831  69.671  46.259  1.00  0.00
ATOM   1831  N   PHE   228      34.061  67.569  45.993  1.00  0.00
ATOM   1832  CA  PHE   228      35.336  66.923  45.437  1.00  0.00
ATOM   1833  CB  PHE   228      35.092  65.431  45.106  1.00  0.00
ATOM   1834  CG  PHE   228      36.247  64.810  44.328  1.00  0.00
ATOM   1835  CD1 PHE   228      37.546  64.778  44.919  1.00  0.00
ATOM   1836  CE1 PHE   228      38.594  64.278  44.148  1.00  0.00
ATOM   1837  CZ  PHE   228      38.346  63.754  42.877  1.00  0.00
ATOM   1838  CE2 PHE   228      37.053  63.751  42.347  1.00  0.00
ATOM   1839  CD2 PHE   228      36.005  64.248  43.061  1.00  0.00
ATOM   1840  C   PHE   228      35.855  67.719  44.261  1.00  0.00
ATOM   1841  O   PHE   228      37.053  67.932  44.278  1.00  0.00
ATOM   1842  N   ALA   229      35.005  68.155  43.300  1.00  0.00
ATOM   1843  CA  ALA   229      35.535  68.984  42.215  1.00  0.00
ATOM   1844  CB  ALA   229      34.513  69.242  41.205  1.00  0.00
ATOM   1845  C   ALA   229      36.119  70.324  42.722  1.00  0.00
ATOM   1846  O   ALA   229      37.187  70.768  42.174  1.00  0.00
ATOM   1847  N   GLU   230      35.491  70.928  43.744  1.00  0.00
ATOM   1848  CA  GLU   230      35.977  72.258  44.221  1.00  0.00
ATOM   1849  CB  GLU   230      34.763  72.944  44.789  1.00  0.00
ATOM   1850  CG  GLU   230      34.919  74.463  44.942  1.00  0.00
ATOM   1851  CD  GLU   230      33.662  75.292  45.252  1.00  0.00
ATOM   1852  OE1 GLU   230      33.369  76.277  44.497  1.00  0.00
ATOM   1853  OE2 GLU   230      32.996  74.918  46.261  1.00  0.00
ATOM   1854  C   GLU   230      37.221  72.154  45.174  1.00  0.00
ATOM   1855  O   GLU   230      38.171  72.913  44.953  1.00  0.00
ATOM   1856  N   VAL   231      37.305  71.090  45.972  1.00  0.00
ATOM   1857  CA  VAL   231      38.567  70.603  46.586  1.00  0.00
ATOM   1858  CB  VAL   231      38.274  69.359  47.464  1.00  0.00
ATOM   1859  CG1 VAL   231      39.485  68.651  48.043  1.00  0.00
ATOM   1860  CG2 VAL   231      37.438  69.629  48.675  1.00  0.00
ATOM   1861  C   VAL   231      39.699  70.338  45.585  1.00  0.00
ATOM   1862  O   VAL   231      40.802  70.936  45.656  1.00  0.00
ATOM   1863  N   SER   232      39.366  69.722  44.480  1.00  0.00
ATOM   1864  CA  SER   232      40.244  69.518  43.262  1.00  0.00
ATOM   1865  CB  SER   232      39.685  68.528  42.243  1.00  0.00
ATOM   1866  OG  SER   232      39.463  67.281  42.836  1.00  0.00
ATOM   1867  C   SER   232      40.837  70.796  42.647  1.00  0.00
ATOM   1868  O   SER   232      41.921  70.814  42.140  1.00  0.00
ATOM   1869  N   LYS   233      40.162  71.965  42.748  1.00  0.00
ATOM   1870  CA  LYS   233      40.755  73.257  42.357  1.00  0.00
ATOM   1871  CB  LYS   233      39.579  74.340  42.338  1.00  0.00
ATOM   1872  CG  LYS   233      39.851  75.552  41.421  1.00  0.00
ATOM   1873  CD  LYS   233      40.974  76.443  41.916  1.00  0.00
ATOM   1874  CE  LYS   233      40.891  77.702  41.073  1.00  0.00
ATOM   1875  NZ  LYS   233      41.849  78.719  41.546  1.00  0.00
ATOM   1876  C   LYS   233      41.925  73.513  43.300  1.00  0.00
ATOM   1877  O   LYS   233      43.035  73.699  42.876  1.00  0.00
ATOM   1878  N   LEU   234      41.694  73.408  44.617  1.00  0.00
ATOM   1879  CA  LEU   234      42.744  73.548  45.626  1.00  0.00
ATOM   1880  CB  LEU   234      42.157  73.546  47.063  1.00  0.00
ATOM   1881  CG  LEU   234      40.901  74.360  47.305  1.00  0.00
ATOM   1882  CD1 LEU   234      40.323  74.292  48.727  1.00  0.00
ATOM   1883  CD2 LEU   234      41.091  75.851  47.008  1.00  0.00
ATOM   1884  C   LEU   234      43.844  72.499  45.580  1.00  0.00
ATOM   1885  O   LEU   234      45.042  72.804  45.830  1.00  0.00
ATOM   1886  N   VAL   235      43.524  71.264  45.198  1.00  0.00
ATOM   1887  CA  VAL   235      44.506  70.122  45.041  1.00  0.00
ATOM   1888  CB  VAL   235      43.825  68.775  44.828  1.00  0.00
ATOM   1889  CG1 VAL   235      44.824  67.718  44.386  1.00  0.00
ATOM   1890  CG2 VAL   235      43.331  68.239  46.242  1.00  0.00
ATOM   1891  C   VAL   235      45.461  70.464  43.961  1.00  0.00
ATOM   1892  O   VAL   235      46.698  70.344  44.172  1.00  0.00
ATOM   1893  N   THR   236      44.968  70.851  42.769  1.00  0.00
ATOM   1894  CA  THR   236      45.823  71.260  41.641  1.00  0.00
ATOM   1895  CB  THR   236      45.154  71.571  40.290  1.00  0.00
ATOM   1896  CG2 THR   236      44.686  70.346  39.428  1.00  0.00
ATOM   1897  OG1 THR   236      44.047  72.415  40.486  1.00  0.00
ATOM   1898  C   THR   236      46.710  72.464  42.062  1.00  0.00
ATOM   1899  O   THR   236      47.867  72.485  41.669  1.00  0.00
ATOM   1900  N   ASP   237      46.109  73.453  42.675  1.00  0.00
ATOM   1901  CA  ASP   237      46.773  74.723  43.026  1.00  0.00
ATOM   1902  CB  ASP   237      45.743  75.827  43.265  1.00  0.00
ATOM   1903  CG  ASP   237      44.985  76.374  42.008  1.00  0.00
ATOM   1904  OD1 ASP   237      44.084  77.274  42.158  1.00  0.00
ATOM   1905  OD2 ASP   237      45.112  75.871  40.847  1.00  0.00
ATOM   1906  C   ASP   237      47.912  74.600  44.089  1.00  0.00
ATOM   1907  O   ASP   237      49.014  75.120  43.932  1.00  0.00
ATOM   1908  N   LEU   238      47.645  73.804  45.134  1.00  0.00
ATOM   1909  CA  LEU   238      48.706  73.434  46.047  1.00  0.00
ATOM   1910  CB  LEU   238      48.058  72.578  47.159  1.00  0.00
ATOM   1911  CG  LEU   238      48.950  72.227  48.314  1.00  0.00
ATOM   1912  CD1 LEU   238      49.449  73.375  49.194  1.00  0.00
ATOM   1913  CD2 LEU   238      48.078  71.321  49.263  1.00  0.00
ATOM   1914  C   LEU   238      49.793  72.569  45.374  1.00  0.00
ATOM   1915  O   LEU   238      50.961  72.745  45.652  1.00  0.00
ATOM   1916  N   THR   239      49.471  71.740  44.393  1.00  0.00
ATOM   1917  CA  THR   239      50.574  70.987  43.677  1.00  0.00
ATOM   1918  CB  THR   239      50.039  69.806  42.864  1.00  0.00
ATOM   1919  CG2 THR   239      51.118  68.852  42.277  1.00  0.00
ATOM   1920  OG1 THR   239      49.123  69.126  43.645  1.00  0.00
ATOM   1921  C   THR   239      51.472  71.894  42.769  1.00  0.00
ATOM   1922  O   THR   239      52.717  71.606  42.805  1.00  0.00
ATOM   1923  N   LYS   240      50.958  72.952  42.155  1.00  0.00
ATOM   1924  CA  LYS   240      51.629  74.055  41.491  1.00  0.00
ATOM   1925  CB  LYS   240      50.696  75.090  40.788  1.00  0.00
ATOM   1926  CG  LYS   240      51.249  75.733  39.561  1.00  0.00
ATOM   1927  CD  LYS   240      52.129  76.964  39.889  1.00  0.00
ATOM   1928  CE  LYS   240      52.137  78.052  38.813  1.00  0.00
ATOM   1929  NZ  LYS   240      53.188  79.056  39.102  1.00  0.00
ATOM   1930  C   LYS   240      52.528  74.838  42.485  1.00  0.00
ATOM   1931  O   LYS   240      53.738  74.951  42.168  1.00  0.00
ATOM   1932  N   VAL   241      51.978  75.255  43.666  1.00  0.00
ATOM   1933  CA  VAL   241      52.853  75.767  44.807  1.00  0.00
ATOM   1934  CB  VAL   241      51.864  76.010  45.949  1.00  0.00
ATOM   1935  CG1 VAL   241      52.701  76.441  47.216  1.00  0.00
ATOM   1936  CG2 VAL   241      50.998  77.283  45.553  1.00  0.00
ATOM   1937  C   VAL   241      53.990  74.867  45.090  1.00  0.00
ATOM   1938  O   VAL   241      55.084  75.455  45.112  1.00  0.00
ATOM   1939  N   HIE   242      53.841  73.602  45.382  1.00  0.00
ATOM   1940  CA  HIE   242      54.995  72.849  45.961  1.00  0.00
ATOM   1941  CB  HIE   242      54.522  71.613  46.782  1.00  0.00
ATOM   1942  CG  HIE   242      53.880  71.862  48.146  1.00  0.00
ATOM   1943  ND1 HIE   242      54.553  71.826  49.398  1.00  0.00
ATOM   1944  CE1 HIE   242      53.777  72.626  50.258  1.00  0.00
ATOM   1945  NE2 HIE   242      52.725  73.055  49.580  1.00  0.00
ATOM   1946  CD2 HIE   242      52.809  72.677  48.272  1.00  0.00
ATOM   1947  C   HIE   242      56.024  72.528  44.770  1.00  0.00
ATOM   1948  O   HIE   242      57.201  72.430  44.979  1.00  0.00
ATOM   1949  N   THR   243      55.509  72.574  43.468  1.00  0.00
ATOM   1950  CA  THR   243      56.276  72.438  42.199  1.00  0.00
ATOM   1951  CB  THR   243      55.325  72.281  41.047  1.00  0.00
ATOM   1952  CG2 THR   243      55.790  72.470  39.598  1.00  0.00
ATOM   1953  OG1 THR   243      54.843  71.021  41.122  1.00  0.00
ATOM   1954  C   THR   243      57.191  73.664  41.981  1.00  0.00
ATOM   1955  O   THR   243      58.358  73.596  41.534  1.00  0.00
ATOM   1956  N   GLU   244      56.667  74.858  42.272  1.00  0.00
ATOM   1957  CA  GLU   244      57.552  76.050  42.356  1.00  0.00
ATOM   1958  CB  GLU   244      56.751  77.304  42.710  1.00  0.00
ATOM   1959  CG  GLU   244      55.814  77.901  41.688  1.00  0.00
ATOM   1960  CD  GLU   244      56.365  77.922  40.281  1.00  0.00
ATOM   1961  OE1 GLU   244      57.571  78.281  40.040  1.00  0.00
ATOM   1962  OE2 GLU   244      55.616  77.839  39.308  1.00  0.00
ATOM   1963  C   GLU   244      58.688  75.836  43.381  1.00  0.00
ATOM   1964  O   GLU   244      59.825  76.095  43.048  1.00  0.00
ATOM   1965  N   CYX   245      58.369  75.362  44.589  1.00  0.00
ATOM   1966  CA  CYX   245      59.455  75.061  45.555  1.00  0.00
ATOM   1967  CB  CYX   245      58.816  74.871  46.864  1.00  0.00
ATOM   1968  SG  CYX   245      58.646  76.328  47.813  1.00  0.00
ATOM   1969  C   CYX   245      60.421  73.904  45.124  1.00  0.00
ATOM   1970  O   CYX   245      61.537  73.835  45.655  1.00  0.00
ATOM   1971  N   CYX   246      59.991  72.996  44.218  1.00  0.00
ATOM   1972  CA  CYX   246      60.668  71.738  43.862  1.00  0.00
ATOM   1973  CB  CYX   246      59.581  70.691  43.449  1.00  0.00
ATOM   1974  SG  CYX   246      58.777  69.859  44.863  1.00  0.00
ATOM   1975  C   CYX   246      61.706  71.912  42.730  1.00  0.00
ATOM   1976  O   CYX   246      62.855  71.435  42.859  1.00  0.00
ATOM   1977  N   HIE   247      61.308  72.501  41.566  1.00  0.00
ATOM   1978  CA  HIE   247      62.198  72.707  40.391  1.00  0.00
ATOM   1979  CB  HIE   247      61.942  71.487  39.467  1.00  0.00
ATOM   1980  CG  HIE   247      60.518  71.251  39.138  1.00  0.00
ATOM   1981  ND1 HIE   247      59.597  70.326  39.703  1.00  0.00
ATOM   1982  CE1 HIE   247      58.556  70.328  38.912  1.00  0.00
ATOM   1983  NE2 HIE   247      58.703  71.168  37.871  1.00  0.00
ATOM   1984  CD2 HIE   247      59.992  71.722  38.005  1.00  0.00
ATOM   1985  C   HIE   247      61.944  74.032  39.660  1.00  0.00
ATOM   1986  O   HIE   247      62.602  74.193  38.557  1.00  0.00
ATOM   1987  N   GLY   248      61.027  74.870  40.177  1.00  0.00
ATOM   1988  CA  GLY   248      60.830  76.200  39.740  1.00  0.00
ATOM   1989  C   GLY   248      61.452  77.236  40.666  1.00  0.00
ATOM   1990  O   GLY   248      62.659  77.165  40.795  1.00  0.00
ATOM   1991  N   ASP   249      60.689  78.237  41.222  1.00  0.00
ATOM   1992  CA  ASP   249      61.193  79.341  42.033  1.00  0.00
ATOM   1993  CB  ASP   249      61.105  80.643  41.325  1.00  0.00
ATOM   1994  CG  ASP   249      61.678  80.478  39.936  1.00  0.00
ATOM   1995  OD1 ASP   249      60.884  80.135  39.010  1.00  0.00
ATOM   1996  OD2 ASP   249      62.918  80.702  39.826  1.00  0.00
ATOM   1997  C   ASP   249      60.638  79.448  43.472  1.00  0.00
ATOM   1998  O   ASP   249      59.413  79.132  43.746  1.00  0.00
ATOM   1999  N   LEU   250      61.461  79.861  44.398  1.00  0.00
ATOM   2000  CA  LEU   250      61.079  80.026  45.776  1.00  0.00
ATOM   2001  CB  LEU   250      62.338  80.113  46.561  1.00  0.00
ATOM   2002  CG  LEU   250      63.201  78.795  46.614  1.00  0.00
ATOM   2003  CD1 LEU   250      64.434  79.194  47.512  1.00  0.00
ATOM   2004  CD2 LEU   250      62.517  77.530  47.161  1.00  0.00
ATOM   2005  C   LEU   250      60.283  81.242  45.946  1.00  0.00
ATOM   2006  O   LEU   250      59.465  81.214  46.826  1.00  0.00
ATOM   2007  N   LEU   251      60.512  82.321  45.232  1.00  0.00
ATOM   2008  CA  LEU   251      59.665  83.495  45.196  1.00  0.00
ATOM   2009  CB  LEU   251      60.424  84.441  44.202  1.00  0.00
ATOM   2010  CG  LEU   251      61.740  85.031  44.762  1.00  0.00
ATOM   2011  CD1 LEU   251      62.477  85.879  43.631  1.00  0.00
ATOM   2012  CD2 LEU   251      61.701  85.948  46.037  1.00  0.00
ATOM   2013  C   LEU   251      58.197  83.284  44.757  1.00  0.00
ATOM   2014  O   LEU   251      57.263  83.695  45.486  1.00  0.00
ATOM   2015  N   GLU   252      58.016  82.508  43.641  1.00  0.00
ATOM   2016  CA  GLU   252      56.685  82.293  43.066  1.00  0.00
ATOM   2017  CB  GLU   252      56.928  81.784  41.653  1.00  0.00
ATOM   2018  CG  GLU   252      57.607  82.710  40.722  1.00  0.00
ATOM   2019  CD  GLU   252      57.278  82.467  39.209  1.00  0.00
ATOM   2020  OE1 GLU   252      56.334  83.098  38.704  1.00  0.00
ATOM   2021  OE2 GLU   252      57.967  81.733  38.537  1.00  0.00
ATOM   2022  C   GLU   252      56.008  81.247  43.971  1.00  0.00
ATOM   2023  O   GLU   252      54.781  81.366  44.175  1.00  0.00
ATOM   2024  N   CYX   253      56.745  80.342  44.634  1.00  0.00
ATOM   2025  CA  CYX   253      56.171  79.466  45.678  1.00  0.00
ATOM   2026  CB  CYX   253      57.320  78.559  46.130  1.00  0.00
ATOM   2027  SG  CYX   253      56.882  77.323  47.310  1.00  0.00
ATOM   2028  C   CYX   253      55.444  80.171  46.801  1.00  0.00
ATOM   2029  O   CYX   253      54.378  79.760  47.254  1.00  0.00
ATOM   2030  N   ALA   254      55.954  81.275  47.230  1.00  0.00
ATOM   2031  CA  ALA   254      55.339  82.149  48.260  1.00  0.00
ATOM   2032  CB  ALA   254      56.360  83.057  48.912  1.00  0.00
ATOM   2033  C   ALA   254      54.139  82.954  47.577  1.00  0.00
ATOM   2034  O   ALA   254      53.051  83.040  48.101  1.00  0.00
ATOM   2035  N   ASP   255      54.333  83.558  46.427  1.00  0.00
ATOM   2036  CA  ASP   255      53.347  84.460  45.826  1.00  0.00
ATOM   2037  CB  ASP   255      54.081  85.594  45.074  1.00  0.00
ATOM   2038  CG  ASP   255      53.019  86.665  44.659  1.00  0.00
ATOM   2039  OD1 ASP   255      52.471  87.236  45.560  1.00  0.00
ATOM   2040  OD2 ASP   255      52.770  86.886  43.455  1.00  0.00
ATOM   2041  C   ASP   255      52.223  83.668  45.054  1.00  0.00
ATOM   2042  O   ASP   255      51.225  84.281  44.801  1.00  0.00
ATOM   2043  N   ASP   256      52.336  82.365  44.973  1.00  0.00
ATOM   2044  CA  ASP   256      51.330  81.385  44.564  1.00  0.00
ATOM   2045  CB  ASP   256      51.867  80.396  43.519  1.00  0.00
ATOM   2046  CG  ASP   256      52.343  81.040  42.281  1.00  0.00
ATOM   2047  OD1 ASP   256      52.967  80.423  41.365  1.00  0.00
ATOM   2048  OD2 ASP   256      51.981  82.218  42.006  1.00  0.00
ATOM   2049  C   ASP   256      50.721  80.673  45.707  1.00  0.00
ATOM   2050  O   ASP   256      49.457  80.416  45.672  1.00  0.00
ATOM   2051  N   ARG   257      51.327  80.442  46.903  1.00  0.00
ATOM   2052  CA  ARG   257      50.509  80.210  48.179  1.00  0.00
ATOM   2053  CB  ARG   257      51.423  79.957  49.359  1.00  0.00
ATOM   2054  CG  ARG   257      50.783  79.447  50.645  1.00  0.00
ATOM   2055  CD  ARG   257      51.676  79.490  51.864  1.00  0.00
ATOM   2056  NE  ARG   257      52.002  80.814  52.330  1.00  0.00
ATOM   2057  CZ  ARG   257      52.677  81.022  53.434  1.00  0.00
ATOM   2058  NH1 ARG   257      53.379  82.101  53.695  1.00  0.00
ATOM   2059  NH2 ARG   257      52.858  80.027  54.306  1.00  0.00
ATOM   2060  C   ARG   257      49.694  81.528  48.429  1.00  0.00
ATOM   2061  O   ARG   257      48.648  81.443  49.032  1.00  0.00
ATOM   2062  N   ALA   258      50.174  82.714  48.093  1.00  0.00
ATOM   2063  CA  ALA   258      49.424  84.038  48.231  1.00  0.00
ATOM   2064  CB  ALA   258      50.464  85.135  48.178  1.00  0.00
ATOM   2065  C   ALA   258      48.342  84.125  47.288  1.00  0.00
ATOM   2066  O   ALA   258      47.260  84.488  47.661  1.00  0.00
ATOM   2067  N   ASP   259      48.576  83.800  45.973  1.00  0.00
ATOM   2068  CA  ASP   259      47.418  83.628  45.048  1.00  0.00
ATOM   2069  CB  ASP   259      47.958  83.360  43.679  1.00  0.00
ATOM   2070  CG  ASP   259      46.832  82.887  42.641  1.00  0.00
ATOM   2071  OD1 ASP   259      46.624  81.666  42.445  1.00  0.00
ATOM   2072  OD2 ASP   259      46.116  83.770  42.083  1.00  0.00
ATOM   2073  C   ASP   259      46.345  82.535  45.423  1.00  0.00
ATOM   2074  O   ASP   259      45.166  82.794  45.295  1.00  0.00
ATOM   2075  N   LEU   260      46.749  81.329  45.958  1.00  0.00
ATOM   2076  CA  LEU   260      45.712  80.326  46.382  1.00  0.00
ATOM   2077  CB  LEU   260      46.442  78.979  46.644  1.00  0.00
ATOM   2078  CG  LEU   260      45.414  77.928  47.180  1.00  0.00
ATOM   2079  CD1 LEU   260      44.197  77.815  46.231  1.00  0.00
ATOM   2080  CD2 LEU   260      46.008  76.544  47.174  1.00  0.00
ATOM   2081  C   LEU   260      44.986  80.911  47.601  1.00  0.00
ATOM   2082  O   LEU   260      43.704  80.761  47.691  1.00  0.00
ATOM   2083  N   ALA   261      45.622  81.702  48.451  1.00  0.00
ATOM   2084  CA  ALA   261      44.991  82.299  49.546  1.00  0.00
ATOM   2085  CB  ALA   261      46.151  82.668  50.526  1.00  0.00
ATOM   2086  C   ALA   261      44.061  83.486  49.291  1.00  0.00
ATOM   2087  O   ALA   261      42.969  83.607  49.910  1.00  0.00
ATOM   2088  N   LYS   262      44.225  84.225  48.231  1.00  0.00
ATOM   2089  CA  LYS   262      43.302  85.248  47.742  1.00  0.00
ATOM   2090  CB  LYS   262      44.011  85.997  46.532  1.00  0.00
ATOM   2091  CG  LYS   262      45.021  87.047  46.993  1.00  0.00
ATOM   2092  CD  LYS   262      45.685  87.741  45.749  1.00  0.00
ATOM   2093  CE  LYS   262      46.891  88.573  46.167  1.00  0.00
ATOM   2094  NZ  LYS   262      47.552  89.109  44.913  1.00  0.00
ATOM   2095  C   LYS   262      42.105  84.473  47.172  1.00  0.00
ATOM   2096  O   LYS   262      40.944  84.832  47.430  1.00  0.00
ATOM   2097  N   TYR   263      42.308  83.349  46.500  1.00  0.00
ATOM   2098  CA  TYR   263      41.285  82.509  45.880  1.00  0.00
ATOM   2099  CB  TYR   263      41.855  81.461  44.943  1.00  0.00
ATOM   2100  CG  TYR   263      40.714  80.611  44.322  1.00  0.00
ATOM   2101  CD1 TYR   263      40.553  79.245  44.610  1.00  0.00
ATOM   2102  CE1 TYR   263      39.390  78.628  44.112  1.00  0.00
ATOM   2103  CZ  TYR   263      38.545  79.200  43.136  1.00  0.00
ATOM   2104  OH  TYR   263      37.487  78.510  42.636  1.00  0.00
ATOM   2105  CE2 TYR   263      38.885  80.471  42.653  1.00  0.00
ATOM   2106  CD2 TYR   263      39.876  81.203  43.335  1.00  0.00
ATOM   2107  C   TYR   263      40.411  81.754  46.865  1.00  0.00
ATOM   2108  O   TYR   263      39.213  81.839  46.824  1.00  0.00
ATOM   2109  N   ILE   264      41.033  81.422  47.973  1.00  0.00
ATOM   2110  CA  ILE   264      40.291  80.770  49.078  1.00  0.00
ATOM   2111  CB  ILE   264      41.206  79.982  50.071  1.00  0.00
ATOM   2112  CG2 ILE   264      40.593  79.671  51.396  1.00  0.00
ATOM   2113  CG1 ILE   264      41.777  78.760  49.418  1.00  0.00
ATOM   2114  CD1 ILE   264      42.858  78.072  50.257  1.00  0.00
ATOM   2115  C   ILE   264      39.423  81.830  49.737  1.00  0.00
ATOM   2116  O   ILE   264      38.243  81.558  50.076  1.00  0.00
ATOM   2117  N   CYX   265      39.943  83.018  49.988  1.00  0.00
ATOM   2118  CA  CYX   265      39.167  84.122  50.540  1.00  0.00
ATOM   2119  CB  CYX   265      40.093  85.110  51.162  1.00  0.00
ATOM   2120  SG  CYX   265      41.106  84.377  52.487  1.00  0.00
ATOM   2121  C   CYX   265      38.079  84.715  49.612  1.00  0.00
ATOM   2122  O   CYX   265      37.292  85.495  50.107  1.00  0.00
ATOM   2123  N   GLU   266      38.028  84.390  48.297  1.00  0.00
ATOM   2124  CA  GLU   266      36.928  84.671  47.430  1.00  0.00
ATOM   2125  CB  GLU   266      37.522  84.870  45.995  1.00  0.00
ATOM   2126  CG  GLU   266      36.705  85.698  45.022  1.00  0.00
ATOM   2127  CD  GLU   266      37.636  86.264  43.903  1.00  0.00
ATOM   2128  OE1 GLU   266      38.407  87.174  44.236  1.00  0.00
ATOM   2129  OE2 GLU   266      37.548  85.845  42.682  1.00  0.00
ATOM   2130  C   GLU   266      35.916  83.551  47.351  1.00  0.00
ATOM   2131  O   GLU   266      34.906  83.667  46.613  1.00  0.00
ATOM   2132  N   ASN   267      36.081  82.497  48.081  1.00  0.00
ATOM   2133  CA  ASN   267      35.266  81.282  48.075  1.00  0.00
ATOM   2134  CB  ASN   267      36.033  80.178  47.214  1.00  0.00
ATOM   2135  CG  ASN   267      35.962  80.518  45.711  1.00  0.00
ATOM   2136  OD1 ASN   267      35.034  80.290  44.987  1.00  0.00
ATOM   2137  ND2 ASN   267      36.982  81.167  45.200  1.00  0.00
ATOM   2138  C   ASN   267      34.968  80.696  49.478  1.00  0.00
ATOM   2139  O   ASN   267      34.681  79.543  49.748  1.00  0.00
ATOM   2140  N   GLN   268      34.985  81.594  50.512  1.00  0.00
ATOM   2141  CA  GLN   268      34.818  81.320  51.953  1.00  0.00
ATOM   2142  CB  GLN   268      34.774  82.643  52.741  1.00  0.00
ATOM   2143  CG  GLN   268      36.114  83.420  52.688  1.00  0.00
ATOM   2144  CD  GLN   268      36.200  84.642  53.616  1.00  0.00
ATOM   2145  OE1 GLN   268      35.984  84.541  54.836  1.00  0.00
ATOM   2146  NE2 GLN   268      36.569  85.819  53.201  1.00  0.00
ATOM   2147  C   GLN   268      33.543  80.495  52.159  1.00  0.00
ATOM   2148  O   GLN   268      33.476  79.680  53.073  1.00  0.00
ATOM   2149  N   ASP   269      32.509  80.718  51.293  1.00  0.00
ATOM   2150  CA  ASP   269      31.118  80.182  51.496  1.00  0.00
ATOM   2151  CB  ASP   269      30.125  80.967  50.676  1.00  0.00
ATOM   2152  CG  ASP   269      30.343  82.439  50.898  1.00  0.00
ATOM   2153  OD1 ASP   269      29.850  82.918  51.923  1.00  0.00
ATOM   2154  OD2 ASP   269      31.200  83.025  50.134  1.00  0.00
ATOM   2155  C   ASP   269      30.964  78.606  51.246  1.00  0.00
ATOM   2156  O   ASP   269      30.094  77.975  51.847  1.00  0.00
ATOM   2157  N   SER   270      31.884  78.000  50.469  1.00  0.00
ATOM   2158  CA  SER   270      31.824  76.592  50.012  1.00  0.00
ATOM   2159  CB  SER   270      31.551  76.650  48.532  1.00  0.00
ATOM   2160  OG  SER   270      32.768  77.151  48.000  1.00  0.00
ATOM   2161  C   SER   270      32.960  75.663  50.340  1.00  0.00
ATOM   2162  O   SER   270      32.930  74.451  50.089  1.00  0.00
ATOM   2163  N   ILE   271      33.975  76.237  50.957  1.00  0.00
ATOM   2164  CA  ILE   271      35.211  75.572  51.345  1.00  0.00
ATOM   2165  CB  ILE   271      36.493  76.426  50.892  1.00  0.00
ATOM   2166  CG2 ILE   271      37.791  75.634  51.241  1.00  0.00
ATOM   2167  CG1 ILE   271      36.453  76.709  49.363  1.00  0.00
ATOM   2168  CD1 ILE   271      36.074  75.594  48.382  1.00  0.00
ATOM   2169  C   ILE   271      35.239  75.394  52.846  1.00  0.00
ATOM   2170  O   ILE   271      35.496  74.293  53.347  1.00  0.00
ATOM   2171  N   SER   272      34.934  76.382  53.652  1.00  0.00
ATOM   2172  CA  SER   272      35.003  76.113  55.124  1.00  0.00
ATOM   2173  CB  SER   272      36.429  75.828  55.720  1.00  0.00
ATOM   2174  OG  SER   272      36.467  75.844  57.122  1.00  0.00
ATOM   2175  C   SER   272      34.559  77.304  55.934  1.00  0.00
ATOM   2176  O   SER   272      35.086  78.314  55.618  1.00  0.00
ATOM   2177  N   SER   273      33.719  77.090  56.920  1.00  0.00
ATOM   2178  CA  SER   273      33.354  78.009  58.031  1.00  0.00
ATOM   2179  CB  SER   273      32.658  77.172  59.125  1.00  0.00
ATOM   2180  OG  SER   273      31.677  76.364  58.547  1.00  0.00
ATOM   2181  C   SER   273      34.524  78.696  58.747  1.00  0.00
ATOM   2182  O   SER   273      34.393  79.853  59.235  1.00  0.00
ATOM   2183  N   LYS   274      35.692  78.044  58.815  1.00  0.00
ATOM   2184  CA  LYS   274      36.814  78.453  59.661  1.00  0.00
ATOM   2185  CB  LYS   274      37.404  77.236  60.423  1.00  0.00
ATOM   2186  CG  LYS   274      36.217  76.536  61.171  1.00  0.00
ATOM   2187  CD  LYS   274      36.820  75.337  61.859  1.00  0.00
ATOM   2188  CE  LYS   274      35.866  74.855  62.967  1.00  0.00
ATOM   2189  NZ  LYS   274      36.204  73.567  63.596  1.00  0.00
ATOM   2190  C   LYS   274      37.944  79.289  58.981  1.00  0.00
ATOM   2191  O   LYS   274      38.899  79.718  59.745  1.00  0.00
ATOM   2192  N   LEU   275      37.761  79.611  57.743  1.00  0.00
ATOM   2193  CA  LEU   275      38.591  80.518  56.978  1.00  0.00
ATOM   2194  CB  LEU   275      38.268  80.273  55.509  1.00  0.00
ATOM   2195  CG  LEU   275      38.788  78.923  54.939  1.00  0.00
ATOM   2196  CD1 LEU   275      38.252  78.834  53.504  1.00  0.00
ATOM   2197  CD2 LEU   275      40.315  78.986  54.929  1.00  0.00
ATOM   2198  C   LEU   275      38.480  82.014  57.367  1.00  0.00
ATOM   2199  O   LEU   275      39.422  82.821  57.184  1.00  0.00
ATOM   2200  N   LYS   276      37.277  82.320  57.919  1.00  0.00
ATOM   2201  CA  LYS   276      36.845  83.762  58.104  1.00  0.00
ATOM   2202  CB  LYS   276      35.412  83.995  58.699  1.00  0.00
ATOM   2203  CG  LYS   276      34.219  83.318  57.958  1.00  0.00
ATOM   2204  CD  LYS   276      32.836  84.020  58.137  1.00  0.00
ATOM   2205  CE  LYS   276      31.903  83.614  57.015  1.00  0.00
ATOM   2206  NZ  LYS   276      30.656  84.397  57.011  1.00  0.00
ATOM   2207  C   LYS   276      37.883  84.492  59.002  1.00  0.00
ATOM   2208  O   LYS   276      38.339  85.611  58.657  1.00  0.00
ATOM   2209  N   GLU   277      38.232  83.942  60.209  1.00  0.00
ATOM   2210  CA  GLU   277      39.354  84.494  60.894  1.00  0.00
ATOM   2211  CB  GLU   277      39.550  83.635  62.222  1.00  0.00
ATOM   2212  CG  GLU   277      39.836  82.129  61.950  1.00  0.00
ATOM   2213  CD  GLU   277      39.592  81.235  63.213  1.00  0.00
ATOM   2214  OE1 GLU   277      40.536  80.503  63.540  1.00  0.00
ATOM   2215  OE2 GLU   277      38.554  81.347  63.909  1.00  0.00
ATOM   2216  C   GLU   277      40.792  84.600  60.186  1.00  0.00
ATOM   2217  O   GLU   277      41.615  85.467  60.456  1.00  0.00
ATOM   2218  N   CYX   278      41.062  83.709  59.245  1.00  0.00
ATOM   2219  CA  CYX   278      42.277  83.768  58.439  1.00  0.00
ATOM   2220  CB  CYX   278      42.553  82.346  57.778  1.00  0.00
ATOM   2221  SG  CYX   278      42.858  81.078  58.976  1.00  0.00
ATOM   2222  C   CYX   278      42.207  84.844  57.371  1.00  0.00
ATOM   2223  O   CYX   278      43.207  85.510  57.129  1.00  0.00
ATOM   2224  N   CYX   279      41.086  84.962  56.638  1.00  0.00
ATOM   2225  CA  CYX   279      40.916  85.990  55.636  1.00  0.00
ATOM   2226  CB  CYX   279      39.653  85.536  54.793  1.00  0.00
ATOM   2227  SG  CYX   279      39.674  84.007  53.892  1.00  0.00
ATOM   2228  C   CYX   279      40.732  87.465  56.079  1.00  0.00
ATOM   2229  O   CYX   279      40.780  88.272  55.192  1.00  0.00
ATOM   2230  N   GLU   280      40.477  87.799  57.369  1.00  0.00
ATOM   2231  CA  GLU   280      40.452  89.140  57.902  1.00  0.00
ATOM   2232  CB  GLU   280      39.268  89.287  58.958  1.00  0.00
ATOM   2233  CG  GLU   280      39.636  88.542  60.174  1.00  0.00
ATOM   2234  CD  GLU   280      38.622  88.661  61.335  1.00  0.00
ATOM   2235  OE1 GLU   280      37.758  87.814  61.616  1.00  0.00
ATOM   2236  OE2 GLU   280      38.783  89.712  62.018  1.00  0.00
ATOM   2237  C   GLU   280      41.888  89.503  58.428  1.00  0.00
ATOM   2238  O   GLU   280      42.037  90.363  59.328  1.00  0.00
ATOM   2239  N   LYS   281      42.994  89.017  57.841  1.00  0.00
ATOM   2240  CA  LYS   281      44.443  89.244  58.209  1.00  0.00
ATOM   2241  CB  LYS   281      45.092  87.903  58.656  1.00  0.00
ATOM   2242  CG  LYS   281      44.415  87.118  59.746  1.00  0.00
ATOM   2243  CD  LYS   281      45.149  85.828  60.210  1.00  0.00
ATOM   2244  CE  LYS   281      44.731  85.175  61.543  1.00  0.00
ATOM   2245  NZ  LYS   281      44.964  86.179  62.638  1.00  0.00
ATOM   2246  C   LYS   281      45.244  89.994  57.072  1.00  0.00
ATOM   2247  O   LYS   281      44.721  89.973  55.923  1.00  0.00
ATOM   2248  N   PRO   282      46.460  90.494  57.274  1.00  0.00
ATOM   2249  CD  PRO   282      47.142  90.631  58.597  1.00  0.00
ATOM   2250  CG  PRO   282      48.575  90.801  58.178  1.00  0.00
ATOM   2251  CB  PRO   282      48.649  91.438  56.783  1.00  0.00
ATOM   2252  CA  PRO   282      47.420  90.770  56.175  1.00  0.00
ATOM   2253  C   PRO   282      47.881  89.544  55.379  1.00  0.00
ATOM   2254  O   PRO   282      48.027  88.470  55.900  1.00  0.00
ATOM   2255  N   LEU   283      48.183  89.782  54.067  1.00  0.00
ATOM   2256  CA  LEU   283      48.371  88.756  53.039  1.00  0.00
ATOM   2257  CB  LEU   283      48.746  89.473  51.698  1.00  0.00
ATOM   2258  CG  LEU   283      48.997  88.473  50.516  1.00  0.00
ATOM   2259  CD1 LEU   283      47.783  87.699  50.042  1.00  0.00
ATOM   2260  CD2 LEU   283      49.302  89.445  49.403  1.00  0.00
ATOM   2261  C   LEU   283      49.377  87.625  53.414  1.00  0.00
ATOM   2262  O   LEU   283      49.071  86.427  53.198  1.00  0.00
ATOM   2263  N   LEU   284      50.554  87.807  54.001  1.00  0.00
ATOM   2264  CA  LEU   284      51.507  86.791  54.227  1.00  0.00
ATOM   2265  CB  LEU   284      52.877  87.426  54.367  1.00  0.00
ATOM   2266  CG  LEU   284      54.067  86.576  54.816  1.00  0.00
ATOM   2267  CD1 LEU   284      54.453  85.507  53.808  1.00  0.00
ATOM   2268  CD2 LEU   284      55.283  87.521  54.985  1.00  0.00
ATOM   2269  C   LEU   284      51.071  86.054  55.483  1.00  0.00
ATOM   2270  O   LEU   284      51.455  84.858  55.621  1.00  0.00
ATOM   2271  N   GLU   285      50.334  86.702  56.390  1.00  0.00
ATOM   2272  CA  GLU   285      49.830  85.917  57.558  1.00  0.00
ATOM   2273  CB  GLU   285      49.543  86.918  58.721  1.00  0.00
ATOM   2274  CG  GLU   285      49.611  86.106  60.041  1.00  0.00
ATOM   2275  CD  GLU   285      49.535  87.151  61.212  1.00  0.00
ATOM   2276  OE1 GLU   285      50.635  87.421  61.715  1.00  0.00
ATOM   2277  OE2 GLU   285      48.393  87.606  61.579  1.00  0.00
ATOM   2278  C   GLU   285      48.594  85.080  57.158  1.00  0.00
ATOM   2279  O   GLU   285      48.424  83.965  57.630  1.00  0.00
ATOM   2280  N   LYS   286      47.741  85.559  56.253  1.00  0.00
ATOM   2281  CA  LYS   286      46.610  84.913  55.537  1.00  0.00
ATOM   2282  CB  LYS   286      46.001  85.983  54.694  1.00  0.00
ATOM   2283  CG  LYS   286      44.840  85.604  53.836  1.00  0.00
ATOM   2284  CD  LYS   286      44.281  86.713  52.969  1.00  0.00
ATOM   2285  CE  LYS   286      43.767  87.865  53.848  1.00  0.00
ATOM   2286  NZ  LYS   286      42.979  88.874  53.149  1.00  0.00
ATOM   2287  C   LYS   286      47.020  83.659  54.810  1.00  0.00
ATOM   2288  O   LYS   286      46.348  82.608  54.944  1.00  0.00
ATOM   2289  N   SER   287      48.054  83.811  53.959  1.00  0.00
ATOM   2290  CA  SER   287      48.673  82.717  53.161  1.00  0.00
ATOM   2291  CB  SER   287      49.755  83.262  52.354  1.00  0.00
ATOM   2292  OG  SER   287      49.201  84.387  51.661  1.00  0.00
ATOM   2293  C   SER   287      49.192  81.613  54.113  1.00  0.00
ATOM   2294  O   SER   287      49.152  80.479  53.715  1.00  0.00
ATOM   2295  N   HID   288      49.576  81.939  55.320  1.00  0.00
ATOM   2296  CA  HID   288      49.917  81.010  56.389  1.00  0.00
ATOM   2297  CB  HID   288      50.963  81.730  57.279  1.00  0.00
ATOM   2298  CG  HID   288      51.234  81.074  58.587  1.00  0.00
ATOM   2299  ND1 HID   288      52.233  80.121  58.873  1.00  0.00
ATOM   2300  CE1 HID   288      52.057  79.728  60.171  1.00  0.00
ATOM   2301  NE2 HID   288      51.007  80.343  60.740  1.00  0.00
ATOM   2302  CD2 HID   288      50.478  81.262  59.785  1.00  0.00
ATOM   2303  C   HID   288      48.693  80.380  57.113  1.00  0.00
ATOM   2304  O   HID   288      48.734  79.186  57.352  1.00  0.00
ATOM   2305  N   CYX   289      47.658  81.209  57.468  1.00  0.00
ATOM   2306  CA  CYX   289      46.529  80.822  58.239  1.00  0.00
ATOM   2307  CB  CYX   289      45.847  82.132  58.615  1.00  0.00
ATOM   2308  SG  CYX   289      44.555  81.900  59.842  1.00  0.00
ATOM   2309  C   CYX   289      45.748  79.718  57.466  1.00  0.00
ATOM   2310  O   CYX   289      45.378  78.698  58.071  1.00  0.00
ATOM   2311  N   ILE   290      45.430  79.881  56.187  1.00  0.00
ATOM   2312  CA  ILE   290      44.579  79.006  55.297  1.00  0.00
ATOM   2313  CB  ILE   290      44.342  79.597  53.852  1.00  0.00
ATOM   2314  CG2 ILE   290      43.592  80.880  54.192  1.00  0.00
ATOM   2315  CG1 ILE   290      45.595  79.866  53.020  1.00  0.00
ATOM   2316  CD1 ILE   290      46.267  78.645  52.329  1.00  0.00
ATOM   2317  C   ILE   290      45.019  77.515  55.169  1.00  0.00
ATOM   2318  O   ILE   290      44.233  76.622  54.813  1.00  0.00
ATOM   2319  N   ALA   291      46.306  77.251  55.417  1.00  0.00
ATOM   2320  CA  ALA   291      47.033  76.017  55.443  1.00  0.00
ATOM   2321  CB  ALA   291      48.445  76.403  54.936  1.00  0.00
ATOM   2322  C   ALA   291      47.105  75.380  56.876  1.00  0.00
ATOM   2323  O   ALA   291      47.447  74.173  57.037  1.00  0.00
ATOM   2324  N   GLU   292      46.949  76.168  57.967  1.00  0.00
ATOM   2325  CA  GLU   292      47.172  75.744  59.375  1.00  0.00
ATOM   2326  CB  GLU   292      48.439  76.327  60.117  1.00  0.00
ATOM   2327  CG  GLU   292      49.754  76.013  59.334  1.00  0.00
ATOM   2328  CD  GLU   292      50.427  74.618  59.618  1.00  0.00
ATOM   2329  OE1 GLU   292      49.731  73.688  60.025  1.00  0.00
ATOM   2330  OE2 GLU   292      51.626  74.556  59.411  1.00  0.00
ATOM   2331  C   GLU   292      45.850  75.826  60.256  1.00  0.00
ATOM   2332  O   GLU   292      45.742  75.315  61.369  1.00  0.00
ATOM   2333  N   VAL   293      44.813  76.413  59.625  1.00  0.00
ATOM   2334  CA  VAL   293      43.331  76.263  60.116  1.00  0.00
ATOM   2335  CB  VAL   293      42.442  76.695  58.943  1.00  0.00
ATOM   2336  CG1 VAL   293      42.119  75.557  57.973  1.00  0.00
ATOM   2337  CG2 VAL   293      41.110  77.263  59.513  1.00  0.00
ATOM   2338  C   VAL   293      43.005  74.826  60.677  1.00  0.00
ATOM   2339  O   VAL   293      43.431  73.806  60.145  1.00  0.00
ATOM   2340  N   GLU   294      42.107  74.699  61.658  1.00  0.00
ATOM   2341  CA  GLU   294      41.455  73.471  62.078  1.00  0.00
ATOM   2342  CB  GLU   294      40.987  73.679  63.539  1.00  0.00
ATOM   2343  CG  GLU   294      39.722  74.574  63.663  1.00  0.00
ATOM   2344  CD  GLU   294      39.252  74.530  65.118  1.00  0.00
ATOM   2345  OE1 GLU   294      40.012  74.588  66.167  1.00  0.00
ATOM   2346  OE2 GLU   294      38.025  74.411  65.332  1.00  0.00
ATOM   2347  C   GLU   294      40.413  73.017  61.118  1.00  0.00
ATOM   2348  O   GLU   294      39.887  73.804  60.256  1.00  0.00
ATOM   2349  N   ASN   295      40.038  71.730  61.260  1.00  0.00
ATOM   2350  CA  ASN   295      39.062  71.155  60.330  1.00  0.00
ATOM   2351  CB  ASN   295      39.040  69.625  60.304  1.00  0.00
ATOM   2352  CG  ASN   295      38.327  68.978  61.447  1.00  0.00
ATOM   2353  OD1 ASN   295      38.776  69.003  62.595  1.00  0.00
ATOM   2354  ND2 ASN   295      37.088  68.584  61.227  1.00  0.00
ATOM   2355  C   ASN   295      37.669  71.742  60.519  1.00  0.00
ATOM   2356  O   ASN   295      37.195  71.800  61.655  1.00  0.00
ATOM   2357  N   ASP   296      36.935  72.174  59.444  1.00  0.00
ATOM   2358  CA  ASP   296      35.496  72.432  59.452  1.00  0.00
ATOM   2359  CB  ASP   296      34.970  72.975  58.132  1.00  0.00
ATOM   2360  CG  ASP   296      33.546  73.670  58.277  1.00  0.00
ATOM   2361  OD1 ASP   296      33.051  74.233  57.289  1.00  0.00
ATOM   2362  OD2 ASP   296      32.929  73.620  59.332  1.00  0.00
ATOM   2363  C   ASP   296      34.825  71.100  59.807  1.00  0.00
ATOM   2364  O   ASP   296      35.285  70.046  59.520  1.00  0.00
ATOM   2365  N   GLU   297      33.727  71.155  60.615  1.00  0.00
ATOM   2366  CA  GLU   297      33.092  69.933  61.226  1.00  0.00
ATOM   2367  CB  GLU   297      31.942  70.342  62.239  1.00  0.00
ATOM   2368  CG  GLU   297      32.265  71.428  63.229  1.00  0.00
ATOM   2369  CD  GLU   297      33.499  71.212  64.208  1.00  0.00
ATOM   2370  OE1 GLU   297      33.771  69.988  64.492  1.00  0.00
ATOM   2371  OE2 GLU   297      34.202  72.157  64.592  1.00  0.00
ATOM   2372  C   GLU   297      32.602  68.874  60.269  1.00  0.00
ATOM   2373  O   GLU   297      31.995  69.251  59.274  1.00  0.00
ATOM   2374  N   MET   298      32.927  67.592  60.524  1.00  0.00
ATOM   2375  CA  MET   298      32.813  66.516  59.547  1.00  0.00
ATOM   2376  CB  MET   298      33.359  65.213  60.156  1.00  0.00
ATOM   2377  CG  MET   298      33.213  63.918  59.381  1.00  0.00
ATOM   2378  SD  MET   298      34.015  62.538  60.222  1.00  0.00
ATOM   2379  CE  MET   298      33.263  62.599  61.962  1.00  0.00
ATOM   2380  C   MET   298      31.329  66.374  59.127  1.00  0.00
ATOM   2381  O   MET   298      30.434  66.375  60.038  1.00  0.00
ATOM   2382  N   PRO   299      30.906  66.204  57.834  1.00  0.00
ATOM   2383  CD  PRO   299      31.675  66.023  56.665  1.00  0.00
ATOM   2384  CG  PRO   299      30.730  65.694  55.466  1.00  0.00
ATOM   2385  CB  PRO   299      29.335  66.189  55.977  1.00  0.00
ATOM   2386  CA  PRO   299      29.459  66.102  57.525  1.00  0.00
ATOM   2387  C   PRO   299      28.896  64.793  58.056  1.00  0.00
ATOM   2388  O   PRO   299      29.569  63.688  58.154  1.00  0.00
ATOM   2389  N   ALA   300      27.662  64.931  58.481  1.00  0.00
ATOM   2390  CA  ALA   300      26.776  63.965  59.038  1.00  0.00
ATOM   2391  CB  ALA   300      25.922  64.547  60.168  1.00  0.00
ATOM   2392  C   ALA   300      25.958  63.208  58.003  1.00  0.00
ATOM   2393  O   ALA   300      25.649  63.855  56.951  1.00  0.00
ATOM   2394  N   ASP   301      25.436  61.993  58.336  1.00  0.00
ATOM   2395  CA  ASP   301      24.459  61.113  57.642  1.00  0.00
ATOM   2396  CB  ASP   301      23.021  61.593  57.980  1.00  0.00
ATOM   2397  CG  ASP   301      21.935  60.666  57.486  1.00  0.00
ATOM   2398  OD1 ASP   301      22.146  59.537  57.063  1.00  0.00
ATOM   2399  OD2 ASP   301      20.772  61.054  57.496  1.00  0.00
ATOM   2400  C   ASP   301      24.758  60.883  56.138  1.00  0.00
ATOM   2401  O   ASP   301      24.128  61.396  55.237  1.00  0.00
ATOM   2402  N   LEU   302      25.877  60.121  55.834  1.00  0.00
ATOM   2403  CA  LEU   302      26.388  59.870  54.462  1.00  0.00
ATOM   2404  CB  LEU   302      27.915  60.007  54.450  1.00  0.00
ATOM   2405  CG  LEU   302      28.411  61.497  54.563  1.00  0.00
ATOM   2406  CD1 LEU   302      29.925  61.397  54.650  1.00  0.00
ATOM   2407  CD2 LEU   302      27.835  62.477  53.569  1.00  0.00
ATOM   2408  C   LEU   302      26.004  58.541  53.900  1.00  0.00
ATOM   2409  O   LEU   302      26.053  57.581  54.695  1.00  0.00
ATOM   2410  N   PRO   303      25.893  58.348  52.545  1.00  0.00
ATOM   2411  CD  PRO   303      26.261  59.352  51.526  1.00  0.00
ATOM   2412  CG  PRO   303      26.166  58.689  50.132  1.00  0.00
ATOM   2413  CB  PRO   303      25.258  57.532  50.402  1.00  0.00
ATOM   2414  CA  PRO   303      25.448  57.147  51.873  1.00  0.00
ATOM   2415  C   PRO   303      26.447  55.982  51.950  1.00  0.00
ATOM   2416  O   PRO   303      27.656  56.157  52.131  1.00  0.00
ATOM   2417  N   SER   304      25.920  54.748  51.808  1.00  0.00
ATOM   2418  CA  SER   304      26.778  53.624  51.863  1.00  0.00
ATOM   2419  CB  SER   304      25.982  52.355  51.751  1.00  0.00
ATOM   2420  OG  SER   304      26.687  51.220  51.411  1.00  0.00
ATOM   2421  C   SER   304      27.920  53.572  50.845  1.00  0.00
ATOM   2422  O   SER   304      27.635  53.472  49.608  1.00  0.00
ATOM   2423  N   LEU   305      29.162  53.538  51.293  1.00  0.00
ATOM   2424  CA  LEU   305      30.447  53.721  50.590  1.00  0.00
ATOM   2425  CB  LEU   305      31.532  53.837  51.642  1.00  0.00
ATOM   2426  CG  LEU   305      32.982  54.094  51.145  1.00  0.00
ATOM   2427  CD1 LEU   305      32.924  55.302  50.080  1.00  0.00
ATOM   2428  CD2 LEU   305      33.880  54.439  52.297  1.00  0.00
ATOM   2429  C   LEU   305      30.578  52.586  49.548  1.00  0.00
ATOM   2430  O   LEU   305      31.379  52.662  48.594  1.00  0.00
ATOM   2431  N   ALA   306      29.904  51.475  49.758  1.00  0.00
ATOM   2432  CA  ALA   306      30.025  50.245  48.942  1.00  0.00
ATOM   2433  CB  ALA   306      29.526  49.149  49.805  1.00  0.00
ATOM   2434  C   ALA   306      29.291  50.467  47.559  1.00  0.00
ATOM   2435  O   ALA   306      29.625  49.899  46.509  1.00  0.00
ATOM   2436  N   ALA   307      28.192  51.176  47.646  1.00  0.00
ATOM   2437  CA  ALA   307      27.139  51.206  46.602  1.00  0.00
ATOM   2438  CB  ALA   307      26.083  52.115  47.226  1.00  0.00
ATOM   2439  C   ALA   307      27.644  51.867  45.336  1.00  0.00
ATOM   2440  O   ALA   307      27.193  51.505  44.259  1.00  0.00
ATOM   2441  N   ASP   308      28.679  52.752  45.527  1.00  0.00
ATOM   2442  CA  ASP   308      29.412  53.271  44.368  1.00  0.00
ATOM   2443  CB  ASP   308      29.235  54.787  44.353  1.00  0.00
ATOM   2444  CG  ASP   308      27.784  55.192  44.486  1.00  0.00
ATOM   2445  OD1 ASP   308      27.453  55.923  45.406  1.00  0.00
ATOM   2446  OD2 ASP   308      26.969  54.752  43.635  1.00  0.00
ATOM   2447  C   ASP   308      30.912  52.784  44.307  1.00  0.00
ATOM   2448  O   ASP   308      31.526  53.091  43.296  1.00  0.00
ATOM   2449  N   PHE   309      31.504  51.895  45.211  1.00  0.00
ATOM   2450  CA  PHE   309      32.875  51.459  45.031  1.00  0.00
ATOM   2451  CB  PHE   309      33.785  52.346  45.922  1.00  0.00
ATOM   2452  CG  PHE   309      34.056  53.761  45.539  1.00  0.00
ATOM   2453  CD1 PHE   309      35.067  54.231  44.690  1.00  0.00
ATOM   2454  CE1 PHE   309      35.431  55.626  44.757  1.00  0.00
ATOM   2455  CZ  PHE   309      34.733  56.543  45.492  1.00  0.00
ATOM   2456  CE2 PHE   309      33.690  56.089  46.286  1.00  0.00
ATOM   2457  CD2 PHE   309      33.327  54.716  46.329  1.00  0.00
ATOM   2458  C   PHE   309      33.157  49.948  45.143  1.00  0.00
ATOM   2459  O   PHE   309      34.237  49.538  44.661  1.00  0.00
ATOM   2460  N   VAL   310      32.224  49.123  45.708  1.00  0.00
ATOM   2461  CA  VAL   310      32.433  47.722  45.993  1.00  0.00
ATOM   2462  CB  VAL   310      32.665  47.505  47.516  1.00  0.00
ATOM   2463  CG1 VAL   310      33.009  46.067  47.847  1.00  0.00
ATOM   2464  CG2 VAL   310      33.859  48.393  47.911  1.00  0.00
ATOM   2465  C   VAL   310      31.359  46.811  45.380  1.00  0.00
ATOM   2466  O   VAL   310      31.648  45.686  44.998  1.00  0.00
ATOM   2467  N   GLU   311      30.171  47.361  45.393  1.00  0.00
ATOM   2468  CA  GLU   311      29.010  46.725  44.806  1.00  0.00
ATOM   2469  CB  GLU   311      27.792  46.993  45.749  1.00  0.00
ATOM   2470  CG  GLU   311      27.870  46.601  47.274  1.00  0.00
ATOM   2471  CD  GLU   311      26.538  47.028  48.039  1.00  0.00
ATOM   2472  OE1 GLU   311      26.616  47.433  49.251  1.00  0.00
ATOM   2473  OE2 GLU   311      25.421  46.872  47.488  1.00  0.00
ATOM   2474  C   GLU   311      28.573  47.221  43.385  1.00  0.00
ATOM   2475  O   GLU   311      27.923  46.482  42.636  1.00  0.00
ATOM   2476  N   SER   312      28.891  48.490  43.005  1.00  0.00
ATOM   2477  CA  SER   312      28.922  48.931  41.608  1.00  0.00
ATOM   2478  CB  SER   312      29.580  50.326  41.640  1.00  0.00
ATOM   2479  OG  SER   312      29.484  51.006  40.405  1.00  0.00
ATOM   2480  C   SER   312      29.672  48.046  40.613  1.00  0.00
ATOM   2481  O   SER   312      30.749  47.471  40.840  1.00  0.00
ATOM   2482  N   LYS   313      29.035  47.980  39.479  1.00  0.00
ATOM   2483  CA  LYS   313      29.591  47.335  38.223  1.00  0.00
ATOM   2484  CB  LYS   313      28.526  46.527  37.387  1.00  0.00
ATOM   2485  CG  LYS   313      27.746  45.484  38.145  1.00  0.00
ATOM   2486  CD  LYS   313      27.188  44.424  37.203  1.00  0.00
ATOM   2487  CE  LYS   313      26.575  43.214  37.994  1.00  0.00
ATOM   2488  NZ  LYS   313      26.169  42.091  37.161  1.00  0.00
ATOM   2489  C   LYS   313      30.462  48.250  37.384  1.00  0.00
ATOM   2490  O   LYS   313      31.061  47.758  36.444  1.00  0.00
ATOM   2491  N   ASP   314      30.607  49.518  37.654  1.00  0.00
ATOM   2492  CA  ASP   314      31.324  50.550  36.870  1.00  0.00
ATOM   2493  CB  ASP   314      30.638  51.852  36.804  1.00  0.00
ATOM   2494  CG  ASP   314      29.180  51.744  36.442  1.00  0.00
ATOM   2495  OD1 ASP   314      28.803  50.979  35.538  1.00  0.00
ATOM   2496  OD2 ASP   314      28.382  52.459  37.081  1.00  0.00
ATOM   2497  C   ASP   314      32.778  50.733  37.410  1.00  0.00
ATOM   2498  O   ASP   314      33.554  51.422  36.723  1.00  0.00
ATOM   2499  N   VAL   315      33.136  50.097  38.569  1.00  0.00
ATOM   2500  CA  VAL   315      34.483  50.247  39.176  1.00  0.00
ATOM   2501  CB  VAL   315      34.591  49.226  40.289  1.00  0.00
ATOM   2502  CG1 VAL   315      36.085  49.104  40.860  1.00  0.00
ATOM   2503  CG2 VAL   315      33.644  49.425  41.484  1.00  0.00
ATOM   2504  C   VAL   315      35.658  50.110  38.234  1.00  0.00
ATOM   2505  O   VAL   315      36.421  51.014  38.231  1.00  0.00
ATOM   2506  N   CYX   316      35.676  49.083  37.370  1.00  0.00
ATOM   2507  CA  CYX   316      36.756  48.875  36.473  1.00  0.00
ATOM   2508  CB  CYX   316      36.825  47.388  36.104  1.00  0.00
ATOM   2509  SG  CYX   316      37.557  46.335  37.378  1.00  0.00
ATOM   2510  C   CYX   316      36.751  49.757  35.178  1.00  0.00
ATOM   2511  O   CYX   316      37.664  49.710  34.391  1.00  0.00
ATOM   2512  N   LYS   317      35.590  50.427  34.912  1.00  0.00
ATOM   2513  CA  LYS   317      35.586  51.458  33.882  1.00  0.00
ATOM   2514  CB  LYS   317      34.147  51.604  33.463  1.00  0.00
ATOM   2515  CG  LYS   317      34.042  52.385  32.166  1.00  0.00
ATOM   2516  CD  LYS   317      32.599  52.620  31.760  1.00  0.00
ATOM   2517  CE  LYS   317      32.547  53.501  30.565  1.00  0.00
ATOM   2518  NZ  LYS   317      33.077  52.930  29.280  1.00  0.00
ATOM   2519  C   LYS   317      36.107  52.834  34.421  1.00  0.00
ATOM   2520  O   LYS   317      37.071  53.335  33.833  1.00  0.00
ATOM   2521  N   ASN   318      35.665  53.244  35.631  1.00  0.00
ATOM   2522  CA  ASN   318      36.108  54.466  36.271  1.00  0.00
ATOM   2523  CB  ASN   318      35.255  54.690  37.516  1.00  0.00
ATOM   2524  CG  ASN   318      33.773  55.003  37.480  1.00  0.00
ATOM   2525  OD1 ASN   318      33.383  56.000  36.942  1.00  0.00
ATOM   2526  ND2 ASN   318      32.909  54.270  38.079  1.00  0.00
ATOM   2527  C   ASN   318      37.633  54.359  36.614  1.00  0.00
ATOM   2528  O   ASN   318      38.329  55.325  36.342  1.00  0.00
ATOM   2529  N   TYR   319      38.131  53.154  37.049  1.00  0.00
ATOM   2530  CA  TYR   319      39.544  52.856  37.256  1.00  0.00
ATOM   2531  CB  TYR   319      39.602  51.497  37.963  1.00  0.00
ATOM   2532  CG  TYR   319      40.976  50.858  38.022  1.00  0.00
ATOM   2533  CD1 TYR   319      41.936  51.162  39.078  1.00  0.00
ATOM   2534  CE1 TYR   319      43.228  50.528  39.070  1.00  0.00
ATOM   2535  CZ  TYR   319      43.525  49.536  38.075  1.00  0.00
ATOM   2536  OH  TYR   319      44.792  49.030  38.002  1.00  0.00
ATOM   2537  CE2 TYR   319      42.529  49.209  37.168  1.00  0.00
ATOM   2538  CD2 TYR   319      41.295  49.831  37.101  1.00  0.00
ATOM   2539  C   TYR   319      40.475  52.886  35.957  1.00  0.00
ATOM   2540  O   TYR   319      41.729  52.881  36.018  1.00  0.00
ATOM   2541  N   ALA   320      39.797  52.843  34.770  1.00  0.00
ATOM   2542  CA  ALA   320      40.483  52.738  33.485  1.00  0.00
ATOM   2543  CB  ALA   320      40.029  51.470  32.737  1.00  0.00
ATOM   2544  C   ALA   320      40.323  53.962  32.545  1.00  0.00
ATOM   2545  O   ALA   320      41.237  54.393  31.840  1.00  0.00
ATOM   2546  N   GLU   321      39.207  54.710  32.641  1.00  0.00
ATOM   2547  CA  GLU   321      38.867  55.926  31.856  1.00  0.00
ATOM   2548  CB  GLU   321      37.538  55.781  31.218  1.00  0.00
ATOM   2549  CG  GLU   321      37.461  54.492  30.376  1.00  0.00
ATOM   2550  CD  GLU   321      36.077  54.242  29.685  1.00  0.00
ATOM   2551  OE1 GLU   321      35.138  55.112  29.711  1.00  0.00
ATOM   2552  OE2 GLU   321      35.860  53.162  29.036  1.00  0.00
ATOM   2553  C   GLU   321      38.967  57.189  32.625  1.00  0.00
ATOM   2554  O   GLU   321      38.884  58.141  31.940  1.00  0.00
ATOM   2555  N   ALA   322      38.899  57.171  33.926  1.00  0.00
ATOM   2556  CA  ALA   322      39.104  58.343  34.846  1.00  0.00
ATOM   2557  CB  ALA   322      37.828  59.081  34.976  1.00  0.00
ATOM   2558  C   ALA   322      39.826  57.916  36.171  1.00  0.00
ATOM   2559  O   ALA   322      39.279  58.208  37.257  1.00  0.00
ATOM   2560  N   LYS   323      41.012  57.265  36.220  1.00  0.00
ATOM   2561  CA  LYS   323      41.683  56.693  37.344  1.00  0.00
ATOM   2562  CB  LYS   323      42.864  55.837  36.950  1.00  0.00
ATOM   2563  CG  LYS   323      43.506  55.135  38.145  1.00  0.00
ATOM   2564  CD  LYS   323      44.763  54.400  37.812  1.00  0.00
ATOM   2565  CE  LYS   323      44.427  53.188  37.036  1.00  0.00
ATOM   2566  NZ  LYS   323      45.584  52.276  36.764  1.00  0.00
ATOM   2567  C   LYS   323      42.002  57.749  38.479  1.00  0.00
ATOM   2568  O   LYS   323      41.676  57.558  39.603  1.00  0.00
ATOM   2569  N   ASP   324      42.634  58.827  38.037  1.00  0.00
ATOM   2570  CA  ASP   324      43.103  59.814  39.001  1.00  0.00
ATOM   2571  CB  ASP   324      44.245  60.724  38.430  1.00  0.00
ATOM   2572  CG  ASP   324      45.273  60.129  37.487  1.00  0.00
ATOM   2573  OD1 ASP   324      45.273  58.875  37.416  1.00  0.00
ATOM   2574  OD2 ASP   324      46.081  60.850  36.905  1.00  0.00
ATOM   2575  C   ASP   324      41.946  60.630  39.524  1.00  0.00
ATOM   2576  O   ASP   324      42.104  61.320  40.523  1.00  0.00
ATOM   2577  N   VAL   325      40.784  60.530  38.886  1.00  0.00
ATOM   2578  CA  VAL   325      39.508  61.035  39.399  1.00  0.00
ATOM   2579  CB  VAL   325      38.506  61.266  38.225  1.00  0.00
ATOM   2580  CG1 VAL   325      37.200  61.879  38.659  1.00  0.00
ATOM   2581  CG2 VAL   325      39.092  62.204  37.157  1.00  0.00
ATOM   2582  C   VAL   325      38.866  60.036  40.376  1.00  0.00
ATOM   2583  O   VAL   325      38.422  60.384  41.447  1.00  0.00
ATOM   2584  N   PHE   326      38.895  58.773  40.047  1.00  0.00
ATOM   2585  CA  PHE   326      38.243  57.722  40.820  1.00  0.00
ATOM   2586  CB  PHE   326      38.036  56.558  39.866  1.00  0.00
ATOM   2587  CG  PHE   326      37.272  55.382  40.457  1.00  0.00
ATOM   2588  CD1 PHE   326      36.038  55.621  41.103  1.00  0.00
ATOM   2589  CE1 PHE   326      35.292  54.539  41.606  1.00  0.00
ATOM   2590  CZ  PHE   326      35.821  53.223  41.557  1.00  0.00
ATOM   2591  CE2 PHE   326      36.995  52.961  40.892  1.00  0.00
ATOM   2592  CD2 PHE   326      37.763  54.095  40.457  1.00  0.00
ATOM   2593  C   PHE   326      39.007  57.265  42.039  1.00  0.00
ATOM   2594  O   PHE   326      38.405  57.168  43.117  1.00  0.00
ATOM   2595  N   LEU   327      40.384  57.125  42.011  1.00  0.00
ATOM   2596  CA  LEU   327      41.191  56.947  43.228  1.00  0.00
ATOM   2597  CB  LEU   327      42.626  56.502  42.911  1.00  0.00
ATOM   2598  CG  LEU   327      42.794  55.228  42.012  1.00  0.00
ATOM   2599  CD1 LEU   327      44.329  55.044  41.667  1.00  0.00
ATOM   2600  CD2 LEU   327      42.329  53.955  42.750  1.00  0.00
ATOM   2601  C   LEU   327      41.241  58.252  44.148  1.00  0.00
ATOM   2602  O   LEU   327      41.356  58.189  45.374  1.00  0.00
ATOM   2603  N   GLY   328      41.135  59.359  43.489  1.00  0.00
ATOM   2604  CA  GLY   328      40.928  60.684  44.082  1.00  0.00
ATOM   2605  C   GLY   328      39.646  60.748  44.933  1.00  0.00
ATOM   2606  O   GLY   328      39.607  61.006  46.146  1.00  0.00
ATOM   2607  N   MET   329      38.532  60.257  44.294  1.00  0.00
ATOM   2608  CA  MET   329      37.193  60.333  44.875  1.00  0.00
ATOM   2609  CB  MET   329      36.141  60.076  43.759  1.00  0.00
ATOM   2610  CG  MET   329      34.642  60.108  44.191  1.00  0.00
ATOM   2611  SD  MET   329      34.088  61.710  44.903  1.00  0.00
ATOM   2612  CE  MET   329      32.712  61.003  45.880  1.00  0.00
ATOM   2613  C   MET   329      36.961  59.355  46.080  1.00  0.00
ATOM   2614  O   MET   329      36.210  59.615  47.025  1.00  0.00
ATOM   2615  N   PHE   330      37.679  58.240  45.986  1.00  0.00
ATOM   2616  CA  PHE   330      37.911  57.266  47.088  1.00  0.00
ATOM   2617  CB  PHE   330      38.829  56.060  46.521  1.00  0.00
ATOM   2618  CG  PHE   330      39.041  54.851  47.438  1.00  0.00
ATOM   2619  CD1 PHE   330      38.025  53.898  47.409  1.00  0.00
ATOM   2620  CE1 PHE   330      38.139  52.708  48.088  1.00  0.00
ATOM   2621  CZ  PHE   330      39.282  52.524  48.869  1.00  0.00
ATOM   2622  CE2 PHE   330      40.353  53.492  48.911  1.00  0.00
ATOM   2623  CD2 PHE   330      40.216  54.662  48.202  1.00  0.00
ATOM   2624  C   PHE   330      38.610  57.946  48.322  1.00  0.00
ATOM   2625  O   PHE   330      38.064  57.882  49.410  1.00  0.00
ATOM   2626  N   LEU   331      39.740  58.644  48.084  1.00  0.00
ATOM   2627  CA  LEU   331      40.522  59.263  49.121  1.00  0.00
ATOM   2628  CB  LEU   331      41.907  59.660  48.568  1.00  0.00
ATOM   2629  CG  LEU   331      42.820  58.367  48.456  1.00  0.00
ATOM   2630  CD1 LEU   331      43.975  58.404  47.430  1.00  0.00
ATOM   2631  CD2 LEU   331      43.358  58.161  49.870  1.00  0.00
ATOM   2632  C   LEU   331      39.723  60.366  49.803  1.00  0.00
ATOM   2633  O   LEU   331      39.710  60.514  51.010  1.00  0.00
ATOM   2634  N   TYR   332      38.954  61.047  49.001  1.00  0.00
ATOM   2635  CA  TYR   332      38.013  62.077  49.352  1.00  0.00
ATOM   2636  CB  TYR   332      37.499  62.643  48.056  1.00  0.00
ATOM   2637  CG  TYR   332      36.313  63.637  48.261  1.00  0.00
ATOM   2638  CD1 TYR   332      36.550  65.031  48.632  1.00  0.00
ATOM   2639  CE1 TYR   332      35.429  65.955  48.696  1.00  0.00
ATOM   2640  CZ  TYR   332      34.080  65.455  48.631  1.00  0.00
ATOM   2641  OH  TYR   332      32.979  66.206  49.006  1.00  0.00
ATOM   2642  CE2 TYR   332      33.871  64.093  48.370  1.00  0.00
ATOM   2643  CD2 TYR   332      34.972  63.206  48.161  1.00  0.00
ATOM   2644  C   TYR   332      36.858  61.538  50.259  1.00  0.00
ATOM   2645  O   TYR   332      36.683  62.121  51.300  1.00  0.00
ATOM   2646  N   GLU   333      36.185  60.426  49.876  1.00  0.00
ATOM   2647  CA  GLU   333      35.183  59.822  50.722  1.00  0.00
ATOM   2648  CB  GLU   333      34.468  58.686  49.956  1.00  0.00
ATOM   2649  CG  GLU   333      33.239  59.283  49.157  1.00  0.00
ATOM   2650  CD  GLU   333      31.996  59.430  50.040  1.00  0.00
ATOM   2651  OE1 GLU   333      30.870  59.321  49.560  1.00  0.00
ATOM   2652  OE2 GLU   333      32.052  59.852  51.204  1.00  0.00
ATOM   2653  C   GLU   333      35.741  59.382  52.063  1.00  0.00
ATOM   2654  O   GLU   333      35.172  59.758  53.077  1.00  0.00
ATOM   2655  N   TYR   334      36.812  58.566  52.104  1.00  0.00
ATOM   2656  CA  TYR   334      37.424  58.119  53.412  1.00  0.00
ATOM   2657  CB  TYR   334      38.605  57.208  53.279  1.00  0.00
ATOM   2658  CG  TYR   334      38.396  55.697  53.287  1.00  0.00
ATOM   2659  CD1 TYR   334      38.673  54.957  54.463  1.00  0.00
ATOM   2660  CE1 TYR   334      38.578  53.562  54.575  1.00  0.00
ATOM   2661  CZ  TYR   334      38.031  52.875  53.428  1.00  0.00
ATOM   2662  OH  TYR   334      37.579  51.644  53.456  1.00  0.00
ATOM   2663  CE2 TYR   334      37.733  53.624  52.270  1.00  0.00
ATOM   2664  CD2 TYR   334      38.035  55.020  52.142  1.00  0.00
ATOM   2665  C   TYR   334      37.676  59.341  54.266  1.00  0.00
ATOM   2666  O   TYR   334      37.420  59.289  55.467  1.00  0.00
ATOM   2667  N   ALA   335      38.348  60.389  53.718  1.00  0.00
ATOM   2668  CA  ALA   335      38.809  61.575  54.451  1.00  0.00
ATOM   2669  CB  ALA   335      39.703  62.367  53.520  1.00  0.00
ATOM   2670  C   ALA   335      37.706  62.401  55.002  1.00  0.00
ATOM   2671  O   ALA   335      37.821  62.713  56.195  1.00  0.00
ATOM   2672  N   ARG   336      36.558  62.461  54.300  1.00  0.00
ATOM   2673  CA  ARG   336      35.393  63.102  54.980  1.00  0.00
ATOM   2674  CB  ARG   336      34.503  63.977  54.014  1.00  0.00
ATOM   2675  CG  ARG   336      33.808  63.016  53.081  1.00  0.00
ATOM   2676  CD  ARG   336      32.651  63.671  52.233  1.00  0.00
ATOM   2677  NE  ARG   336      31.757  62.612  51.721  1.00  0.00
ATOM   2678  CZ  ARG   336      30.594  62.806  51.113  1.00  0.00
ATOM   2679  NH1 ARG   336      30.040  61.875  50.397  1.00  0.00
ATOM   2680  NH2 ARG   336      29.975  63.954  50.919  1.00  0.00
ATOM   2681  C   ARG   336      34.623  62.213  56.033  1.00  0.00
ATOM   2682  O   ARG   336      33.532  62.587  56.448  1.00  0.00
ATOM   2683  N   ARG   337      35.095  60.992  56.387  1.00  0.00
ATOM   2684  CA  ARG   337      34.515  60.018  57.288  1.00  0.00
ATOM   2685  CB  ARG   337      34.107  58.897  56.398  1.00  0.00
ATOM   2686  CG  ARG   337      32.995  59.229  55.461  1.00  0.00
ATOM   2687  CD  ARG   337      32.391  57.953  54.849  1.00  0.00
ATOM   2688  NE  ARG   337      31.531  58.252  53.634  1.00  0.00
ATOM   2689  CZ  ARG   337      30.431  57.579  53.252  1.00  0.00
ATOM   2690  NH1 ARG   337      29.954  57.944  52.060  1.00  0.00
ATOM   2691  NH2 ARG   337      29.916  56.571  53.899  1.00  0.00
ATOM   2692  C   ARG   337      35.497  59.491  58.342  1.00  0.00
ATOM   2693  O   ARG   337      35.050  58.954  59.358  1.00  0.00
ATOM   2694  N   HID   338      36.802  59.739  58.204  1.00  0.00
ATOM   2695  CA  HID   338      37.888  59.409  59.120  1.00  0.00
ATOM   2696  CB  HID   338      38.537  58.095  58.824  1.00  0.00
ATOM   2697  CG  HID   338      37.647  56.871  58.774  1.00  0.00
ATOM   2698  ND1 HID   338      37.592  55.870  59.699  1.00  0.00
ATOM   2699  CE1 HID   338      37.029  54.797  59.156  1.00  0.00
ATOM   2700  NE2 HID   338      36.502  55.045  57.959  1.00  0.00
ATOM   2701  CD2 HID   338      36.843  56.400  57.709  1.00  0.00
ATOM   2702  C   HID   338      39.003  60.556  59.219  1.00  0.00
ATOM   2703  O   HID   338      40.164  60.288  58.889  1.00  0.00
ATOM   2704  N   PRO   339      38.563  61.736  59.600  1.00  0.00
ATOM   2705  CD  PRO   339      37.210  62.195  60.028  1.00  0.00
ATOM   2706  CG  PRO   339      37.519  63.318  60.917  1.00  0.00
ATOM   2707  CB  PRO   339      38.546  64.007  60.162  1.00  0.00
ATOM   2708  CA  PRO   339      39.469  62.908  59.805  1.00  0.00
ATOM   2709  C   PRO   339      40.614  62.712  60.808  1.00  0.00
ATOM   2710  O   PRO   339      41.625  63.402  60.764  1.00  0.00
ATOM   2711  N   ASP   340      40.366  61.739  61.714  1.00  0.00
ATOM   2712  CA  ASP   340      41.200  61.480  62.895  1.00  0.00
ATOM   2713  CB  ASP   340      40.364  60.989  64.098  1.00  0.00
ATOM   2714  CG  ASP   340      39.432  59.880  63.778  1.00  0.00
ATOM   2715  OD1 ASP   340      39.273  59.041  64.661  1.00  0.00
ATOM   2716  OD2 ASP   340      38.861  59.810  62.613  1.00  0.00
ATOM   2717  C   ASP   340      42.372  60.509  62.757  1.00  0.00
ATOM   2718  O   ASP   340      43.103  60.292  63.771  1.00  0.00
ATOM   2719  N   TYR   341      42.540  59.908  61.624  1.00  0.00
ATOM   2720  CA  TYR   341      43.547  58.960  61.328  1.00  0.00
ATOM   2721  CB  TYR   341      43.005  57.729  60.584  1.00  0.00
ATOM   2722  CG  TYR   341      42.070  56.771  61.405  1.00  0.00
ATOM   2723  CD1 TYR   341      41.557  55.633  60.662  1.00  0.00
ATOM   2724  CE1 TYR   341      40.840  54.612  61.326  1.00  0.00
ATOM   2725  CZ  TYR   341      40.477  54.790  62.682  1.00  0.00
ATOM   2726  OH  TYR   341      39.663  53.799  63.220  1.00  0.00
ATOM   2727  CE2 TYR   341      41.051  55.788  63.437  1.00  0.00
ATOM   2728  CD2 TYR   341      41.838  56.779  62.772  1.00  0.00
ATOM   2729  C   TYR   341      44.661  59.638  60.430  1.00  0.00
ATOM   2730  O   TYR   341      44.498  60.721  59.918  1.00  0.00
ATOM   2731  N   SER   342      45.813  58.927  60.230  1.00  0.00
ATOM   2732  CA  SER   342      46.952  59.546  59.589  1.00  0.00
ATOM   2733  CB  SER   342      48.219  58.789  59.783  1.00  0.00
ATOM   2734  OG  SER   342      47.943  57.422  59.732  1.00  0.00
ATOM   2735  C   SER   342      46.702  59.651  58.133  1.00  0.00
ATOM   2736  O   SER   342      46.094  58.723  57.520  1.00  0.00
ATOM   2737  N   VAL   343      47.189  60.710  57.374  1.00  0.00
ATOM   2738  CA  VAL   343      46.945  60.758  55.846  1.00  0.00
ATOM   2739  CB  VAL   343      47.345  62.065  55.223  1.00  0.00
ATOM   2740  CG1 VAL   343      48.844  62.227  55.285  1.00  0.00
ATOM   2741  CG2 VAL   343      46.875  62.301  53.811  1.00  0.00
ATOM   2742  C   VAL   343      47.529  59.564  55.122  1.00  0.00
ATOM   2743  O   VAL   343      46.929  59.073  54.184  1.00  0.00
ATOM   2744  N   VAL   344      48.724  59.048  55.475  1.00  0.00
ATOM   2745  CA  VAL   344      49.276  57.804  54.776  1.00  0.00
ATOM   2746  CB  VAL   344      50.779  57.811  55.141  1.00  0.00
ATOM   2747  CG1 VAL   344      51.397  59.068  54.512  1.00  0.00
ATOM   2748  CG2 VAL   344      51.215  57.763  56.626  1.00  0.00
ATOM   2749  C   VAL   344      48.651  56.452  55.310  1.00  0.00
ATOM   2750  O   VAL   344      48.813  55.499  54.559  1.00  0.00
ATOM   2751  N   LEU   345      47.710  56.385  56.255  1.00  0.00
ATOM   2752  CA  LEU   345      46.866  55.204  56.347  1.00  0.00
ATOM   2753  CB  LEU   345      46.277  55.262  57.759  1.00  0.00
ATOM   2754  CG  LEU   345      45.277  54.210  58.103  1.00  0.00
ATOM   2755  CD1 LEU   345      44.979  54.289  59.669  1.00  0.00
ATOM   2756  CD2 LEU   345      43.868  54.130  57.445  1.00  0.00
ATOM   2757  C   LEU   345      45.936  55.129  55.229  1.00  0.00
ATOM   2758  O   LEU   345      45.699  54.053  54.613  1.00  0.00
ATOM   2759  N   LEU   346      45.237  56.306  54.985  1.00  0.00
ATOM   2760  CA  LEU   346      44.378  56.432  53.832  1.00  0.00
ATOM   2761  CB  LEU   346      43.814  57.926  53.776  1.00  0.00
ATOM   2762  CG  LEU   346      43.126  58.590  54.968  1.00  0.00
ATOM   2763  CD1 LEU   346      42.444  59.956  54.637  1.00  0.00
ATOM   2764  CD2 LEU   346      42.043  57.625  55.477  1.00  0.00
ATOM   2765  C   LEU   346      45.032  56.043  52.479  1.00  0.00
ATOM   2766  O   LEU   346      44.414  55.361  51.679  1.00  0.00
ATOM   2767  N   LEU   347      46.336  56.388  52.298  1.00  0.00
ATOM   2768  CA  LEU   347      47.137  55.980  51.100  1.00  0.00
ATOM   2769  CB  LEU   347      48.363  56.838  51.100  1.00  0.00
ATOM   2770  CG  LEU   347      48.078  58.332  51.039  1.00  0.00
ATOM   2771  CD1 LEU   347      49.329  59.196  51.128  1.00  0.00
ATOM   2772  CD2 LEU   347      47.573  58.708  49.612  1.00  0.00
ATOM   2773  C   LEU   347      47.563  54.481  51.034  1.00  0.00
ATOM   2774  O   LEU   347      47.396  53.919  49.975  1.00  0.00
ATOM   2775  N   ARG   348      47.943  53.852  52.089  1.00  0.00
ATOM   2776  CA  ARG   348      48.191  52.397  52.256  1.00  0.00
ATOM   2777  CB  ARG   348      48.666  52.158  53.741  1.00  0.00
ATOM   2778  CG  ARG   348      50.162  52.530  53.924  1.00  0.00
ATOM   2779  CD  ARG   348      50.682  51.992  55.280  1.00  0.00
ATOM   2780  NE  ARG   348      50.088  52.655  56.404  1.00  0.00
ATOM   2781  CZ  ARG   348      50.536  53.681  57.013  1.00  0.00
ATOM   2782  NH1 ARG   348      50.054  54.061  58.129  1.00  0.00
ATOM   2783  NH2 ARG   348      51.595  54.308  56.706  1.00  0.00
ATOM   2784  C   ARG   348      46.902  51.701  51.911  1.00  0.00
ATOM   2785  O   ARG   348      46.871  50.703  51.171  1.00  0.00
ATOM   2786  N   LEU   349      45.731  52.158  52.449  1.00  0.00
ATOM   2787  CA  LEU   349      44.419  51.624  52.108  1.00  0.00
ATOM   2788  CB  LEU   349      43.556  52.275  53.168  1.00  0.00
ATOM   2789  CG  LEU   349      42.135  51.712  53.412  1.00  0.00
ATOM   2790  CD1 LEU   349      41.524  52.077  54.748  1.00  0.00
ATOM   2791  CD2 LEU   349      41.197  52.096  52.257  1.00  0.00
ATOM   2792  C   LEU   349      43.907  51.768  50.679  1.00  0.00
ATOM   2793  O   LEU   349      43.489  50.824  50.011  1.00  0.00
ATOM   2794  N   ALA   350      44.036  52.968  50.122  1.00  0.00
ATOM   2795  CA  ALA   350      43.780  53.232  48.670  1.00  0.00
ATOM   2796  CB  ALA   350      43.813  54.791  48.627  1.00  0.00
ATOM   2797  C   ALA   350      44.818  52.551  47.708  1.00  0.00
ATOM   2798  O   ALA   350      44.488  52.102  46.623  1.00  0.00
ATOM   2799  N   LYS   351      46.105  52.323  48.139  1.00  0.00
ATOM   2800  CA  LYS   351      47.101  51.571  47.365  1.00  0.00
ATOM   2801  CB  LYS   351      48.508  51.829  47.824  1.00  0.00
ATOM   2802  CG  LYS   351      49.626  50.890  47.218  1.00  0.00
ATOM   2803  CD  LYS   351      49.792  51.035  45.691  1.00  0.00
ATOM   2804  CE  LYS   351      50.968  50.108  45.260  1.00  0.00
ATOM   2805  NZ  LYS   351      51.221  50.140  43.776  1.00  0.00
ATOM   2806  C   LYS   351      46.704  50.059  47.356  1.00  0.00
ATOM   2807  O   LYS   351      46.847  49.453  46.295  1.00  0.00
ATOM   2808  N   THR   352      46.123  49.575  48.467  1.00  0.00
ATOM   2809  CA  THR   352      45.625  48.191  48.471  1.00  0.00
ATOM   2810  CB  THR   352      45.293  47.723  49.860  1.00  0.00
ATOM   2811  CG2 THR   352      44.893  46.201  50.014  1.00  0.00
ATOM   2812  OG1 THR   352      46.268  48.050  50.772  1.00  0.00
ATOM   2813  C   THR   352      44.412  48.022  47.559  1.00  0.00
ATOM   2814  O   THR   352      44.359  47.108  46.744  1.00  0.00
ATOM   2815  N   TYR   353      43.559  49.004  47.541  1.00  0.00
ATOM   2816  CA  TYR   353      42.429  49.113  46.587  1.00  0.00
ATOM   2817  CB  TYR   353      41.381  50.147  46.992  1.00  0.00
ATOM   2818  CG  TYR   353      40.194  50.221  46.115  1.00  0.00
ATOM   2819  CD1 TYR   353      39.967  51.397  45.320  1.00  0.00
ATOM   2820  CE1 TYR   353      38.763  51.588  44.537  1.00  0.00
ATOM   2821  CZ  TYR   353      37.858  50.483  44.471  1.00  0.00
ATOM   2822  OH  TYR   353      36.736  50.551  43.788  1.00  0.00
ATOM   2823  CE2 TYR   353      38.207  49.256  45.101  1.00  0.00
ATOM   2824  CD2 TYR   353      39.309  49.161  45.976  1.00  0.00
ATOM   2825  C   TYR   353      42.818  49.268  45.113  1.00  0.00
ATOM   2826  O   TYR   353      42.275  48.527  44.246  1.00  0.00
ATOM   2827  N   GLU   354      43.905  50.042  44.836  1.00  0.00
ATOM   2828  CA  GLU   354      44.517  50.111  43.568  1.00  0.00
ATOM   2829  CB  GLU   354      45.511  51.238  43.677  1.00  0.00
ATOM   2830  CG  GLU   354      46.373  51.368  42.462  1.00  0.00
ATOM   2831  CD  GLU   354      47.443  52.443  42.531  1.00  0.00
ATOM   2832  OE1 GLU   354      47.309  53.447  43.311  1.00  0.00
ATOM   2833  OE2 GLU   354      48.430  52.443  41.706  1.00  0.00
ATOM   2834  C   GLU   354      45.104  48.745  43.065  1.00  0.00
ATOM   2835  O   GLU   354      44.791  48.213  42.053  1.00  0.00
ATOM   2836  N   THR   355      45.950  48.135  43.901  1.00  0.00
ATOM   2837  CA  THR   355      46.608  46.809  43.600  1.00  0.00
ATOM   2838  CB  THR   355      47.568  46.386  44.675  1.00  0.00
ATOM   2839  CG2 THR   355      48.419  45.112  44.523  1.00  0.00
ATOM   2840  OG1 THR   355      48.565  47.399  44.809  1.00  0.00
ATOM   2841  C   THR   355      45.505  45.766  43.357  1.00  0.00
ATOM   2842  O   THR   355      45.644  44.968  42.482  1.00  0.00
ATOM   2843  N   THR   356      44.419  45.776  44.082  1.00  0.00
ATOM   2844  CA  THR   356      43.231  44.882  43.820  1.00  0.00
ATOM   2845  CB  THR   356      42.054  45.204  44.797  1.00  0.00
ATOM   2846  CG2 THR   356      41.011  44.105  44.575  1.00  0.00
ATOM   2847  OG1 THR   356      42.386  45.156  46.194  1.00  0.00
ATOM   2848  C   THR   356      42.712  45.099  42.429  1.00  0.00
ATOM   2849  O   THR   356      42.382  44.135  41.694  1.00  0.00
ATOM   2850  N   LEU   357      42.590  46.316  41.952  1.00  0.00
ATOM   2851  CA  LEU   357      42.005  46.691  40.670  1.00  0.00
ATOM   2852  CB  LEU   357      41.454  48.081  40.787  1.00  0.00
ATOM   2853  CG  LEU   357      40.259  48.136  41.691  1.00  0.00
ATOM   2854  CD1 LEU   357      39.872  49.599  41.797  1.00  0.00
ATOM   2855  CD2 LEU   357      39.054  47.295  41.204  1.00  0.00
ATOM   2856  C   LEU   357      42.944  46.347  39.509  1.00  0.00
ATOM   2857  O   LEU   357      42.467  45.838  38.464  1.00  0.00
ATOM   2858  N   GLU   358      44.260  46.491  39.669  1.00  0.00
ATOM   2859  CA  GLU   358      45.309  45.953  38.827  1.00  0.00
ATOM   2860  CB  GLU   358      46.638  46.366  39.420  1.00  0.00
ATOM   2861  CG  GLU   358      47.896  45.730  38.755  1.00  0.00
ATOM   2862  CD  GLU   358      49.223  46.292  39.306  1.00  0.00
ATOM   2863  OE1 GLU   358      49.983  46.958  38.555  1.00  0.00
ATOM   2864  OE2 GLU   358      49.598  46.079  40.530  1.00  0.00
ATOM   2865  C   GLU   358      45.211  44.420  38.652  1.00  0.00
ATOM   2866  O   GLU   358      45.584  43.891  37.601  1.00  0.00
ATOM   2867  N   LYS   359      44.700  43.639  39.599  1.00  0.00
ATOM   2868  CA  LYS   359      44.478  42.161  39.446  1.00  0.00
ATOM   2869  CB  LYS   359      44.599  41.419  40.785  1.00  0.00
ATOM   2870  CG  LYS   359      44.324  39.920  40.754  1.00  0.00
ATOM   2871  CD  LYS   359      44.751  39.206  42.074  1.00  0.00
ATOM   2872  CE  LYS   359      43.786  38.023  42.195  1.00  0.00
ATOM   2873  NZ  LYS   359      44.044  37.238  43.389  1.00  0.00
ATOM   2874  C   LYS   359      43.092  41.733  38.881  1.00  0.00
ATOM   2875  O   LYS   359      42.996  40.869  38.039  1.00  0.00
ATOM   2876  N   CYX   360      42.093  42.442  39.435  1.00  0.00
ATOM   2877  CA  CYX   360      40.676  42.214  39.189  1.00  0.00
ATOM   2878  CB  CYX   360      39.905  42.564  40.433  1.00  0.00
ATOM   2879  SG  CYX   360      40.231  41.628  41.912  1.00  0.00
ATOM   2880  C   CYX   360      40.148  42.659  37.868  1.00  0.00
ATOM   2881  O   CYX   360      39.390  41.951  37.149  1.00  0.00
ATOM   2882  N   CYX   361      40.570  43.873  37.418  1.00  0.00
ATOM   2883  CA  CYX   361      40.053  44.339  36.172  1.00  0.00
ATOM   2884  CB  CYX   361      40.145  45.826  35.871  1.00  0.00
ATOM   2885  SG  CYX   361      39.502  46.876  37.149  1.00  0.00
ATOM   2886  C   CYX   361      40.658  43.665  34.919  1.00  0.00
ATOM   2887  O   CYX   361      40.170  43.829  33.824  1.00  0.00
ATOM   2888  N   ALA   362      41.675  42.794  35.111  1.00  0.00
ATOM   2889  CA  ALA   362      42.262  42.037  33.990  1.00  0.00
ATOM   2890  CB  ALA   362      43.713  41.723  34.322  1.00  0.00
ATOM   2891  C   ALA   362      41.504  40.710  33.791  1.00  0.00
ATOM   2892  O   ALA   362      41.828  39.904  32.957  1.00  0.00
ATOM   2893  N   ALA   363      40.564  40.405  34.683  1.00  0.00
ATOM   2894  CA  ALA   363      39.793  39.166  34.673  1.00  0.00
ATOM   2895  CB  ALA   363      39.111  38.860  36.055  1.00  0.00
ATOM   2896  C   ALA   363      38.739  39.257  33.589  1.00  0.00
ATOM   2897  O   ALA   363      38.206  40.309  33.237  1.00  0.00
ATOM   2898  N   ALA   364      38.322  38.103  33.095  1.00  0.00
ATOM   2899  CA  ALA   364      37.150  38.024  32.166  1.00  0.00
ATOM   2900  CB  ALA   364      37.230  36.710  31.415  1.00  0.00
ATOM   2901  C   ALA   364      35.785  38.195  32.828  1.00  0.00
ATOM   2902  O   ALA   364      34.706  38.310  32.188  1.00  0.00
ATOM   2903  N   ASP   365      35.739  38.301  34.187  1.00  0.00
ATOM   2904  CA  ASP   365      34.560  38.673  34.965  1.00  0.00
ATOM   2905  CB  ASP   365      33.579  37.462  35.170  1.00  0.00
ATOM   2906  CG  ASP   365      34.288  36.225  35.853  1.00  0.00
ATOM   2907  OD1 ASP   365      35.530  36.029  35.684  1.00  0.00
ATOM   2908  OD2 ASP   365      33.698  35.387  36.551  1.00  0.00
ATOM   2909  C   ASP   365      34.966  39.370  36.318  1.00  0.00
ATOM   2910  O   ASP   365      35.116  38.692  37.337  1.00  0.00
ATOM   2911  N   PRO   366      35.221  40.705  36.344  1.00  0.00
ATOM   2912  CD  PRO   366      35.367  41.514  35.160  1.00  0.00
ATOM   2913  CG  PRO   366      36.515  42.465  35.427  1.00  0.00
ATOM   2914  CB  PRO   366      36.226  42.775  36.924  1.00  0.00
ATOM   2915  CA  PRO   366      35.940  41.416  37.451  1.00  0.00
ATOM   2916  C   PRO   366      35.108  41.447  38.779  1.00  0.00
ATOM   2917  O   PRO   366      35.640  41.544  39.861  1.00  0.00
ATOM   2918  N   HID   367      33.799  41.312  38.681  1.00  0.00
ATOM   2919  CA  HID   367      32.860  41.963  39.579  1.00  0.00
ATOM   2920  CB  HID   367      31.358  41.967  39.176  1.00  0.00
ATOM   2921  CG  HID   367      31.032  42.584  37.776  1.00  0.00
ATOM   2922  ND1 HID   367      30.512  41.917  36.753  1.00  0.00
ATOM   2923  CE1 HID   367      30.299  42.775  35.751  1.00  0.00
ATOM   2924  NE2 HID   367      30.673  44.012  36.197  1.00  0.00
ATOM   2925  CD2 HID   367      31.133  43.902  37.485  1.00  0.00
ATOM   2926  C   HID   367      32.998  41.529  41.112  1.00  0.00
ATOM   2927  O   HID   367      33.262  42.340  42.006  1.00  0.00
ATOM   2928  N   GLU   368      32.986  40.227  41.375  1.00  0.00
ATOM   2929  CA  GLU   368      33.257  39.601  42.619  1.00  0.00
ATOM   2930  CB  GLU   368      32.744  38.187  42.526  1.00  0.00
ATOM   2931  CG  GLU   368      33.568  37.247  41.655  1.00  0.00
ATOM   2932  CD  GLU   368      32.820  35.914  41.624  1.00  0.00
ATOM   2933  OE1 GLU   368      33.000  35.143  42.649  1.00  0.00
ATOM   2934  OE2 GLU   368      32.049  35.691  40.693  1.00  0.00
ATOM   2935  C   GLU   368      34.726  39.676  43.153  1.00  0.00
ATOM   2936  O   GLU   368      34.840  39.456  44.344  1.00  0.00
ATOM   2937  N   CYX   369      35.726  40.045  42.395  1.00  0.00
ATOM   2938  CA  CYX   369      37.191  39.843  42.711  1.00  0.00
ATOM   2939  CB  CYX   369      38.000  39.766  41.357  1.00  0.00
ATOM   2940  SG  CYX   369      39.813  39.729  41.419  1.00  0.00
ATOM   2941  C   CYX   369      37.673  40.963  43.641  1.00  0.00
ATOM   2942  O   CYX   369      38.437  40.685  44.548  1.00  0.00
ATOM   2943  N   TYR   370      37.051  42.142  43.504  1.00  0.00
ATOM   2944  CA  TYR   370      37.155  43.414  44.273  1.00  0.00
ATOM   2945  CB  TYR   370      37.275  44.654  43.322  1.00  0.00
ATOM   2946  CG  TYR   370      36.163  44.951  42.403  1.00  0.00
ATOM   2947  CD1 TYR   370      35.081  45.611  43.014  1.00  0.00
ATOM   2948  CE1 TYR   370      33.962  46.015  42.229  1.00  0.00
ATOM   2949  CZ  TYR   370      33.972  45.770  40.854  1.00  0.00
ATOM   2950  OH  TYR   370      32.940  46.016  40.020  1.00  0.00
ATOM   2951  CE2 TYR   370      35.089  45.105  40.238  1.00  0.00
ATOM   2952  CD2 TYR   370      36.249  44.718  41.028  1.00  0.00
ATOM   2953  C   TYR   370      36.047  43.511  45.344  1.00  0.00
ATOM   2954  O   TYR   370      35.926  44.608  45.841  1.00  0.00
ATOM   2955  N   ALA   371      35.236  42.481  45.537  1.00  0.00
ATOM   2956  CA  ALA   371      34.072  42.575  46.453  1.00  0.00
ATOM   2957  CB  ALA   371      32.953  41.730  45.908  1.00  0.00
ATOM   2958  C   ALA   371      34.325  42.384  47.966  1.00  0.00
ATOM   2959  O   ALA   371      33.549  42.839  48.810  1.00  0.00
ATOM   2960  N   LYS   372      35.497  41.782  48.336  1.00  0.00
ATOM   2961  CA  LYS   372      35.845  41.453  49.760  1.00  0.00
ATOM   2962  CB  LYS   372      36.186  39.923  49.698  1.00  0.00
ATOM   2963  CG  LYS   372      34.999  38.970  49.657  1.00  0.00
ATOM   2964  CD  LYS   372      35.341  37.453  49.654  1.00  0.00
ATOM   2965  CE  LYS   372      34.079  36.663  49.825  1.00  0.00
ATOM   2966  NZ  LYS   372      33.183  36.684  48.664  1.00  0.00
ATOM   2967  C   LYS   372      36.903  42.370  50.385  1.00  0.00
ATOM   2968  O   LYS   372      37.496  42.129  51.404  1.00  0.00
ATOM   2969  N   VAL   373      37.197  43.458  49.695  1.00  0.00
ATOM   2970  CA  VAL   373      38.323  44.322  49.903  1.00  0.00
ATOM   2971  CB  VAL   373      38.467  45.194  48.672  1.00  0.00
ATOM   2972  CG1 VAL   373      37.398  46.267  48.647  1.00  0.00
ATOM   2973  CG2 VAL   373      39.924  45.743  48.536  1.00  0.00
ATOM   2974  C   VAL   373      38.436  45.125  51.291  1.00  0.00
ATOM   2975  O   VAL   373      39.550  45.297  51.706  1.00  0.00
ATOM   2976  N   PHE   374      37.333  45.239  52.106  1.00  0.00
ATOM   2977  CA  PHE   374      37.337  45.628  53.492  1.00  0.00
ATOM   2978  CB  PHE   374      35.914  45.803  54.051  1.00  0.00
ATOM   2979  CG  PHE   374      35.310  47.263  53.889  1.00  0.00
ATOM   2980  CD1 PHE   374      35.519  48.213  54.888  1.00  0.00
ATOM   2981  CE1 PHE   374      34.996  49.539  54.783  1.00  0.00
ATOM   2982  CZ  PHE   374      34.314  49.905  53.623  1.00  0.00
ATOM   2983  CE2 PHE   374      34.013  48.949  52.632  1.00  0.00
ATOM   2984  CD2 PHE   374      34.569  47.663  52.743  1.00  0.00
ATOM   2985  C   PHE   374      38.234  44.763  54.369  1.00  0.00
ATOM   2986  O   PHE   374      38.883  45.221  55.228  1.00  0.00
ATOM   2987  N   ASP   375      38.219  43.433  54.126  1.00  0.00
ATOM   2988  CA  ASP   375      38.957  42.473  54.973  1.00  0.00
ATOM   2989  CB  ASP   375      38.685  41.035  54.500  1.00  0.00
ATOM   2990  CG  ASP   375      39.222  40.010  55.516  1.00  0.00
ATOM   2991  OD1 ASP   375      39.977  39.136  55.056  1.00  0.00
ATOM   2992  OD2 ASP   375      38.956  40.137  56.752  1.00  0.00
ATOM   2993  C   ASP   375      40.464  42.759  54.962  1.00  0.00
ATOM   2994  O   ASP   375      41.203  42.397  55.869  1.00  0.00
ATOM   2995  N   GLU   376      40.976  43.365  53.882  1.00  0.00
ATOM   2996  CA  GLU   376      42.242  44.077  53.774  1.00  0.00
ATOM   2997  CB  GLU   376      42.712  44.056  52.354  1.00  0.00
ATOM   2998  CG  GLU   376      42.841  42.779  51.587  1.00  0.00
ATOM   2999  CD  GLU   376      43.779  41.809  52.400  1.00  0.00
ATOM   3000  OE1 GLU   376      44.836  41.458  51.846  1.00  0.00
ATOM   3001  OE2 GLU   376      43.431  41.303  53.476  1.00  0.00
ATOM   3002  C   GLU   376      42.367  45.520  54.351  1.00  0.00
ATOM   3003  O   GLU   376      43.470  45.926  54.585  1.00  0.00
ATOM   3004  N   PHE   377      41.290  46.308  54.510  1.00  0.00
ATOM   3005  CA  PHE   377      41.294  47.635  55.158  1.00  0.00
ATOM   3006  CB  PHE   377      40.117  48.395  54.630  1.00  0.00
ATOM   3007  CG  PHE   377      39.981  48.548  53.151  1.00  0.00
ATOM   3008  CD1 PHE   377      41.083  48.650  52.306  1.00  0.00
ATOM   3009  CE1 PHE   377      40.886  48.717  50.896  1.00  0.00
ATOM   3010  CZ  PHE   377      39.546  48.809  50.322  1.00  0.00
ATOM   3011  CE2 PHE   377      38.455  48.765  51.173  1.00  0.00
ATOM   3012  CD2 PHE   377      38.662  48.721  52.578  1.00  0.00
ATOM   3013  C   PHE   377      41.350  47.302  56.633  1.00  0.00
ATOM   3014  O   PHE   377      41.896  48.127  57.292  1.00  0.00
ATOM   3015  N   LYS   378      40.845  46.180  57.170  1.00  0.00
ATOM   3016  CA  LYS   378      40.736  45.745  58.566  1.00  0.00
ATOM   3017  CB  LYS   378      40.087  44.374  58.581  1.00  0.00
ATOM   3018  CG  LYS   378      39.868  43.765  60.011  1.00  0.00
ATOM   3019  CD  LYS   378      39.518  42.271  59.855  1.00  0.00
ATOM   3020  CE  LYS   378      38.048  42.266  59.320  1.00  0.00
ATOM   3021  NZ  LYS   378      37.587  40.888  59.098  1.00  0.00
ATOM   3022  C   LYS   378      41.960  45.991  59.466  1.00  0.00
ATOM   3023  O   LYS   378      41.809  46.574  60.565  1.00  0.00
ATOM   3024  N   PRO   379      43.151  45.585  59.063  1.00  0.00
ATOM   3025  CD  PRO   379      43.414  44.787  57.882  1.00  0.00
ATOM   3026  CG  PRO   379      44.944  44.638  57.703  1.00  0.00
ATOM   3027  CB  PRO   379      45.470  44.862  59.154  1.00  0.00
ATOM   3028  CA  PRO   379      44.428  45.816  59.735  1.00  0.00
ATOM   3029  C   PRO   379      44.976  47.239  59.621  1.00  0.00
ATOM   3030  O   PRO   379      45.462  47.782  60.605  1.00  0.00
ATOM   3031  N   LEU   380      44.837  47.902  58.486  1.00  0.00
ATOM   3032  CA  LEU   380      45.311  49.309  58.286  1.00  0.00
ATOM   3033  CB  LEU   380      45.078  49.842  56.808  1.00  0.00
ATOM   3034  CG  LEU   380      46.112  49.184  55.853  1.00  0.00
ATOM   3035  CD1 LEU   380      45.759  49.594  54.472  1.00  0.00
ATOM   3036  CD2 LEU   380      47.570  49.798  56.058  1.00  0.00
ATOM   3037  C   LEU   380      44.652  50.311  59.348  1.00  0.00
ATOM   3038  O   LEU   380      45.376  51.014  60.050  1.00  0.00
ATOM   3039  N   VAL   381      43.343  50.222  59.563  1.00  0.00
ATOM   3040  CA  VAL   381      42.511  51.146  60.382  1.00  0.00
ATOM   3041  CB  VAL   381      41.050  51.094  59.912  1.00  0.00
ATOM   3042  CG1 VAL   381      40.902  51.677  58.554  1.00  0.00
ATOM   3043  CG2 VAL   381      40.441  49.673  59.992  1.00  0.00
ATOM   3044  C   VAL   381      42.640  50.875  61.854  1.00  0.00
ATOM   3045  O   VAL   381      42.136  51.698  62.666  1.00  0.00
ATOM   3046  N   GLU   382      43.191  49.755  62.280  1.00  0.00
ATOM   3047  CA  GLU   382      43.442  49.380  63.637  1.00  0.00
ATOM   3048  CB  GLU   382      43.146  47.914  63.946  1.00  0.00
ATOM   3049  CG  GLU   382      42.934  47.592  65.403  1.00  0.00
ATOM   3050  CD  GLU   382      42.232  46.225  65.664  1.00  0.00
ATOM   3051  OE1 GLU   382      41.109  45.990  65.141  1.00  0.00
ATOM   3052  OE2 GLU   382      42.878  45.369  66.266  1.00  0.00
ATOM   3053  C   GLU   382      44.943  49.727  63.994  1.00  0.00
ATOM   3054  O   GLU   382      45.367  49.568  65.135  1.00  0.00
ATOM   3055  N   GLU   383      45.776  50.250  63.041  1.00  0.00
ATOM   3056  CA  GLU   383      47.106  50.737  63.422  1.00  0.00
ATOM   3057  CB  GLU   383      47.952  51.038  62.165  1.00  0.00
ATOM   3058  CG  GLU   383      49.380  51.351  62.647  1.00  0.00
ATOM   3059  CD  GLU   383      50.149  51.343  61.380  1.00  0.00
ATOM   3060  OE1 GLU   383      49.959  52.040  60.362  1.00  0.00
ATOM   3061  OE2 GLU   383      51.031  50.460  61.207  1.00  0.00
ATOM   3062  C   GLU   383      47.001  51.914  64.380  1.00  0.00
ATOM   3063  O   GLU   383      47.848  52.001  65.309  1.00  0.00
ATOM   3064  N   PRO   384      45.960  52.780  64.299  1.00  0.00
ATOM   3065  CD  PRO   384      45.004  52.979  63.284  1.00  0.00
ATOM   3066  CG  PRO   384      44.279  54.375  63.512  1.00  0.00
ATOM   3067  CB  PRO   384      44.395  54.650  65.021  1.00  0.00
ATOM   3068  CA  PRO   384      45.654  53.770  65.341  1.00  0.00
ATOM   3069  C   PRO   384      45.646  53.190  66.786  1.00  0.00
ATOM   3070  O   PRO   384      46.078  53.844  67.724  1.00  0.00
ATOM   3071  N   GLN   385      45.240  51.928  66.945  1.00  0.00
ATOM   3072  CA  GLN   385      45.195  51.214  68.200  1.00  0.00
ATOM   3073  CB  GLN   385      43.889  50.403  68.369  1.00  0.00
ATOM   3074  CG  GLN   385      42.578  50.995  67.746  1.00  0.00
ATOM   3075  CD  GLN   385      41.298  50.236  67.963  1.00  0.00
ATOM   3076  OE1 GLN   385      41.108  49.381  68.738  1.00  0.00
ATOM   3077  NE2 GLN   385      40.340  50.553  67.213  1.00  0.00
ATOM   3078  C   GLN   385      46.335  50.242  68.408  1.00  0.00
ATOM   3079  O   GLN   385      46.297  49.540  69.474  1.00  0.00
ATOM   3080  N   ASN   386      47.334  50.198  67.549  1.00  0.00
ATOM   3081  CA  ASN   386      48.482  49.332  67.686  1.00  0.00
ATOM   3082  CB  ASN   386      48.573  48.370  66.542  1.00  0.00
ATOM   3083  CG  ASN   386      47.642  47.122  66.716  1.00  0.00
ATOM   3084  OD1 ASN   386      48.122  45.997  67.082  1.00  0.00
ATOM   3085  ND2 ASN   386      46.359  47.215  66.543  1.00  0.00
ATOM   3086  C   ASN   386      49.755  50.117  67.936  1.00  0.00
ATOM   3087  O   ASN   386      50.336  50.112  69.063  1.00  0.00
ATOM   3088  N   LEU   387      50.142  50.936  66.988  1.00  0.00
ATOM   3089  CA  LEU   387      51.441  51.620  66.846  1.00  0.00
ATOM   3090  CB  LEU   387      51.437  52.191  65.463  1.00  0.00
ATOM   3091  CG  LEU   387      52.541  53.257  65.006  1.00  0.00
ATOM   3092  CD1 LEU   387      53.893  52.612  65.176  1.00  0.00
ATOM   3093  CD2 LEU   387      52.319  53.737  63.589  1.00  0.00
ATOM   3094  C   LEU   387      51.615  52.676  67.980  1.00  0.00
ATOM   3095  O   LEU   387      52.752  52.869  68.390  1.00  0.00
ATOM   3096  N   ILE   388      50.509  53.253  68.474  1.00  0.00
ATOM   3097  CA  ILE   388      50.590  54.249  69.568  1.00  0.00
ATOM   3098  CB  ILE   388      49.280  55.156  69.604  1.00  0.00
ATOM   3099  CG2 ILE   388      49.353  56.221  70.647  1.00  0.00
ATOM   3100  CG1 ILE   388      49.049  55.709  68.143  1.00  0.00
ATOM   3101  CD1 ILE   388      50.226  56.537  67.613  1.00  0.00
ATOM   3102  C   ILE   388      50.896  53.536  70.932  1.00  0.00
ATOM   3103  O   ILE   388      51.883  53.822  71.557  1.00  0.00
ATOM   3104  N   LYS   389      50.003  52.676  71.471  1.00  0.00
ATOM   3105  CA  LYS   389      50.130  52.103  72.806  1.00  0.00
ATOM   3106  CB  LYS   389      48.979  51.099  73.020  1.00  0.00
ATOM   3107  CG  LYS   389      48.713  49.943  72.036  1.00  0.00
ATOM   3108  CD  LYS   389      47.486  49.104  72.476  1.00  0.00
ATOM   3109  CE  LYS   389      46.107  49.793  72.619  1.00  0.00
ATOM   3110  NZ  LYS   389      45.102  48.938  72.017  1.00  0.00
ATOM   3111  C   LYS   389      51.458  51.422  72.995  1.00  0.00
ATOM   3112  O   LYS   389      52.093  51.757  73.975  1.00  0.00
ATOM   3113  N   GLN   390      52.003  50.713  71.977  1.00  0.00
ATOM   3114  CA  GLN   390      53.360  50.066  71.912  1.00  0.00
ATOM   3115  CB  GLN   390      53.551  49.446  70.501  1.00  0.00
ATOM   3116  CG  GLN   390      52.621  48.196  70.366  1.00  0.00
ATOM   3117  CD  GLN   390      52.774  47.553  68.922  1.00  0.00
ATOM   3118  OE1 GLN   390      53.618  47.777  68.037  1.00  0.00
ATOM   3119  NE2 GLN   390      51.841  46.763  68.471  1.00  0.00
ATOM   3120  C   GLN   390      54.514  51.054  72.152  1.00  0.00
ATOM   3121  O   GLN   390      55.557  50.758  72.769  1.00  0.00
ATOM   3122  N   ASN   391      54.336  52.313  71.839  1.00  0.00
ATOM   3123  CA  ASN   391      55.250  53.463  72.128  1.00  0.00
ATOM   3124  CB  ASN   391      55.219  54.450  70.961  1.00  0.00
ATOM   3125  CG  ASN   391      56.061  53.956  69.836  1.00  0.00
ATOM   3126  OD1 ASN   391      57.239  53.723  69.881  1.00  0.00
ATOM   3127  ND2 ASN   391      55.372  53.480  68.805  1.00  0.00
ATOM   3128  C   ASN   391      54.893  54.092  73.436  1.00  0.00
ATOM   3129  O   ASN   391      55.813  54.361  74.271  1.00  0.00
ATOM   3130  N   CYX   392      53.571  54.316  73.641  1.00  0.00
ATOM   3131  CA  CYX   392      53.149  55.026  74.844  1.00  0.00
ATOM   3132  CB  CYX   392      51.635  55.360  74.815  1.00  0.00
ATOM   3133  SG  CYX   392      51.195  56.523  73.473  1.00  0.00
ATOM   3134  C   CYX   392      53.630  54.424  76.129  1.00  0.00
ATOM   3135  O   CYX   392      54.063  54.983  77.073  1.00  0.00
ATOM   3136  N   GLU   393      53.653  53.077  76.091  1.00  0.00
ATOM   3137  CA  GLU   393      54.017  52.178  77.192  1.00  0.00
ATOM   3138  CB  GLU   393      54.006  50.770  76.616  1.00  0.00
ATOM   3139  CG  GLU   393      54.353  49.596  77.527  1.00  0.00
ATOM   3140  CD  GLU   393      54.050  48.194  77.004  1.00  0.00
ATOM   3141  OE1 GLU   393      55.017  47.443  76.997  1.00  0.00
ATOM   3142  OE2 GLU   393      52.924  47.794  76.671  1.00  0.00
ATOM   3143  C   GLU   393      55.383  52.483  77.766  1.00  0.00
ATOM   3144  O   GLU   393      55.577  52.721  78.951  1.00  0.00
ATOM   3145  N   LEU   394      56.349  52.579  76.896  1.00  0.00
ATOM   3146  CA  LEU   394      57.765  52.793  77.280  1.00  0.00
ATOM   3147  CB  LEU   394      58.677  52.509  76.066  1.00  0.00
ATOM   3148  CG  LEU   394      58.969  51.043  75.683  1.00  0.00
ATOM   3149  CD1 LEU   394      60.055  50.941  74.639  1.00  0.00
ATOM   3150  CD2 LEU   394      59.400  50.174  76.885  1.00  0.00
ATOM   3151  C   LEU   394      57.807  54.223  77.838  1.00  0.00
ATOM   3152  O   LEU   394      58.438  54.480  78.849  1.00  0.00
ATOM   3153  N   PHE   395      57.154  55.206  77.215  1.00  0.00
ATOM   3154  CA  PHE   395      57.157  56.601  77.589  1.00  0.00
ATOM   3155  CB  PHE   395      56.695  57.505  76.358  1.00  0.00
ATOM   3156  CG  PHE   395      56.450  58.927  76.723  1.00  0.00
ATOM   3157  CD1 PHE   395      57.573  59.580  77.232  1.00  0.00
ATOM   3158  CE1 PHE   395      57.380  60.902  77.609  1.00  0.00
ATOM   3159  CZ  PHE   395      56.141  61.565  77.494  1.00  0.00
ATOM   3160  CE2 PHE   395      54.968  60.783  77.233  1.00  0.00
ATOM   3161  CD2 PHE   395      55.128  59.449  76.811  1.00  0.00
ATOM   3162  C   PHE   395      56.457  56.917  78.887  1.00  0.00
ATOM   3163  O   PHE   395      56.967  57.623  79.718  1.00  0.00
ATOM   3164  N   GLU   396      55.334  56.356  79.071  1.00  0.00
ATOM   3165  CA  GLU   396      54.541  56.391  80.335  1.00  0.00
ATOM   3166  CB  GLU   396      53.105  55.876  80.070  1.00  0.00
ATOM   3167  CG  GLU   396      52.260  56.663  79.098  1.00  0.00
ATOM   3168  CD  GLU   396      51.613  57.847  79.900  1.00  0.00
ATOM   3169  OE1 GLU   396      50.675  57.523  80.708  1.00  0.00
ATOM   3170  OE2 GLU   396      52.062  59.035  79.904  1.00  0.00
ATOM   3171  C   GLU   396      55.141  55.588  81.516  1.00  0.00
ATOM   3172  O   GLU   396      54.616  55.523  82.610  1.00  0.00
ATOM   3173  N   GLN   397      56.325  55.110  81.285  1.00  0.00
ATOM   3174  CA  GLN   397      57.171  54.446  82.252  1.00  0.00
ATOM   3175  CB  GLN   397      57.242  52.946  81.919  1.00  0.00
ATOM   3176  CG  GLN   397      55.826  52.234  82.065  1.00  0.00
ATOM   3177  CD  GLN   397      55.805  50.682  81.808  1.00  0.00
ATOM   3178  OE1 GLN   397      55.439  49.917  82.687  1.00  0.00
ATOM   3179  NE2 GLN   397      56.041  50.182  80.570  1.00  0.00
ATOM   3180  C   GLN   397      58.534  55.007  82.549  1.00  0.00
ATOM   3181  O   GLN   397      58.989  54.977  83.753  1.00  0.00
ATOM   3182  N   LEU   398      59.246  55.581  81.519  1.00  0.00
ATOM   3183  CA  LEU   398      60.597  56.058  81.484  1.00  0.00
ATOM   3184  CB  LEU   398      61.188  55.673  80.132  1.00  0.00
ATOM   3185  CG  LEU   398      61.551  54.174  79.981  1.00  0.00
ATOM   3186  CD1 LEU   398      62.248  53.976  78.639  1.00  0.00
ATOM   3187  CD2 LEU   398      62.480  53.552  81.088  1.00  0.00
ATOM   3188  C   LEU   398      60.749  57.577  81.578  1.00  0.00
ATOM   3189  O   LEU   398      61.751  58.045  82.092  1.00  0.00
ATOM   3190  N   GLY   399      59.754  58.364  81.135  1.00  0.00
ATOM   3191  CA  GLY   399      60.078  59.766  80.821  1.00  0.00
ATOM   3192  C   GLY   399      60.973  59.986  79.585  1.00  0.00
ATOM   3193  O   GLY   399      61.633  59.111  79.056  1.00  0.00
ATOM   3194  N   GLU   400      60.934  61.250  79.077  1.00  0.00
ATOM   3195  CA  GLU   400      61.390  61.725  77.760  1.00  0.00
ATOM   3196  CB  GLU   400      61.097  63.258  77.550  1.00  0.00
ATOM   3197  CG  GLU   400      61.404  63.688  76.128  1.00  0.00
ATOM   3198  CD  GLU   400      61.075  65.161  75.940  1.00  0.00
ATOM   3199  OE1 GLU   400      60.289  65.457  74.980  1.00  0.00
ATOM   3200  OE2 GLU   400      61.639  65.992  76.712  1.00  0.00
ATOM   3201  C   GLU   400      62.841  61.211  77.481  1.00  0.00
ATOM   3202  O   GLU   400      63.105  60.558  76.492  1.00  0.00
ATOM   3203  N   TYR   401      63.757  61.614  78.347  1.00  0.00
ATOM   3204  CA  TYR   401      65.208  61.421  78.134  1.00  0.00
ATOM   3205  CB  TYR   401      65.910  62.052  79.329  1.00  0.00
ATOM   3206  CG  TYR   401      67.360  61.696  79.517  1.00  0.00
ATOM   3207  CD1 TYR   401      67.675  60.776  80.620  1.00  0.00
ATOM   3208  CE1 TYR   401      68.932  60.144  80.623  1.00  0.00
ATOM   3209  CZ  TYR   401      69.904  60.313  79.614  1.00  0.00
ATOM   3210  OH  TYR   401      71.046  59.599  79.619  1.00  0.00
ATOM   3211  CE2 TYR   401      69.558  61.140  78.545  1.00  0.00
ATOM   3212  CD2 TYR   401      68.322  61.840  78.472  1.00  0.00
ATOM   3213  C   TYR   401      65.416  59.884  78.032  1.00  0.00
ATOM   3214  O   TYR   401      66.099  59.456  77.135  1.00  0.00
ATOM   3215  N   LYS   402      64.730  59.006  78.744  1.00  0.00
ATOM   3216  CA  LYS   402      65.009  57.557  78.801  1.00  0.00
ATOM   3217  CB  LYS   402      64.593  57.046  80.140  1.00  0.00
ATOM   3218  CG  LYS   402      65.664  57.355  81.247  1.00  0.00
ATOM   3219  CD  LYS   402      65.412  56.670  82.591  1.00  0.00
ATOM   3220  CE  LYS   402      66.596  56.889  83.520  1.00  0.00
ATOM   3221  NZ  LYS   402      66.373  56.074  84.714  1.00  0.00
ATOM   3222  C   LYS   402      64.351  56.953  77.559  1.00  0.00
ATOM   3223  O   LYS   402      65.052  56.090  77.035  1.00  0.00
ATOM   3224  N   PHE   403      63.112  57.292  77.187  1.00  0.00
ATOM   3225  CA  PHE   403      62.457  57.026  75.833  1.00  0.00
ATOM   3226  CB  PHE   403      61.067  57.585  75.977  1.00  0.00
ATOM   3227  CG  PHE   403      60.100  57.200  74.828  1.00  0.00
ATOM   3228  CD1 PHE   403      59.856  58.192  73.844  1.00  0.00
ATOM   3229  CE1 PHE   403      59.128  57.870  72.707  1.00  0.00
ATOM   3230  CZ  PHE   403      58.674  56.554  72.513  1.00  0.00
ATOM   3231  CE2 PHE   403      59.000  55.569  73.430  1.00  0.00
ATOM   3232  CD2 PHE   403      59.666  55.879  74.579  1.00  0.00
ATOM   3233  C   PHE   403      63.241  57.548  74.605  1.00  0.00
ATOM   3234  O   PHE   403      63.316  56.838  73.615  1.00  0.00
ATOM   3235  N   GLN   404      63.914  58.691  74.634  1.00  0.00
ATOM   3236  CA  GLN   404      64.850  59.015  73.679  1.00  0.00
ATOM   3237  CB  GLN   404      65.372  60.420  73.740  1.00  0.00
ATOM   3238  CG  GLN   404      64.311  61.451  73.376  1.00  0.00
ATOM   3239  CD  GLN   404      64.768  62.779  73.935  1.00  0.00
ATOM   3240  OE1 GLN   404      65.579  62.934  74.814  1.00  0.00
ATOM   3241  NE2 GLN   404      64.169  63.852  73.445  1.00  0.00
ATOM   3242  C   GLN   404      65.979  58.008  73.524  1.00  0.00
ATOM   3243  O   GLN   404      66.372  57.543  72.469  1.00  0.00
ATOM   3244  N   ASN   405      66.585  57.580  74.676  1.00  0.00
ATOM   3245  CA  ASN   405      67.715  56.620  74.666  1.00  0.00
ATOM   3246  CB  ASN   405      68.446  56.544  76.018  1.00  0.00
ATOM   3247  CG  ASN   405      68.954  57.772  76.559  1.00  0.00
ATOM   3248  OD1 ASN   405      69.051  58.886  75.980  1.00  0.00
ATOM   3249  ND2 ASN   405      69.531  57.655  77.753  1.00  0.00
ATOM   3250  C   ASN   405      67.279  55.167  74.329  1.00  0.00
ATOM   3251  O   ASN   405      68.015  54.492  73.646  1.00  0.00
ATOM   3252  N   ALA   406      66.013  54.711  74.582  1.00  0.00
ATOM   3253  CA  ALA   406      65.460  53.488  73.979  1.00  0.00
ATOM   3254  CB  ALA   406      64.132  53.289  74.672  1.00  0.00
ATOM   3255  C   ALA   406      65.348  53.696  72.462  1.00  0.00
ATOM   3256  O   ALA   406      65.624  52.694  71.744  1.00  0.00
ATOM   3257  N   LEU   407      64.929  54.864  71.986  1.00  0.00
ATOM   3258  CA  LEU   407      64.751  55.121  70.562  1.00  0.00
ATOM   3259  CB  LEU   407      63.982  56.526  70.299  1.00  0.00
ATOM   3260  CG  LEU   407      62.460  56.348  70.293  1.00  0.00
ATOM   3261  CD1 LEU   407      61.769  57.680  70.342  1.00  0.00
ATOM   3262  CD2 LEU   407      62.035  55.641  69.031  1.00  0.00
ATOM   3263  C   LEU   407      66.057  55.056  69.758  1.00  0.00
ATOM   3264  O   LEU   407      66.109  54.401  68.658  1.00  0.00
ATOM   3265  N   LEU   408      67.099  55.638  70.382  1.00  0.00
ATOM   3266  CA  LEU   408      68.430  55.828  69.863  1.00  0.00
ATOM   3267  CB  LEU   408      69.165  56.779  70.774  1.00  0.00
ATOM   3268  CG  LEU   408      70.710  57.016  70.825  1.00  0.00
ATOM   3269  CD1 LEU   408      70.951  58.104  71.902  1.00  0.00
ATOM   3270  CD2 LEU   408      71.484  55.686  71.186  1.00  0.00
ATOM   3271  C   LEU   408      69.163  54.520  69.717  1.00  0.00
ATOM   3272  O   LEU   408      69.841  54.340  68.717  1.00  0.00
ATOM   3273  N   VAL   409      68.921  53.525  70.622  1.00  0.00
ATOM   3274  CA  VAL   409      69.474  52.176  70.445  1.00  0.00
ATOM   3275  CB  VAL   409      69.201  51.243  71.661  1.00  0.00
ATOM   3276  CG1 VAL   409      69.737  49.846  71.495  1.00  0.00
ATOM   3277  CG2 VAL   409      69.798  51.781  73.008  1.00  0.00
ATOM   3278  C   VAL   409      68.914  51.521  69.123  1.00  0.00
ATOM   3279  O   VAL   409      69.776  51.075  68.339  1.00  0.00
ATOM   3280  N   ARG   410      67.601  51.679  68.836  1.00  0.00
ATOM   3281  CA  ARG   410      66.964  51.183  67.555  1.00  0.00
ATOM   3282  CB  ARG   410      65.392  51.108  67.663  1.00  0.00
ATOM   3283  CG  ARG   410      64.832  50.486  68.966  1.00  0.00
ATOM   3284  CD  ARG   410      63.295  50.236  68.975  1.00  0.00
ATOM   3285  NE  ARG   410      62.922  49.154  68.060  1.00  0.00
ATOM   3286  CZ  ARG   410      61.770  48.499  68.107  1.00  0.00
ATOM   3287  NH1 ARG   410      61.697  47.444  67.311  1.00  0.00
ATOM   3288  NH2 ARG   410      60.720  49.013  68.659  1.00  0.00
ATOM   3289  C   ARG   410      67.381  51.935  66.296  1.00  0.00
ATOM   3290  O   ARG   410      67.865  51.350  65.312  1.00  0.00
ATOM   3291  N   TYR   411      67.404  53.240  66.401  1.00  0.00
ATOM   3292  CA  TYR   411      67.721  54.143  65.270  1.00  0.00
ATOM   3293  CB  TYR   411      67.279  55.533  65.735  1.00  0.00
ATOM   3294  CG  TYR   411      67.556  56.658  64.816  1.00  0.00
ATOM   3295  CD1 TYR   411      67.649  58.002  65.296  1.00  0.00
ATOM   3296  CE1 TYR   411      67.905  59.081  64.428  1.00  0.00
ATOM   3297  CZ  TYR   411      67.997  58.847  63.056  1.00  0.00
ATOM   3298  OH  TYR   411      68.489  59.744  62.181  1.00  0.00
ATOM   3299  CE2 TYR   411      67.754  57.552  62.531  1.00  0.00
ATOM   3300  CD2 TYR   411      67.520  56.477  63.430  1.00  0.00
ATOM   3301  C   TYR   411      69.236  54.108  64.857  1.00  0.00
ATOM   3302  O   TYR   411      69.527  53.993  63.708  1.00  0.00
ATOM   3303  N   THR   412      70.165  54.136  65.880  1.00  0.00
ATOM   3304  CA  THR   412      71.620  53.812  65.694  1.00  0.00
ATOM   3305  CB  THR   412      72.473  53.838  66.977  1.00  0.00
ATOM   3306  CG2 THR   412      73.981  53.737  66.767  1.00  0.00
ATOM   3307  OG1 THR   412      72.182  54.960  67.682  1.00  0.00
ATOM   3308  C   THR   412      71.792  52.392  65.150  1.00  0.00
ATOM   3309  O   THR   412      72.762  52.222  64.439  1.00  0.00
ATOM   3310  N   LYS   413      70.915  51.406  65.438  1.00  0.00
ATOM   3311  CA  LYS   413      71.053  50.026  64.804  1.00  0.00
ATOM   3312  CB  LYS   413      70.329  48.964  65.690  1.00  0.00
ATOM   3313  CG  LYS   413      71.357  48.647  66.871  1.00  0.00
ATOM   3314  CD  LYS   413      70.788  47.741  67.978  1.00  0.00
ATOM   3315  CE  LYS   413      70.259  46.429  67.420  1.00  0.00
ATOM   3316  NZ  LYS   413      69.830  45.551  68.548  1.00  0.00
ATOM   3317  C   LYS   413      70.539  50.001  63.347  1.00  0.00
ATOM   3318  O   LYS   413      71.174  49.327  62.522  1.00  0.00
ATOM   3319  N   LYN   414      69.362  50.612  63.034  1.00  0.00
ATOM   3320  CA  LYN   414      68.768  50.646  61.709  1.00  0.00
ATOM   3321  CB  LYN   414      67.376  51.204  61.756  1.00  0.00
ATOM   3322  CG  LYN   414      66.501  50.183  62.484  1.00  0.00
ATOM   3323  CD  LYN   414      65.069  50.446  62.850  1.00  0.00
ATOM   3324  CE  LYN   414      65.095  51.381  64.082  1.00  0.00
ATOM   3325  NZ  LYN   414      63.805  51.594  64.648  1.00  0.00
ATOM   3326  C   LYN   414      69.702  51.387  60.714  1.00  0.00
ATOM   3327  O   LYN   414      69.942  50.929  59.565  1.00  0.00
ATOM   3328  N   VAL   415      70.354  52.466  61.160  1.00  0.00
ATOM   3329  CA  VAL   415      71.227  53.303  60.312  1.00  0.00
ATOM   3330  CB  VAL   415      70.457  54.571  59.752  1.00  0.00
ATOM   3331  CG1 VAL   415      69.749  54.109  58.389  1.00  0.00
ATOM   3332  CG2 VAL   415      69.593  55.228  60.749  1.00  0.00
ATOM   3333  C   VAL   415      72.538  53.793  61.006  1.00  0.00
ATOM   3334  O   VAL   415      72.667  54.978  61.186  1.00  0.00
ATOM   3335  N   PRO   416      73.505  52.943  61.370  1.00  0.00
ATOM   3336  CD  PRO   416      73.556  51.525  61.198  1.00  0.00
ATOM   3337  CG  PRO   416      74.978  51.033  61.585  1.00  0.00
ATOM   3338  CB  PRO   416      75.430  52.035  62.681  1.00  0.00
ATOM   3339  CA  PRO   416      74.689  53.280  62.216  1.00  0.00
ATOM   3340  C   PRO   416      75.668  54.147  61.374  1.00  0.00
ATOM   3341  O   PRO   416      76.501  54.808  61.886  1.00  0.00
ATOM   3342  N   GLN   417      75.475  54.135  60.024  1.00  0.00
ATOM   3343  CA  GLN   417      76.228  54.834  59.005  1.00  0.00
ATOM   3344  CB  GLN   417      76.293  54.120  57.653  1.00  0.00
ATOM   3345  CG  GLN   417      74.997  54.292  56.770  1.00  0.00
ATOM   3346  CD  GLN   417      73.951  53.221  57.057  1.00  0.00
ATOM   3347  OE1 GLN   417      73.694  52.891  58.215  1.00  0.00
ATOM   3348  NE2 GLN   417      73.257  52.721  56.074  1.00  0.00
ATOM   3349  C   GLN   417      75.880  56.338  58.853  1.00  0.00
ATOM   3350  O   GLN   417      76.445  56.990  58.008  1.00  0.00
ATOM   3351  N   VAL   418      75.170  56.952  59.825  1.00  0.00
ATOM   3352  CA  VAL   418      74.804  58.416  59.899  1.00  0.00
ATOM   3353  CB  VAL   418      73.357  58.622  60.254  1.00  0.00
ATOM   3354  CG1 VAL   418      72.952  60.067  60.419  1.00  0.00
ATOM   3355  CG2 VAL   418      72.480  58.011  59.102  1.00  0.00
ATOM   3356  C   VAL   418      75.764  59.082  60.926  1.00  0.00
ATOM   3357  O   VAL   418      76.087  58.468  61.912  1.00  0.00
ATOM   3358  N   SER   419      76.193  60.370  60.776  1.00  0.00
ATOM   3359  CA  SER   419      76.880  61.178  61.781  1.00  0.00
ATOM   3360  CB  SER   419      77.051  62.600  61.194  1.00  0.00
ATOM   3361  OG  SER   419      77.568  63.457  62.196  1.00  0.00
ATOM   3362  C   SER   419      76.206  61.247  63.068  1.00  0.00
ATOM   3363  O   SER   419      74.993  61.376  63.180  1.00  0.00
ATOM   3364  N   THR   420      76.925  60.972  64.169  1.00  0.00
ATOM   3365  CA  THR   420      76.502  60.820  65.570  1.00  0.00
ATOM   3366  CB  THR   420      77.676  60.420  66.366  1.00  0.00
ATOM   3367  CG2 THR   420      77.462  60.442  67.822  1.00  0.00
ATOM   3368  OG1 THR   420      78.099  59.141  66.073  1.00  0.00
ATOM   3369  C   THR   420      75.671  61.954  66.231  1.00  0.00
ATOM   3370  O   THR   420      74.626  61.643  66.816  1.00  0.00
ATOM   3371  N   PRO   421      76.099  63.218  66.057  1.00  0.00
ATOM   3372  CD  PRO   421      77.442  63.700  65.760  1.00  0.00
ATOM   3373  CG  PRO   421      77.531  65.184  66.090  1.00  0.00
ATOM   3374  CB  PRO   421      76.108  65.571  65.954  1.00  0.00
ATOM   3375  CA  PRO   421      75.310  64.341  66.432  1.00  0.00
ATOM   3376  C   PRO   421      73.983  64.280  65.747  1.00  0.00
ATOM   3377  O   PRO   421      73.038  64.570  66.480  1.00  0.00
ATOM   3378  N   THR   422      73.861  64.029  64.464  1.00  0.00
ATOM   3379  CA  THR   422      72.603  63.991  63.724  1.00  0.00
ATOM   3380  CB  THR   422      72.867  63.728  62.204  1.00  0.00
ATOM   3381  CG2 THR   422      71.651  63.903  61.312  1.00  0.00
ATOM   3382  OG1 THR   422      73.793  64.669  61.742  1.00  0.00
ATOM   3383  C   THR   422      71.666  62.880  64.159  1.00  0.00
ATOM   3384  O   THR   422      70.436  62.970  64.194  1.00  0.00
ATOM   3385  N   LEU   423      72.207  61.706  64.394  1.00  0.00
ATOM   3386  CA  LEU   423      71.534  60.611  65.123  1.00  0.00
ATOM   3387  CB  LEU   423      72.421  59.370  65.356  1.00  0.00
ATOM   3388  CG  LEU   423      72.722  58.394  64.146  1.00  0.00
ATOM   3389  CD1 LEU   423      73.824  57.369  64.525  1.00  0.00
ATOM   3390  CD2 LEU   423      71.406  57.650  63.673  1.00  0.00
ATOM   3391  C   LEU   423      70.950  61.165  66.437  1.00  0.00
ATOM   3392  O   LEU   423      69.745  61.112  66.596  1.00  0.00
ATOM   3393  N   VAL   424      71.677  61.805  67.305  1.00  0.00
ATOM   3394  CA  VAL   424      71.170  62.403  68.563  1.00  0.00
ATOM   3395  CB  VAL   424      72.326  62.719  69.580  1.00  0.00
ATOM   3396  CG1 VAL   424      71.912  63.337  70.923  1.00  0.00
ATOM   3397  CG2 VAL   424      72.982  61.365  69.870  1.00  0.00
ATOM   3398  C   VAL   424      70.156  63.532  68.316  1.00  0.00
ATOM   3399  O   VAL   424      69.122  63.647  69.011  1.00  0.00
ATOM   3400  N   GLU   425      70.391  64.484  67.311  1.00  0.00
ATOM   3401  CA  GLU   425      69.428  65.548  66.927  1.00  0.00
ATOM   3402  CB  GLU   425      70.012  66.256  65.707  1.00  0.00
ATOM   3403  CG  GLU   425      69.093  67.470  65.376  1.00  0.00
ATOM   3404  CD  GLU   425      69.941  68.291  64.381  1.00  0.00
ATOM   3405  OE1 GLU   425      71.099  68.678  64.704  1.00  0.00
ATOM   3406  OE2 GLU   425      69.450  68.592  63.252  1.00  0.00
ATOM   3407  C   GLU   425      68.072  64.931  66.634  1.00  0.00
ATOM   3408  O   GLU   425      67.008  65.376  67.058  1.00  0.00
ATOM   3409  N   VAL   426      68.165  63.849  65.931  1.00  0.00
ATOM   3410  CA  VAL   426      66.927  63.210  65.434  1.00  0.00
ATOM   3411  CB  VAL   426      67.105  62.752  63.975  1.00  0.00
ATOM   3412  CG1 VAL   426      65.888  62.099  63.352  1.00  0.00
ATOM   3413  CG2 VAL   426      67.360  63.909  63.030  1.00  0.00
ATOM   3414  C   VAL   426      66.255  62.199  66.411  1.00  0.00
ATOM   3415  O   VAL   426      65.051  62.045  66.508  1.00  0.00
ATOM   3416  N   SER   427      67.133  61.677  67.284  1.00  0.00
ATOM   3417  CA  SER   427      66.733  60.746  68.360  1.00  0.00
ATOM   3418  CB  SER   427      67.928  60.073  69.076  1.00  0.00
ATOM   3419  OG  SER   427      68.736  59.315  68.268  1.00  0.00
ATOM   3420  C   SER   427      66.014  61.496  69.493  1.00  0.00
ATOM   3421  O   SER   427      65.045  60.947  70.060  1.00  0.00
ATOM   3422  N   ARG   428      66.341  62.757  69.686  1.00  0.00
ATOM   3423  CA  ARG   428      65.558  63.707  70.508  1.00  0.00
ATOM   3424  CB  ARG   428      66.519  64.892  70.905  1.00  0.00
ATOM   3425  CG  ARG   428      67.652  64.488  71.867  1.00  0.00
ATOM   3426  CD  ARG   428      68.685  65.689  71.998  1.00  0.00
ATOM   3427  NE  ARG   428      68.368  66.830  72.887  1.00  0.00
ATOM   3428  CZ  ARG   428      68.166  68.094  72.650  1.00  0.00
ATOM   3429  NH1 ARG   428      68.014  68.963  73.608  1.00  0.00
ATOM   3430  NH2 ARG   428      68.325  68.621  71.481  1.00  0.00
ATOM   3431  C   ARG   428      64.157  64.187  69.882  1.00  0.00
ATOM   3432  O   ARG   428      63.112  64.185  70.495  1.00  0.00
ATOM   3433  N   ASN   429      64.234  64.386  68.569  1.00  0.00
ATOM   3434  CA  ASN   429      63.028  64.695  67.730  1.00  0.00
ATOM   3435  CB  ASN   429      63.576  65.122  66.288  1.00  0.00
ATOM   3436  CG  ASN   429      62.421  65.700  65.424  1.00  0.00
ATOM   3437  OD1 ASN   429      61.786  65.025  64.585  1.00  0.00
ATOM   3438  ND2 ASN   429      61.956  66.869  65.604  1.00  0.00
ATOM   3439  C   ASN   429      61.957  63.551  67.723  1.00  0.00
ATOM   3440  O   ASN   429      60.767  63.781  68.153  1.00  0.00
ATOM   3441  N   LEU   430      62.314  62.402  67.288  1.00  0.00
ATOM   3442  CA  LEU   430      61.609  61.073  67.395  1.00  0.00
ATOM   3443  CB  LEU   430      62.559  59.898  67.022  1.00  0.00
ATOM   3444  CG  LEU   430      62.849  59.743  65.545  1.00  0.00
ATOM   3445  CD1 LEU   430      64.139  58.956  65.314  1.00  0.00
ATOM   3446  CD2 LEU   430      61.811  58.882  64.880  1.00  0.00
ATOM   3447  C   LEU   430      61.025  60.770  68.805  1.00  0.00
ATOM   3448  O   LEU   430      60.112  59.965  68.874  1.00  0.00
ATOM   3449  N   GLY   431      61.538  61.341  69.883  1.00  0.00
ATOM   3450  CA  GLY   431      60.877  61.151  71.230  1.00  0.00
ATOM   3451  C   GLY   431      59.479  61.764  71.320  1.00  0.00
ATOM   3452  O   GLY   431      58.701  61.351  72.188  1.00  0.00
ATOM   3453  N   LYS   432      59.177  62.699  70.421  1.00  0.00
ATOM   3454  CA  LYS   432      57.799  63.198  70.436  1.00  0.00
ATOM   3455  CB  LYS   432      57.747  64.633  69.736  1.00  0.00
ATOM   3456  CG  LYS   432      57.986  65.808  70.672  1.00  0.00
ATOM   3457  CD  LYS   432      59.410  65.997  71.108  1.00  0.00
ATOM   3458  CE  LYS   432      60.288  66.480  70.035  1.00  0.00
ATOM   3459  NZ  LYS   432      61.672  66.703  70.486  1.00  0.00
ATOM   3460  C   LYS   432      56.662  62.221  70.037  1.00  0.00
ATOM   3461  O   LYS   432      55.544  62.441  70.414  1.00  0.00
ATOM   3462  N   VAL   433      57.000  61.127  69.389  1.00  0.00
ATOM   3463  CA  VAL   433      56.102  59.897  69.289  1.00  0.00
ATOM   3464  CB  VAL   433      56.749  58.709  68.557  1.00  0.00
ATOM   3465  CG1 VAL   433      55.792  57.489  68.254  1.00  0.00
ATOM   3466  CG2 VAL   433      57.185  59.122  67.074  1.00  0.00
ATOM   3467  C   VAL   433      55.572  59.466  70.691  1.00  0.00
ATOM   3468  O   VAL   433      54.342  59.250  70.881  1.00  0.00
ATOM   3469  N   GLY   434      56.353  59.476  71.751  1.00  0.00
ATOM   3470  CA  GLY   434      56.017  59.555  73.214  1.00  0.00
ATOM   3471  C   GLY   434      55.519  61.032  73.581  1.00  0.00
ATOM   3472  O   GLY   434      54.354  61.301  73.578  1.00  0.00
ATOM   3473  N   SER   435      56.419  61.994  73.820  1.00  0.00
ATOM   3474  CA  SER   435      56.106  63.274  74.551  1.00  0.00
ATOM   3475  CB  SER   435      57.505  63.800  75.032  1.00  0.00
ATOM   3476  OG  SER   435      58.288  64.178  73.904  1.00  0.00
ATOM   3477  C   SER   435      55.425  64.374  73.774  1.00  0.00
ATOM   3478  O   SER   435      55.437  65.546  74.216  1.00  0.00
ATOM   3479  N   LYS   436      54.807  64.085  72.662  1.00  0.00
ATOM   3480  CA  LYS   436      53.826  65.061  72.096  1.00  0.00
ATOM   3481  CB  LYS   436      54.294  65.730  70.860  1.00  0.00
ATOM   3482  CG  LYS   436      53.161  66.669  70.491  1.00  0.00
ATOM   3483  CD  LYS   436      53.444  67.990  69.852  1.00  0.00
ATOM   3484  CE  LYS   436      54.205  67.905  68.529  1.00  0.00
ATOM   3485  NZ  LYS   436      54.522  69.224  67.804  1.00  0.00
ATOM   3486  C   LYS   436      52.544  64.132  71.832  1.00  0.00
ATOM   3487  O   LYS   436      51.505  64.383  72.375  1.00  0.00
ATOM   3488  N   CYX   437      52.746  63.098  71.018  1.00  0.00
ATOM   3489  CA  CYX   437      51.701  62.282  70.429  1.00  0.00
ATOM   3490  CB  CYX   437      52.316  61.521  69.261  1.00  0.00
ATOM   3491  SG  CYX   437      53.372  62.337  68.022  1.00  0.00
ATOM   3492  C   CYX   437      50.943  61.319  71.377  1.00  0.00
ATOM   3493  O   CYX   437      49.744  61.172  71.262  1.00  0.00
ATOM   3494  N   CYX   438      51.583  60.786  72.442  1.00  0.00
ATOM   3495  CA  CYX   438      50.905  60.153  73.599  1.00  0.00
ATOM   3496  CB  CYX   438      51.880  59.343  74.392  1.00  0.00
ATOM   3497  SG  CYX   438      52.617  57.936  73.517  1.00  0.00
ATOM   3498  C   CYX   438      50.247  61.281  74.419  1.00  0.00
ATOM   3499  O   CYX   438      49.121  61.018  74.796  1.00  0.00
ATOM   3500  N   LYS   439      50.762  62.459  74.564  1.00  0.00
ATOM   3501  CA  LYS   439      50.033  63.460  75.353  1.00  0.00
ATOM   3502  CB  LYS   439      51.109  64.474  75.808  1.00  0.00
ATOM   3503  CG  LYS   439      50.756  65.465  76.909  1.00  0.00
ATOM   3504  CD  LYS   439      51.903  66.407  77.218  1.00  0.00
ATOM   3505  CE  LYS   439      51.402  67.449  78.294  1.00  0.00
ATOM   3506  NZ  LYS   439      50.504  68.466  77.700  1.00  0.00
ATOM   3507  C   LYS   439      48.789  64.020  74.584  1.00  0.00
ATOM   3508  O   LYS   439      47.934  64.619  75.246  1.00  0.00
ATOM   3509  N   HIE   440      48.640  63.751  73.290  1.00  0.00
ATOM   3510  CA  HIE   440      47.483  64.390  72.502  1.00  0.00
ATOM   3511  CB  HIE   440      47.991  64.431  70.970  1.00  0.00
ATOM   3512  CG  HIE   440      48.686  65.687  70.553  1.00  0.00
ATOM   3513  ND1 HIE   440      48.301  66.931  70.947  1.00  0.00
ATOM   3514  CE1 HIE   440      49.033  67.854  70.252  1.00  0.00
ATOM   3515  NE2 HIE   440      49.877  67.212  69.458  1.00  0.00
ATOM   3516  CD2 HIE   440      49.688  65.814  69.623  1.00  0.00
ATOM   3517  C   HIE   440      46.119  63.717  72.700  1.00  0.00
ATOM   3518  O   HIE   440      46.017  62.564  72.970  1.00  0.00
ATOM   3519  N   PRO   441      45.080  64.448  72.411  1.00  0.00
ATOM   3520  CD  PRO   441      45.042  65.785  71.875  1.00  0.00
ATOM   3521  CG  PRO   441      43.827  65.813  70.944  1.00  0.00
ATOM   3522  CB  PRO   441      42.842  65.038  71.864  1.00  0.00
ATOM   3523  CA  PRO   441      43.743  63.843  72.277  1.00  0.00
ATOM   3524  C   PRO   441      43.637  62.841  71.190  1.00  0.00
ATOM   3525  O   PRO   441      44.311  62.921  70.125  1.00  0.00
ATOM   3526  N   GLU   442      42.704  61.922  71.367  1.00  0.00
ATOM   3527  CA  GLU   442      42.607  60.668  70.517  1.00  0.00
ATOM   3528  CB  GLU   442      41.270  59.896  70.902  1.00  0.00
ATOM   3529  CG  GLU   442      41.182  58.554  70.208  1.00  0.00
ATOM   3530  CD  GLU   442      40.334  57.578  71.019  1.00  0.00
ATOM   3531  OE1 GLU   442      39.356  57.037  70.504  1.00  0.00
ATOM   3532  OE2 GLU   442      40.700  57.129  72.141  1.00  0.00
ATOM   3533  C   GLU   442      42.615  60.970  69.015  1.00  0.00
ATOM   3534  O   GLU   442      43.250  60.250  68.251  1.00  0.00
ATOM   3535  N   ALA   443      41.943  61.980  68.560  1.00  0.00
ATOM   3536  CA  ALA   443      41.806  62.280  67.159  1.00  0.00
ATOM   3537  CB  ALA   443      40.666  63.279  66.970  1.00  0.00
ATOM   3538  C   ALA   443      43.118  62.948  66.563  1.00  0.00
ATOM   3539  O   ALA   443      43.044  63.270  65.359  1.00  0.00
ATOM   3540  N   LYS   444      44.269  63.156  67.210  1.00  0.00
ATOM   3541  CA  LYS   444      45.610  63.582  66.700  1.00  0.00
ATOM   3542  CB  LYS   444      45.858  64.919  67.446  1.00  0.00
ATOM   3543  CG  LYS   444      44.809  66.033  67.154  1.00  0.00
ATOM   3544  CD  LYS   444      45.255  67.424  67.480  1.00  0.00
ATOM   3545  CE  LYS   444      44.176  68.571  67.272  1.00  0.00
ATOM   3546  NZ  LYS   444      44.682  69.837  67.922  1.00  0.00
ATOM   3547  C   LYS   444      46.795  62.682  66.884  1.00  0.00
ATOM   3548  O   LYS   444      47.827  62.961  66.288  1.00  0.00
ATOM   3549  N   ARG   445      46.606  61.527  67.563  1.00  0.00
ATOM   3550  CA  ARG   445      47.720  60.670  67.995  1.00  0.00
ATOM   3551  CB  ARG   445      47.170  59.546  68.997  1.00  0.00
ATOM   3552  CG  ARG   445      46.721  60.138  70.329  1.00  0.00
ATOM   3553  CD  ARG   445      46.351  59.028  71.334  1.00  0.00
ATOM   3554  NE  ARG   445      46.176  59.640  72.701  1.00  0.00
ATOM   3555  CZ  ARG   445      45.833  59.100  73.764  1.00  0.00
ATOM   3556  NH1 ARG   445      45.828  59.763  74.888  1.00  0.00
ATOM   3557  NH2 ARG   445      45.513  57.826  73.790  1.00  0.00
ATOM   3558  C   ARG   445      48.402  60.063  66.834  1.00  0.00
ATOM   3559  O   ARG   445      49.629  60.239  66.578  1.00  0.00
ATOM   3560  N   MET   446      47.612  59.382  65.993  1.00  0.00
ATOM   3561  CA  MET   446      48.030  58.614  64.764  1.00  0.00
ATOM   3562  CB  MET   446      46.968  57.636  64.263  1.00  0.00
ATOM   3563  CG  MET   446      47.288  56.918  62.945  1.00  0.00
ATOM   3564  SD  MET   446      48.168  55.377  63.231  1.00  0.00
ATOM   3565  CE  MET   446      48.474  54.908  61.498  1.00  0.00
ATOM   3566  C   MET   446      48.651  59.559  63.722  1.00  0.00
ATOM   3567  O   MET   446      49.750  59.329  63.240  1.00  0.00
ATOM   3568  N   PRO   447      47.988  60.681  63.369  1.00  0.00
ATOM   3569  CD  PRO   447      46.512  60.856  63.282  1.00  0.00
ATOM   3570  CG  PRO   447      46.325  62.122  62.574  1.00  0.00
ATOM   3571  CB  PRO   447      47.656  62.834  62.593  1.00  0.00
ATOM   3572  CA  PRO   447      48.608  61.748  62.593  1.00  0.00
ATOM   3573  C   PRO   447      50.051  62.216  63.033  1.00  0.00
ATOM   3574  O   PRO   447      50.887  62.328  62.171  1.00  0.00
ATOM   3575  N   CYX   448      50.194  62.664  64.286  1.00  0.00
ATOM   3576  CA  CYX   448      51.475  63.075  64.931  1.00  0.00
ATOM   3577  CB  CYX   448      51.151  63.498  66.414  1.00  0.00
ATOM   3578  SG  CYX   448      52.484  64.024  67.510  1.00  0.00
ATOM   3579  C   CYX   448      52.563  61.995  64.941  1.00  0.00
ATOM   3580  O   CYX   448      53.748  62.294  64.685  1.00  0.00
ATOM   3581  N   ALA   449      52.244  60.723  65.255  1.00  0.00
ATOM   3582  CA  ALA   449      53.271  59.685  65.252  1.00  0.00
ATOM   3583  CB  ALA   449      52.707  58.447  65.940  1.00  0.00
ATOM   3584  C   ALA   449      53.842  59.324  63.901  1.00  0.00
ATOM   3585  O   ALA   449      55.015  58.898  63.839  1.00  0.00
ATOM   3586  N   GLU   450      53.017  59.352  62.815  1.00  0.00
ATOM   3587  CA  GLU   450      53.600  59.179  61.473  1.00  0.00
ATOM   3588  CB  GLU   450      52.503  58.672  60.518  1.00  0.00
ATOM   3589  CG  GLU   450      52.004  57.257  61.009  1.00  0.00
ATOM   3590  CD  GLU   450      51.378  56.415  59.881  1.00  0.00
ATOM   3591  OE1 GLU   450      50.245  56.585  59.496  1.00  0.00
ATOM   3592  OE2 GLU   450      52.100  55.524  59.359  1.00  0.00
ATOM   3593  C   GLU   450      54.255  60.434  60.911  1.00  0.00
ATOM   3594  O   GLU   450      55.231  60.380  60.094  1.00  0.00
ATOM   3595  N   ASP   451      53.829  61.667  61.328  1.00  0.00
ATOM   3596  CA  ASP   451      54.512  62.968  60.945  1.00  0.00
ATOM   3597  CB  ASP   451      53.549  64.107  61.236  1.00  0.00
ATOM   3598  CG  ASP   451      54.176  65.422  60.816  1.00  0.00
ATOM   3599  OD1 ASP   451      54.383  65.636  59.604  1.00  0.00
ATOM   3600  OD2 ASP   451      54.595  66.233  61.645  1.00  0.00
ATOM   3601  C   ASP   451      55.846  63.053  61.758  1.00  0.00
ATOM   3602  O   ASP   451      56.694  63.819  61.394  1.00  0.00
ATOM   3603  N   TYR   452      56.053  62.225  62.764  1.00  0.00
ATOM   3604  CA  TYR   452      57.341  62.057  63.470  1.00  0.00
ATOM   3605  CB  TYR   452      57.253  62.178  65.051  1.00  0.00
ATOM   3606  CG  TYR   452      57.229  63.563  65.568  1.00  0.00
ATOM   3607  CD1 TYR   452      56.088  64.123  66.138  1.00  0.00
ATOM   3608  CE1 TYR   452      56.011  65.376  66.747  1.00  0.00
ATOM   3609  CZ  TYR   452      57.198  66.119  66.855  1.00  0.00
ATOM   3610  OH  TYR   452      57.153  67.372  67.344  1.00  0.00
ATOM   3611  CE2 TYR   452      58.417  65.583  66.369  1.00  0.00
ATOM   3612  CD2 TYR   452      58.395  64.260  65.842  1.00  0.00
ATOM   3613  C   TYR   452      58.222  60.884  62.990  1.00  0.00
ATOM   3614  O   TYR   452      59.410  60.948  63.357  1.00  0.00
ATOM   3615  N   LEU   453      57.794  59.926  62.176  1.00  0.00
ATOM   3616  CA  LEU   453      58.693  58.862  61.697  1.00  0.00
ATOM   3617  CB  LEU   453      57.899  57.570  61.673  1.00  0.00
ATOM   3618  CG  LEU   453      57.768  56.954  63.120  1.00  0.00
ATOM   3619  CD1 LEU   453      56.811  55.762  63.026  1.00  0.00
ATOM   3620  CD2 LEU   453      59.049  56.524  63.699  1.00  0.00
ATOM   3621  C   LEU   453      59.198  59.240  60.280  1.00  0.00
ATOM   3622  O   LEU   453      60.326  58.860  59.941  1.00  0.00
ATOM   3623  N   SER   454      58.505  60.163  59.546  1.00  0.00
ATOM   3624  CA  SER   454      58.830  60.604  58.201  1.00  0.00
ATOM   3625  CB  SER   454      57.974  61.843  57.710  1.00  0.00
ATOM   3626  OG  SER   454      56.617  61.658  57.657  1.00  0.00
ATOM   3627  C   SER   454      60.303  60.890  58.066  1.00  0.00
ATOM   3628  O   SER   454      60.952  60.478  57.152  1.00  0.00
ATOM   3629  N   VAL   455      60.950  61.535  59.018  1.00  0.00
ATOM   3630  CA  VAL   455      62.383  61.886  58.974  1.00  0.00
ATOM   3631  CB  VAL   455      62.796  62.675  60.275  1.00  0.00
ATOM   3632  CG1 VAL   455      62.576  61.860  61.564  1.00  0.00
ATOM   3633  CG2 VAL   455      64.224  63.225  60.089  1.00  0.00
ATOM   3634  C   VAL   455      63.349  60.750  58.614  1.00  0.00
ATOM   3635  O   VAL   455      64.344  60.913  57.867  1.00  0.00
ATOM   3636  N   VAL   456      63.093  59.531  59.144  1.00  0.00
ATOM   3637  CA  VAL   456      63.874  58.298  58.884  1.00  0.00
ATOM   3638  CB  VAL   456      64.006  57.347  60.090  1.00  0.00
ATOM   3639  CG1 VAL   456      64.711  57.929  61.299  1.00  0.00
ATOM   3640  CG2 VAL   456      62.731  56.531  60.460  1.00  0.00
ATOM   3641  C   VAL   456      63.507  57.555  57.581  1.00  0.00
ATOM   3642  O   VAL   456      64.330  56.805  56.984  1.00  0.00
ATOM   3643  N   LEU   457      62.272  57.728  57.127  1.00  0.00
ATOM   3644  CA  LEU   457      61.668  57.110  55.925  1.00  0.00
ATOM   3645  CB  LEU   457      60.154  56.842  56.174  1.00  0.00
ATOM   3646  CG  LEU   457      59.929  56.159  57.532  1.00  0.00
ATOM   3647  CD1 LEU   457      58.455  56.088  57.871  1.00  0.00
ATOM   3648  CD2 LEU   457      60.525  54.718  57.569  1.00  0.00
ATOM   3649  C   LEU   457      61.837  57.958  54.671  1.00  0.00
ATOM   3650  O   LEU   457      61.802  57.397  53.586  1.00  0.00
ATOM   3651  N   ASN   458      62.317  59.227  54.837  1.00  0.00
ATOM   3652  CA  ASN   458      63.160  59.890  53.854  1.00  0.00
ATOM   3653  CB  ASN   458      63.267  61.405  54.232  1.00  0.00
ATOM   3654  CG  ASN   458      64.340  62.099  53.432  1.00  0.00
ATOM   3655  OD1 ASN   458      64.204  62.323  52.232  1.00  0.00
ATOM   3656  ND2 ASN   458      65.468  62.328  54.003  1.00  0.00
ATOM   3657  C   ASN   458      64.531  59.193  53.937  1.00  0.00
ATOM   3658  O   ASN   458      65.085  58.730  52.886  1.00  0.00
ATOM   3659  N   GLN   459      65.200  59.093  55.090  1.00  0.00
ATOM   3660  CA  GLN   459      66.636  58.919  55.251  1.00  0.00
ATOM   3661  CB  GLN   459      67.060  59.029  56.673  1.00  0.00
ATOM   3662  CG  GLN   459      68.585  59.114  56.948  1.00  0.00
ATOM   3663  CD  GLN   459      68.798  59.611  58.407  1.00  0.00
ATOM   3664  OE1 GLN   459      68.103  59.194  59.392  1.00  0.00
ATOM   3665  NE2 GLN   459      69.892  60.325  58.714  1.00  0.00
ATOM   3666  C   GLN   459      67.174  57.634  54.567  1.00  0.00
ATOM   3667  O   GLN   459      68.136  57.842  53.756  1.00  0.00
ATOM   3668  N   LEU   460      66.650  56.481  54.819  1.00  0.00
ATOM   3669  CA  LEU   460      67.168  55.288  54.205  1.00  0.00
ATOM   3670  CB  LEU   460      66.434  53.987  54.721  1.00  0.00
ATOM   3671  CG  LEU   460      65.026  53.710  54.211  1.00  0.00
ATOM   3672  CD1 LEU   460      64.373  52.342  54.311  1.00  0.00
ATOM   3673  CD2 LEU   460      63.943  54.575  54.810  1.00  0.00
ATOM   3674  C   LEU   460      67.149  55.382  52.636  1.00  0.00
ATOM   3675  O   LEU   460      68.026  54.812  51.903  1.00  0.00
ATOM   3676  N   CYX   461      66.163  56.085  52.114  1.00  0.00
ATOM   3677  CA  CYX   461      65.955  56.170  50.673  1.00  0.00
ATOM   3678  CB  CYX   461      64.439  56.427  50.474  1.00  0.00
ATOM   3679  SG  CYX   461      63.352  55.052  51.003  1.00  0.00
ATOM   3680  C   CYX   461      66.847  57.224  50.038  1.00  0.00
ATOM   3681  O   CYX   461      67.216  57.064  48.869  1.00  0.00
ATOM   3682  N   VAL   462      67.311  58.229  50.803  1.00  0.00
ATOM   3683  CA  VAL   462      68.333  59.196  50.233  1.00  0.00
ATOM   3684  CB  VAL   462      68.176  60.603  50.949  1.00  0.00
ATOM   3685  CG1 VAL   462      69.559  61.325  50.986  1.00  0.00
ATOM   3686  CG2 VAL   462      67.055  61.569  50.416  1.00  0.00
ATOM   3687  C   VAL   462      69.669  58.500  50.448  1.00  0.00
ATOM   3688  O   VAL   462      70.492  58.512  49.552  1.00  0.00
ATOM   3689  N   LEU   463      69.859  57.620  51.450  1.00  0.00
ATOM   3690  CA  LEU   463      71.133  56.922  51.661  1.00  0.00
ATOM   3691  CB  LEU   463      71.245  56.393  53.129  1.00  0.00
ATOM   3692  CG  LEU   463      71.368  57.511  54.164  1.00  0.00
ATOM   3693  CD1 LEU   463      71.254  56.828  55.520  1.00  0.00
ATOM   3694  CD2 LEU   463      72.704  58.246  54.092  1.00  0.00
ATOM   3695  C   LEU   463      71.301  55.775  50.588  1.00  0.00
ATOM   3696  O   LEU   463      72.378  55.662  49.995  1.00  0.00
ATOM   3697  N   HID   464      70.201  55.134  50.183  1.00  0.00
ATOM   3698  CA  HID   464      70.234  54.173  49.098  1.00  0.00
ATOM   3699  CB  HID   464      68.823  53.545  49.009  1.00  0.00
ATOM   3700  CG  HID   464      68.483  52.843  47.734  1.00  0.00
ATOM   3701  ND1 HID   464      67.867  53.381  46.631  1.00  0.00
ATOM   3702  CE1 HID   464      67.640  52.375  45.805  1.00  0.00
ATOM   3703  NE2 HID   464      68.202  51.287  46.186  1.00  0.00
ATOM   3704  CD2 HID   464      68.726  51.474  47.421  1.00  0.00
ATOM   3705  C   HID   464      70.655  54.783  47.711  1.00  0.00
ATOM   3706  O   HID   464      71.122  54.111  46.811  1.00  0.00
ATOM   3707  N   GLU   465      70.432  56.094  47.515  1.00  0.00
ATOM   3708  CA  GLU   465      70.741  56.876  46.359  1.00  0.00
ATOM   3709  CB  GLU   465      69.694  58.012  46.250  1.00  0.00
ATOM   3710  CG  GLU   465      69.718  58.880  44.979  1.00  0.00
ATOM   3711  CD  GLU   465      68.368  59.341  44.466  1.00  0.00
ATOM   3712  OE1 GLU   465      68.360  60.449  43.813  1.00  0.00
ATOM   3713  OE2 GLU   465      67.262  58.753  44.675  1.00  0.00
ATOM   3714  C   GLU   465      72.163  57.475  46.393  1.00  0.00
ATOM   3715  O   GLU   465      72.557  58.167  45.493  1.00  0.00
ATOM   3716  N   LYS   466      72.975  57.199  47.407  1.00  0.00
ATOM   3717  CA  LYS   466      74.303  57.732  47.701  1.00  0.00
ATOM   3718  CB  LYS   466      74.073  58.947  48.651  1.00  0.00
ATOM   3719  CG  LYS   466      73.281  60.156  48.009  1.00  0.00
ATOM   3720  CD  LYS   466      73.959  60.881  46.836  1.00  0.00
ATOM   3721  CE  LYS   466      72.756  61.604  46.082  1.00  0.00
ATOM   3722  NZ  LYS   466      73.245  62.348  44.913  1.00  0.00
ATOM   3723  C   LYS   466      75.300  56.830  48.328  1.00  0.00
ATOM   3724  O   LYS   466      76.496  57.147  48.367  1.00  0.00
ATOM   3725  N   THR   467      74.911  55.702  48.866  1.00  0.00
ATOM   3726  CA  THR   467      75.782  54.724  49.575  1.00  0.00
ATOM   3727  CB  THR   467      75.769  54.933  51.087  1.00  0.00
ATOM   3728  CG2 THR   467      76.427  56.282  51.390  1.00  0.00
ATOM   3729  OG1 THR   467      74.505  54.894  51.597  1.00  0.00
ATOM   3730  C   THR   467      75.217  53.333  49.232  1.00  0.00
ATOM   3731  O   THR   467      73.991  53.223  49.031  1.00  0.00
ATOM   3732  N   PRO   468      76.025  52.246  49.284  1.00  0.00
ATOM   3733  CD  PRO   468      77.469  52.296  48.985  1.00  0.00
ATOM   3734  CG  PRO   468      77.816  50.878  48.558  1.00  0.00
ATOM   3735  CB  PRO   468      76.874  50.064  49.426  1.00  0.00
ATOM   3736  CA  PRO   468      75.550  50.894  49.378  1.00  0.00
ATOM   3737  C   PRO   468      74.727  50.702  50.614  1.00  0.00
ATOM   3738  O   PRO   468      75.024  51.196  51.706  1.00  0.00
ATOM   3739  N   VAL   469      73.647  49.833  50.569  1.00  0.00
ATOM   3740  CA  VAL   469      72.647  49.540  51.575  1.00  0.00
ATOM   3741  CB  VAL   469      71.382  50.379  51.456  1.00  0.00
ATOM   3742  CG1 VAL   469      71.529  51.759  51.968  1.00  0.00
ATOM   3743  CG2 VAL   469      70.667  50.259  50.077  1.00  0.00
ATOM   3744  C   VAL   469      72.301  48.102  51.464  1.00  0.00
ATOM   3745  O   VAL   469      72.268  47.578  50.360  1.00  0.00
ATOM   3746  N   SER   470      71.801  47.461  52.527  1.00  0.00
ATOM   3747  CA  SER   470      71.272  46.107  52.451  1.00  0.00
ATOM   3748  CB  SER   470      70.912  45.761  53.885  1.00  0.00
ATOM   3749  OG  SER   470      72.049  45.717  54.682  1.00  0.00
ATOM   3750  C   SER   470      70.082  45.973  51.493  1.00  0.00
ATOM   3751  O   SER   470      69.113  46.783  51.436  1.00  0.00
ATOM   3752  N   ASP   471      70.006  44.804  50.787  1.00  0.00
ATOM   3753  CA  ASP   471      69.133  44.558  49.734  1.00  0.00
ATOM   3754  CB  ASP   471      69.536  43.251  48.965  1.00  0.00
ATOM   3755  CG  ASP   471      69.585  41.982  49.842  1.00  0.00
ATOM   3756  OD1 ASP   471      68.772  41.784  50.745  1.00  0.00
ATOM   3757  OD2 ASP   471      70.502  41.200  49.542  1.00  0.00
ATOM   3758  C   ASP   471      67.630  44.521  50.151  1.00  0.00
ATOM   3759  O   ASP   471      66.821  44.456  49.245  1.00  0.00
ATOM   3760  N   ARG   472      67.286  44.524  51.482  1.00  0.00
ATOM   3761  CA  ARG   472      65.880  44.674  51.986  1.00  0.00
ATOM   3762  CB  ARG   472      65.834  44.439  53.531  1.00  0.00
ATOM   3763  CG  ARG   472      66.734  45.282  54.394  1.00  0.00
ATOM   3764  CD  ARG   472      66.931  44.575  55.718  1.00  0.00
ATOM   3765  NE  ARG   472      67.954  43.579  55.617  1.00  0.00
ATOM   3766  CZ  ARG   472      68.073  42.462  56.302  1.00  0.00
ATOM   3767  NH1 ARG   472      68.691  41.439  55.905  1.00  0.00
ATOM   3768  NH2 ARG   472      67.522  42.280  57.484  1.00  0.00
ATOM   3769  C   ARG   472      65.190  46.047  51.633  1.00  0.00
ATOM   3770  O   ARG   472      63.956  46.173  51.634  1.00  0.00
ATOM   3771  N   VAL   473      65.978  47.125  51.319  1.00  0.00
ATOM   3772  CA  VAL   473      65.324  48.470  51.089  1.00  0.00
ATOM   3773  CB  VAL   473      65.904  49.607  51.917  1.00  0.00
ATOM   3774  CG1 VAL   473      65.809  49.262  53.415  1.00  0.00
ATOM   3775  CG2 VAL   473      67.419  49.997  51.683  1.00  0.00
ATOM   3776  C   VAL   473      65.218  48.973  49.642  1.00  0.00
ATOM   3777  O   VAL   473      64.532  49.975  49.374  1.00  0.00
ATOM   3778  N   THR   474      65.806  48.281  48.733  1.00  0.00
ATOM   3779  CA  THR   474      65.946  48.852  47.342  1.00  0.00
ATOM   3780  CB  THR   474      66.870  47.994  46.488  1.00  0.00
ATOM   3781  CG2 THR   474      68.177  47.782  47.264  1.00  0.00
ATOM   3782  OG1 THR   474      66.353  46.709  46.463  1.00  0.00
ATOM   3783  C   THR   474      64.616  49.037  46.606  1.00  0.00
ATOM   3784  O   THR   474      64.391  50.053  45.903  1.00  0.00
ATOM   3785  N   LYS   475      63.655  48.118  46.741  1.00  0.00
ATOM   3786  CA  LYS   475      62.289  48.234  46.201  1.00  0.00
ATOM   3787  CB  LYS   475      61.630  46.872  46.069  1.00  0.00
ATOM   3788  CG  LYS   475      62.198  45.914  45.115  1.00  0.00
ATOM   3789  CD  LYS   475      61.296  44.601  44.944  1.00  0.00
ATOM   3790  CE  LYS   475      61.088  43.834  46.229  1.00  0.00
ATOM   3791  NZ  LYS   475      62.402  43.381  46.730  1.00  0.00
ATOM   3792  C   LYS   475      61.483  49.190  47.097  1.00  0.00
ATOM   3793  O   LYS   475      60.661  49.963  46.603  1.00  0.00
ATOM   3794  N   CYX   476      61.685  49.086  48.415  1.00  0.00
ATOM   3795  CA  CYX   476      60.815  49.937  49.277  1.00  0.00
ATOM   3796  CB  CYX   476      60.811  49.473  50.690  1.00  0.00
ATOM   3797  SG  CYX   476      61.976  50.281  51.806  1.00  0.00
ATOM   3798  C   CYX   476      61.061  51.441  49.158  1.00  0.00
ATOM   3799  O   CYX   476      60.202  52.225  49.532  1.00  0.00
ATOM   3800  N   CYX   477      62.225  51.806  48.561  1.00  0.00
ATOM   3801  CA  CYX   477      62.470  53.169  48.097  1.00  0.00
ATOM   3802  CB  CYX   477      63.929  53.515  48.494  1.00  0.00
ATOM   3803  SG  CYX   477      64.279  53.451  50.225  1.00  0.00
ATOM   3804  C   CYX   477      62.155  53.452  46.588  1.00  0.00
ATOM   3805  O   CYX   477      61.597  54.533  46.272  1.00  0.00
ATOM   3806  N   THR   478      62.392  52.492  45.707  1.00  0.00
ATOM   3807  CA  THR   478      62.127  52.750  44.238  1.00  0.00
ATOM   3808  CB  THR   478      62.908  51.716  43.367  1.00  0.00
ATOM   3809  CG2 THR   478      62.785  52.205  41.927  1.00  0.00
ATOM   3810  OG1 THR   478      64.226  51.696  43.703  1.00  0.00
ATOM   3811  C   THR   478      60.641  52.692  43.895  1.00  0.00
ATOM   3812  O   THR   478      60.239  53.302  42.907  1.00  0.00
ATOM   3813  N   GLU   479      59.904  51.860  44.680  1.00  0.00
ATOM   3814  CA  GLU   479      58.501  51.441  44.480  1.00  0.00
ATOM   3815  CB  GLU   479      58.213  49.869  44.308  1.00  0.00
ATOM   3816  CG  GLU   479      59.033  49.045  43.312  1.00  0.00
ATOM   3817  CD  GLU   479      58.335  47.747  42.937  1.00  0.00
ATOM   3818  OE1 GLU   479      57.864  47.084  43.821  1.00  0.00
ATOM   3819  OE2 GLU   479      58.221  47.408  41.735  1.00  0.00
ATOM   3820  C   GLU   479      57.621  51.928  45.675  1.00  0.00
ATOM   3821  O   GLU   479      56.634  52.493  45.314  1.00  0.00
ATOM   3822  N   SER   480      57.976  51.722  46.877  1.00  0.00
ATOM   3823  CA  SER   480      57.107  52.156  48.033  1.00  0.00
ATOM   3824  CB  SER   480      57.048  51.144  49.197  1.00  0.00
ATOM   3825  OG  SER   480      56.940  49.930  48.611  1.00  0.00
ATOM   3826  C   SER   480      57.354  53.588  48.466  1.00  0.00
ATOM   3827  O   SER   480      58.424  54.143  48.209  1.00  0.00
ATOM   3828  N   LEU   481      56.347  54.113  49.183  1.00  0.00
ATOM   3829  CA  LEU   481      56.361  55.472  49.587  1.00  0.00
ATOM   3830  CB  LEU   481      55.778  56.280  48.431  1.00  0.00
ATOM   3831  CG  LEU   481      56.121  57.771  48.444  1.00  0.00
ATOM   3832  CD1 LEU   481      57.604  57.976  48.541  1.00  0.00
ATOM   3833  CD2 LEU   481      55.494  58.524  47.206  1.00  0.00
ATOM   3834  C   LEU   481      55.606  55.694  50.937  1.00  0.00
ATOM   3835  O   LEU   481      55.929  56.542  51.769  1.00  0.00
ATOM   3836  N   VAL   482      54.613  54.849  51.175  1.00  0.00
ATOM   3837  CA  VAL   482      53.681  55.013  52.296  1.00  0.00
ATOM   3838  CB  VAL   482      52.215  55.427  51.930  1.00  0.00
ATOM   3839  CG1 VAL   482      52.263  56.862  51.306  1.00  0.00
ATOM   3840  CG2 VAL   482      51.597  54.473  50.986  1.00  0.00
ATOM   3841  C   VAL   482      53.733  53.805  53.242  1.00  0.00
ATOM   3842  O   VAL   482      53.158  53.895  54.324  1.00  0.00
ATOM   3843  N   ASN   483      54.517  52.776  52.922  1.00  0.00
ATOM   3844  CA  ASN   483      54.801  51.558  53.665  1.00  0.00
ATOM   3845  CB  ASN   483      53.886  50.462  53.036  1.00  0.00
ATOM   3846  CG  ASN   483      53.837  49.249  53.863  1.00  0.00
ATOM   3847  OD1 ASN   483      53.743  49.321  55.113  1.00  0.00
ATOM   3848  ND2 ASN   483      53.982  48.078  53.320  1.00  0.00
ATOM   3849  C   ASN   483      56.330  51.247  53.635  1.00  0.00
ATOM   3850  O   ASN   483      56.783  50.357  52.939  1.00  0.00
ATOM   3851  N   ARG   484      57.098  51.980  54.422  1.00  0.00
ATOM   3852  CA  ARG   484      58.520  51.813  54.585  1.00  0.00
ATOM   3853  CB  ARG   484      59.230  53.114  54.163  1.00  0.00
ATOM   3854  CG  ARG   484      59.155  53.305  52.582  1.00  0.00
ATOM   3855  CD  ARG   484      59.931  54.527  52.122  1.00  0.00
ATOM   3856  NE  ARG   484      59.930  54.847  50.725  1.00  0.00
ATOM   3857  CZ  ARG   484      60.261  55.953  50.155  1.00  0.00
ATOM   3858  NH1 ARG   484      60.420  56.089  48.928  1.00  0.00
ATOM   3859  NH2 ARG   484      60.501  57.077  50.800  1.00  0.00
ATOM   3860  C   ARG   484      58.840  51.420  56.036  1.00  0.00
ATOM   3861  O   ARG   484      59.920  50.941  56.254  1.00  0.00
ATOM   3862  N   ARG   485      57.951  51.359  57.002  1.00  0.00
ATOM   3863  CA  ARG   485      58.265  50.872  58.390  1.00  0.00
ATOM   3864  CB  ARG   485      57.046  51.243  59.243  1.00  0.00
ATOM   3865  CG  ARG   485      57.145  52.709  59.633  1.00  0.00
ATOM   3866  CD  ARG   485      56.146  52.957  60.774  1.00  0.00
ATOM   3867  NE  ARG   485      54.710  53.172  60.289  1.00  0.00
ATOM   3868  CZ  ARG   485      53.630  52.411  60.399  1.00  0.00
ATOM   3869  NH1 ARG   485      52.528  52.872  59.963  1.00  0.00
ATOM   3870  NH2 ARG   485      53.594  51.308  61.102  1.00  0.00
ATOM   3871  C   ARG   485      58.567  49.358  58.420  1.00  0.00
ATOM   3872  O   ARG   485      59.461  49.020  59.243  1.00  0.00
ATOM   3873  N   PRO   486      57.879  48.413  57.670  1.00  0.00
ATOM   3874  CD  PRO   486      56.677  48.591  56.876  1.00  0.00
ATOM   3875  CG  PRO   486      56.214  47.187  56.499  1.00  0.00
ATOM   3876  CB  PRO   486      57.408  46.273  56.680  1.00  0.00
ATOM   3877  CA  PRO   486      58.462  47.069  57.579  1.00  0.00
ATOM   3878  C   PRO   486      59.909  47.061  57.078  1.00  0.00
ATOM   3879  O   PRO   486      60.743  46.373  57.702  1.00  0.00
ATOM   3880  N   CYX   487      60.304  47.806  56.050  1.00  0.00
ATOM   3881  CA  CYX   487      61.656  47.737  55.459  1.00  0.00
ATOM   3882  CB  CYX   487      61.729  48.233  54.005  1.00  0.00
ATOM   3883  SG  CYX   487      61.540  49.967  53.661  1.00  0.00
ATOM   3884  C   CYX   487      62.665  48.451  56.401  1.00  0.00
ATOM   3885  O   CYX   487      63.790  47.973  56.588  1.00  0.00
ATOM   3886  N   PHE   488      62.254  49.539  57.049  1.00  0.00
ATOM   3887  CA  PHE   488      63.115  50.272  58.022  1.00  0.00
ATOM   3888  CB  PHE   488      62.550  51.661  58.324  1.00  0.00
ATOM   3889  CG  PHE   488      63.387  52.451  59.302  1.00  0.00
ATOM   3890  CD1 PHE   488      64.620  53.019  58.964  1.00  0.00
ATOM   3891  CE1 PHE   488      65.392  53.724  59.902  1.00  0.00
ATOM   3892  CZ  PHE   488      64.981  53.804  61.212  1.00  0.00
ATOM   3893  CE2 PHE   488      63.746  53.302  61.594  1.00  0.00
ATOM   3894  CD2 PHE   488      62.850  52.831  60.602  1.00  0.00
ATOM   3895  C   PHE   488      63.368  49.447  59.287  1.00  0.00
ATOM   3896  O   PHE   488      64.476  49.355  59.795  1.00  0.00
ATOM   3897  N   SER   489      62.362  48.756  59.816  1.00  0.00
ATOM   3898  CA  SER   489      62.628  47.902  61.046  1.00  0.00
ATOM   3899  CB  SER   489      61.317  47.512  61.724  1.00  0.00
ATOM   3900  OG  SER   489      60.323  47.112  60.827  1.00  0.00
ATOM   3901  C   SER   489      63.385  46.649  60.709  1.00  0.00
ATOM   3902  O   SER   489      64.166  46.152  61.537  1.00  0.00
ATOM   3903  N   ALA   490      63.287  46.256  59.457  1.00  0.00
ATOM   3904  CA  ALA   490      64.059  45.118  58.973  1.00  0.00
ATOM   3905  CB  ALA   490      63.516  44.679  57.661  1.00  0.00
ATOM   3906  C   ALA   490      65.580  45.397  58.944  1.00  0.00
ATOM   3907  O   ALA   490      66.400  44.509  58.873  1.00  0.00
ATOM   3908  N   LEU   491      65.973  46.672  59.136  1.00  0.00
ATOM   3909  CA  LEU   491      67.371  47.040  59.386  1.00  0.00
ATOM   3910  CB  LEU   491      67.535  48.543  58.942  1.00  0.00
ATOM   3911  CG  LEU   491      67.033  48.999  57.597  1.00  0.00
ATOM   3912  CD1 LEU   491      67.266  50.537  57.464  1.00  0.00
ATOM   3913  CD2 LEU   491      67.872  48.318  56.564  1.00  0.00
ATOM   3914  C   LEU   491      67.898  46.821  60.820  1.00  0.00
ATOM   3915  O   LEU   491      69.130  46.825  61.043  1.00  0.00
ATOM   3916  N   GLU   492      67.085  46.410  61.772  1.00  0.00
ATOM   3917  CA  GLU   492      67.394  46.310  63.188  1.00  0.00
ATOM   3918  CB  GLU   492      66.242  46.812  64.085  1.00  0.00
ATOM   3919  CG  GLU   492      66.628  47.292  65.499  1.00  0.00
ATOM   3920  CD  GLU   492      65.260  47.377  66.349  1.00  0.00
ATOM   3921  OE1 GLU   492      65.440  47.809  67.481  1.00  0.00
ATOM   3922  OE2 GLU   492      64.074  47.104  65.901  1.00  0.00
ATOM   3923  C   GLU   492      67.851  44.886  63.645  1.00  0.00
ATOM   3924  O   GLU   492      68.522  44.587  64.657  1.00  0.00
ATOM   3925  N   VAL   493      67.502  43.890  62.781  1.00  0.00
ATOM   3926  CA  VAL   493      67.976  42.545  62.797  1.00  0.00
ATOM   3927  CB  VAL   493      66.877  41.476  62.592  1.00  0.00
ATOM   3928  CG1 VAL   493      65.853  41.237  63.730  1.00  0.00
ATOM   3929  CG2 VAL   493      66.028  41.829  61.293  1.00  0.00
ATOM   3930  C   VAL   493      69.148  42.342  61.698  1.00  0.00
ATOM   3931  O   VAL   493      69.699  41.231  61.589  1.00  0.00
ATOM   3932  N   ASP   494      69.346  43.277  60.781  1.00  0.00
ATOM   3933  CA  ASP   494      70.450  43.144  59.736  1.00  0.00
ATOM   3934  CB  ASP   494      70.250  44.309  58.804  1.00  0.00
ATOM   3935  CG  ASP   494      71.170  44.140  57.568  1.00  0.00
ATOM   3936  OD1 ASP   494      72.355  44.557  57.706  1.00  0.00
ATOM   3937  OD2 ASP   494      70.681  43.837  56.461  1.00  0.00
ATOM   3938  C   ASP   494      71.901  43.161  60.283  1.00  0.00
ATOM   3939  O   ASP   494      72.271  43.998  61.146  1.00  0.00
ATOM   3940  N   GLU   495      72.698  42.216  59.850  1.00  0.00
ATOM   3941  CA  GLU   495      73.988  41.819  60.492  1.00  0.00
ATOM   3942  CB  GLU   495      73.993  40.370  60.835  1.00  0.00
ATOM   3943  CG  GLU   495      73.176  40.065  62.120  1.00  0.00
ATOM   3944  CD  GLU   495      73.299  38.571  62.437  1.00  0.00
ATOM   3945  OE1 GLU   495      72.694  37.767  61.738  1.00  0.00
ATOM   3946  OE2 GLU   495      74.050  38.148  63.360  1.00  0.00
ATOM   3947  C   GLU   495      75.128  42.220  59.601  1.00  0.00
ATOM   3948  O   GLU   495      76.233  41.695  59.682  1.00  0.00
ATOM   3949  N   THR   496      74.947  43.226  58.700  1.00  0.00
ATOM   3950  CA  THR   496      75.958  43.687  57.689  1.00  0.00
ATOM   3951  CB  THR   496      75.367  43.748  56.279  1.00  0.00
ATOM   3952  CG2 THR   496      74.592  42.456  55.882  1.00  0.00
ATOM   3953  OG1 THR   496      74.454  44.816  56.234  1.00  0.00
ATOM   3954  C   THR   496      76.786  44.895  58.085  1.00  0.00
ATOM   3955  O   THR   496      77.911  45.050  57.567  1.00  0.00
ATOM   3956  N   TYR   497      76.325  45.715  59.006  1.00  0.00
ATOM   3957  CA  TYR   497      77.187  46.423  59.855  1.00  0.00
ATOM   3958  CB  TYR   497      76.365  47.472  60.599  1.00  0.00
ATOM   3959  CG  TYR   497      77.169  48.532  61.375  1.00  0.00
ATOM   3960  CD1 TYR   497      77.874  49.463  60.600  1.00  0.00
ATOM   3961  CE1 TYR   497      78.627  50.434  61.287  1.00  0.00
ATOM   3962  CZ  TYR   497      78.792  50.358  62.699  1.00  0.00
ATOM   3963  OH  TYR   497      79.686  51.221  63.292  1.00  0.00
ATOM   3964  CE2 TYR   497      77.989  49.437  63.472  1.00  0.00
ATOM   3965  CD2 TYR   497      77.146  48.591  62.773  1.00  0.00
ATOM   3966  C   TYR   497      78.013  45.456  60.767  1.00  0.00
ATOM   3967  O   TYR   497      77.544  44.476  61.243  1.00  0.00
ATOM   3968  N   VAL   498      79.194  45.900  61.000  1.00  0.00
ATOM   3969  CA  VAL   498      80.071  45.272  62.028  1.00  0.00
ATOM   3970  CB  VAL   498      81.228  44.469  61.407  1.00  0.00
ATOM   3971  CG1 VAL   498      80.604  43.233  60.848  1.00  0.00
ATOM   3972  CG2 VAL   498      82.034  45.146  60.291  1.00  0.00
ATOM   3973  C   VAL   498      80.624  46.349  63.026  1.00  0.00
ATOM   3974  O   VAL   498      80.743  47.543  62.663  1.00  0.00
ATOM   3975  N   PRO   499      80.917  45.960  64.288  1.00  0.00
ATOM   3976  CD  PRO   499      80.979  44.530  64.765  1.00  0.00
ATOM   3977  CG  PRO   499      81.763  44.591  66.088  1.00  0.00
ATOM   3978  CB  PRO   499      81.394  46.021  66.647  1.00  0.00
ATOM   3979  CA  PRO   499      81.227  46.900  65.370  1.00  0.00
ATOM   3980  C   PRO   499      82.512  47.684  65.125  1.00  0.00
ATOM   3981  O   PRO   499      83.471  46.934  64.917  1.00  0.00
ATOM   3982  N   LYS   500      82.459  49.069  65.286  1.00  0.00
ATOM   3983  CA  LYS   500      83.714  49.904  65.362  1.00  0.00
ATOM   3984  CB  LYS   500      83.370  51.333  64.818  1.00  0.00
ATOM   3985  CG  LYS   500      82.300  51.999  65.727  1.00  0.00
ATOM   3986  CD  LYS   500      82.172  53.497  65.451  1.00  0.00
ATOM   3987  CE  LYS   500      83.421  54.393  65.649  1.00  0.00
ATOM   3988  NZ  LYS   500      83.590  54.921  67.025  1.00  0.00
ATOM   3989  C   LYS   500      84.455  49.836  66.757  1.00  0.00
ATOM   3990  O   LYS   500      83.958  49.317  67.775  1.00  0.00
ATOM   3991  N   GLU   501      85.647  50.322  66.766  1.00  0.00
ATOM   3992  CA  GLU   501      86.390  50.664  67.954  1.00  0.00
ATOM   3993  CB  GLU   501      87.697  51.228  67.466  1.00  0.00
ATOM   3994  CG  GLU   501      88.670  51.531  68.659  1.00  0.00
ATOM   3995  CD  GLU   501      88.985  50.367  69.564  1.00  0.00
ATOM   3996  OE1 GLU   501      88.092  50.002  70.455  1.00  0.00
ATOM   3997  OE2 GLU   501      90.062  49.784  69.504  1.00  0.00
ATOM   3998  C   GLU   501      85.491  51.621  68.823  1.00  0.00
ATOM   3999  O   GLU   501      84.745  52.471  68.297  1.00  0.00
ATOM   4000  N   PHE   502      85.695  51.561  70.143  1.00  0.00
ATOM   4001  CA  PHE   502      85.142  52.492  71.160  1.00  0.00
ATOM   4002  CB  PHE   502      84.410  51.787  72.273  1.00  0.00
ATOM   4003  CG  PHE   502      83.801  52.543  73.396  1.00  0.00
ATOM   4004  CD1 PHE   502      84.553  52.804  74.562  1.00  0.00
ATOM   4005  CE1 PHE   502      83.965  53.514  75.633  1.00  0.00
ATOM   4006  CZ  PHE   502      82.666  54.056  75.504  1.00  0.00
ATOM   4007  CE2 PHE   502      82.003  53.911  74.293  1.00  0.00
ATOM   4008  CD2 PHE   502      82.541  53.126  73.219  1.00  0.00
ATOM   4009  C   PHE   502      86.251  53.389  71.742  1.00  0.00
ATOM   4010  O   PHE   502      87.077  53.052  72.605  1.00  0.00
ATOM   4011  N   ASN   503      86.114  54.648  71.478  1.00  0.00
ATOM   4012  CA  ASN   503      86.914  55.772  71.988  1.00  0.00
ATOM   4013  CB  ASN   503      87.120  56.781  70.845  1.00  0.00
ATOM   4014  CG  ASN   503      88.061  56.429  69.638  1.00  0.00
ATOM   4015  OD1 ASN   503      89.233  56.347  69.720  1.00  0.00
ATOM   4016  ND2 ASN   503      87.530  56.439  68.437  1.00  0.00
ATOM   4017  C   ASN   503      86.289  56.302  73.298  1.00  0.00
ATOM   4018  O   ASN   503      85.136  56.756  73.411  1.00  0.00
ATOM   4019  N   ALA   504      87.085  56.223  74.404  1.00  0.00
ATOM   4020  CA  ALA   504      86.696  56.618  75.761  1.00  0.00
ATOM   4021  CB  ALA   504      87.507  55.805  76.832  1.00  0.00
ATOM   4022  C   ALA   504      86.855  58.098  76.042  1.00  0.00
ATOM   4023  O   ALA   504      86.158  58.719  76.828  1.00  0.00
ATOM   4024  N   GLU   505      87.742  58.760  75.310  1.00  0.00
ATOM   4025  CA  GLU   505      88.112  60.197  75.472  1.00  0.00
ATOM   4026  CB  GLU   505      89.325  60.565  74.622  1.00  0.00
ATOM   4027  CG  GLU   505      89.201  60.259  73.116  1.00  0.00
ATOM   4028  CD  GLU   505      90.271  60.818  72.212  1.00  0.00
ATOM   4029  OE1 GLU   505      90.774  61.962  72.468  1.00  0.00
ATOM   4030  OE2 GLU   505      90.594  60.106  71.227  1.00  0.00
ATOM   4031  C   GLU   505      86.945  61.137  75.217  1.00  0.00
ATOM   4032  O   GLU   505      87.135  62.272  75.588  1.00  0.00
ATOM   4033  N   THR   506      85.806  60.692  74.723  1.00  0.00
ATOM   4034  CA  THR   506      84.474  61.310  74.903  1.00  0.00
ATOM   4035  CB  THR   506      83.366  60.336  74.470  1.00  0.00
ATOM   4036  CG2 THR   506      81.968  60.906  74.559  1.00  0.00
ATOM   4037  OG1 THR   506      83.616  59.914  73.118  1.00  0.00
ATOM   4038  C   THR   506      84.231  61.792  76.346  1.00  0.00
ATOM   4039  O   THR   506      83.498  62.770  76.435  1.00  0.00
ATOM   4040  N   PHE   507      84.641  61.090  77.350  1.00  0.00
ATOM   4041  CA  PHE   507      84.441  61.445  78.763  1.00  0.00
ATOM   4042  CB  PHE   507      83.054  60.875  79.263  1.00  0.00
ATOM   4043  CG  PHE   507      83.025  59.353  79.345  1.00  0.00
ATOM   4044  CD1 PHE   507      82.537  58.604  78.260  1.00  0.00
ATOM   4045  CE1 PHE   507      82.399  57.252  78.370  1.00  0.00
ATOM   4046  CZ  PHE   507      82.836  56.625  79.587  1.00  0.00
ATOM   4047  CE2 PHE   507      83.273  57.328  80.706  1.00  0.00
ATOM   4048  CD2 PHE   507      83.315  58.730  80.578  1.00  0.00
ATOM   4049  C   PHE   507      85.558  61.012  79.674  1.00  0.00
ATOM   4050  O   PHE   507      85.693  61.616  80.768  1.00  0.00
ATOM   4051  N   THR   508      86.542  60.110  79.317  1.00  0.00
ATOM   4052  CA  THR   508      87.757  59.931  80.073  1.00  0.00
ATOM   4053  CB  THR   508      88.237  58.482  79.899  1.00  0.00
ATOM   4054  CG2 THR   508      87.199  57.443  80.313  1.00  0.00
ATOM   4055  OG1 THR   508      88.546  58.188  78.512  1.00  0.00
ATOM   4056  C   THR   508      88.843  60.893  79.621  1.00  0.00
ATOM   4057  O   THR   508      89.990  60.486  79.523  1.00  0.00
ATOM   4058  N   PHE   509      88.528  62.136  79.287  1.00  0.00
ATOM   4059  CA  PHE   509      89.477  63.224  79.128  1.00  0.00
ATOM   4060  CB  PHE   509      89.320  63.888  77.753  1.00  0.00
ATOM   4061  CG  PHE   509      90.249  65.022  77.257  1.00  0.00
ATOM   4062  CD1 PHE   509      90.189  66.305  77.914  1.00  0.00
ATOM   4063  CE1 PHE   509      90.925  67.361  77.334  1.00  0.00
ATOM   4064  CZ  PHE   509      91.831  67.085  76.262  1.00  0.00
ATOM   4065  CE2 PHE   509      92.123  65.765  75.890  1.00  0.00
ATOM   4066  CD2 PHE   509      91.282  64.766  76.348  1.00  0.00
ATOM   4067  C   PHE   509      89.216  64.222  80.277  1.00  0.00
ATOM   4068  O   PHE   509      88.070  64.397  80.739  1.00  0.00
ATOM   4069  N   HIE   510      90.284  64.825  80.905  1.00  0.00
ATOM   4070  CA  HIE   510      90.222  65.741  82.027  1.00  0.00
ATOM   4071  CB  HIE   510      91.581  66.394  82.274  1.00  0.00
ATOM   4072  CG  HIE   510      91.669  67.351  83.382  1.00  0.00
ATOM   4073  ND1 HIE   510      90.757  67.465  84.390  1.00  0.00
ATOM   4074  CE1 HIE   510      91.242  68.511  85.130  1.00  0.00
ATOM   4075  NE2 HIE   510      92.331  69.083  84.570  1.00  0.00
ATOM   4076  CD2 HIE   510      92.530  68.421  83.413  1.00  0.00
ATOM   4077  C   HIE   510      89.184  66.855  81.840  1.00  0.00
ATOM   4078  O   HIE   510      89.284  67.671  80.907  1.00  0.00
ATOM   4079  N   ALA   511      88.237  67.011  82.774  1.00  0.00
ATOM   4080  CA  ALA   511      87.247  68.081  82.825  1.00  0.00
ATOM   4081  CB  ALA   511      87.862  69.360  83.434  1.00  0.00
ATOM   4082  C   ALA   511      86.258  68.328  81.643  1.00  0.00
ATOM   4083  O   ALA   511      85.452  69.304  81.617  1.00  0.00
ATOM   4084  N   ASP   512      86.193  67.391  80.694  1.00  0.00
ATOM   4085  CA  ASP   512      85.424  67.477  79.545  1.00  0.00
ATOM   4086  CB  ASP   512      85.726  66.132  78.688  1.00  0.00
ATOM   4087  CG  ASP   512      85.642  66.387  77.193  1.00  0.00
ATOM   4088  OD1 ASP   512      86.284  67.345  76.695  1.00  0.00
ATOM   4089  OD2 ASP   512      84.894  65.737  76.460  1.00  0.00
ATOM   4090  C   ASP   512      83.949  67.620  79.743  1.00  0.00
ATOM   4091  O   ASP   512      83.325  68.470  79.086  1.00  0.00
ATOM   4092  N   ILE   513      83.413  66.907  80.739  1.00  0.00
ATOM   4093  CA  ILE   513      81.928  66.892  80.980  1.00  0.00
ATOM   4094  CB  ILE   513      81.658  65.441  81.388  1.00  0.00
ATOM   4095  CG2 ILE   513      82.050  64.502  80.184  1.00  0.00
ATOM   4096  CG1 ILE   513      82.262  65.103  82.770  1.00  0.00
ATOM   4097  CD1 ILE   513      82.314  63.557  83.070  1.00  0.00
ATOM   4098  C   ILE   513      81.536  68.022  81.974  1.00  0.00
ATOM   4099  O   ILE   513      80.403  68.033  82.502  1.00  0.00
ATOM   4100  N   CYX   514      82.459  68.920  82.370  1.00  0.00
ATOM   4101  CA  CYX   514      82.307  69.835  83.549  1.00  0.00
ATOM   4102  CB  CYX   514      83.608  69.853  84.417  1.00  0.00
ATOM   4103  SG  CYX   514      84.027  68.129  84.877  1.00  0.00
ATOM   4104  C   CYX   514      81.835  71.206  83.154  1.00  0.00
ATOM   4105  O   CYX   514      82.053  71.640  82.066  1.00  0.00
ATOM   4106  N   THR   515      81.065  71.893  84.012  1.00  0.00
ATOM   4107  CA  THR   515      80.343  73.133  83.704  1.00  0.00
ATOM   4108  CB  THR   515      81.258  74.437  83.559  1.00  0.00
ATOM   4109  CG2 THR   515      82.274  74.679  84.652  1.00  0.00
ATOM   4110  OG1 THR   515      82.010  74.299  82.404  1.00  0.00
ATOM   4111  C   THR   515      79.310  73.075  82.608  1.00  0.00
ATOM   4112  O   THR   515      78.961  74.089  81.988  1.00  0.00
ATOM   4113  N   LEU   516      78.947  71.829  82.280  1.00  0.00
ATOM   4114  CA  LEU   516      77.769  71.401  81.541  1.00  0.00
ATOM   4115  CB  LEU   516      77.829  69.979  80.926  1.00  0.00
ATOM   4116  CG  LEU   516      78.944  69.662  79.943  1.00  0.00
ATOM   4117  CD1 LEU   516      78.721  68.165  79.463  1.00  0.00
ATOM   4118  CD2 LEU   516      79.048  70.618  78.809  1.00  0.00
ATOM   4119  C   LEU   516      76.553  71.602  82.390  1.00  0.00
ATOM   4120  O   LEU   516      76.531  71.161  83.571  1.00  0.00
ATOM   4121  N   SER   517      75.591  72.307  81.783  1.00  0.00
ATOM   4122  CA  SER   517      74.230  72.472  82.308  1.00  0.00
ATOM   4123  CB  SER   517      73.560  73.790  81.947  1.00  0.00
ATOM   4124  OG  SER   517      73.281  73.823  80.570  1.00  0.00
ATOM   4125  C   SER   517      73.331  71.263  82.095  1.00  0.00
ATOM   4126  O   SER   517      73.645  70.350  81.323  1.00  0.00
ATOM   4127  N   GLU   518      72.267  71.127  82.822  1.00  0.00
ATOM   4128  CA  GLU   518      71.474  69.862  83.003  1.00  0.00
ATOM   4129  CB  GLU   518      70.445  70.119  84.071  1.00  0.00
ATOM   4130  CG  GLU   518      69.789  68.908  84.791  1.00  0.00
ATOM   4131  CD  GLU   518      68.990  69.188  86.010  1.00  0.00
ATOM   4132  OE1 GLU   518      68.165  70.146  85.920  1.00  0.00
ATOM   4133  OE2 GLU   518      69.139  68.459  87.010  1.00  0.00
ATOM   4134  C   GLU   518      70.883  69.388  81.636  1.00  0.00
ATOM   4135  O   GLU   518      70.851  68.139  81.550  1.00  0.00
ATOM   4136  N   LYS   519      70.524  70.255  80.643  1.00  0.00
ATOM   4137  CA  LYS   519      70.307  69.923  79.248  1.00  0.00
ATOM   4138  CB  LYS   519      69.766  71.145  78.482  1.00  0.00
ATOM   4139  CG  LYS   519      68.440  71.653  79.015  1.00  0.00
ATOM   4140  CD  LYS   519      67.821  72.850  78.230  1.00  0.00
ATOM   4141  CE  LYS   519      67.124  72.429  76.918  1.00  0.00
ATOM   4142  NZ  LYS   519      65.931  71.585  77.284  1.00  0.00
ATOM   4143  C   LYS   519      71.518  69.406  78.529  1.00  0.00
ATOM   4144  O   LYS   519      71.414  68.315  77.952  1.00  0.00
ATOM   4145  N   GLU   520      72.694  70.000  78.642  1.00  0.00
ATOM   4146  CA  GLU   520      73.931  69.619  77.958  1.00  0.00
ATOM   4147  CB  GLU   520      75.003  70.658  78.255  1.00  0.00
ATOM   4148  CG  GLU   520      74.761  72.003  77.598  1.00  0.00
ATOM   4149  CD  GLU   520      75.876  72.934  78.195  1.00  0.00
ATOM   4150  OE1 GLU   520      76.756  73.353  77.410  1.00  0.00
ATOM   4151  OE2 GLU   520      75.617  73.413  79.318  1.00  0.00
ATOM   4152  C   GLU   520      74.440  68.221  78.405  1.00  0.00
ATOM   4153  O   GLU   520      74.708  67.389  77.578  1.00  0.00
ATOM   4154  N   ARG   521      74.386  67.978  79.765  1.00  0.00
ATOM   4155  CA  ARG   521      74.656  66.656  80.413  1.00  0.00
ATOM   4156  CB  ARG   521      74.158  66.763  81.891  1.00  0.00
ATOM   4157  CG  ARG   521      75.125  67.614  82.743  1.00  0.00
ATOM   4158  CD  ARG   521      74.766  67.543  84.173  1.00  0.00
ATOM   4159  NE  ARG   521      75.589  68.431  84.909  1.00  0.00
ATOM   4160  CZ  ARG   521      76.117  68.350  86.155  1.00  0.00
ATOM   4161  NH1 ARG   521      76.893  69.296  86.537  1.00  0.00
ATOM   4162  NH2 ARG   521      75.773  67.466  87.061  1.00  0.00
ATOM   4163  C   ARG   521      73.953  65.484  79.712  1.00  0.00
ATOM   4164  O   ARG   521      74.581  64.438  79.504  1.00  0.00
ATOM   4165  N   GLN   522      72.719  65.682  79.280  1.00  0.00
ATOM   4166  CA  GLN   522      71.878  64.661  78.762  1.00  0.00
ATOM   4167  CB  GLN   522      70.397  65.094  78.857  1.00  0.00
ATOM   4168  CG  GLN   522      69.915  65.121  80.319  1.00  0.00
ATOM   4169  CD  GLN   522      68.464  65.604  80.288  1.00  0.00
ATOM   4170  OE1 GLN   522      67.517  64.873  80.474  1.00  0.00
ATOM   4171  NE2 GLN   522      68.217  66.921  80.220  1.00  0.00
ATOM   4172  C   GLN   522      72.203  64.493  77.300  1.00  0.00
ATOM   4173  O   GLN   522      72.109  63.345  76.746  1.00  0.00
ATOM   4174  N   ILE   523      72.595  65.522  76.496  1.00  0.00
ATOM   4175  CA  ILE   523      73.157  65.364  75.071  1.00  0.00
ATOM   4176  CB  ILE   523      73.193  66.661  74.239  1.00  0.00
ATOM   4177  CG2 ILE   523      73.874  66.639  72.835  1.00  0.00
ATOM   4178  CG1 ILE   523      71.782  67.336  73.938  1.00  0.00
ATOM   4179  CD1 ILE   523      71.672  68.841  73.867  1.00  0.00
ATOM   4180  C   ILE   523      74.543  64.635  75.068  1.00  0.00
ATOM   4181  O   ILE   523      74.727  63.729  74.272  1.00  0.00
ATOM   4182  N   LYS   524      75.430  64.937  76.015  1.00  0.00
ATOM   4183  CA  LYS   524      76.759  64.359  76.278  1.00  0.00
ATOM   4184  CB  LYS   524      77.522  65.277  77.234  1.00  0.00
ATOM   4185  CG  LYS   524      79.019  64.864  77.291  1.00  0.00
ATOM   4186  CD  LYS   524      79.966  65.312  76.119  1.00  0.00
ATOM   4187  CE  LYS   524      81.432  65.184  76.570  1.00  0.00
ATOM   4188  NZ  LYS   524      82.368  65.534  75.508  1.00  0.00
ATOM   4189  C   LYS   524      76.668  62.874  76.764  1.00  0.00
ATOM   4190  O   LYS   524      77.321  62.064  76.110  1.00  0.00
ATOM   4191  N   LYN   525      75.824  62.459  77.669  1.00  0.00
ATOM   4192  CA  LYN   525      75.467  61.044  77.901  1.00  0.00
ATOM   4193  CB  LYN   525      74.434  60.910  79.009  1.00  0.00
ATOM   4194  CG  LYN   525      75.076  61.182  80.387  1.00  0.00
ATOM   4195  CD  LYN   525      74.139  60.831  81.567  1.00  0.00
ATOM   4196  CE  LYN   525      72.931  61.710  81.539  1.00  0.00
ATOM   4197  NZ  LYN   525      72.118  61.573  82.800  1.00  0.00
ATOM   4198  C   LYN   525      74.875  60.357  76.569  1.00  0.00
ATOM   4199  O   LYN   525      75.217  59.222  76.241  1.00  0.00
ATOM   4200  N   GLN   526      74.003  61.051  75.777  1.00  0.00
ATOM   4201  CA  GLN   526      73.404  60.605  74.506  1.00  0.00
ATOM   4202  CB  GLN   526      72.245  61.448  73.965  1.00  0.00
ATOM   4203  CG  GLN   526      70.966  61.153  74.880  1.00  0.00
ATOM   4204  CD  GLN   526      69.692  61.947  74.553  1.00  0.00
ATOM   4205  OE1 GLN   526      69.582  62.985  73.919  1.00  0.00
ATOM   4206  NE2 GLN   526      68.539  61.518  75.074  1.00  0.00
ATOM   4207  C   GLN   526      74.415  60.229  73.400  1.00  0.00
ATOM   4208  O   GLN   526      74.263  59.215  72.733  1.00  0.00
ATOM   4209  N   THR   527      75.397  61.122  73.168  1.00  0.00
ATOM   4210  CA  THR   527      76.404  60.866  72.068  1.00  0.00
ATOM   4211  CB  THR   527      77.095  62.170  71.617  1.00  0.00
ATOM   4212  CG2 THR   527      76.124  63.216  71.092  1.00  0.00
ATOM   4213  OG1 THR   527      77.717  62.791  72.674  1.00  0.00
ATOM   4214  C   THR   527      77.445  59.830  72.473  1.00  0.00
ATOM   4215  O   THR   527      77.782  58.951  71.675  1.00  0.00
ATOM   4216  N   ALA   528      77.850  59.702  73.742  1.00  0.00
ATOM   4217  CA  ALA   528      78.697  58.583  74.256  1.00  0.00
ATOM   4218  CB  ALA   528      79.116  58.720  75.705  1.00  0.00
ATOM   4219  C   ALA   528      77.908  57.282  74.034  1.00  0.00
ATOM   4220  O   ALA   528      78.520  56.226  73.727  1.00  0.00
ATOM   4221  N   LEU   529      76.566  57.287  74.201  1.00  0.00
ATOM   4222  CA  LEU   529      75.724  56.142  73.969  1.00  0.00
ATOM   4223  CB  LEU   529      74.281  56.382  74.555  1.00  0.00
ATOM   4224  CG  LEU   529      73.358  55.214  74.473  1.00  0.00
ATOM   4225  CD1 LEU   529      73.892  53.847  74.946  1.00  0.00
ATOM   4226  CD2 LEU   529      72.027  55.475  75.222  1.00  0.00
ATOM   4227  C   LEU   529      75.638  55.745  72.490  1.00  0.00
ATOM   4228  O   LEU   529      75.800  54.560  72.245  1.00  0.00
ATOM   4229  N   VAL   530      75.425  56.667  71.563  1.00  0.00
ATOM   4230  CA  VAL   530      75.523  56.333  70.105  1.00  0.00
ATOM   4231  CB  VAL   530      75.241  57.510  69.109  1.00  0.00
ATOM   4232  CG1 VAL   530      75.561  57.124  67.663  1.00  0.00
ATOM   4233  CG2 VAL   530      73.772  57.875  69.096  1.00  0.00
ATOM   4234  C   VAL   530      76.804  55.699  69.706  1.00  0.00
ATOM   4235  O   VAL   530      76.840  54.650  69.030  1.00  0.00
ATOM   4236  N   GLU   531      77.860  56.280  70.201  1.00  0.00
ATOM   4237  CA  GLU   531      79.242  55.634  70.135  1.00  0.00
ATOM   4238  CB  GLU   531      80.272  56.729  70.489  1.00  0.00
ATOM   4239  CG  GLU   531      80.414  57.857  69.454  1.00  0.00
ATOM   4240  CD  GLU   531      80.857  57.502  68.018  1.00  0.00
ATOM   4241  OE1 GLU   531      80.555  58.334  67.098  1.00  0.00
ATOM   4242  OE2 GLU   531      81.533  56.467  67.804  1.00  0.00
ATOM   4243  C   GLU   531      79.396  54.195  70.766  1.00  0.00
ATOM   4244  O   GLU   531      80.094  53.339  70.214  1.00  0.00
ATOM   4245  N   LEU   532      78.701  53.920  71.856  1.00  0.00
ATOM   4246  CA  LEU   532      78.614  52.637  72.565  1.00  0.00
ATOM   4247  CB  LEU   532      78.251  52.870  74.080  1.00  0.00
ATOM   4248  CG  LEU   532      78.014  51.598  74.898  1.00  0.00
ATOM   4249  CD1 LEU   532      79.295  50.786  74.963  1.00  0.00
ATOM   4250  CD2 LEU   532      77.605  52.135  76.334  1.00  0.00
ATOM   4251  C   LEU   532      77.873  51.644  71.727  1.00  0.00
ATOM   4252  O   LEU   532      78.316  50.519  71.609  1.00  0.00
ATOM   4253  N   VAL   533      76.838  52.051  71.074  1.00  0.00
ATOM   4254  CA  VAL   533      75.943  51.180  70.201  1.00  0.00
ATOM   4255  CB  VAL   533      74.524  51.850  70.071  1.00  0.00
ATOM   4256  CG1 VAL   533      73.644  51.046  69.151  1.00  0.00
ATOM   4257  CG2 VAL   533      73.793  51.869  71.420  1.00  0.00
ATOM   4258  C   VAL   533      76.593  50.783  68.867  1.00  0.00
ATOM   4259  O   VAL   533      76.561  49.612  68.518  1.00  0.00
ATOM   4260  N   LYS   534      77.295  51.749  68.225  1.00  0.00
ATOM   4261  CA  LYS   534      78.058  51.508  67.036  1.00  0.00
ATOM   4262  CB  LYS   534      78.534  52.784  66.410  1.00  0.00
ATOM   4263  CG  LYS   534      77.480  53.654  65.674  1.00  0.00
ATOM   4264  CD  LYS   534      78.125  54.950  65.089  1.00  0.00
ATOM   4265  CE  LYS   534      76.976  55.902  64.661  1.00  0.00
ATOM   4266  NZ  LYS   534      77.470  57.092  63.915  1.00  0.00
ATOM   4267  C   LYS   534      79.258  50.602  67.285  1.00  0.00
ATOM   4268  O   LYS   534      79.514  49.687  66.488  1.00  0.00
ATOM   4269  N   HID   535      79.880  50.565  68.499  1.00  0.00
ATOM   4270  CA  HID   535      80.767  49.492  69.026  1.00  0.00
ATOM   4271  CB  HID   535      81.544  50.111  70.210  1.00  0.00
ATOM   4272  CG  HID   535      82.425  49.120  70.898  1.00  0.00
ATOM   4273  ND1 HID   535      83.670  48.593  70.481  1.00  0.00
ATOM   4274  CE1 HID   535      84.186  47.788  71.483  1.00  0.00
ATOM   4275  NE2 HID   535      83.272  47.723  72.495  1.00  0.00
ATOM   4276  CD2 HID   535      82.219  48.598  72.153  1.00  0.00
ATOM   4277  C   HID   535      80.083  48.212  69.493  1.00  0.00
ATOM   4278  O   HID   535      80.665  47.095  69.491  1.00  0.00
ATOM   4279  N   LYS   536      78.783  48.230  69.952  1.00  0.00
ATOM   4280  CA  LYS   536      77.987  47.038  70.208  1.00  0.00
ATOM   4281  CB  LYS   536      77.715  46.837  71.783  1.00  0.00
ATOM   4282  CG  LYS   536      78.923  46.905  72.701  1.00  0.00
ATOM   4283  CD  LYS   536      79.867  45.732  72.414  1.00  0.00
ATOM   4284  CE  LYS   536      80.804  45.651  73.660  1.00  0.00
ATOM   4285  NZ  LYS   536      81.806  44.577  73.638  1.00  0.00
ATOM   4286  C   LYS   536      76.692  46.892  69.453  1.00  0.00
ATOM   4287  O   LYS   536      75.617  47.218  69.972  1.00  0.00
ATOM   4288  N   PRO   537      76.731  46.579  68.137  1.00  0.00
ATOM   4289  CD  PRO   537      77.838  46.145  67.260  1.00  0.00
ATOM   4290  CG  PRO   537      77.297  45.927  65.919  1.00  0.00
ATOM   4291  CB  PRO   537      75.935  46.591  65.919  1.00  0.00
ATOM   4292  CA  PRO   537      75.583  46.622  67.424  1.00  0.00
ATOM   4293  C   PRO   537      74.467  45.620  67.772  1.00  0.00
ATOM   4294  O   PRO   537      73.297  45.737  67.374  1.00  0.00
ATOM   4295  N   LYS   538      74.819  44.604  68.538  1.00  0.00
ATOM   4296  CA  LYS   538      73.894  43.633  69.125  1.00  0.00
ATOM   4297  CB  LYS   538      74.683  42.264  69.289  1.00  0.00
ATOM   4298  CG  LYS   538      75.259  41.704  68.054  1.00  0.00
ATOM   4299  CD  LYS   538      74.418  41.633  66.807  1.00  0.00
ATOM   4300  CE  LYS   538      75.001  41.040  65.517  1.00  0.00
ATOM   4301  NZ  LYS   538      74.913  39.570  65.552  1.00  0.00
ATOM   4302  C   LYS   538      73.208  44.068  70.453  1.00  0.00
ATOM   4303  O   LYS   538      72.409  43.329  70.967  1.00  0.00
ATOM   4304  N   ALA   539      73.462  45.262  70.921  1.00  0.00
ATOM   4305  CA  ALA   539      72.809  45.989  72.065  1.00  0.00
ATOM   4306  CB  ALA   539      73.326  47.438  72.130  1.00  0.00
ATOM   4307  C   ALA   539      71.319  46.098  71.984  1.00  0.00
ATOM   4308  O   ALA   539      70.812  46.236  70.879  1.00  0.00
ATOM   4309  N   THR   540      70.691  46.138  73.177  1.00  0.00
ATOM   4310  CA  THR   540      69.187  46.115  73.251  1.00  0.00
ATOM   4311  CB  THR   540      68.552  44.756  73.575  1.00  0.00
ATOM   4312  CG2 THR   540      68.966  43.614  72.630  1.00  0.00
ATOM   4313  OG1 THR   540      68.892  44.417  74.914  1.00  0.00
ATOM   4314  C   THR   540      68.684  47.102  74.318  1.00  0.00
ATOM   4315  O   THR   540      69.372  47.633  75.200  1.00  0.00
ATOM   4316  N   LYS   541      67.496  47.630  74.004  1.00  0.00
ATOM   4317  CA  LYS   541      66.954  48.819  74.787  1.00  0.00
ATOM   4318  CB  LYS   541      65.745  49.322  74.078  1.00  0.00
ATOM   4319  CG  LYS   541      64.582  48.368  74.094  1.00  0.00
ATOM   4320  CD  LYS   541      63.374  48.972  73.294  1.00  0.00
ATOM   4321  CE  LYS   541      62.135  48.075  73.218  1.00  0.00
ATOM   4322  NZ  LYS   541      61.766  47.572  74.508  1.00  0.00
ATOM   4323  C   LYS   541      66.778  48.544  76.267  1.00  0.00
ATOM   4324  O   LYS   541      66.735  49.515  77.004  1.00  0.00
ATOM   4325  N   GLU   542      66.666  47.287  76.679  1.00  0.00
ATOM   4326  CA  GLU   542      66.475  46.857  78.062  1.00  0.00
ATOM   4327  CB  GLU   542      65.739  45.486  78.096  1.00  0.00
ATOM   4328  CG  GLU   542      64.283  45.502  77.442  1.00  0.00
ATOM   4329  CD  GLU   542      64.349  45.275  75.961  1.00  0.00
ATOM   4330  OE1 GLU   542      65.424  44.970  75.382  1.00  0.00
ATOM   4331  OE2 GLU   542      63.279  45.487  75.398  1.00  0.00
ATOM   4332  C   GLU   542      67.719  46.918  79.000  1.00  0.00
ATOM   4333  O   GLU   542      67.612  46.799  80.230  1.00  0.00
ATOM   4334  N   GLN   543      68.920  47.072  78.439  1.00  0.00
ATOM   4335  CA  GLN   543      70.209  47.102  79.053  1.00  0.00
ATOM   4336  CB  GLN   543      71.247  46.791  78.014  1.00  0.00
ATOM   4337  CG  GLN   543      71.102  45.387  77.360  1.00  0.00
ATOM   4338  CD  GLN   543      72.036  45.059  76.296  1.00  0.00
ATOM   4339  OE1 GLN   543      72.397  45.860  75.446  1.00  0.00
ATOM   4340  NE2 GLN   543      72.531  43.817  76.255  1.00  0.00
ATOM   4341  C   GLN   543      70.540  48.469  79.743  1.00  0.00
ATOM   4342  O   GLN   543      71.335  48.573  80.668  1.00  0.00
ATOM   4343  N   LEU   544      69.785  49.544  79.247  1.00  0.00
ATOM   4344  CA  LEU   544      70.218  50.943  79.499  1.00  0.00
ATOM   4345  CB  LEU   544      69.259  51.887  78.657  1.00  0.00
ATOM   4346  CG  LEU   544      69.243  51.677  77.075  1.00  0.00
ATOM   4347  CD1 LEU   544      68.027  52.391  76.399  1.00  0.00
ATOM   4348  CD2 LEU   544      70.578  52.168  76.573  1.00  0.00
ATOM   4349  C   LEU   544      70.150  51.270  80.984  1.00  0.00
ATOM   4350  O   LEU   544      70.985  52.006  81.465  1.00  0.00
ATOM   4351  N   LYS   545      69.185  50.628  81.632  1.00  0.00
ATOM   4352  CA  LYS   545      68.978  50.727  83.094  1.00  0.00
ATOM   4353  CB  LYS   545      67.667  50.088  83.412  1.00  0.00
ATOM   4354  CG  LYS   545      67.551  48.547  83.339  1.00  0.00
ATOM   4355  CD  LYS   545      66.132  48.183  83.519  1.00  0.00
ATOM   4356  CE  LYS   545      65.893  46.657  83.269  1.00  0.00
ATOM   4357  NZ  LYS   545      65.270  46.021  84.439  1.00  0.00
ATOM   4358  C   LYS   545      70.077  50.057  84.001  1.00  0.00
ATOM   4359  O   LYS   545      69.943  50.013  85.210  1.00  0.00
ATOM   4360  N   ALA   546      71.144  49.543  83.438  1.00  0.00
ATOM   4361  CA  ALA   546      72.346  49.000  84.143  1.00  0.00
ATOM   4362  CB  ALA   546      72.286  47.569  83.815  1.00  0.00
ATOM   4363  C   ALA   546      73.736  49.649  83.869  1.00  0.00
ATOM   4364  O   ALA   546      74.797  49.111  84.314  1.00  0.00
ATOM   4365  N   VAL   547      73.655  50.774  83.194  1.00  0.00
ATOM   4366  CA  VAL   547      74.828  51.674  83.066  1.00  0.00
ATOM   4367  CB  VAL   547      75.644  51.230  81.867  1.00  0.00
ATOM   4368  CG1 VAL   547      74.995  51.435  80.412  1.00  0.00
ATOM   4369  CG2 VAL   547      77.017  51.949  81.775  1.00  0.00
ATOM   4370  C   VAL   547      74.455  53.165  83.017  1.00  0.00
ATOM   4371  O   VAL   547      75.290  53.970  83.467  1.00  0.00
ATOM   4372  N   MET   548      73.312  53.530  82.461  1.00  0.00
ATOM   4373  CA  MET   548      73.046  54.905  82.088  1.00  0.00
ATOM   4374  CB  MET   548      71.955  54.937  80.930  1.00  0.00
ATOM   4375  CG  MET   548      72.511  54.251  79.653  1.00  0.00
ATOM   4376  SD  MET   548      74.037  54.942  78.971  1.00  0.00
ATOM   4377  CE  MET   548      73.641  56.769  78.573  1.00  0.00
ATOM   4378  C   MET   548      72.753  55.738  83.351  1.00  0.00
ATOM   4379  O   MET   548      73.306  56.849  83.412  1.00  0.00
ATOM   4380  N   ASP   549      72.193  55.154  84.389  1.00  0.00
ATOM   4381  CA  ASP   549      72.049  55.800  85.691  1.00  0.00
ATOM   4382  CB  ASP   549      70.918  55.190  86.546  1.00  0.00
ATOM   4383  CG  ASP   549      69.802  54.544  85.789  1.00  0.00
ATOM   4384  OD1 ASP   549      69.127  55.191  84.970  1.00  0.00
ATOM   4385  OD2 ASP   549      69.665  53.327  86.024  1.00  0.00
ATOM   4386  C   ASP   549      73.337  55.946  86.522  1.00  0.00
ATOM   4387  O   ASP   549      73.369  56.785  87.472  1.00  0.00
ATOM   4388  N   ASP   550      74.418  55.215  86.173  1.00  0.00
ATOM   4389  CA  ASP   550      75.754  55.442  86.737  1.00  0.00
ATOM   4390  CB  ASP   550      76.678  54.182  86.677  1.00  0.00
ATOM   4391  CG  ASP   550      76.007  52.825  87.005  1.00  0.00
ATOM   4392  OD1 ASP   550      74.865  52.737  87.471  1.00  0.00
ATOM   4393  OD2 ASP   550      76.779  51.871  87.036  1.00  0.00
ATOM   4394  C   ASP   550      76.424  56.610  86.051  1.00  0.00
ATOM   4395  O   ASP   550      77.007  57.441  86.725  1.00  0.00
ATOM   4396  N   PHE   551      76.252  56.786  84.724  1.00  0.00
ATOM   4397  CA  PHE   551      76.721  57.902  83.898  1.00  0.00
ATOM   4398  CB  PHE   551      76.336  57.593  82.425  1.00  0.00
ATOM   4399  CG  PHE   551      77.316  57.972  81.386  1.00  0.00
ATOM   4400  CD1 PHE   551      78.169  59.114  81.490  1.00  0.00
ATOM   4401  CE1 PHE   551      78.795  59.684  80.363  1.00  0.00
ATOM   4402  CZ  PHE   551      78.654  59.135  79.086  1.00  0.00
ATOM   4403  CE2 PHE   551      77.907  57.897  79.008  1.00  0.00
ATOM   4404  CD2 PHE   551      77.153  57.405  80.074  1.00  0.00
ATOM   4405  C   PHE   551      76.101  59.279  84.371  1.00  0.00
ATOM   4406  O   PHE   551      76.731  60.288  84.551  1.00  0.00
ATOM   4407  N   ALA   552      74.798  59.231  84.711  1.00  0.00
ATOM   4408  CA  ALA   552      74.068  60.369  85.269  1.00  0.00
ATOM   4409  CB  ALA   552      72.661  59.763  85.607  1.00  0.00
ATOM   4410  C   ALA   552      74.722  60.881  86.566  1.00  0.00
ATOM   4411  O   ALA   552      74.699  62.100  86.892  1.00  0.00
ATOM   4412  N   ALA   553      75.456  60.040  87.319  1.00  0.00
ATOM   4413  CA  ALA   553      76.290  60.360  88.456  1.00  0.00
ATOM   4414  CB  ALA   553      76.255  59.114  89.441  1.00  0.00
ATOM   4415  C   ALA   553      77.736  60.825  87.992  1.00  0.00
ATOM   4416  O   ALA   553      78.262  61.738  88.600  1.00  0.00
ATOM   4417  N   PHE   554      78.261  60.258  86.934  1.00  0.00
ATOM   4418  CA  PHE   554      79.597  60.546  86.366  1.00  0.00
ATOM   4419  CB  PHE   554      80.095  59.395  85.529  1.00  0.00
ATOM   4420  CG  PHE   554      81.634  59.446  85.158  1.00  0.00
ATOM   4421  CD1 PHE   554      82.217  60.126  84.074  1.00  0.00
ATOM   4422  CE1 PHE   554      83.569  60.267  83.904  1.00  0.00
ATOM   4423  CZ  PHE   554      84.441  59.786  84.905  1.00  0.00
ATOM   4424  CE2 PHE   554      83.942  59.171  86.039  1.00  0.00
ATOM   4425  CD2 PHE   554      82.531  58.904  86.121  1.00  0.00
ATOM   4426  C   PHE   554      79.644  61.839  85.575  1.00  0.00
ATOM   4427  O   PHE   554      80.759  62.327  85.380  1.00  0.00
ATOM   4428  N   VAL   555      78.548  62.452  85.115  1.00  0.00
ATOM   4429  CA  VAL   555      78.563  63.853  84.647  1.00  0.00
ATOM   4430  CB  VAL   555      77.429  64.053  83.635  1.00  0.00
ATOM   4431  CG1 VAL   555      77.353  63.102  82.386  1.00  0.00
ATOM   4432  CG2 VAL   555      76.090  64.032  84.324  1.00  0.00
ATOM   4433  C   VAL   555      78.678  64.940  85.731  1.00  0.00
ATOM   4434  O   VAL   555      78.813  66.145  85.474  1.00  0.00
ATOM   4435  N   GLU   556      78.646  64.514  86.954  1.00  0.00
ATOM   4436  CA  GLU   556      78.934  65.285  88.209  1.00  0.00
ATOM   4437  CB  GLU   556      77.752  65.314  89.169  1.00  0.00
ATOM   4438  CG  GLU   556      77.967  66.187  90.478  1.00  0.00
ATOM   4439  CD  GLU   556      78.096  67.690  90.197  1.00  0.00
ATOM   4440  OE1 GLU   556      78.397  68.461  91.173  1.00  0.00
ATOM   4441  OE2 GLU   556      77.906  68.138  89.029  1.00  0.00
ATOM   4442  C   GLU   556      80.230  64.807  88.915  1.00  0.00
ATOM   4443  O   GLU   556      81.080  65.626  89.241  1.00  0.00
ATOM   4444  N   LYS   557      80.393  63.489  89.147  1.00  0.00
ATOM   4445  CA  LYS   557      81.372  62.980  90.158  1.00  0.00
ATOM   4446  CB  LYS   557      81.574  61.475  89.883  1.00  0.00
ATOM   4447  CG  LYS   557      82.389  60.592  90.805  1.00  0.00
ATOM   4448  CD  LYS   557      82.085  59.074  90.750  1.00  0.00
ATOM   4449  CE  LYS   557      82.352  58.571  92.203  1.00  0.00
ATOM   4450  NZ  LYS   557      82.471  57.135  92.095  1.00  0.00
ATOM   4451  C   LYS   557      82.745  63.653  90.148  1.00  0.00
ATOM   4452  O   LYS   557      83.244  64.153  91.179  1.00  0.00
ATOM   4453  N   CYX   558      83.458  63.686  89.076  1.00  0.00
ATOM   4454  CA  CYX   558      84.868  64.095  89.065  1.00  0.00
ATOM   4455  CB  CYX   558      85.542  63.238  87.967  1.00  0.00
ATOM   4456  SG  CYX   558      85.710  61.468  88.390  1.00  0.00
ATOM   4457  C   CYX   558      85.011  65.625  88.743  1.00  0.00
ATOM   4458  O   CYX   558      86.025  66.183  89.144  1.00  0.00
ATOM   4459  N   CYX   559      84.011  66.312  88.213  1.00  0.00
ATOM   4460  CA  CYX   559      83.911  67.744  88.531  1.00  0.00
ATOM   4461  CB  CYX   559      82.780  68.405  87.686  1.00  0.00
ATOM   4462  SG  CYX   559      82.345  67.698  86.010  1.00  0.00
ATOM   4463  C   CYX   559      83.779  68.146  89.992  1.00  0.00
ATOM   4464  O   CYX   559      84.095  69.315  90.337  1.00  0.00
ATOM   4465  N   LYS   560      83.177  67.248  90.764  1.00  0.00
ATOM   4466  CA  LYS   560      83.005  67.479  92.165  1.00  0.00
ATOM   4467  CB  LYS   560      81.591  67.012  92.555  1.00  0.00
ATOM   4468  CG  LYS   560      81.027  67.689  93.866  1.00  0.00
ATOM   4469  CD  LYS   560      79.632  67.083  94.190  1.00  0.00
ATOM   4470  CE  LYS   560      78.908  67.766  95.398  1.00  0.00
ATOM   4471  NZ  LYS   560      77.445  67.589  95.290  1.00  0.00
ATOM   4472  C   LYS   560      84.164  66.927  93.099  1.00  0.00
ATOM   4473  O   LYS   560      84.247  67.377  94.257  1.00  0.00
ATOM   4474  N   ALA   561      85.112  66.097  92.604  1.00  0.00
ATOM   4475  CA  ALA   561      86.403  65.730  93.393  1.00  0.00
ATOM   4476  CB  ALA   561      87.117  64.499  92.806  1.00  0.00
ATOM   4477  C   ALA   561      87.394  66.974  93.538  1.00  0.00
ATOM   4478  O   ALA   561      87.309  67.894  92.706  1.00  0.00
ATOM   4479  N   ASP   562      88.385  66.933  94.409  1.00  0.00
ATOM   4480  CA  ASP   562      89.591  67.757  94.249  1.00  0.00
ATOM   4481  CB  ASP   562      90.197  67.948  95.717  1.00  0.00
ATOM   4482  CG  ASP   562      89.196  68.507  96.709  1.00  0.00
ATOM   4483  OD1 ASP   562      88.478  69.447  96.402  1.00  0.00
ATOM   4484  OD2 ASP   562      89.325  68.037  97.869  1.00  0.00
ATOM   4485  C   ASP   562      90.652  67.176  93.200  1.00  0.00
ATOM   4486  O   ASP   562      91.158  67.888  92.368  1.00  0.00
ATOM   4487  N   ASP   563      90.853  65.861  93.272  1.00  0.00
ATOM   4488  CA  ASP   563      91.780  65.137  92.399  1.00  0.00
ATOM   4489  CB  ASP   563      92.296  63.829  93.001  1.00  0.00
ATOM   4490  CG  ASP   563      91.318  62.823  93.502  1.00  0.00
ATOM   4491  OD1 ASP   563      91.767  61.646  93.612  1.00  0.00
ATOM   4492  OD2 ASP   563      90.146  63.092  93.772  1.00  0.00
ATOM   4493  C   ASP   563      91.114  64.864  91.083  1.00  0.00
ATOM   4494  O   ASP   563      90.997  63.710  90.650  1.00  0.00
ATOM   4495  N   LYS   564      90.595  65.853  90.389  1.00  0.00
ATOM   4496  CA  LYS   564      89.769  65.868  89.212  1.00  0.00
ATOM   4497  CB  LYS   564      89.465  67.355  88.848  1.00  0.00
ATOM   4498  CG  LYS   564      88.611  68.057  89.829  1.00  0.00
ATOM   4499  CD  LYS   564      87.931  69.393  89.483  1.00  0.00
ATOM   4500  CE  LYS   564      86.937  69.888  90.456  1.00  0.00
ATOM   4501  NZ  LYS   564      87.400  70.469  91.666  1.00  0.00
ATOM   4502  C   LYS   564      90.502  65.070  88.151  1.00  0.00
ATOM   4503  O   LYS   564      89.987  64.087  87.671  1.00  0.00
ATOM   4504  N   GLU   565      91.691  65.517  87.800  1.00  0.00
ATOM   4505  CA  GLU   565      92.441  64.992  86.598  1.00  0.00
ATOM   4506  CB  GLU   565      93.688  65.832  86.281  1.00  0.00
ATOM   4507  CG  GLU   565      94.638  65.303  85.090  1.00  0.00
ATOM   4508  CD  GLU   565      95.695  66.373  84.782  1.00  0.00
ATOM   4509  OE1 GLU   565      95.800  66.635  83.553  1.00  0.00
ATOM   4510  OE2 GLU   565      96.412  66.855  85.680  1.00  0.00
ATOM   4511  C   GLU   565      92.732  63.497  86.687  1.00  0.00
ATOM   4512  O   GLU   565      92.625  62.802  85.635  1.00  0.00
ATOM   4513  N   THR   566      92.936  62.950  87.900  1.00  0.00
ATOM   4514  CA  THR   566      93.017  61.503  88.145  1.00  0.00
ATOM   4515  CB  THR   566      93.814  61.404  89.438  1.00  0.00
ATOM   4516  CG2 THR   566      93.847  59.925  89.724  1.00  0.00
ATOM   4517  OG1 THR   566      95.087  61.930  89.274  1.00  0.00
ATOM   4518  C   THR   566      91.715  60.773  88.193  1.00  0.00
ATOM   4519  O   THR   566      91.475  59.690  87.568  1.00  0.00
ATOM   4520  N   CYX   567      90.686  61.469  88.673  1.00  0.00
ATOM   4521  CA  CYX   567      89.336  60.950  88.854  1.00  0.00
ATOM   4522  CB  CYX   567      88.463  61.951  89.599  1.00  0.00
ATOM   4523  SG  CYX   567      86.787  61.495  90.081  1.00  0.00
ATOM   4524  C   CYX   567      88.774  60.537  87.484  1.00  0.00
ATOM   4525  O   CYX   567      88.272  59.430  87.369  1.00  0.00
ATOM   4526  N   PHE   568      88.949  61.444  86.450  1.00  0.00
ATOM   4527  CA  PHE   568      88.480  61.126  85.061  1.00  0.00
ATOM   4528  CB  PHE   568      88.460  62.410  84.150  1.00  0.00
ATOM   4529  CG  PHE   568      87.679  63.557  84.705  1.00  0.00
ATOM   4530  CD1 PHE   568      86.243  63.610  84.673  1.00  0.00
ATOM   4531  CE1 PHE   568      85.590  64.847  85.159  1.00  0.00
ATOM   4532  CZ  PHE   568      86.412  65.857  85.721  1.00  0.00
ATOM   4533  CE2 PHE   568      87.781  65.753  85.624  1.00  0.00
ATOM   4534  CD2 PHE   568      88.390  64.602  85.150  1.00  0.00
ATOM   4535  C   PHE   568      89.087  59.876  84.460  1.00  0.00
ATOM   4536  O   PHE   568      88.598  59.304  83.477  1.00  0.00
ATOM   4537  N   ALA   569      90.237  59.396  84.911  1.00  0.00
ATOM   4538  CA  ALA   569      90.944  58.168  84.389  1.00  0.00
ATOM   4539  CB  ALA   569      92.441  58.447  84.145  1.00  0.00
ATOM   4540  C   ALA   569      90.692  56.943  85.305  1.00  0.00
ATOM   4541  O   ALA   569      90.887  55.859  84.781  1.00  0.00
ATOM   4542  N   GLU   570      90.232  57.118  86.542  1.00  0.00
ATOM   4543  CA  GLU   570      90.228  56.064  87.601  1.00  0.00
ATOM   4544  CB  GLU   570      90.946  56.557  88.865  1.00  0.00
ATOM   4545  CG  GLU   570      92.502  56.376  88.698  1.00  0.00
ATOM   4546  CD  GLU   570      93.053  54.963  88.646  1.00  0.00
ATOM   4547  OE1 GLU   570      93.110  54.223  89.677  1.00  0.00
ATOM   4548  OE2 GLU   570      93.255  54.466  87.494  1.00  0.00
ATOM   4549  C   GLU   570      88.777  55.603  87.905  1.00  0.00
ATOM   4550  O   GLU   570      88.436  54.439  87.825  1.00  0.00
ATOM   4551  N   GLU   571      87.849  56.558  88.027  1.00  0.00
ATOM   4552  CA  GLU   571      86.371  56.299  88.034  1.00  0.00
ATOM   4553  CB  GLU   571      85.711  57.405  88.824  1.00  0.00
ATOM   4554  CG  GLU   571      86.093  57.426  90.316  1.00  0.00
ATOM   4555  CD  GLU   571      85.706  56.130  90.987  1.00  0.00
ATOM   4556  OE1 GLU   571      86.571  55.465  91.554  1.00  0.00
ATOM   4557  OE2 GLU   571      84.472  55.806  91.005  1.00  0.00
ATOM   4558  C   GLU   571      85.894  56.345  86.561  1.00  0.00
ATOM   4559  O   GLU   571      84.984  55.588  86.285  1.00  0.00
ATOM   4560  N   GLY   572      86.512  57.042  85.610  1.00  0.00
ATOM   4561  CA  GLY   572      86.297  56.944  84.192  1.00  0.00
ATOM   4562  C   GLY   572      86.609  55.498  83.666  1.00  0.00
ATOM   4563  O   GLY   572      85.850  54.863  83.032  1.00  0.00
ATOM   4564  N   LYS   573      87.772  54.922  84.011  1.00  0.00
ATOM   4565  CA  LYS   573      88.232  53.501  83.934  1.00  0.00
ATOM   4566  CB  LYS   573      89.536  53.356  84.666  1.00  0.00
ATOM   4567  CG  LYS   573      90.075  51.930  84.922  1.00  0.00
ATOM   4568  CD  LYS   573      91.434  51.771  85.598  1.00  0.00
ATOM   4569  CE  LYS   573      92.544  52.289  84.641  1.00  0.00
ATOM   4570  NZ  LYS   573      93.812  52.545  85.396  1.00  0.00
ATOM   4571  C   LYS   573      87.171  52.457  84.422  1.00  0.00
ATOM   4572  O   LYS   573      87.038  51.441  83.715  1.00  0.00
ATOM   4573  N   LYS   574      86.388  52.701  85.489  1.00  0.00
ATOM   4574  CA  LYS   574      85.313  51.881  85.995  1.00  0.00
ATOM   4575  CB  LYS   574      84.973  52.132  87.452  1.00  0.00
ATOM   4576  CG  LYS   574      86.135  51.637  88.371  1.00  0.00
ATOM   4577  CD  LYS   574      85.877  52.203  89.749  1.00  0.00
ATOM   4578  CE  LYS   574      87.031  51.835  90.670  1.00  0.00
ATOM   4579  NZ  LYS   574      87.096  52.745  91.869  1.00  0.00
ATOM   4580  C   LYS   574      84.131  52.006  85.065  1.00  0.00
ATOM   4581  O   LYS   574      83.547  50.972  84.672  1.00  0.00
ATOM   4582  N   LEU   575      83.736  53.265  84.725  1.00  0.00
ATOM   4583  CA  LEU   575      82.508  53.438  83.906  1.00  0.00
ATOM   4584  CB  LEU   575      82.105  54.918  83.942  1.00  0.00
ATOM   4585  CG  LEU   575      81.035  55.284  82.987  1.00  0.00
ATOM   4586  CD1 LEU   575      79.678  54.570  83.207  1.00  0.00
ATOM   4587  CD2 LEU   575      80.692  56.767  83.035  1.00  0.00
ATOM   4588  C   LEU   575      82.794  52.974  82.458  1.00  0.00
ATOM   4589  O   LEU   575      81.978  52.307  81.834  1.00  0.00
ATOM   4590  N   VAL   576      84.059  53.085  82.002  1.00  0.00
ATOM   4591  CA  VAL   576      84.458  52.453  80.750  1.00  0.00
ATOM   4592  CB  VAL   576      85.861  52.901  80.234  1.00  0.00
ATOM   4593  CG1 VAL   576      86.434  52.182  79.019  1.00  0.00
ATOM   4594  CG2 VAL   576      85.796  54.368  79.797  1.00  0.00
ATOM   4595  C   VAL   576      84.257  50.939  80.752  1.00  0.00
ATOM   4596  O   VAL   576      83.520  50.344  79.946  1.00  0.00
ATOM   4597  N   ALA   577      84.769  50.269  81.811  1.00  0.00
ATOM   4598  CA  ALA   577      84.822  48.808  81.925  1.00  0.00
ATOM   4599  CB  ALA   577      85.797  48.474  83.051  1.00  0.00
ATOM   4600  C   ALA   577      83.436  48.103  82.140  1.00  0.00
ATOM   4601  O   ALA   577      83.209  46.941  81.830  1.00  0.00
ATOM   4602  N   ALA   578      82.492  48.905  82.721  1.00  0.00
ATOM   4603  CA  ALA   578      81.098  48.613  82.714  1.00  0.00
ATOM   4604  CB  ALA   578      80.435  49.386  83.854  1.00  0.00
ATOM   4605  C   ALA   578      80.459  48.755  81.326  1.00  0.00
ATOM   4606  O   ALA   578      79.869  47.812  80.760  1.00  0.00
ATOM   4607  N   SER   579      80.597  49.938  80.695  1.00  0.00
ATOM   4608  CA  SER   579      79.923  50.271  79.413  1.00  0.00
ATOM   4609  CB  SER   579      80.323  51.732  78.967  1.00  0.00
ATOM   4610  OG  SER   579      80.020  52.750  79.866  1.00  0.00
ATOM   4611  C   SER   579      80.093  49.253  78.258  1.00  0.00
ATOM   4612  O   SER   579      79.115  48.913  77.629  1.00  0.00
ATOM   4613  N   GLN   580      81.303  48.773  78.052  1.00  0.00
ATOM   4614  CA  GLN   580      81.558  47.830  76.922  1.00  0.00
ATOM   4615  CB  GLN   580      83.013  48.061  76.399  1.00  0.00
ATOM   4616  CG  GLN   580      83.475  49.437  76.006  1.00  0.00
ATOM   4617  CD  GLN   580      85.028  49.398  75.724  1.00  0.00
ATOM   4618  OE1 GLN   580      85.813  50.077  76.343  1.00  0.00
ATOM   4619  NE2 GLN   580      85.394  48.640  74.667  1.00  0.00
ATOM   4620  C   GLN   580      81.274  46.330  77.295  1.00  0.00
ATOM   4621  O   GLN   580      81.555  45.444  76.534  1.00  0.00
ATOM   4622  N   ALA   581      80.588  46.137  78.443  1.00  0.00
ATOM   4623  CA  ALA   581      80.079  44.884  79.021  1.00  0.00
ATOM   4624  CB  ALA   581      80.950  44.609  80.306  1.00  0.00
ATOM   4625  C   ALA   581      78.597  44.889  79.301  1.00  0.00
ATOM   4626  O   ALA   581      77.867  43.986  78.973  1.00  0.00
ATOM   4627  N   ALA   582      78.106  45.996  79.919  1.00  0.00
ATOM   4628  CA  ALA   582      76.663  46.050  80.168  1.00  0.00
ATOM   4629  CB  ALA   582      76.555  47.468  80.928  1.00  0.00
ATOM   4630  C   ALA   582      75.799  46.110  78.874  1.00  0.00
ATOM   4631  O   ALA   582      74.685  45.633  78.879  1.00  0.00
ATOM   4632  N   LEU   583      76.345  46.637  77.738  1.00  0.00
ATOM   4633  CA  LEU   583      75.677  46.650  76.420  1.00  0.00
ATOM   4634  CB  LEU   583      75.676  48.051  75.809  1.00  0.00
ATOM   4635  CG  LEU   583      74.404  48.799  76.095  1.00  0.00
ATOM   4636  CD1 LEU   583      74.461  49.377  77.509  1.00  0.00
ATOM   4637  CD2 LEU   583      74.092  50.008  75.164  1.00  0.00
ATOM   4638  C   LEU   583      76.351  45.635  75.567  1.00  0.00
ATOM   4639  O   LEU   583      77.515  45.295  75.808  1.00  0.00
ATOM   4640  N   GLY   584      75.554  45.116  74.589  1.00  0.00
ATOM   4641  CA  GLY   584      75.938  44.134  73.582  1.00  0.00
ATOM   4642  C   GLY   584      75.222  42.715  73.700  1.00  0.00
ATOM   4643  O   GLY   584      74.068  42.512  74.092  1.00  0.00
ATOM   4644  N   LEU   585      75.864  41.646  73.155  1.00  0.00
ATOM   4645  CA  LEU   585      75.481  40.256  73.142  1.00  0.00
ATOM   4646  CB  LEU   585      75.009  39.778  71.737  1.00  0.00
ATOM   4647  CG  LEU   585      74.595  38.270  71.618  1.00  0.00
ATOM   4648  CD1 LEU   585      73.414  37.940  72.582  1.00  0.00
ATOM   4649  CD2 LEU   585      74.305  37.866  70.166  1.00  0.00
ATOM   4650  C   LEU   585      76.561  39.345  73.735  1.00  0.00
ATOM   4651  O   LEU   585      76.378  38.796  74.823  1.00  0.00
ATOM   4652  OXT LEU   585      77.641  39.323  73.175  1.00  0.00
ENDMDL
MODEL     2
ATOM      1  N   ASP     1      55.890  89.628  25.410  1.00  0.00
ATOM      2  CA  ASP     1      57.169  89.031  24.970  1.00  0.00
ATOM      3  CB  ASP     1      58.235  90.045  24.590  1.00  0.00
ATOM      4  CG  ASP     1      57.851  90.808  23.345  1.00  0.00
ATOM      5  OD1 ASP     1      56.695  90.746  22.888  1.00  0.00
ATOM      6  OD2 ASP     1      58.499  91.789  22.956  1.00  0.00
ATOM      7  C   ASP     1      57.602  87.952  25.976  1.00  0.00
ATOM      8  O   ASP     1      57.103  87.963  27.143  1.00  0.00
ATOM      9  N   ALA     2      58.391  86.910  25.591  1.00  0.00
ATOM     10  CA  ALA     2      58.344  85.687  26.388  1.00  0.00
ATOM     11  CB  ALA     2      58.939  84.621  25.422  1.00  0.00
ATOM     12  C   ALA     2      58.920  85.599  27.769  1.00  0.00
ATOM     13  O   ALA     2      58.512  84.664  28.523  1.00  0.00
ATOM     14  N   HIE     3      59.609  86.623  28.167  1.00  0.00
ATOM     15  CA  HIE     3      59.996  86.786  29.532  1.00  0.00
ATOM     16  CB  HIE     3      61.112  87.898  29.581  1.00  0.00
ATOM     17  CG  HIE     3      60.688  89.276  29.445  1.00  0.00
ATOM     18  ND1 HIE     3      59.973  89.776  28.360  1.00  0.00
ATOM     19  CE1 HIE     3      59.944  91.077  28.539  1.00  0.00
ATOM     20  NE2 HIE     3      60.519  91.437  29.713  1.00  0.00
ATOM     21  CD2 HIE     3      61.032  90.305  30.240  1.00  0.00
ATOM     22  C   HIE     3      58.820  87.327  30.456  1.00  0.00
ATOM     23  O   HIE     3      58.857  87.125  31.688  1.00  0.00
ATOM     24  N   LYS     4      57.806  88.011  29.889  1.00  0.00
ATOM     25  CA  LYS     4      56.707  88.556  30.648  1.00  0.00
ATOM     26  CB  LYS     4      55.782  87.442  31.142  1.00  0.00
ATOM     27  CG  LYS     4      55.163  86.647  29.936  1.00  0.00
ATOM     28  CD  LYS     4      54.102  85.653  30.323  1.00  0.00
ATOM     29  CE  LYS     4      54.549  84.398  31.164  1.00  0.00
ATOM     30  NZ  LYS     4      55.523  83.572  30.361  1.00  0.00
ATOM     31  C   LYS     4      57.087  89.590  31.722  1.00  0.00
ATOM     32  O   LYS     4      56.194  89.913  32.474  1.00  0.00
ATOM     33  N   SER     5      58.325  90.152  31.781  1.00  0.00
ATOM     34  CA  SER     5      58.857  91.073  32.849  1.00  0.00
ATOM     35  CB  SER     5      58.290  92.502  32.637  1.00  0.00
ATOM     36  OG  SER     5      58.869  93.027  31.457  1.00  0.00
ATOM     37  C   SER     5      58.575  90.526  34.282  1.00  0.00
ATOM     38  O   SER     5      58.121  91.376  35.130  1.00  0.00
ATOM     39  N   GLU     6      58.701  89.213  34.561  1.00  0.00
ATOM     40  CA  GLU     6      57.885  88.460  35.516  1.00  0.00
ATOM     41  CB  GLU     6      57.913  86.961  35.228  1.00  0.00
ATOM     42  CG  GLU     6      59.327  86.262  35.431  1.00  0.00
ATOM     43  CD  GLU     6      59.265  84.867  34.868  1.00  0.00
ATOM     44  OE1 GLU     6      60.320  84.271  34.541  1.00  0.00
ATOM     45  OE2 GLU     6      58.263  84.129  35.154  1.00  0.00
ATOM     46  C   GLU     6      58.104  88.913  36.944  1.00  0.00
ATOM     47  O   GLU     6      57.321  88.548  37.789  1.00  0.00
ATOM     48  N   VAL     7      59.198  89.670  37.232  1.00  0.00
ATOM     49  CA  VAL     7      59.672  90.020  38.557  1.00  0.00
ATOM     50  CB  VAL     7      61.130  90.529  38.533  1.00  0.00
ATOM     51  CG1 VAL     7      62.059  89.346  38.066  1.00  0.00
ATOM     52  CG2 VAL     7      61.273  91.782  37.649  1.00  0.00
ATOM     53  C   VAL     7      58.786  91.070  39.327  1.00  0.00
ATOM     54  O   VAL     7      58.490  90.833  40.496  1.00  0.00
ATOM     55  N   ALA     8      58.193  91.965  38.558  1.00  0.00
ATOM     56  CA  ALA     8      57.189  92.956  39.007  1.00  0.00
ATOM     57  CB  ALA     8      57.095  93.955  37.861  1.00  0.00
ATOM     58  C   ALA     8      55.861  92.286  39.421  1.00  0.00
ATOM     59  O   ALA     8      55.381  92.672  40.491  1.00  0.00
ATOM     60  N   HID     9      55.307  91.374  38.632  1.00  0.00
ATOM     61  CA  HID     9      54.095  90.609  39.039  1.00  0.00
ATOM     62  CB  HID     9      53.548  89.789  37.915  1.00  0.00
ATOM     63  CG  HID     9      52.170  89.410  38.159  1.00  0.00
ATOM     64  ND1 HID     9      51.409  89.492  39.326  1.00  0.00
ATOM     65  CE1 HID     9      50.160  89.173  39.057  1.00  0.00
ATOM     66  NE2 HID     9      50.046  88.837  37.743  1.00  0.00
ATOM     67  CD2 HID     9      51.374  88.913  37.202  1.00  0.00
ATOM     68  C   HID     9      54.397  89.703  40.299  1.00  0.00
ATOM     69  O   HID     9      53.586  89.583  41.156  1.00  0.00
ATOM     70  N   ARG    10      55.606  89.169  40.438  1.00  0.00
ATOM     71  CA  ARG    10      56.162  88.484  41.669  1.00  0.00
ATOM     72  CB  ARG    10      57.303  87.578  41.247  1.00  0.00
ATOM     73  CG  ARG    10      56.767  86.381  40.371  1.00  0.00
ATOM     74  CD  ARG    10      55.547  85.643  40.840  1.00  0.00
ATOM     75  NE  ARG    10      55.263  84.427  39.986  1.00  0.00
ATOM     76  CZ  ARG    10      54.322  83.555  40.156  1.00  0.00
ATOM     77  NH1 ARG    10      54.353  82.389  39.606  1.00  0.00
ATOM     78  NH2 ARG    10      53.287  83.682  40.975  1.00  0.00
ATOM     79  C   ARG    10      56.649  89.535  42.840  1.00  0.00
ATOM     80  O   ARG    10      57.157  89.096  43.866  1.00  0.00
ATOM     81  N   PHE    11      56.345  90.821  42.661  1.00  0.00
ATOM     82  CA  PHE    11      56.582  91.900  43.655  1.00  0.00
ATOM     83  CB  PHE    11      57.657  92.925  43.082  1.00  0.00
ATOM     84  CG  PHE    11      58.294  93.841  44.126  1.00  0.00
ATOM     85  CD1 PHE    11      59.600  93.547  44.564  1.00  0.00
ATOM     86  CE1 PHE    11      60.296  94.463  45.369  1.00  0.00
ATOM     87  CZ  PHE    11      59.549  95.628  45.815  1.00  0.00
ATOM     88  CE2 PHE    11      58.185  95.882  45.428  1.00  0.00
ATOM     89  CD2 PHE    11      57.576  94.996  44.504  1.00  0.00
ATOM     90  C   PHE    11      55.306  92.611  44.156  1.00  0.00
ATOM     91  O   PHE    11      55.234  92.852  45.323  1.00  0.00
ATOM     92  N   LYS    12      54.359  92.896  43.284  1.00  0.00
ATOM     93  CA  LYS    12      53.165  93.781  43.588  1.00  0.00
ATOM     94  CB  LYS    12      52.616  94.370  42.270  1.00  0.00
ATOM     95  CG  LYS    12      53.557  95.382  41.558  1.00  0.00
ATOM     96  CD  LYS    12      53.398  95.524  40.052  1.00  0.00
ATOM     97  CE  LYS    12      51.934  95.421  39.528  1.00  0.00
ATOM     98  NZ  LYS    12      51.770  95.206  38.062  1.00  0.00
ATOM     99  C   LYS    12      52.107  93.203  44.538  1.00  0.00
ATOM    100  O   LYS    12      51.267  94.043  45.014  1.00  0.00
ATOM    101  N   ASP    13      52.178  91.932  44.911  1.00  0.00
ATOM    102  CA  ASP    13      51.470  91.392  46.108  1.00  0.00
ATOM    103  CB  ASP    13      50.510  90.241  45.710  1.00  0.00
ATOM    104  CG  ASP    13      49.349  90.507  44.768  1.00  0.00
ATOM    105  OD1 ASP    13      49.184  91.715  44.389  1.00  0.00
ATOM    106  OD2 ASP    13      48.643  89.540  44.411  1.00  0.00
ATOM    107  C   ASP    13      52.412  90.746  47.135  1.00  0.00
ATOM    108  O   ASP    13      52.031  90.660  48.310  1.00  0.00
ATOM    109  N   LEU    14      53.660  90.425  46.791  1.00  0.00
ATOM    110  CA  LEU    14      54.628  89.761  47.733  1.00  0.00
ATOM    111  CB  LEU    14      55.659  88.982  46.927  1.00  0.00
ATOM    112  CG  LEU    14      56.456  87.958  47.730  1.00  0.00
ATOM    113  CD1 LEU    14      55.599  86.893  48.563  1.00  0.00
ATOM    114  CD2 LEU    14      57.342  87.041  46.805  1.00  0.00
ATOM    115  C   LEU    14      55.328  90.784  48.635  1.00  0.00
ATOM    116  O   LEU    14      55.342  90.639  49.878  1.00  0.00
ATOM    117  N   GLY    15      55.854  91.883  48.043  1.00  0.00
ATOM    118  CA  GLY    15      56.500  93.001  48.754  1.00  0.00
ATOM    119  C   GLY    15      57.981  92.788  49.045  1.00  0.00
ATOM    120  O   GLY    15      58.492  91.670  49.096  1.00  0.00
ATOM    121  N   GLU    16      58.691  93.910  49.240  1.00  0.00
ATOM    122  CA  GLU    16      60.136  93.943  49.515  1.00  0.00
ATOM    123  CB  GLU    16      60.505  95.394  49.791  1.00  0.00
ATOM    124  CG  GLU    16      62.085  95.577  49.556  1.00  0.00
ATOM    125  CD  GLU    16      62.515  97.020  49.566  1.00  0.00
ATOM    126  OE1 GLU    16      61.956  97.772  48.681  1.00  0.00
ATOM    127  OE2 GLU    16      63.453  97.452  50.210  1.00  0.00
ATOM    128  C   GLU    16      60.846  93.101  50.622  1.00  0.00
ATOM    129  O   GLU    16      61.814  92.396  50.401  1.00  0.00
ATOM    130  N   GLU    17      60.452  93.352  51.842  1.00  0.00
ATOM    131  CA  GLU    17      60.964  92.730  53.041  1.00  0.00
ATOM    132  CB  GLU    17      60.287  93.331  54.249  1.00  0.00
ATOM    133  CG  GLU    17      61.004  93.043  55.583  1.00  0.00
ATOM    134  CD  GLU    17      60.010  93.224  56.766  1.00  0.00
ATOM    135  OE1 GLU    17      59.288  92.266  57.147  1.00  0.00
ATOM    136  OE2 GLU    17      59.808  94.389  57.197  1.00  0.00
ATOM    137  C   GLU    17      60.789  91.227  52.990  1.00  0.00
ATOM    138  O   GLU    17      61.532  90.406  53.539  1.00  0.00
ATOM    139  N   ASN    18      59.855  90.770  52.100  1.00  0.00
ATOM    140  CA  ASN    18      59.475  89.350  51.809  1.00  0.00
ATOM    141  CB  ASN    18      57.980  89.143  51.697  1.00  0.00
ATOM    142  CG  ASN    18      57.167  89.802  52.750  1.00  0.00
ATOM    143  OD1 ASN    18      57.354  89.482  53.892  1.00  0.00
ATOM    144  ND2 ASN    18      56.273  90.597  52.363  1.00  0.00
ATOM    145  C   ASN    18      60.335  88.781  50.635  1.00  0.00
ATOM    146  O   ASN    18      60.946  87.706  50.743  1.00  0.00
ATOM    147  N   PHE    19      60.505  89.643  49.617  1.00  0.00
ATOM    148  CA  PHE    19      61.391  89.475  48.471  1.00  0.00
ATOM    149  CB  PHE    19      61.257  90.609  47.458  1.00  0.00
ATOM    150  CG  PHE    19      61.691  90.332  46.043  1.00  0.00
ATOM    151  CD1 PHE    19      60.726  90.191  44.981  1.00  0.00
ATOM    152  CE1 PHE    19      61.211  89.975  43.640  1.00  0.00
ATOM    153  CZ  PHE    19      62.569  89.734  43.392  1.00  0.00
ATOM    154  CE2 PHE    19      63.478  89.730  44.502  1.00  0.00
ATOM    155  CD2 PHE    19      63.041  90.082  45.752  1.00  0.00
ATOM    156  C   PHE    19      62.921  89.266  48.840  1.00  0.00
ATOM    157  O   PHE    19      63.408  88.150  48.521  1.00  0.00
ATOM    158  N   LYS    20      63.496  90.193  49.645  1.00  0.00
ATOM    159  CA  LYS    20      64.899  90.059  50.160  1.00  0.00
ATOM    160  CB  LYS    20      65.353  91.235  51.001  1.00  0.00
ATOM    161  CG  LYS    20      65.831  92.458  50.192  1.00  0.00
ATOM    162  CD  LYS    20      66.252  93.554  51.218  1.00  0.00
ATOM    163  CE  LYS    20      66.550  94.902  50.510  1.00  0.00
ATOM    164  NZ  LYS    20      66.919  95.943  51.512  1.00  0.00
ATOM    165  C   LYS    20      65.221  88.731  50.787  1.00  0.00
ATOM    166  O   LYS    20      66.300  88.142  50.667  1.00  0.00
ATOM    167  N   ALA    21      64.226  88.240  51.565  1.00  0.00
ATOM    168  CA  ALA    21      64.332  87.073  52.349  1.00  0.00
ATOM    169  CB  ALA    21      63.305  87.226  53.437  1.00  0.00
ATOM    170  C   ALA    21      64.240  85.719  51.586  1.00  0.00
ATOM    171  O   ALA    21      65.142  84.830  51.708  1.00  0.00
ATOM    172  N   LEU    22      63.216  85.608  50.700  1.00  0.00
ATOM    173  CA  LEU    22      62.975  84.414  49.855  1.00  0.00
ATOM    174  CB  LEU    22      61.686  84.815  49.118  1.00  0.00
ATOM    175  CG  LEU    22      60.481  84.735  50.034  1.00  0.00
ATOM    176  CD1 LEU    22      59.244  85.279  49.385  1.00  0.00
ATOM    177  CD2 LEU    22      60.158  83.274  50.409  1.00  0.00
ATOM    178  C   LEU    22      64.184  84.045  48.985  1.00  0.00
ATOM    179  O   LEU    22      64.210  82.853  48.655  1.00  0.00
ATOM    180  N   VAL    23      65.019  84.919  48.504  1.00  0.00
ATOM    181  CA  VAL    23      65.994  84.529  47.493  1.00  0.00
ATOM    182  CB  VAL    23      65.946  85.470  46.281  1.00  0.00
ATOM    183  CG1 VAL    23      66.392  86.889  46.716  1.00  0.00
ATOM    184  CG2 VAL    23      66.656  85.055  44.978  1.00  0.00
ATOM    185  C   VAL    23      67.339  84.471  48.352  1.00  0.00
ATOM    186  O   VAL    23      68.171  83.617  47.890  1.00  0.00
ATOM    187  N   LEU    24      67.414  85.089  49.566  1.00  0.00
ATOM    188  CA  LEU    24      68.536  84.817  50.511  1.00  0.00
ATOM    189  CB  LEU    24      68.560  85.812  51.700  1.00  0.00
ATOM    190  CG  LEU    24      69.450  85.520  52.923  1.00  0.00
ATOM    191  CD1 LEU    24      71.026  85.677  52.612  1.00  0.00
ATOM    192  CD2 LEU    24      69.154  86.607  53.991  1.00  0.00
ATOM    193  C   LEU    24      68.584  83.296  50.957  1.00  0.00
ATOM    194  O   LEU    24      69.717  82.736  51.045  1.00  0.00
ATOM    195  N   ILE    25      67.377  82.811  51.316  1.00  0.00
ATOM    196  CA  ILE    25      67.099  81.376  51.333  1.00  0.00
ATOM    197  CB  ILE    25      65.657  81.078  51.656  1.00  0.00
ATOM    198  CG2 ILE    25      65.262  79.601  51.498  1.00  0.00
ATOM    199  CG1 ILE    25      65.252  81.707  53.072  1.00  0.00
ATOM    200  CD1 ILE    25      63.731  82.061  53.269  1.00  0.00
ATOM    201  C   ILE    25      67.585  80.568  50.112  1.00  0.00
ATOM    202  O   ILE    25      68.410  79.679  50.317  1.00  0.00
ATOM    203  N   ALA    26      67.106  80.948  48.889  1.00  0.00
ATOM    204  CA  ALA    26      67.619  80.245  47.764  1.00  0.00
ATOM    205  CB  ALA    26      66.991  80.895  46.585  1.00  0.00
ATOM    206  C   ALA    26      69.120  80.153  47.627  1.00  0.00
ATOM    207  O   ALA    26      69.646  79.080  47.607  1.00  0.00
ATOM    208  N   PHE    27      69.856  81.267  47.749  1.00  0.00
ATOM    209  CA  PHE    27      71.322  81.174  47.728  1.00  0.00
ATOM    210  CB  PHE    27      72.073  82.499  47.582  1.00  0.00
ATOM    211  CG  PHE    27      71.665  83.345  46.347  1.00  0.00
ATOM    212  CD1 PHE    27      72.248  83.035  45.102  1.00  0.00
ATOM    213  CE1 PHE    27      71.793  83.777  43.925  1.00  0.00
ATOM    214  CZ  PHE    27      70.905  84.847  44.103  1.00  0.00
ATOM    215  CE2 PHE    27      70.409  85.190  45.352  1.00  0.00
ATOM    216  CD2 PHE    27      70.804  84.416  46.457  1.00  0.00
ATOM    217  C   PHE    27      71.843  80.348  48.930  1.00  0.00
ATOM    218  O   PHE    27      72.827  79.604  48.734  1.00  0.00
ATOM    219  N   ALA    28      71.158  80.335  50.076  1.00  0.00
ATOM    220  CA  ALA    28      71.630  79.552  51.244  1.00  0.00
ATOM    221  CB  ALA    28      71.067  79.968  52.603  1.00  0.00
ATOM    222  C   ALA    28      71.459  78.087  51.040  1.00  0.00
ATOM    223  O   ALA    28      72.413  77.333  51.333  1.00  0.00
ATOM    224  N   GLN    29      70.293  77.629  50.561  1.00  0.00
ATOM    225  CA  GLN    29      69.941  76.229  50.292  1.00  0.00
ATOM    226  CB  GLN    29      68.444  76.022  50.077  1.00  0.00
ATOM    227  CG  GLN    29      67.741  76.499  51.302  1.00  0.00
ATOM    228  CD  GLN    29      66.285  76.113  51.399  1.00  0.00
ATOM    229  OE1 GLN    29      65.575  76.104  50.447  1.00  0.00
ATOM    230  NE2 GLN    29      65.724  76.081  52.578  1.00  0.00
ATOM    231  C   GLN    29      70.796  75.771  48.996  1.00  0.00
ATOM    232  O   GLN    29      71.168  74.607  48.945  1.00  0.00
ATOM    233  N   TYR    30      70.899  76.515  47.937  1.00  0.00
ATOM    234  CA  TYR    30      71.647  76.211  46.714  1.00  0.00
ATOM    235  CB  TYR    30      71.212  77.123  45.533  1.00  0.00
ATOM    236  CG  TYR    30      69.897  76.745  44.843  1.00  0.00
ATOM    237  CD1 TYR    30      69.861  76.616  43.434  1.00  0.00
ATOM    238  CE1 TYR    30      68.628  76.305  42.813  1.00  0.00
ATOM    239  CZ  TYR    30      67.434  76.302  43.564  1.00  0.00
ATOM    240  OH  TYR    30      66.264  76.096  42.827  1.00  0.00
ATOM    241  CE2 TYR    30      67.443  76.513  44.988  1.00  0.00
ATOM    242  CD2 TYR    30      68.691  76.707  45.609  1.00  0.00
ATOM    243  C   TYR    30      73.158  76.236  46.886  1.00  0.00
ATOM    244  O   TYR    30      73.909  75.585  46.184  1.00  0.00
ATOM    245  N   LEU    31      73.656  77.038  47.800  1.00  0.00
ATOM    246  CA  LEU    31      75.054  77.280  48.069  1.00  0.00
ATOM    247  CB  LEU    31      75.579  78.442  47.248  1.00  0.00
ATOM    248  CG  LEU    31      76.202  78.038  45.909  1.00  0.00
ATOM    249  CD1 LEU    31      76.615  79.263  44.994  1.00  0.00
ATOM    250  CD2 LEU    31      77.509  77.254  46.095  1.00  0.00
ATOM    251  C   LEU    31      75.266  77.464  49.585  1.00  0.00
ATOM    252  O   LEU    31      75.373  78.606  50.067  1.00  0.00
ATOM    253  N   GLN    32      75.363  76.367  50.280  1.00  0.00
ATOM    254  CA  GLN    32      75.546  76.459  51.751  1.00  0.00
ATOM    255  CB  GLN    32      75.367  75.053  52.350  1.00  0.00
ATOM    256  CG  GLN    32      73.954  74.489  52.110  1.00  0.00
ATOM    257  CD  GLN    32      73.961  73.017  52.497  1.00  0.00
ATOM    258  OE1 GLN    32      73.748  72.118  51.707  1.00  0.00
ATOM    259  NE2 GLN    32      74.057  72.596  53.735  1.00  0.00
ATOM    260  C   GLN    32      76.988  76.966  52.101  1.00  0.00
ATOM    261  O   GLN    32      77.218  77.400  53.208  1.00  0.00
ATOM    262  N   GLN    33      77.902  76.635  51.184  1.00  0.00
ATOM    263  CA  GLN    33      79.394  76.835  51.282  1.00  0.00
ATOM    264  CB  GLN    33      80.069  75.794  50.319  1.00  0.00
ATOM    265  CG  GLN    33      79.684  75.990  48.873  1.00  0.00
ATOM    266  CD  GLN    33      80.735  75.450  47.862  1.00  0.00
ATOM    267  OE1 GLN    33      81.458  76.254  47.305  1.00  0.00
ATOM    268  NE2 GLN    33      80.830  74.154  47.600  1.00  0.00
ATOM    269  C   GLN    33      79.914  78.273  50.988  1.00  0.00
ATOM    270  O   GLN    33      81.155  78.489  50.873  1.00  0.00
ATOM    271  N   CYS    34      79.036  79.281  51.116  1.00  0.00
ATOM    272  CA  CYS    34      79.367  80.714  50.997  1.00  0.00
ATOM    273  CB  CYS    34      78.518  81.337  49.836  1.00  0.00
ATOM    274  SG  CYS    34      79.006  80.648  48.235  1.00  0.00
ATOM    275  C   CYS    34      78.984  81.527  52.284  1.00  0.00
ATOM    276  O   CYS    34      78.047  81.139  52.952  1.00  0.00
ATOM    277  N   PRO    35      79.778  82.599  52.579  1.00  0.00
ATOM    278  CD  PRO    35      81.078  83.001  51.981  1.00  0.00
ATOM    279  CG  PRO    35      81.788  83.788  53.111  1.00  0.00
ATOM    280  CB  PRO    35      80.647  84.535  53.738  1.00  0.00
ATOM    281  CA  PRO    35      79.470  83.557  53.676  1.00  0.00
ATOM    282  C   PRO    35      78.210  84.464  53.531  1.00  0.00
ATOM    283  O   PRO    35      77.900  84.830  52.435  1.00  0.00
ATOM    284  N   PHE    36      77.557  84.840  54.622  1.00  0.00
ATOM    285  CA  PHE    36      76.531  85.907  54.709  1.00  0.00
ATOM    286  CB  PHE    36      76.097  86.055  56.190  1.00  0.00
ATOM    287  CG  PHE    36      75.007  87.072  56.551  1.00  0.00
ATOM    288  CD1 PHE    36      73.724  86.870  55.995  1.00  0.00
ATOM    289  CE1 PHE    36      72.633  87.697  56.387  1.00  0.00
ATOM    290  CZ  PHE    36      72.915  88.845  57.246  1.00  0.00
ATOM    291  CE2 PHE    36      74.264  89.085  57.694  1.00  0.00
ATOM    292  CD2 PHE    36      75.337  88.169  57.363  1.00  0.00
ATOM    293  C   PHE    36      76.928  87.193  54.070  1.00  0.00
ATOM    294  O   PHE    36      76.197  87.630  53.190  1.00  0.00
ATOM    295  N   GLU    37      78.092  87.736  54.392  1.00  0.00
ATOM    296  CA  GLU    37      78.640  88.888  53.686  1.00  0.00
ATOM    297  CB  GLU    37      79.987  89.350  54.098  1.00  0.00
ATOM    298  CG  GLU    37      80.016  89.589  55.615  1.00  0.00
ATOM    299  CD  GLU    37      81.386  90.220  56.030  1.00  0.00
ATOM    300  OE1 GLU    37      81.605  91.453  55.811  1.00  0.00
ATOM    301  OE2 GLU    37      82.182  89.520  56.704  1.00  0.00
ATOM    302  C   GLU    37      78.769  88.695  52.175  1.00  0.00
ATOM    303  O   GLU    37      78.575  89.713  51.460  1.00  0.00
ATOM    304  N   ASP    38      78.996  87.484  51.603  1.00  0.00
ATOM    305  CA  ASP    38      78.965  87.371  50.156  1.00  0.00
ATOM    306  CB  ASP    38      79.821  86.213  49.733  1.00  0.00
ATOM    307  CG  ASP    38      81.305  86.214  50.190  1.00  0.00
ATOM    308  OD1 ASP    38      82.008  85.283  49.814  1.00  0.00
ATOM    309  OD2 ASP    38      81.814  87.308  50.621  1.00  0.00
ATOM    310  C   ASP    38      77.521  87.255  49.571  1.00  0.00
ATOM    311  O   ASP    38      77.226  87.873  48.604  1.00  0.00
ATOM    312  N   HIE    39      76.606  86.464  50.187  1.00  0.00
ATOM    313  CA  HIE    39      75.261  86.263  49.626  1.00  0.00
ATOM    314  CB  HIE    39      74.476  85.204  50.384  1.00  0.00
ATOM    315  CG  HIE    39      74.852  83.766  49.998  1.00  0.00
ATOM    316  ND1 HIE    39      75.315  83.440  48.758  1.00  0.00
ATOM    317  CE1 HIE    39      75.443  82.109  48.839  1.00  0.00
ATOM    318  NE2 HIE    39      74.946  81.548  49.966  1.00  0.00
ATOM    319  CD2 HIE    39      74.612  82.619  50.807  1.00  0.00
ATOM    320  C   HIE    39      74.518  87.625  49.629  1.00  0.00
ATOM    321  O   HIE    39      73.813  87.876  48.597  1.00  0.00
ATOM    322  N   VAL    40      74.531  88.384  50.718  1.00  0.00
ATOM    323  CA  VAL    40      73.822  89.635  50.767  1.00  0.00
ATOM    324  CB  VAL    40      73.922  90.174  52.195  1.00  0.00
ATOM    325  CG1 VAL    40      73.290  89.258  53.293  1.00  0.00
ATOM    326  CG2 VAL    40      75.386  90.654  52.557  1.00  0.00
ATOM    327  C   VAL    40      74.198  90.710  49.768  1.00  0.00
ATOM    328  O   VAL    40      73.525  91.758  49.757  1.00  0.00
ATOM    329  N   LYS    41      75.231  90.565  48.918  1.00  0.00
ATOM    330  CA  LYS    41      75.578  91.409  47.730  1.00  0.00
ATOM    331  CB  LYS    41      77.061  91.197  47.511  1.00  0.00
ATOM    332  CG  LYS    41      77.877  91.700  48.721  1.00  0.00
ATOM    333  CD  LYS    41      79.365  91.317  48.467  1.00  0.00
ATOM    334  CE  LYS    41      80.397  92.118  49.340  1.00  0.00
ATOM    335  NZ  LYS    41      80.315  91.794  50.754  1.00  0.00
ATOM    336  C   LYS    41      74.817  90.924  46.460  1.00  0.00
ATOM    337  O   LYS    41      74.595  91.767  45.579  1.00  0.00
ATOM    338  N   LEU    42      74.375  89.685  46.256  1.00  0.00
ATOM    339  CA  LEU    42      73.551  89.250  45.107  1.00  0.00
ATOM    340  CB  LEU    42      73.743  87.692  44.899  1.00  0.00
ATOM    341  CG  LEU    42      75.149  87.058  44.928  1.00  0.00
ATOM    342  CD1 LEU    42      74.878  85.566  44.829  1.00  0.00
ATOM    343  CD2 LEU    42      75.861  87.543  43.635  1.00  0.00
ATOM    344  C   LEU    42      72.082  89.695  45.412  1.00  0.00
ATOM    345  O   LEU    42      71.392  90.169  44.454  1.00  0.00
ATOM    346  N   VAL    43      71.693  89.572  46.695  1.00  0.00
ATOM    347  CA  VAL    43      70.315  89.872  47.007  1.00  0.00
ATOM    348  CB  VAL    43      70.115  89.432  48.432  1.00  0.00
ATOM    349  CG1 VAL    43      68.801  89.758  48.984  1.00  0.00
ATOM    350  CG2 VAL    43      70.241  87.890  48.650  1.00  0.00
ATOM    351  C   VAL    43      69.977  91.335  46.827  1.00  0.00
ATOM    352  O   VAL    43      68.782  91.605  46.484  1.00  0.00
ATOM    353  N   ASN    44      70.881  92.233  46.960  1.00  0.00
ATOM    354  CA  ASN    44      70.658  93.689  46.676  1.00  0.00
ATOM    355  CB  ASN    44      71.755  94.708  47.125  1.00  0.00
ATOM    356  CG  ASN    44      71.249  96.021  47.608  1.00  0.00
ATOM    357  OD1 ASN    44      70.855  96.192  48.757  1.00  0.00
ATOM    358  ND2 ASN    44      70.941  96.956  46.678  1.00  0.00
ATOM    359  C   ASN    44      70.371  93.897  45.230  1.00  0.00
ATOM    360  O   ASN    44      69.431  94.575  44.869  1.00  0.00
ATOM    361  N   GLU    45      71.305  93.437  44.388  1.00  0.00
ATOM    362  CA  GLU    45      71.274  93.425  42.891  1.00  0.00
ATOM    363  CB  GLU    45      72.428  92.598  42.324  1.00  0.00
ATOM    364  CG  GLU    45      72.760  93.084  40.915  1.00  0.00
ATOM    365  CD  GLU    45      73.953  92.394  40.217  1.00  0.00
ATOM    366  OE1 GLU    45      73.713  91.581  39.267  1.00  0.00
ATOM    367  OE2 GLU    45      75.105  92.721  40.513  1.00  0.00
ATOM    368  C   GLU    45      69.911  92.911  42.288  1.00  0.00
ATOM    369  O   GLU    45      69.214  93.748  41.660  1.00  0.00
ATOM    370  N   VAL    46      69.438  91.669  42.639  1.00  0.00
ATOM    371  CA  VAL    46      68.127  91.200  42.131  1.00  0.00
ATOM    372  CB  VAL    46      67.900  89.686  42.272  1.00  0.00
ATOM    373  CG1 VAL    46      68.845  88.951  41.374  1.00  0.00
ATOM    374  CG2 VAL    46      67.977  89.273  43.777  1.00  0.00
ATOM    375  C   VAL    46      67.000  92.055  42.747  1.00  0.00
ATOM    376  O   VAL    46      65.944  92.270  42.142  1.00  0.00
ATOM    377  N   THR    47      67.110  92.540  43.956  1.00  0.00
ATOM    378  CA  THR    47      66.041  93.284  44.608  1.00  0.00
ATOM    379  CB  THR    47      66.200  93.445  46.065  1.00  0.00
ATOM    380  CG2 THR    47      65.084  94.305  46.748  1.00  0.00
ATOM    381  OG1 THR    47      66.248  92.249  46.725  1.00  0.00
ATOM    382  C   THR    47      65.922  94.594  43.928  1.00  0.00
ATOM    383  O   THR    47      64.793  95.027  43.626  1.00  0.00
ATOM    384  N   GLU    48      67.049  95.240  43.555  1.00  0.00
ATOM    385  CA  GLU    48      67.123  96.475  42.831  1.00  0.00
ATOM    386  CB  GLU    48      68.553  96.951  42.647  1.00  0.00
ATOM    387  CG  GLU    48      68.557  98.371  42.130  1.00  0.00
ATOM    388  CD  GLU    48      69.936  98.963  41.865  1.00  0.00
ATOM    389  OE1 GLU    48      69.942 100.215  41.740  1.00  0.00
ATOM    390  OE2 GLU    48      70.994  98.284  41.850  1.00  0.00
ATOM    391  C   GLU    48      66.477  96.369  41.447  1.00  0.00
ATOM    392  O   GLU    48      65.620  97.198  41.138  1.00  0.00
ATOM    393  N   PHE    49      66.690  95.218  40.793  1.00  0.00
ATOM    394  CA  PHE    49      66.073  94.841  39.559  1.00  0.00
ATOM    395  CB  PHE    49      66.752  93.588  38.976  1.00  0.00
ATOM    396  CG  PHE    49      66.358  93.327  37.587  1.00  0.00
ATOM    397  CD1 PHE    49      67.172  93.804  36.549  1.00  0.00
ATOM    398  CE1 PHE    49      66.855  93.557  35.188  1.00  0.00
ATOM    399  CZ  PHE    49      65.745  92.737  34.920  1.00  0.00
ATOM    400  CE2 PHE    49      64.873  92.360  35.958  1.00  0.00
ATOM    401  CD2 PHE    49      65.204  92.538  37.269  1.00  0.00
ATOM    402  C   PHE    49      64.555  94.773  39.702  1.00  0.00
ATOM    403  O   PHE    49      63.868  95.568  39.039  1.00  0.00
ATOM    404  N   ALA    50      63.961  94.117  40.722  1.00  0.00
ATOM    405  CA  ALA    50      62.540  93.957  40.971  1.00  0.00
ATOM    406  CB  ALA    50      62.278  92.989  42.132  1.00  0.00
ATOM    407  C   ALA    50      61.848  95.302  41.319  1.00  0.00
ATOM    408  O   ALA    50      60.798  95.582  40.810  1.00  0.00
ATOM    409  N   LYS    51      62.441  96.071  42.234  1.00  0.00
ATOM    410  CA  LYS    51      62.035  97.385  42.595  1.00  0.00
ATOM    411  CB  LYS    51      62.943  97.789  43.685  1.00  0.00
ATOM    412  CG  LYS    51      62.369  98.993  44.398  1.00  0.00
ATOM    413  CD  LYS    51      62.810  99.324  45.878  1.00  0.00
ATOM    414  CE  LYS    51      62.068 100.552  46.525  1.00  0.00
ATOM    415  NZ  LYS    51      62.167 100.668  47.973  1.00  0.00
ATOM    416  C   LYS    51      62.010  98.381  41.409  1.00  0.00
ATOM    417  O   LYS    51      61.097  99.122  41.167  1.00  0.00
ATOM    418  N   THR    52      63.122  98.581  40.636  1.00  0.00
ATOM    419  CA  THR    52      63.206  99.497  39.478  1.00  0.00
ATOM    420  CB  THR    52      64.634  99.725  38.955  1.00  0.00
ATOM    421  CG2 THR    52      64.877 100.905  38.029  1.00  0.00
ATOM    422  OG1 THR    52      65.389  99.931  40.166  1.00  0.00
ATOM    423  C   THR    52      62.289  99.014  38.341  1.00  0.00
ATOM    424  O   THR    52      61.774  99.784  37.550  1.00  0.00
ATOM    425  N   CYX    53      61.962  97.698  38.312  1.00  0.00
ATOM    426  CA  CYX    53      60.977  97.169  37.358  1.00  0.00
ATOM    427  CB  CYX    53      61.127  95.578  37.263  1.00  0.00
ATOM    428  SG  CYX    53      60.135  94.999  35.860  1.00  0.00
ATOM    429  C   CYX    53      59.488  97.551  37.643  1.00  0.00
ATOM    430  O   CYX    53      58.745  97.949  36.747  1.00  0.00
ATOM    431  N   VAL    54      59.097  97.575  38.915  1.00  0.00
ATOM    432  CA  VAL    54      57.826  98.246  39.312  1.00  0.00
ATOM    433  CB  VAL    54      57.385  97.749  40.746  1.00  0.00
ATOM    434  CG1 VAL    54      56.853  96.246  40.691  1.00  0.00
ATOM    435  CG2 VAL    54      58.294  98.044  41.940  1.00  0.00
ATOM    436  C   VAL    54      57.883  99.799  39.227  1.00  0.00
ATOM    437  O   VAL    54      56.769 100.327  39.114  1.00  0.00
ATOM    438  N   ALA    55      59.047 100.457  39.143  1.00  0.00
ATOM    439  CA  ALA    55      59.211 101.877  38.875  1.00  0.00
ATOM    440  CB  ALA    55      60.564 102.193  39.512  1.00  0.00
ATOM    441  C   ALA    55      59.137 102.322  37.383  1.00  0.00
ATOM    442  O   ALA    55      58.990 103.535  37.160  1.00  0.00
ATOM    443  N   ASP    56      59.113 101.392  36.392  1.00  0.00
ATOM    444  CA  ASP    56      59.107 101.672  34.941  1.00  0.00
ATOM    445  CB  ASP    56      60.557 101.760  34.385  1.00  0.00
ATOM    446  CG  ASP    56      60.620 102.290  32.986  1.00  0.00
ATOM    447  OD1 ASP    56      61.791 102.728  32.683  1.00  0.00
ATOM    448  OD2 ASP    56      59.622 102.203  32.196  1.00  0.00
ATOM    449  C   ASP    56      58.283 100.587  34.159  1.00  0.00
ATOM    450  O   ASP    56      58.586  99.396  34.217  1.00  0.00
ATOM    451  N   GLU    57      57.273 100.914  33.322  1.00  0.00
ATOM    452  CA  GLU    57      56.530  99.978  32.521  1.00  0.00
ATOM    453  CB  GLU    57      55.286 100.769  32.100  1.00  0.00
ATOM    454  CG  GLU    57      55.498 101.741  30.911  1.00  0.00
ATOM    455  CD  GLU    57      54.371 102.793  30.788  1.00  0.00
ATOM    456  OE1 GLU    57      54.416 103.842  31.447  1.00  0.00
ATOM    457  OE2 GLU    57      53.421 102.476  30.081  1.00  0.00
ATOM    458  C   GLU    57      57.294  99.321  31.349  1.00  0.00
ATOM    459  O   GLU    57      56.812  98.346  30.771  1.00  0.00
ATOM    460  N   SER    58      58.494  99.832  30.983  1.00  0.00
ATOM    461  CA  SER    58      59.236  99.510  29.748  1.00  0.00
ATOM    462  CB  SER    58      60.404 100.423  29.385  1.00  0.00
ATOM    463  OG  SER    58      59.952 101.744  29.112  1.00  0.00
ATOM    464  C   SER    58      59.883  98.156  29.747  1.00  0.00
ATOM    465  O   SER    58      60.746  97.855  30.609  1.00  0.00
ATOM    466  N   ALA    59      59.541  97.226  28.866  1.00  0.00
ATOM    467  CA  ALA    59      59.911  95.846  28.947  1.00  0.00
ATOM    468  CB  ALA    59      58.910  95.016  28.219  1.00  0.00
ATOM    469  C   ALA    59      61.358  95.533  28.470  1.00  0.00
ATOM    470  O   ALA    59      62.043  94.825  29.149  1.00  0.00
ATOM    471  N   GLU    60      61.930  96.329  27.622  1.00  0.00
ATOM    472  CA  GLU    60      63.317  96.287  27.215  1.00  0.00
ATOM    473  CB  GLU    60      63.618  96.807  25.802  1.00  0.00
ATOM    474  CG  GLU    60      63.578  98.299  25.726  1.00  0.00
ATOM    475  CD  GLU    60      64.173  98.708  24.367  1.00  0.00
ATOM    476  OE1 GLU    60      65.419  98.747  24.305  1.00  0.00
ATOM    477  OE2 GLU    60      63.390  98.894  23.410  1.00  0.00
ATOM    478  C   GLU    60      64.294  96.796  28.313  1.00  0.00
ATOM    479  O   GLU    60      65.517  96.869  28.099  1.00  0.00
ATOM    480  N   ASN    61      63.775  97.258  29.437  1.00  0.00
ATOM    481  CA  ASN    61      64.521  97.715  30.612  1.00  0.00
ATOM    482  CB  ASN    61      64.240  99.257  30.943  1.00  0.00
ATOM    483  CG  ASN    61      64.662 100.142  29.774  1.00  0.00
ATOM    484  OD1 ASN    61      63.765 100.678  29.088  1.00  0.00
ATOM    485  ND2 ASN    61      65.945 100.092  29.347  1.00  0.00
ATOM    486  C   ASN    61      64.183  96.758  31.785  1.00  0.00
ATOM    487  O   ASN    61      64.624  97.108  32.888  1.00  0.00
ATOM    488  N   CYX    62      63.443  95.642  31.621  1.00  0.00
ATOM    489  CA  CYX    62      63.110  94.631  32.649  1.00  0.00
ATOM    490  CB  CYX    62      61.806  95.002  33.374  1.00  0.00
ATOM    491  SG  CYX    62      61.386  93.927  34.749  1.00  0.00
ATOM    492  C   CYX    62      63.170  93.246  32.028  1.00  0.00
ATOM    493  O   CYX    62      62.478  92.258  32.401  1.00  0.00
ATOM    494  N   ASP    63      64.195  93.099  31.162  1.00  0.00
ATOM    495  CA  ASP    63      64.160  92.130  30.104  1.00  0.00
ATOM    496  CB  ASP    63      64.948  92.596  28.945  1.00  0.00
ATOM    497  CG  ASP    63      66.475  92.536  29.102  1.00  0.00
ATOM    498  OD1 ASP    63      67.018  93.071  30.064  1.00  0.00
ATOM    499  OD2 ASP    63      67.238  92.000  28.251  1.00  0.00
ATOM    500  C   ASP    63      64.511  90.669  30.459  1.00  0.00
ATOM    501  O   ASP    63      64.631  89.825  29.546  1.00  0.00
ATOM    502  N   LYS    64      64.831  90.388  31.711  1.00  0.00
ATOM    503  CA  LYS    64      65.505  89.096  32.078  1.00  0.00
ATOM    504  CB  LYS    64      66.667  89.374  33.102  1.00  0.00
ATOM    505  CG  LYS    64      67.833  90.206  32.557  1.00  0.00
ATOM    506  CD  LYS    64      68.311  89.765  31.158  1.00  0.00
ATOM    507  CE  LYS    64      69.650  90.562  30.930  1.00  0.00
ATOM    508  NZ  LYS    64      69.444  91.925  30.475  1.00  0.00
ATOM    509  C   LYS    64      64.514  88.105  32.776  1.00  0.00
ATOM    510  O   LYS    64      63.694  88.575  33.569  1.00  0.00
ATOM    511  N   SER    65      64.624  86.748  32.540  1.00  0.00
ATOM    512  CA  SER    65      63.739  85.774  33.156  1.00  0.00
ATOM    513  CB  SER    65      63.797  84.477  32.429  1.00  0.00
ATOM    514  OG  SER    65      65.011  83.685  32.445  1.00  0.00
ATOM    515  C   SER    65      64.189  85.673  34.617  1.00  0.00
ATOM    516  O   SER    65      65.338  85.831  34.958  1.00  0.00
ATOM    517  N   LEU    66      63.270  85.296  35.519  1.00  0.00
ATOM    518  CA  LEU    66      63.535  85.097  36.985  1.00  0.00
ATOM    519  CB  LEU    66      62.132  85.042  37.682  1.00  0.00
ATOM    520  CG  LEU    66      62.212  84.654  39.222  1.00  0.00
ATOM    521  CD1 LEU    66      63.102  85.654  39.986  1.00  0.00
ATOM    522  CD2 LEU    66      60.791  84.728  39.872  1.00  0.00
ATOM    523  C   LEU    66      64.438  83.871  37.286  1.00  0.00
ATOM    524  O   LEU    66      65.280  83.913  38.178  1.00  0.00
ATOM    525  N   HID    67      64.388  82.889  36.425  1.00  0.00
ATOM    526  CA  HID    67      65.169  81.647  36.565  1.00  0.00
ATOM    527  CB  HID    67      64.303  80.535  35.950  1.00  0.00
ATOM    528  CG  HID    67      64.679  79.175  36.529  1.00  0.00
ATOM    529  ND1 HID    67      64.662  78.880  37.914  1.00  0.00
ATOM    530  CE1 HID    67      64.713  77.561  38.041  1.00  0.00
ATOM    531  NE2 HID    67      64.736  76.915  36.793  1.00  0.00
ATOM    532  CD2 HID    67      64.761  77.958  35.902  1.00  0.00
ATOM    533  C   HID    67      66.611  81.773  36.034  1.00  0.00
ATOM    534  O   HID    67      67.481  81.114  36.629  1.00  0.00
ATOM    535  N   THR    68      66.853  82.633  35.026  1.00  0.00
ATOM    536  CA  THR    68      68.245  82.977  34.557  1.00  0.00
ATOM    537  CB  THR    68      68.331  83.204  33.013  1.00  0.00
ATOM    538  CG2 THR    68      67.926  82.041  32.128  1.00  0.00
ATOM    539  OG1 THR    68      67.638  84.337  32.597  1.00  0.00
ATOM    540  C   THR    68      68.846  84.174  35.355  1.00  0.00
ATOM    541  O   THR    68      70.014  84.259  35.633  1.00  0.00
ATOM    542  N   LEU    69      67.965  85.120  35.869  1.00  0.00
ATOM    543  CA  LEU    69      68.402  86.256  36.645  1.00  0.00
ATOM    544  CB  LEU    69      67.201  87.155  36.712  1.00  0.00
ATOM    545  CG  LEU    69      67.451  88.498  37.470  1.00  0.00
ATOM    546  CD1 LEU    69      68.464  89.381  36.738  1.00  0.00
ATOM    547  CD2 LEU    69      66.200  89.291  37.738  1.00  0.00
ATOM    548  C   LEU    69      69.136  85.836  37.964  1.00  0.00
ATOM    549  O   LEU    69      70.057  86.555  38.425  1.00  0.00
ATOM    550  N   PHE    70      68.819  84.666  38.542  1.00  0.00
ATOM    551  CA  PHE    70      69.350  83.976  39.684  1.00  0.00
ATOM    552  CB  PHE    70      68.169  83.268  40.300  1.00  0.00
ATOM    553  CG  PHE    70      68.325  82.216  41.451  1.00  0.00
ATOM    554  CD1 PHE    70      68.679  82.594  42.749  1.00  0.00
ATOM    555  CE1 PHE    70      68.939  81.672  43.810  1.00  0.00
ATOM    556  CZ  PHE    70      68.746  80.315  43.501  1.00  0.00
ATOM    557  CE2 PHE    70      68.314  79.924  42.195  1.00  0.00
ATOM    558  CD2 PHE    70      68.094  80.881  41.215  1.00  0.00
ATOM    559  C   PHE    70      70.542  83.082  39.281  1.00  0.00
ATOM    560  O   PHE    70      71.538  83.051  39.987  1.00  0.00
ATOM    561  N   GLY    71      70.425  82.380  38.148  1.00  0.00
ATOM    562  CA  GLY    71      71.445  81.417  37.721  1.00  0.00
ATOM    563  C   GLY    71      72.816  82.191  37.389  1.00  0.00
ATOM    564  O   GLY    71      73.908  81.800  37.821  1.00  0.00
ATOM    565  N   ASP    72      72.685  83.351  36.722  1.00  0.00
ATOM    566  CA  ASP    72      73.734  84.369  36.497  1.00  0.00
ATOM    567  CB  ASP    72      73.206  85.511  35.633  1.00  0.00
ATOM    568  CG  ASP    72      72.884  85.067  34.139  1.00  0.00
ATOM    569  OD1 ASP    72      73.249  84.006  33.677  1.00  0.00
ATOM    570  OD2 ASP    72      72.254  85.909  33.463  1.00  0.00
ATOM    571  C   ASP    72      74.340  84.788  37.780  1.00  0.00
ATOM    572  O   ASP    72      75.538  85.288  37.885  1.00  0.00
ATOM    573  N   LYS    73      73.558  84.946  38.842  1.00  0.00
ATOM    574  CA  LYS    73      73.931  85.252  40.236  1.00  0.00
ATOM    575  CB  LYS    73      72.705  85.875  40.918  1.00  0.00
ATOM    576  CG  LYS    73      72.274  87.188  40.350  1.00  0.00
ATOM    577  CD  LYS    73      73.258  88.366  40.341  1.00  0.00
ATOM    578  CE  LYS    73      74.138  88.230  39.131  1.00  0.00
ATOM    579  NZ  LYS    73      75.132  89.245  38.865  1.00  0.00
ATOM    580  C   LYS    73      74.557  84.057  40.978  1.00  0.00
ATOM    581  O   LYS    73      75.628  84.264  41.588  1.00  0.00
ATOM    582  N   LEU    74      74.136  82.831  40.760  1.00  0.00
ATOM    583  CA  LEU    74      74.824  81.587  41.250  1.00  0.00
ATOM    584  CB  LEU    74      73.893  80.362  41.006  1.00  0.00
ATOM    585  CG  LEU    74      72.634  80.268  41.941  1.00  0.00
ATOM    586  CD1 LEU    74      71.679  79.274  41.183  1.00  0.00
ATOM    587  CD2 LEU    74      72.990  79.719  43.274  1.00  0.00
ATOM    588  C   LEU    74      76.178  81.533  40.661  1.00  0.00
ATOM    589  O   LEU    74      77.135  81.317  41.410  1.00  0.00
ATOM    590  N   CYX    75      76.371  81.859  39.403  1.00  0.00
ATOM    591  CA  CYX    75      77.684  81.870  38.715  1.00  0.00
ATOM    592  CB  CYX    75      77.523  81.700  37.168  1.00  0.00
ATOM    593  SG  CYX    75      76.902  79.999  36.909  1.00  0.00
ATOM    594  C   CYX    75      78.527  83.147  39.039  1.00  0.00
ATOM    595  O   CYX    75      79.745  83.041  38.961  1.00  0.00
ATOM    596  N   THR    76      77.877  84.145  39.550  1.00  0.00
ATOM    597  CA  THR    76      78.652  85.263  40.158  1.00  0.00
ATOM    598  CB  THR    76      77.779  86.509  40.484  1.00  0.00
ATOM    599  CG2 THR    76      78.430  87.663  41.225  1.00  0.00
ATOM    600  OG1 THR    76      77.319  87.013  39.268  1.00  0.00
ATOM    601  C   THR    76      79.395  84.843  41.413  1.00  0.00
ATOM    602  O   THR    76      80.441  85.456  41.769  1.00  0.00
ATOM    603  N   VAL    77      78.922  83.838  42.221  1.00  0.00
ATOM    604  CA  VAL    77      79.670  83.257  43.358  1.00  0.00
ATOM    605  CB  VAL    77      78.834  83.207  44.668  1.00  0.00
ATOM    606  CG1 VAL    77      78.875  84.581  45.414  1.00  0.00
ATOM    607  CG2 VAL    77      77.423  82.661  44.442  1.00  0.00
ATOM    608  C   VAL    77      80.292  81.898  43.149  1.00  0.00
ATOM    609  O   VAL    77      81.190  81.562  43.927  1.00  0.00
ATOM    610  N   ALA    78      79.948  81.164  42.098  1.00  0.00
ATOM    611  CA  ALA    78      80.868  80.061  41.548  1.00  0.00
ATOM    612  CB  ALA    78      80.214  79.532  40.215  1.00  0.00
ATOM    613  C   ALA    78      82.275  80.681  41.165  1.00  0.00
ATOM    614  O   ALA    78      83.373  80.119  41.355  1.00  0.00
ATOM    615  N   THR    79      82.210  81.795  40.477  1.00  0.00
ATOM    616  CA  THR    79      83.422  82.483  40.046  1.00  0.00
ATOM    617  CB  THR    79      83.152  83.562  38.998  1.00  0.00
ATOM    618  CG2 THR    79      82.639  82.922  37.656  1.00  0.00
ATOM    619  OG1 THR    79      82.142  84.437  39.358  1.00  0.00
ATOM    620  C   THR    79      84.343  82.899  41.261  1.00  0.00
ATOM    621  O   THR    79      83.819  82.964  42.384  1.00  0.00
ATOM    622  N   LEU    80      85.668  83.128  41.022  1.00  0.00
ATOM    623  CA  LEU    80      86.618  83.489  42.064  1.00  0.00
ATOM    624  CB  LEU    80      86.506  84.982  42.471  1.00  0.00
ATOM    625  CG  LEU    80      87.704  85.622  43.140  1.00  0.00
ATOM    626  CD1 LEU    80      89.070  84.916  42.761  1.00  0.00
ATOM    627  CD2 LEU    80      87.718  87.073  42.708  1.00  0.00
ATOM    628  C   LEU    80      86.635  82.575  43.356  1.00  0.00
ATOM    629  O   LEU    80      86.892  83.063  44.456  1.00  0.00
ATOM    630  N   ARG    81      86.331  81.269  43.230  1.00  0.00
ATOM    631  CA  ARG    81      85.997  80.357  44.330  1.00  0.00
ATOM    632  CB  ARG    81      84.500  80.510  44.738  1.00  0.00
ATOM    633  CG  ARG    81      84.184  80.064  46.175  1.00  0.00
ATOM    634  CD  ARG    81      82.669  80.202  46.355  1.00  0.00
ATOM    635  NE  ARG    81      82.243  81.630  46.466  1.00  0.00
ATOM    636  CZ  ARG    81      82.181  82.446  47.493  1.00  0.00
ATOM    637  NH1 ARG    81      81.898  83.694  47.315  1.00  0.00
ATOM    638  NH2 ARG    81      82.399  81.967  48.721  1.00  0.00
ATOM    639  C   ARG    81      86.267  78.879  44.135  1.00  0.00
ATOM    640  O   ARG    81      85.744  78.198  43.168  1.00  0.00
ATOM    641  N   GLU    82      87.181  78.354  44.915  1.00  0.00
ATOM    642  CA  GLU    82      87.700  77.003  44.759  1.00  0.00
ATOM    643  CB  GLU    82      89.220  76.937  45.104  1.00  0.00
ATOM    644  CG  GLU    82      89.425  77.027  46.614  1.00  0.00
ATOM    645  CD  GLU    82      90.813  77.171  47.109  1.00  0.00
ATOM    646  OE1 GLU    82      91.136  76.352  47.996  1.00  0.00
ATOM    647  OE2 GLU    82      91.661  78.004  46.684  1.00  0.00
ATOM    648  C   GLU    82      86.794  75.965  45.441  1.00  0.00
ATOM    649  O   GLU    82      86.976  74.730  45.310  1.00  0.00
ATOM    650  N   THR    83      85.914  76.442  46.320  1.00  0.00
ATOM    651  CA  THR    83      85.040  75.486  47.020  1.00  0.00
ATOM    652  CB  THR    83      84.495  76.026  48.366  1.00  0.00
ATOM    653  CG2 THR    83      85.552  76.188  49.414  1.00  0.00
ATOM    654  OG1 THR    83      83.851  77.225  48.104  1.00  0.00
ATOM    655  C   THR    83      83.946  75.019  46.044  1.00  0.00
ATOM    656  O   THR    83      83.533  73.887  46.146  1.00  0.00
ATOM    657  N   TYR    84      83.472  75.921  45.151  1.00  0.00
ATOM    658  CA  TYR    84      82.734  75.560  43.970  1.00  0.00
ATOM    659  CB  TYR    84      82.329  76.802  43.165  1.00  0.00
ATOM    660  CG  TYR    84      81.768  76.713  41.775  1.00  0.00
ATOM    661  CD1 TYR    84      82.582  76.942  40.698  1.00  0.00
ATOM    662  CE1 TYR    84      82.099  76.728  39.400  1.00  0.00
ATOM    663  CZ  TYR    84      80.871  76.101  39.247  1.00  0.00
ATOM    664  OH  TYR    84      80.388  75.834  38.034  1.00  0.00
ATOM    665  CE2 TYR    84      80.078  75.709  40.349  1.00  0.00
ATOM    666  CD2 TYR    84      80.520  76.021  41.614  1.00  0.00
ATOM    667  C   TYR    84      83.409  74.624  42.937  1.00  0.00
ATOM    668  O   TYR    84      82.741  73.795  42.238  1.00  0.00
ATOM    669  N   GLY    85      84.740  74.736  42.796  1.00  0.00
ATOM    670  CA  GLY    85      85.502  73.848  41.919  1.00  0.00
ATOM    671  C   GLY    85      85.568  72.431  42.353  1.00  0.00
ATOM    672  O   GLY    85      85.866  71.607  41.504  1.00  0.00
ATOM    673  N   GLU    86      85.209  72.014  43.567  1.00  0.00
ATOM    674  CA  GLU    86      85.148  70.590  43.912  1.00  0.00
ATOM    675  CB  GLU    86      85.196  70.508  45.447  1.00  0.00
ATOM    676  CG  GLU    86      85.325  69.130  46.064  1.00  0.00
ATOM    677  CD  GLU    86      85.454  69.327  47.556  1.00  0.00
ATOM    678  OE1 GLU    86      86.477  69.867  48.076  1.00  0.00
ATOM    679  OE2 GLU    86      84.492  69.141  48.348  1.00  0.00
ATOM    680  C   GLU    86      83.894  69.866  43.294  1.00  0.00
ATOM    681  O   GLU    86      83.961  68.627  43.131  1.00  0.00
ATOM    682  N   MET    87      82.780  70.564  43.067  1.00  0.00
ATOM    683  CA  MET    87      81.483  70.129  42.526  1.00  0.00
ATOM    684  CB  MET    87      80.349  71.097  42.778  1.00  0.00
ATOM    685  CG  MET    87      79.941  71.492  44.191  1.00  0.00
ATOM    686  SD  MET    87      79.232  73.175  44.292  1.00  0.00
ATOM    687  CE  MET    87      77.884  72.981  43.108  1.00  0.00
ATOM    688  C   MET    87      81.569  69.968  40.991  1.00  0.00
ATOM    689  O   MET    87      82.516  70.445  40.414  1.00  0.00
ATOM    690  N   ALA    88      80.585  69.342  40.382  1.00  0.00
ATOM    691  CA  ALA    88      80.479  69.439  38.911  1.00  0.00
ATOM    692  CB  ALA    88      79.250  68.603  38.389  1.00  0.00
ATOM    693  C   ALA    88      80.343  70.931  38.453  1.00  0.00
ATOM    694  O   ALA    88      79.974  71.752  39.267  1.00  0.00
ATOM    695  N   ASP    89      80.692  71.268  37.213  1.00  0.00
ATOM    696  CA  ASP    89      80.755  72.630  36.698  1.00  0.00
ATOM    697  CB  ASP    89      81.791  72.701  35.561  1.00  0.00
ATOM    698  CG  ASP    89      82.053  74.205  35.171  1.00  0.00
ATOM    699  OD1 ASP    89      82.540  74.422  34.040  1.00  0.00
ATOM    700  OD2 ASP    89      81.907  75.107  36.004  1.00  0.00
ATOM    701  C   ASP    89      79.307  73.094  36.220  1.00  0.00
ATOM    702  O   ASP    89      78.883  73.005  35.081  1.00  0.00
ATOM    703  N   CYX    90      78.545  73.554  37.185  1.00  0.00
ATOM    704  CA  CYX    90      77.183  74.031  36.960  1.00  0.00
ATOM    705  CB  CYX    90      76.452  74.421  38.177  1.00  0.00
ATOM    706  SG  CYX    90      76.349  73.072  39.453  1.00  0.00
ATOM    707  C   CYX    90      77.039  75.155  35.886  1.00  0.00
ATOM    708  O   CYX    90      75.955  75.179  35.262  1.00  0.00
ATOM    709  N   CYX    91      78.007  76.101  35.849  1.00  0.00
ATOM    710  CA  CYX    91      78.068  77.261  34.971  1.00  0.00
ATOM    711  CB  CYX    91      79.010  78.225  35.579  1.00  0.00
ATOM    712  SG  CYX    91      78.504  78.776  37.212  1.00  0.00
ATOM    713  C   CYX    91      78.224  77.007  33.534  1.00  0.00
ATOM    714  O   CYX    91      78.244  77.956  32.727  1.00  0.00
ATOM    715  N   ALA    92      78.446  75.764  32.976  1.00  0.00
ATOM    716  CA  ALA    92      78.579  75.450  31.573  1.00  0.00
ATOM    717  CB  ALA    92      79.638  74.326  31.443  1.00  0.00
ATOM    718  C   ALA    92      77.247  75.011  30.973  1.00  0.00
ATOM    719  O   ALA    92      77.103  74.863  29.756  1.00  0.00
ATOM    720  N   LYS    93      76.260  74.756  31.886  1.00  0.00
ATOM    721  CA  LYS    93      74.905  74.421  31.588  1.00  0.00
ATOM    722  CB  LYS    93      74.258  73.435  32.564  1.00  0.00
ATOM    723  CG  LYS    93      75.018  72.117  32.444  1.00  0.00
ATOM    724  CD  LYS    93      74.623  70.951  33.455  1.00  0.00
ATOM    725  CE  LYS    93      75.499  69.743  33.174  1.00  0.00
ATOM    726  NZ  LYS    93      75.010  68.607  33.988  1.00  0.00
ATOM    727  C   LYS    93      73.946  75.664  31.344  1.00  0.00
ATOM    728  O   LYS    93      74.363  76.798  31.635  1.00  0.00
ATOM    729  N   GLN    94      72.840  75.365  30.688  1.00  0.00
ATOM    730  CA  GLN    94      71.766  76.324  30.520  1.00  0.00
ATOM    731  CB  GLN    94      71.487  76.463  28.977  1.00  0.00
ATOM    732  CG  GLN    94      72.657  77.276  28.282  1.00  0.00
ATOM    733  CD  GLN    94      72.331  77.556  26.821  1.00  0.00
ATOM    734  OE1 GLN    94      71.472  76.946  26.118  1.00  0.00
ATOM    735  NE2 GLN    94      73.013  78.483  26.108  1.00  0.00
ATOM    736  C   GLN    94      70.599  75.931  31.374  1.00  0.00
ATOM    737  O   GLN    94      70.437  74.755  31.726  1.00  0.00
ATOM    738  N   GLU    95      69.703  76.922  31.600  1.00  0.00
ATOM    739  CA  GLU    95      68.479  76.708  32.368  1.00  0.00
ATOM    740  CB  GLU    95      67.682  78.054  32.562  1.00  0.00
ATOM    741  CG  GLU    95      67.888  78.749  33.935  1.00  0.00
ATOM    742  CD  GLU    95      69.306  79.163  34.269  1.00  0.00
ATOM    743  OE1 GLU    95      69.954  79.928  33.486  1.00  0.00
ATOM    744  OE2 GLU    95      69.821  78.718  35.320  1.00  0.00
ATOM    745  C   GLU    95      67.534  75.619  31.705  1.00  0.00
ATOM    746  O   GLU    95      67.570  75.497  30.503  1.00  0.00
ATOM    747  N   PRO    96      66.667  74.953  32.458  1.00  0.00
ATOM    748  CD  PRO    96      65.774  73.947  31.825  1.00  0.00
ATOM    749  CG  PRO    96      65.304  73.042  32.914  1.00  0.00
ATOM    750  CB  PRO    96      65.377  73.946  34.127  1.00  0.00
ATOM    751  CA  PRO    96      66.683  74.692  33.895  1.00  0.00
ATOM    752  C   PRO    96      67.871  73.879  34.432  1.00  0.00
ATOM    753  O   PRO    96      68.082  73.902  35.648  1.00  0.00
ATOM    754  N   GLU    97      68.553  73.131  33.590  1.00  0.00
ATOM    755  CA  GLU    97      69.731  72.283  33.983  1.00  0.00
ATOM    756  CB  GLU    97      70.456  71.613  32.814  1.00  0.00
ATOM    757  CG  GLU    97      69.606  70.951  31.729  1.00  0.00
ATOM    758  CD  GLU    97      69.182  69.604  32.218  1.00  0.00
ATOM    759  OE1 GLU    97      69.709  68.507  31.854  1.00  0.00
ATOM    760  OE2 GLU    97      68.321  69.564  33.174  1.00  0.00
ATOM    761  C   GLU    97      70.850  72.894  34.915  1.00  0.00
ATOM    762  O   GLU    97      71.278  72.276  35.891  1.00  0.00
ATOM    763  N   ARG    98      71.238  74.195  34.580  1.00  0.00
ATOM    764  CA  ARG    98      72.056  75.017  35.486  1.00  0.00
ATOM    765  CB  ARG    98      72.359  76.338  34.716  1.00  0.00
ATOM    766  CG  ARG    98      73.338  77.222  35.480  1.00  0.00
ATOM    767  CD  ARG    98      73.841  78.532  34.757  1.00  0.00
ATOM    768  NE  ARG    98      72.789  79.587  34.574  1.00  0.00
ATOM    769  CZ  ARG    98      72.952  80.906  34.403  1.00  0.00
ATOM    770  NH1 ARG    98      71.956  81.664  34.090  1.00  0.00
ATOM    771  NH2 ARG    98      74.093  81.440  34.550  1.00  0.00
ATOM    772  C   ARG    98      71.476  75.264  36.859  1.00  0.00
ATOM    773  O   ARG    98      72.229  75.096  37.811  1.00  0.00
ATOM    774  N   ASN    99      70.129  75.485  37.066  1.00  0.00
ATOM    775  CA  ASN    99      69.513  75.596  38.357  1.00  0.00
ATOM    776  CB  ASN    99      68.061  75.940  38.136  1.00  0.00
ATOM    777  CG  ASN    99      67.406  76.297  39.433  1.00  0.00
ATOM    778  OD1 ASN    99      66.834  75.459  40.096  1.00  0.00
ATOM    779  ND2 ASN    99      67.475  77.550  39.745  1.00  0.00
ATOM    780  C   ASN    99      69.634  74.210  39.094  1.00  0.00
ATOM    781  O   ASN    99      70.098  74.105  40.264  1.00  0.00
ATOM    782  N   GLU   100      69.286  73.138  38.362  1.00  0.00
ATOM    783  CA  GLU   100      69.202  71.764  38.885  1.00  0.00
ATOM    784  CB  GLU   100      68.537  70.814  37.954  1.00  0.00
ATOM    785  CG  GLU   100      68.315  69.384  38.560  1.00  0.00
ATOM    786  CD  GLU   100      67.283  68.443  37.844  1.00  0.00
ATOM    787  OE1 GLU   100      66.307  67.984  38.409  1.00  0.00
ATOM    788  OE2 GLU   100      67.320  68.325  36.617  1.00  0.00
ATOM    789  C   GLU   100      70.615  71.223  39.395  1.00  0.00
ATOM    790  O   GLU   100      70.647  70.419  40.307  1.00  0.00
ATOM    791  N   CYX   101      71.740  71.620  38.798  1.00  0.00
ATOM    792  CA  CYX   101      73.075  71.222  39.215  1.00  0.00
ATOM    793  CB  CYX   101      73.987  71.828  38.165  1.00  0.00
ATOM    794  SG  CYX   101      75.725  71.435  38.345  1.00  0.00
ATOM    795  C   CYX   101      73.374  71.694  40.625  1.00  0.00
ATOM    796  O   CYX   101      73.874  70.908  41.465  1.00  0.00
ATOM    797  N   PHE   102      72.783  72.830  41.120  1.00  0.00
ATOM    798  CA  PHE   102      72.861  73.327  42.525  1.00  0.00
ATOM    799  CB  PHE   102      72.594  74.827  42.428  1.00  0.00
ATOM    800  CG  PHE   102      73.738  75.727  41.982  1.00  0.00
ATOM    801  CD1 PHE   102      74.770  76.040  42.888  1.00  0.00
ATOM    802  CE1 PHE   102      75.837  76.866  42.449  1.00  0.00
ATOM    803  CZ  PHE   102      75.935  77.211  41.060  1.00  0.00
ATOM    804  CE2 PHE   102      74.947  76.766  40.157  1.00  0.00
ATOM    805  CD2 PHE   102      73.754  76.193  40.632  1.00  0.00
ATOM    806  C   PHE   102      71.876  72.597  43.478  1.00  0.00
ATOM    807  O   PHE   102      72.178  72.382  44.659  1.00  0.00
ATOM    808  N   LEU   103      70.638  72.258  43.068  1.00  0.00
ATOM    809  CA  LEU   103      69.740  71.309  43.795  1.00  0.00
ATOM    810  CB  LEU   103      68.374  71.234  42.944  1.00  0.00
ATOM    811  CG  LEU   103      67.472  72.433  42.966  1.00  0.00
ATOM    812  CD1 LEU   103      66.146  72.035  42.340  1.00  0.00
ATOM    813  CD2 LEU   103      67.264  72.834  44.412  1.00  0.00
ATOM    814  C   LEU   103      70.311  69.910  44.047  1.00  0.00
ATOM    815  O   LEU   103      69.784  69.220  44.991  1.00  0.00
ATOM    816  N   GLN   104      71.236  69.504  43.176  1.00  0.00
ATOM    817  CA  GLN   104      71.855  68.173  43.079  1.00  0.00
ATOM    818  CB  GLN   104      72.037  67.806  41.656  1.00  0.00
ATOM    819  CG  GLN   104      70.685  67.363  40.997  1.00  0.00
ATOM    820  CD  GLN   104      70.846  66.816  39.561  1.00  0.00
ATOM    821  OE1 GLN   104      71.810  67.056  38.872  1.00  0.00
ATOM    822  NE2 GLN   104      69.914  66.060  39.073  1.00  0.00
ATOM    823  C   GLN   104      73.195  68.141  43.861  1.00  0.00
ATOM    824  O   GLN   104      73.764  67.079  44.008  1.00  0.00
ATOM    825  N   HID   105      73.525  69.210  44.619  1.00  0.00
ATOM    826  CA  HID   105      74.595  69.307  45.580  1.00  0.00
ATOM    827  CB  HID   105      75.768  70.053  45.000  1.00  0.00
ATOM    828  CG  HID   105      76.531  69.276  43.913  1.00  0.00
ATOM    829  ND1 HID   105      76.262  69.400  42.522  1.00  0.00
ATOM    830  CE1 HID   105      76.944  68.497  41.883  1.00  0.00
ATOM    831  NE2 HID   105      77.749  67.816  42.698  1.00  0.00
ATOM    832  CD2 HID   105      77.451  68.223  43.986  1.00  0.00
ATOM    833  C   HID   105      74.201  69.897  46.995  1.00  0.00
ATOM    834  O   HID   105      75.042  70.320  47.791  1.00  0.00
ATOM    835  N   LYS   106      72.913  69.873  47.268  1.00  0.00
ATOM    836  CA  LYS   106      72.364  70.096  48.621  1.00  0.00
ATOM    837  CB  LYS   106      70.849  70.376  48.452  1.00  0.00
ATOM    838  CG  LYS   106      70.584  71.545  47.525  1.00  0.00
ATOM    839  CD  LYS   106      69.163  72.113  47.626  1.00  0.00
ATOM    840  CE  LYS   106      68.105  70.971  47.642  1.00  0.00
ATOM    841  NZ  LYS   106      66.779  71.340  48.169  1.00  0.00
ATOM    842  C   LYS   106      72.641  69.012  49.674  1.00  0.00
ATOM    843  O   LYS   106      72.341  67.837  49.390  1.00  0.00
ATOM    844  N   ASP   107      73.007  69.425  50.916  1.00  0.00
ATOM    845  CA  ASP   107      73.321  68.408  51.933  1.00  0.00
ATOM    846  CB  ASP   107      74.848  68.018  51.885  1.00  0.00
ATOM    847  CG  ASP   107      75.277  66.814  52.739  1.00  0.00
ATOM    848  OD1 ASP   107      76.506  66.583  52.889  1.00  0.00
ATOM    849  OD2 ASP   107      74.452  66.078  53.255  1.00  0.00
ATOM    850  C   ASP   107      73.086  68.903  53.383  1.00  0.00
ATOM    851  O   ASP   107      73.639  69.890  53.849  1.00  0.00
ATOM    852  N   ASP   108      72.226  68.212  54.177  1.00  0.00
ATOM    853  CA  ASP   108      71.771  68.668  55.477  1.00  0.00
ATOM    854  CB  ASP   108      70.331  68.280  55.771  1.00  0.00
ATOM    855  CG  ASP   108      70.089  66.741  55.429  1.00  0.00
ATOM    856  OD1 ASP   108      68.902  66.292  55.661  1.00  0.00
ATOM    857  OD2 ASP   108      71.048  65.944  55.380  1.00  0.00
ATOM    858  C   ASP   108      72.693  68.105  56.553  1.00  0.00
ATOM    859  O   ASP   108      72.284  68.185  57.748  1.00  0.00
ATOM    860  N   ASN   109      73.915  67.663  56.228  1.00  0.00
ATOM    861  CA  ASN   109      75.022  67.399  57.146  1.00  0.00
ATOM    862  CB  ASN   109      75.315  65.850  57.175  1.00  0.00
ATOM    863  CG  ASN   109      76.371  65.444  58.228  1.00  0.00
ATOM    864  OD1 ASN   109      76.078  65.688  59.432  1.00  0.00
ATOM    865  ND2 ASN   109      77.279  64.605  57.816  1.00  0.00
ATOM    866  C   ASN   109      76.294  68.163  56.866  1.00  0.00
ATOM    867  O   ASN   109      77.375  67.600  56.668  1.00  0.00
ATOM    868  N   PRO   110      76.293  69.505  56.861  1.00  0.00
ATOM    869  CD  PRO   110      75.102  70.337  57.031  1.00  0.00
ATOM    870  CG  PRO   110      75.751  71.778  57.047  1.00  0.00
ATOM    871  CB  PRO   110      77.019  71.699  56.272  1.00  0.00
ATOM    872  CA  PRO   110      77.504  70.268  56.620  1.00  0.00
ATOM    873  C   PRO   110      78.401  70.242  57.850  1.00  0.00
ATOM    874  O   PRO   110      78.014  69.841  58.996  1.00  0.00
ATOM    875  N   ASN   111      79.680  70.606  57.669  1.00  0.00
ATOM    876  CA  ASN   111      80.715  70.505  58.735  1.00  0.00
ATOM    877  CB  ASN   111      82.133  70.535  58.045  1.00  0.00
ATOM    878  CG  ASN   111      82.395  71.721  57.204  1.00  0.00
ATOM    879  OD1 ASN   111      81.865  72.797  57.504  1.00  0.00
ATOM    880  ND2 ASN   111      83.216  71.659  56.175  1.00  0.00
ATOM    881  C   ASN   111      80.521  71.505  59.941  1.00  0.00
ATOM    882  O   ASN   111      81.438  71.580  60.828  1.00  0.00
ATOM    883  N   LEU   112      79.528  72.411  59.805  1.00  0.00
ATOM    884  CA  LEU   112      79.087  73.167  60.950  1.00  0.00
ATOM    885  CB  LEU   112      77.861  73.961  60.634  1.00  0.00
ATOM    886  CG  LEU   112      78.008  75.035  59.531  1.00  0.00
ATOM    887  CD1 LEU   112      76.677  75.856  59.572  1.00  0.00
ATOM    888  CD2 LEU   112      79.048  76.070  59.623  1.00  0.00
ATOM    889  C   LEU   112      78.749  72.240  62.168  1.00  0.00
ATOM    890  O   LEU   112      78.101  71.157  61.994  1.00  0.00
ATOM    891  N   PRO   113      79.205  72.551  63.372  1.00  0.00
ATOM    892  CD  PRO   113      80.068  73.687  63.717  1.00  0.00
ATOM    893  CG  PRO   113      80.087  73.797  65.201  1.00  0.00
ATOM    894  CB  PRO   113      79.837  72.353  65.642  1.00  0.00
ATOM    895  CA  PRO   113      78.972  71.705  64.536  1.00  0.00
ATOM    896  C   PRO   113      77.435  71.752  64.879  1.00  0.00
ATOM    897  O   PRO   113      76.747  72.735  64.629  1.00  0.00
ATOM    898  N   ARG   114      76.999  70.715  65.600  1.00  0.00
ATOM    899  CA  ARG   114      75.575  70.532  66.083  1.00  0.00
ATOM    900  CB  ARG   114      75.028  69.423  65.181  1.00  0.00
ATOM    901  CG  ARG   114      73.565  69.138  64.969  1.00  0.00
ATOM    902  CD  ARG   114      73.253  68.129  63.835  1.00  0.00
ATOM    903  NE  ARG   114      71.837  68.056  63.541  1.00  0.00
ATOM    904  CZ  ARG   114      71.180  67.650  62.456  1.00  0.00
ATOM    905  NH1 ARG   114      69.929  67.591  62.394  1.00  0.00
ATOM    906  NH2 ARG   114      71.770  67.262  61.343  1.00  0.00
ATOM    907  C   ARG   114      75.457  70.314  67.559  1.00  0.00
ATOM    908  O   ARG   114      76.367  70.055  68.297  1.00  0.00
ATOM    909  N   LEU   115      74.342  70.731  68.025  1.00  0.00
ATOM    910  CA  LEU   115      73.977  70.882  69.389  1.00  0.00
ATOM    911  CB  LEU   115      73.618  69.469  69.903  1.00  0.00
ATOM    912  CG  LEU   115      72.525  68.789  69.076  1.00  0.00
ATOM    913  CD1 LEU   115      72.170  67.436  69.646  1.00  0.00
ATOM    914  CD2 LEU   115      71.260  69.629  69.068  1.00  0.00
ATOM    915  C   LEU   115      74.954  71.773  70.384  1.00  0.00
ATOM    916  O   LEU   115      75.308  71.288  71.515  1.00  0.00
ATOM    917  N   VAL   116      75.355  72.902  69.926  1.00  0.00
ATOM    918  CA  VAL   116      76.392  73.748  70.461  1.00  0.00
ATOM    919  CB  VAL   116      77.549  73.841  69.509  1.00  0.00
ATOM    920  CG1 VAL   116      78.479  72.643  69.815  1.00  0.00
ATOM    921  CG2 VAL   116      77.249  73.830  68.039  1.00  0.00
ATOM    922  C   VAL   116      75.973  75.176  70.778  1.00  0.00
ATOM    923  O   VAL   116      75.369  75.868  69.943  1.00  0.00
ATOM    924  N   ARG   117      76.126  75.619  72.065  1.00  0.00
ATOM    925  CA  ARG   117      75.609  76.833  72.694  1.00  0.00
ATOM    926  CB  ARG   117      76.058  76.924  74.175  1.00  0.00
ATOM    927  CG  ARG   117      77.613  77.076  74.224  1.00  0.00
ATOM    928  CD  ARG   117      78.142  77.304  75.681  1.00  0.00
ATOM    929  NE  ARG   117      77.837  76.190  76.551  1.00  0.00
ATOM    930  CZ  ARG   117      78.543  75.756  77.515  1.00  0.00
ATOM    931  NH1 ARG   117      77.969  74.940  78.337  1.00  0.00
ATOM    932  NH2 ARG   117      79.772  76.217  77.829  1.00  0.00
ATOM    933  C   ARG   117      76.110  77.973  71.745  1.00  0.00
ATOM    934  O   ARG   117      77.322  78.079  71.487  1.00  0.00
ATOM    935  N   PRO   118      75.250  78.873  71.277  1.00  0.00
ATOM    936  CD  PRO   118      73.907  78.506  70.911  1.00  0.00
ATOM    937  CG  PRO   118      73.291  79.820  70.446  1.00  0.00
ATOM    938  CB  PRO   118      74.484  80.546  69.897  1.00  0.00
ATOM    939  CA  PRO   118      75.619  80.211  70.921  1.00  0.00
ATOM    940  C   PRO   118      75.782  81.232  72.045  1.00  0.00
ATOM    941  O   PRO   118      75.212  81.101  73.146  1.00  0.00
ATOM    942  N   GLU   119      76.619  82.234  71.792  1.00  0.00
ATOM    943  CA  GLU   119      76.922  83.345  72.703  1.00  0.00
ATOM    944  CB  GLU   119      78.278  83.835  72.322  1.00  0.00
ATOM    945  CG  GLU   119      78.845  84.752  73.391  1.00  0.00
ATOM    946  CD  GLU   119      80.242  84.540  73.683  1.00  0.00
ATOM    947  OE1 GLU   119      81.151  85.029  72.964  1.00  0.00
ATOM    948  OE2 GLU   119      80.504  83.739  74.646  1.00  0.00
ATOM    949  C   GLU   119      75.763  84.469  72.581  1.00  0.00
ATOM    950  O   GLU   119      76.004  85.524  71.981  1.00  0.00
ATOM    951  N   VAL   120      74.639  84.239  73.308  1.00  0.00
ATOM    952  CA  VAL   120      73.420  85.050  73.213  1.00  0.00
ATOM    953  CB  VAL   120      72.167  84.342  73.742  1.00  0.00
ATOM    954  CG1 VAL   120      71.834  83.302  72.659  1.00  0.00
ATOM    955  CG2 VAL   120      72.379  83.614  75.090  1.00  0.00
ATOM    956  C   VAL   120      73.475  86.396  73.972  1.00  0.00
ATOM    957  O   VAL   120      72.735  87.266  73.534  1.00  0.00
ATOM    958  N   ASP   121      74.418  86.595  74.929  1.00  0.00
ATOM    959  CA  ASP   121      74.657  87.855  75.634  1.00  0.00
ATOM    960  CB  ASP   121      75.851  87.707  76.704  1.00  0.00
ATOM    961  CG  ASP   121      76.061  88.956  77.539  1.00  0.00
ATOM    962  OD1 ASP   121      77.216  89.356  77.748  1.00  0.00
ATOM    963  OD2 ASP   121      75.090  89.546  78.027  1.00  0.00
ATOM    964  C   ASP   121      74.927  89.017  74.635  1.00  0.00
ATOM    965  O   ASP   121      74.647  90.115  74.962  1.00  0.00
ATOM    966  N   VAL   122      75.417  88.757  73.474  1.00  0.00
ATOM    967  CA  VAL   122      75.796  89.618  72.355  1.00  0.00
ATOM    968  CB  VAL   122      77.048  89.031  71.784  1.00  0.00
ATOM    969  CG1 VAL   122      77.618  90.045  70.781  1.00  0.00
ATOM    970  CG2 VAL   122      78.141  88.994  72.834  1.00  0.00
ATOM    971  C   VAL   122      74.731  89.708  71.264  1.00  0.00
ATOM    972  O   VAL   122      74.528  90.788  70.703  1.00  0.00
ATOM    973  N   MET   123      73.979  88.645  71.083  1.00  0.00
ATOM    974  CA  MET   123      72.937  88.566  70.004  1.00  0.00
ATOM    975  CB  MET   123      72.609  87.145  69.540  1.00  0.00
ATOM    976  CG  MET   123      73.911  86.284  69.300  1.00  0.00
ATOM    977  SD  MET   123      73.641  84.454  69.140  1.00  0.00
ATOM    978  CE  MET   123      75.193  84.059  68.276  1.00  0.00
ATOM    979  C   MET   123      71.703  89.317  70.475  1.00  0.00
ATOM    980  O   MET   123      70.938  89.875  69.702  1.00  0.00
ATOM    981  N   CYX   124      71.422  89.378  71.796  1.00  0.00
ATOM    982  CA  CYX   124      70.342  90.246  72.315  1.00  0.00
ATOM    983  CB  CYX   124      70.278  89.989  73.770  1.00  0.00
ATOM    984  SG  CYX   124      69.061  88.695  74.161  1.00  0.00
ATOM    985  C   CYX   124      70.641  91.727  71.921  1.00  0.00
ATOM    986  O   CYX   124      69.748  92.435  71.496  1.00  0.00
ATOM    987  N   THR   125      71.871  92.184  72.136  1.00  0.00
ATOM    988  CA  THR   125      72.395  93.506  71.784  1.00  0.00
ATOM    989  CB  THR   125      73.878  93.792  72.130  1.00  0.00
ATOM    990  CG2 THR   125      74.227  95.321  72.113  1.00  0.00
ATOM    991  OG1 THR   125      74.109  93.343  73.378  1.00  0.00
ATOM    992  C   THR   125      72.256  93.662  70.252  1.00  0.00
ATOM    993  O   THR   125      71.544  94.590  69.849  1.00  0.00
ATOM    994  N   ALA   126      72.856  92.780  69.415  1.00  0.00
ATOM    995  CA  ALA   126      72.725  92.886  67.979  1.00  0.00
ATOM    996  CB  ALA   126      73.589  91.825  67.281  1.00  0.00
ATOM    997  C   ALA   126      71.254  92.826  67.519  1.00  0.00
ATOM    998  O   ALA   126      70.857  93.545  66.608  1.00  0.00
ATOM    999  N   PHE   127      70.413  92.208  68.330  1.00  0.00
ATOM   1000  CA  PHE   127      68.911  92.162  68.069  1.00  0.00
ATOM   1001  CB  PHE   127      68.167  91.101  68.874  1.00  0.00
ATOM   1002  CG  PHE   127      66.633  91.218  68.745  1.00  0.00
ATOM   1003  CD1 PHE   127      65.948  91.241  67.509  1.00  0.00
ATOM   1004  CE1 PHE   127      64.523  91.153  67.409  1.00  0.00
ATOM   1005  CZ  PHE   127      63.756  91.163  68.612  1.00  0.00
ATOM   1006  CE2 PHE   127      64.473  91.194  69.843  1.00  0.00
ATOM   1007  CD2 PHE   127      65.860  91.113  69.936  1.00  0.00
ATOM   1008  C   PHE   127      68.135  93.522  68.281  1.00  0.00
ATOM   1009  O   PHE   127      67.331  93.988  67.445  1.00  0.00
ATOM   1010  N   HID   128      68.495  94.171  69.360  1.00  0.00
ATOM   1011  CA  HID   128      68.059  95.553  69.620  1.00  0.00
ATOM   1012  CB  HID   128      67.928  95.819  71.151  1.00  0.00
ATOM   1013  CG  HID   128      66.772  95.163  71.851  1.00  0.00
ATOM   1014  ND1 HID   128      65.463  95.365  71.466  1.00  0.00
ATOM   1015  CE1 HID   128      64.660  94.524  72.037  1.00  0.00
ATOM   1016  NE2 HID   128      65.334  93.600  72.784  1.00  0.00
ATOM   1017  CD2 HID   128      66.684  94.061  72.653  1.00  0.00
ATOM   1018  C   HID   128      68.720  96.700  68.914  1.00  0.00
ATOM   1019  O   HID   128      68.021  97.637  68.565  1.00  0.00
ATOM   1020  N   ASP   129      70.041  96.641  68.643  1.00  0.00
ATOM   1021  CA  ASP   129      70.730  97.580  67.673  1.00  0.00
ATOM   1022  CB  ASP   129      72.243  97.327  67.643  1.00  0.00
ATOM   1023  CG  ASP   129      73.019  98.322  66.705  1.00  0.00
ATOM   1024  OD1 ASP   129      73.855  99.091  67.204  1.00  0.00
ATOM   1025  OD2 ASP   129      72.758  98.249  65.468  1.00  0.00
ATOM   1026  C   ASP   129      70.062  97.500  66.243  1.00  0.00
ATOM   1027  O   ASP   129      69.550  98.561  65.846  1.00  0.00
ATOM   1028  N   ASN   130      69.868  96.289  65.652  1.00  0.00
ATOM   1029  CA  ASN   130      69.258  96.150  64.344  1.00  0.00
ATOM   1030  CB  ASN   130      70.354  96.434  63.289  1.00  0.00
ATOM   1031  CG  ASN   130      69.761  96.751  61.884  1.00  0.00
ATOM   1032  OD1 ASN   130      68.564  96.571  61.556  1.00  0.00
ATOM   1033  ND2 ASN   130      70.553  97.346  61.025  1.00  0.00
ATOM   1034  C   ASN   130      68.529  94.820  64.120  1.00  0.00
ATOM   1035  O   ASN   130      69.098  93.853  63.650  1.00  0.00
ATOM   1036  N   GLU   131      67.201  94.899  64.092  1.00  0.00
ATOM   1037  CA  GLU   131      66.300  93.735  63.743  1.00  0.00
ATOM   1038  CB  GLU   131      64.897  94.104  63.959  1.00  0.00
ATOM   1039  CG  GLU   131      63.874  93.036  63.587  1.00  0.00
ATOM   1040  CD  GLU   131      62.426  93.301  63.962  1.00  0.00
ATOM   1041  OE1 GLU   131      61.568  93.370  63.073  1.00  0.00
ATOM   1042  OE2 GLU   131      62.019  93.155  65.128  1.00  0.00
ATOM   1043  C   GLU   131      66.466  93.172  62.339  1.00  0.00
ATOM   1044  O   GLU   131      66.633  91.956  62.133  1.00  0.00
ATOM   1045  N   GLU   132      66.547  94.051  61.336  1.00  0.00
ATOM   1046  CA  GLU   132      66.623  93.635  59.980  1.00  0.00
ATOM   1047  CB  GLU   132      66.694  94.847  59.076  1.00  0.00
ATOM   1048  CG  GLU   132      65.420  95.622  59.121  1.00  0.00
ATOM   1049  CD  GLU   132      65.481  96.791  58.190  1.00  0.00
ATOM   1050  OE1 GLU   132      64.809  96.790  57.152  1.00  0.00
ATOM   1051  OE2 GLU   132      66.163  97.843  58.423  1.00  0.00
ATOM   1052  C   GLU   132      67.870  92.735  59.634  1.00  0.00
ATOM   1053  O   GLU   132      67.799  91.755  58.942  1.00  0.00
ATOM   1054  N   THR   133      68.958  93.162  60.272  1.00  0.00
ATOM   1055  CA  THR   133      70.146  92.407  60.139  1.00  0.00
ATOM   1056  CB  THR   133      71.409  93.182  60.565  1.00  0.00
ATOM   1057  CG2 THR   133      72.706  92.536  59.959  1.00  0.00
ATOM   1058  OG1 THR   133      71.330  94.538  60.158  1.00  0.00
ATOM   1059  C   THR   133      70.139  91.062  60.881  1.00  0.00
ATOM   1060  O   THR   133      70.618  90.051  60.374  1.00  0.00
ATOM   1061  N   PHE   134      69.546  91.067  62.079  1.00  0.00
ATOM   1062  CA  PHE   134      69.498  89.884  62.906  1.00  0.00
ATOM   1063  CB  PHE   134      68.856  90.345  64.252  1.00  0.00
ATOM   1064  CG  PHE   134      68.630  89.213  65.131  1.00  0.00
ATOM   1065  CD1 PHE   134      67.287  88.861  65.537  1.00  0.00
ATOM   1066  CE1 PHE   134      67.134  87.832  66.473  1.00  0.00
ATOM   1067  CZ  PHE   134      68.238  87.221  67.075  1.00  0.00
ATOM   1068  CE2 PHE   134      69.542  87.569  66.702  1.00  0.00
ATOM   1069  CD2 PHE   134      69.721  88.480  65.654  1.00  0.00
ATOM   1070  C   PHE   134      68.647  88.756  62.221  1.00  0.00
ATOM   1071  O   PHE   134      69.073  87.579  62.133  1.00  0.00
ATOM   1072  N   LEU   135      67.558  89.187  61.532  1.00  0.00
ATOM   1073  CA  LEU   135      66.633  88.202  60.962  1.00  0.00
ATOM   1074  CB  LEU   135      65.352  88.950  60.672  1.00  0.00
ATOM   1075  CG  LEU   135      64.427  89.155  61.884  1.00  0.00
ATOM   1076  CD1 LEU   135      63.220  89.944  61.610  1.00  0.00
ATOM   1077  CD2 LEU   135      63.816  87.836  62.430  1.00  0.00
ATOM   1078  C   LEU   135      67.240  87.485  59.755  1.00  0.00
ATOM   1079  O   LEU   135      67.002  86.250  59.722  1.00  0.00
ATOM   1080  N   LYN   136      67.825  88.312  58.830  1.00  0.00
ATOM   1081  CA  LYN   136      68.490  87.704  57.647  1.00  0.00
ATOM   1082  CB  LYN   136      68.960  88.848  56.738  1.00  0.00
ATOM   1083  CG  LYN   136      67.924  89.625  55.932  1.00  0.00
ATOM   1084  CD  LYN   136      68.554  90.612  54.911  1.00  0.00
ATOM   1085  CE  LYN   136      69.389  91.668  55.614  1.00  0.00
ATOM   1086  NZ  LYN   136      68.618  92.508  56.516  1.00  0.00
ATOM   1087  C   LYN   136      69.608  86.813  58.041  1.00  0.00
ATOM   1088  O   LYN   136      69.681  85.760  57.365  1.00  0.00
ATOM   1089  N   LYS   137      70.352  87.062  59.116  1.00  0.00
ATOM   1090  CA  LYS   137      71.428  86.180  59.572  1.00  0.00
ATOM   1091  CB  LYS   137      72.267  86.925  60.521  1.00  0.00
ATOM   1092  CG  LYS   137      73.530  86.288  61.098  1.00  0.00
ATOM   1093  CD  LYS   137      74.544  85.770  60.007  1.00  0.00
ATOM   1094  CE  LYS   137      75.570  84.635  60.339  1.00  0.00
ATOM   1095  NZ  LYS   137      76.511  84.896  61.463  1.00  0.00
ATOM   1096  C   LYS   137      70.833  84.876  60.085  1.00  0.00
ATOM   1097  O   LYS   137      71.425  83.836  59.817  1.00  0.00
ATOM   1098  N   TYR   138      69.622  84.928  60.658  1.00  0.00
ATOM   1099  CA  TYR   138      68.951  83.654  61.184  1.00  0.00
ATOM   1100  CB  TYR   138      67.980  84.041  62.301  1.00  0.00
ATOM   1101  CG  TYR   138      67.344  82.759  62.899  1.00  0.00
ATOM   1102  CD1 TYR   138      68.071  81.998  63.795  1.00  0.00
ATOM   1103  CE1 TYR   138      67.488  80.811  64.288  1.00  0.00
ATOM   1104  CZ  TYR   138      66.146  80.573  64.177  1.00  0.00
ATOM   1105  OH  TYR   138      65.466  79.494  64.702  1.00  0.00
ATOM   1106  CE2 TYR   138      65.325  81.501  63.486  1.00  0.00
ATOM   1107  CD2 TYR   138      65.941  82.540  62.738  1.00  0.00
ATOM   1108  C   TYR   138      68.243  82.801  60.085  1.00  0.00
ATOM   1109  O   TYR   138      68.533  81.622  59.967  1.00  0.00
ATOM   1110  N   LEU   139      67.651  83.423  59.072  1.00  0.00
ATOM   1111  CA  LEU   139      67.322  82.706  57.800  1.00  0.00
ATOM   1112  CB  LEU   139      66.640  83.620  56.764  1.00  0.00
ATOM   1113  CG  LEU   139      65.229  84.123  57.116  1.00  0.00
ATOM   1114  CD1 LEU   139      64.932  85.201  56.063  1.00  0.00
ATOM   1115  CD2 LEU   139      64.193  83.099  57.249  1.00  0.00
ATOM   1116  C   LEU   139      68.589  82.156  57.122  1.00  0.00
ATOM   1117  O   LEU   139      68.622  80.952  56.765  1.00  0.00
ATOM   1118  N   TYR   140      69.661  82.898  56.907  1.00  0.00
ATOM   1119  CA  TYR   140      70.929  82.371  56.374  1.00  0.00
ATOM   1120  CB  TYR   140      72.004  83.439  56.379  1.00  0.00
ATOM   1121  CG  TYR   140      73.457  82.964  56.222  1.00  0.00
ATOM   1122  CD1 TYR   140      73.856  82.534  54.948  1.00  0.00
ATOM   1123  CE1 TYR   140      75.189  82.050  54.785  1.00  0.00
ATOM   1124  CZ  TYR   140      76.010  81.765  55.876  1.00  0.00
ATOM   1125  OH  TYR   140      77.269  81.313  55.636  1.00  0.00
ATOM   1126  CE2 TYR   140      75.667  82.297  57.126  1.00  0.00
ATOM   1127  CD2 TYR   140      74.366  82.822  57.278  1.00  0.00
ATOM   1128  C   TYR   140      71.443  81.102  57.032  1.00  0.00
ATOM   1129  O   TYR   140      71.828  80.145  56.240  1.00  0.00
ATOM   1130  N   GLU   141      71.494  81.149  58.371  1.00  0.00
ATOM   1131  CA  GLU   141      72.052  80.110  59.241  1.00  0.00
ATOM   1132  CB  GLU   141      72.209  80.658  60.726  1.00  0.00
ATOM   1133  CG  GLU   141      73.445  81.502  61.038  1.00  0.00
ATOM   1134  CD  GLU   141      74.684  80.652  61.370  1.00  0.00
ATOM   1135  OE1 GLU   141      74.892  79.512  60.810  1.00  0.00
ATOM   1136  OE2 GLU   141      75.610  81.135  62.048  1.00  0.00
ATOM   1137  C   GLU   141      71.128  78.871  59.373  1.00  0.00
ATOM   1138  O   GLU   141      71.679  77.787  59.370  1.00  0.00
ATOM   1139  N   ILE   142      69.746  79.000  59.423  1.00  0.00
ATOM   1140  CA  ILE   142      68.865  77.872  59.418  1.00  0.00
ATOM   1141  CB  ILE   142      67.419  78.243  59.906  1.00  0.00
ATOM   1142  CG2 ILE   142      66.354  77.148  59.782  1.00  0.00
ATOM   1143  CG1 ILE   142      67.392  78.653  61.424  1.00  0.00
ATOM   1144  CD1 ILE   142      67.974  77.601  62.420  1.00  0.00
ATOM   1145  C   ILE   142      68.849  77.200  58.040  1.00  0.00
ATOM   1146  O   ILE   142      68.774  75.954  57.977  1.00  0.00
ATOM   1147  N   ALA   143      68.933  77.992  56.955  1.00  0.00
ATOM   1148  CA  ALA   143      68.928  77.395  55.544  1.00  0.00
ATOM   1149  CB  ALA   143      68.401  78.454  54.557  1.00  0.00
ATOM   1150  C   ALA   143      70.337  76.863  55.071  1.00  0.00
ATOM   1151  O   ALA   143      70.349  75.904  54.389  1.00  0.00
ATOM   1152  N   ARG   144      71.523  77.321  55.504  1.00  0.00
ATOM   1153  CA  ARG   144      72.756  76.595  55.236  1.00  0.00
ATOM   1154  CB  ARG   144      73.870  77.619  55.363  1.00  0.00
ATOM   1155  CG  ARG   144      74.264  78.167  56.805  1.00  0.00
ATOM   1156  CD  ARG   144      75.775  78.250  56.970  1.00  0.00
ATOM   1157  NE  ARG   144      76.131  78.858  58.261  1.00  0.00
ATOM   1158  CZ  ARG   144      77.314  79.330  58.570  1.00  0.00
ATOM   1159  NH1 ARG   144      77.531  79.769  59.759  1.00  0.00
ATOM   1160  NH2 ARG   144      78.350  79.328  57.723  1.00  0.00
ATOM   1161  C   ARG   144      73.001  75.333  56.108  1.00  0.00
ATOM   1162  O   ARG   144      73.910  74.549  55.737  1.00  0.00
ATOM   1163  N   ARG   145      72.124  75.078  57.093  1.00  0.00
ATOM   1164  CA  ARG   145      72.036  73.739  57.738  1.00  0.00
ATOM   1165  CB  ARG   145      71.640  73.919  59.212  1.00  0.00
ATOM   1166  CG  ARG   145      72.656  74.511  60.139  1.00  0.00
ATOM   1167  CD  ARG   145      72.298  74.293  61.632  1.00  0.00
ATOM   1168  NE  ARG   145      73.380  74.778  62.364  1.00  0.00
ATOM   1169  CZ  ARG   145      74.342  74.115  62.947  1.00  0.00
ATOM   1170  NH1 ARG   145      75.234  74.811  63.639  1.00  0.00
ATOM   1171  NH2 ARG   145      74.564  72.838  62.947  1.00  0.00
ATOM   1172  C   ARG   145      71.039  72.817  57.047  1.00  0.00
ATOM   1173  O   ARG   145      71.258  71.605  56.778  1.00  0.00
ATOM   1174  N   HIE   146      69.895  73.401  56.771  1.00  0.00
ATOM   1175  CA  HIE   146      68.667  72.732  56.329  1.00  0.00
ATOM   1176  CB  HIE   146      67.541  72.927  57.360  1.00  0.00
ATOM   1177  CG  HIE   146      67.866  72.335  58.697  1.00  0.00
ATOM   1178  ND1 HIE   146      68.400  71.069  58.908  1.00  0.00
ATOM   1179  CE1 HIE   146      68.645  70.989  60.237  1.00  0.00
ATOM   1180  NE2 HIE   146      68.113  72.014  60.799  1.00  0.00
ATOM   1181  CD2 HIE   146      67.628  72.935  59.907  1.00  0.00
ATOM   1182  C   HIE   146      68.273  73.125  54.949  1.00  0.00
ATOM   1183  O   HIE   146      67.313  73.835  54.817  1.00  0.00
ATOM   1184  N   PRO   147      68.990  72.600  53.953  1.00  0.00
ATOM   1185  CD  PRO   147      70.191  71.812  54.016  1.00  0.00
ATOM   1186  CG  PRO   147      70.544  71.391  52.605  1.00  0.00
ATOM   1187  CB  PRO   147      70.127  72.648  51.870  1.00  0.00
ATOM   1188  CA  PRO   147      68.811  73.093  52.597  1.00  0.00
ATOM   1189  C   PRO   147      67.574  72.534  51.917  1.00  0.00
ATOM   1190  O   PRO   147      67.498  72.445  50.681  1.00  0.00
ATOM   1191  N   TYR   148      66.519  72.386  52.677  1.00  0.00
ATOM   1192  CA  TYR   148      65.198  71.705  52.325  1.00  0.00
ATOM   1193  CB  TYR   148      65.321  70.243  52.544  1.00  0.00
ATOM   1194  CG  TYR   148      66.292  69.430  51.553  1.00  0.00
ATOM   1195  CD1 TYR   148      65.899  69.190  50.200  1.00  0.00
ATOM   1196  CE1 TYR   148      66.745  68.480  49.364  1.00  0.00
ATOM   1197  CZ  TYR   148      67.999  67.991  49.822  1.00  0.00
ATOM   1198  OH  TYR   148      68.899  67.388  48.972  1.00  0.00
ATOM   1199  CE2 TYR   148      68.439  68.356  51.104  1.00  0.00
ATOM   1200  CD2 TYR   148      67.590  69.077  51.966  1.00  0.00
ATOM   1201  C   TYR   148      63.958  72.246  53.063  1.00  0.00
ATOM   1202  O   TYR   148      62.901  71.738  52.851  1.00  0.00
ATOM   1203  N   PHE   149      64.159  73.193  53.914  1.00  0.00
ATOM   1204  CA  PHE   149      63.040  73.795  54.654  1.00  0.00
ATOM   1205  CB  PHE   149      63.681  74.518  55.871  1.00  0.00
ATOM   1206  CG  PHE   149      62.722  74.757  57.036  1.00  0.00
ATOM   1207  CD1 PHE   149      61.711  75.664  56.904  1.00  0.00
ATOM   1208  CE1 PHE   149      60.838  75.962  57.986  1.00  0.00
ATOM   1209  CZ  PHE   149      61.145  75.517  59.329  1.00  0.00
ATOM   1210  CE2 PHE   149      62.226  74.649  59.479  1.00  0.00
ATOM   1211  CD2 PHE   149      62.991  74.252  58.323  1.00  0.00
ATOM   1212  C   PHE   149      62.219  74.670  53.665  1.00  0.00
ATOM   1213  O   PHE   149      62.786  75.381  52.840  1.00  0.00
ATOM   1214  N   TYR   150      60.863  74.655  53.792  1.00  0.00
ATOM   1215  CA  TYR   150      59.923  75.217  52.807  1.00  0.00
ATOM   1216  CB  TYR   150      58.524  74.567  53.074  1.00  0.00
ATOM   1217  CG  TYR   150      57.286  75.126  52.341  1.00  0.00
ATOM   1218  CD1 TYR   150      57.124  74.928  50.970  1.00  0.00
ATOM   1219  CE1 TYR   150      55.936  75.336  50.367  1.00  0.00
ATOM   1220  CZ  TYR   150      54.873  75.796  51.189  1.00  0.00
ATOM   1221  OH  TYR   150      53.669  76.172  50.623  1.00  0.00
ATOM   1222  CE2 TYR   150      55.047  76.062  52.559  1.00  0.00
ATOM   1223  CD2 TYR   150      56.254  75.721  53.198  1.00  0.00
ATOM   1224  C   TYR   150      60.006  76.740  52.878  1.00  0.00
ATOM   1225  O   TYR   150      59.738  77.287  53.913  1.00  0.00
ATOM   1226  N   ALA   151      60.332  77.393  51.795  1.00  0.00
ATOM   1227  CA  ALA   151      60.732  78.834  51.887  1.00  0.00
ATOM   1228  CB  ALA   151      61.281  79.312  50.543  1.00  0.00
ATOM   1229  C   ALA   151      59.610  79.838  52.422  1.00  0.00
ATOM   1230  O   ALA   151      59.992  80.715  53.214  1.00  0.00
ATOM   1231  N   PRO   152      58.340  79.639  52.131  1.00  0.00
ATOM   1232  CD  PRO   152      57.845  78.768  51.078  1.00  0.00
ATOM   1233  CG  PRO   152      56.641  79.537  50.500  1.00  0.00
ATOM   1234  CB  PRO   152      56.062  80.206  51.705  1.00  0.00
ATOM   1235  CA  PRO   152      57.317  80.567  52.538  1.00  0.00
ATOM   1236  C   PRO   152      56.996  80.603  54.060  1.00  0.00
ATOM   1237  O   PRO   152      56.764  81.698  54.572  1.00  0.00
ATOM   1238  N   GLU   153      57.092  79.477  54.671  1.00  0.00
ATOM   1239  CA  GLU   153      56.924  79.292  56.128  1.00  0.00
ATOM   1240  CB  GLU   153      56.381  77.922  56.365  1.00  0.00
ATOM   1241  CG  GLU   153      55.164  77.860  57.382  1.00  0.00
ATOM   1242  CD  GLU   153      53.784  78.118  56.651  1.00  0.00
ATOM   1243  OE1 GLU   153      52.914  77.220  56.520  1.00  0.00
ATOM   1244  OE2 GLU   153      53.546  79.246  56.239  1.00  0.00
ATOM   1245  C   GLU   153      58.192  79.580  56.991  1.00  0.00
ATOM   1246  O   GLU   153      58.118  79.918  58.172  1.00  0.00
ATOM   1247  N   LEU   154      59.372  79.627  56.314  1.00  0.00
ATOM   1248  CA  LEU   154      60.665  79.863  56.983  1.00  0.00
ATOM   1249  CB  LEU   154      61.724  79.398  55.982  1.00  0.00
ATOM   1250  CG  LEU   154      63.149  79.655  56.384  1.00  0.00
ATOM   1251  CD1 LEU   154      63.640  79.212  57.758  1.00  0.00
ATOM   1252  CD2 LEU   154      64.022  79.039  55.316  1.00  0.00
ATOM   1253  C   LEU   154      60.731  81.293  57.581  1.00  0.00
ATOM   1254  O   LEU   154      61.019  81.443  58.753  1.00  0.00
ATOM   1255  N   LEU   155      60.216  82.251  56.856  1.00  0.00
ATOM   1256  CA  LEU   155      59.860  83.584  57.320  1.00  0.00
ATOM   1257  CB  LEU   155      58.939  84.285  56.302  1.00  0.00
ATOM   1258  CG  LEU   155      59.471  84.282  54.916  1.00  0.00
ATOM   1259  CD1 LEU   155      58.743  85.311  54.073  1.00  0.00
ATOM   1260  CD2 LEU   155      60.959  84.596  54.659  1.00  0.00
ATOM   1261  C   LEU   155      59.194  83.631  58.762  1.00  0.00
ATOM   1262  O   LEU   155      59.473  84.444  59.677  1.00  0.00
ATOM   1263  N   PHE   156      58.197  82.721  58.967  1.00  0.00
ATOM   1264  CA  PHE   156      57.396  82.607  60.178  1.00  0.00
ATOM   1265  CB  PHE   156      56.028  82.027  59.811  1.00  0.00
ATOM   1266  CG  PHE   156      55.468  82.989  58.702  1.00  0.00
ATOM   1267  CD1 PHE   156      54.639  84.088  59.109  1.00  0.00
ATOM   1268  CE1 PHE   156      54.130  84.985  58.161  1.00  0.00
ATOM   1269  CZ  PHE   156      54.339  84.678  56.785  1.00  0.00
ATOM   1270  CE2 PHE   156      55.141  83.616  56.367  1.00  0.00
ATOM   1271  CD2 PHE   156      55.670  82.777  57.330  1.00  0.00
ATOM   1272  C   PHE   156      58.114  81.897  61.322  1.00  0.00
ATOM   1273  O   PHE   156      57.944  82.185  62.470  1.00  0.00
ATOM   1274  N   PHE   157      59.078  81.032  61.030  1.00  0.00
ATOM   1275  CA  PHE   157      59.909  80.348  61.986  1.00  0.00
ATOM   1276  CB  PHE   157      60.500  79.132  61.300  1.00  0.00
ATOM   1277  CG  PHE   157      61.229  78.196  62.188  1.00  0.00
ATOM   1278  CD1 PHE   157      62.632  78.261  62.194  1.00  0.00
ATOM   1279  CE1 PHE   157      63.403  77.294  62.866  1.00  0.00
ATOM   1280  CZ  PHE   157      62.724  76.157  63.209  1.00  0.00
ATOM   1281  CE2 PHE   157      61.292  76.045  63.148  1.00  0.00
ATOM   1282  CD2 PHE   157      60.572  77.068  62.640  1.00  0.00
ATOM   1283  C   PHE   157      61.023  81.211  62.528  1.00  0.00
ATOM   1284  O   PHE   157      61.186  81.300  63.747  1.00  0.00
ATOM   1285  N   ALA   158      61.531  82.131  61.612  1.00  0.00
ATOM   1286  CA  ALA   158      62.329  83.299  62.024  1.00  0.00
ATOM   1287  CB  ALA   158      62.953  83.948  60.718  1.00  0.00
ATOM   1288  C   ALA   158      61.557  84.285  62.926  1.00  0.00
ATOM   1289  O   ALA   158      62.031  84.650  63.967  1.00  0.00
ATOM   1290  N   LYS   159      60.242  84.549  62.658  1.00  0.00
ATOM   1291  CA  LYS   159      59.464  85.387  63.593  1.00  0.00
ATOM   1292  CB  LYS   159      58.221  85.954  62.914  1.00  0.00
ATOM   1293  CG  LYS   159      57.619  87.107  63.684  1.00  0.00
ATOM   1294  CD  LYS   159      56.526  87.876  62.962  1.00  0.00
ATOM   1295  CE  LYS   159      55.445  86.909  62.458  1.00  0.00
ATOM   1296  NZ  LYS   159      54.172  87.392  61.880  1.00  0.00
ATOM   1297  C   LYS   159      59.228  84.854  64.969  1.00  0.00
ATOM   1298  O   LYS   159      59.192  85.647  65.927  1.00  0.00
ATOM   1299  N   ARG   160      59.278  83.503  65.152  1.00  0.00
ATOM   1300  CA  ARG   160      59.287  82.945  66.512  1.00  0.00
ATOM   1301  CB  ARG   160      58.849  81.484  66.462  1.00  0.00
ATOM   1302  CG  ARG   160      57.388  81.324  66.064  1.00  0.00
ATOM   1303  CD  ARG   160      57.104  79.962  65.370  1.00  0.00
ATOM   1304  NE  ARG   160      57.585  78.781  66.239  1.00  0.00
ATOM   1305  CZ  ARG   160      57.647  77.545  65.844  1.00  0.00
ATOM   1306  NH1 ARG   160      58.225  76.693  66.598  1.00  0.00
ATOM   1307  NH2 ARG   160      57.250  77.160  64.682  1.00  0.00
ATOM   1308  C   ARG   160      60.660  82.970  67.257  1.00  0.00
ATOM   1309  O   ARG   160      60.694  83.151  68.487  1.00  0.00
ATOM   1310  N   TYR   161      61.750  82.964  66.499  1.00  0.00
ATOM   1311  CA  TYR   161      63.111  83.237  66.948  1.00  0.00
ATOM   1312  CB  TYR   161      64.139  82.937  65.864  1.00  0.00
ATOM   1313  CG  TYR   161      65.495  82.974  66.445  1.00  0.00
ATOM   1314  CD1 TYR   161      66.065  81.796  66.971  1.00  0.00
ATOM   1315  CE1 TYR   161      67.437  81.760  67.195  1.00  0.00
ATOM   1316  CZ  TYR   161      68.314  82.788  66.939  1.00  0.00
ATOM   1317  OH  TYR   161      69.628  82.664  67.122  1.00  0.00
[truncated: 1,158,562 more chars]
